# Supplementary material for: Morphological Characteristics and Transcriptome Landscapes of Chicken Follicles during Selective Development
Source: MDPI journal article supplement (doi:10.3390/ani12060713), 2022-03-11
Supplement: s1 [file s1]

## *Supplementary Material*

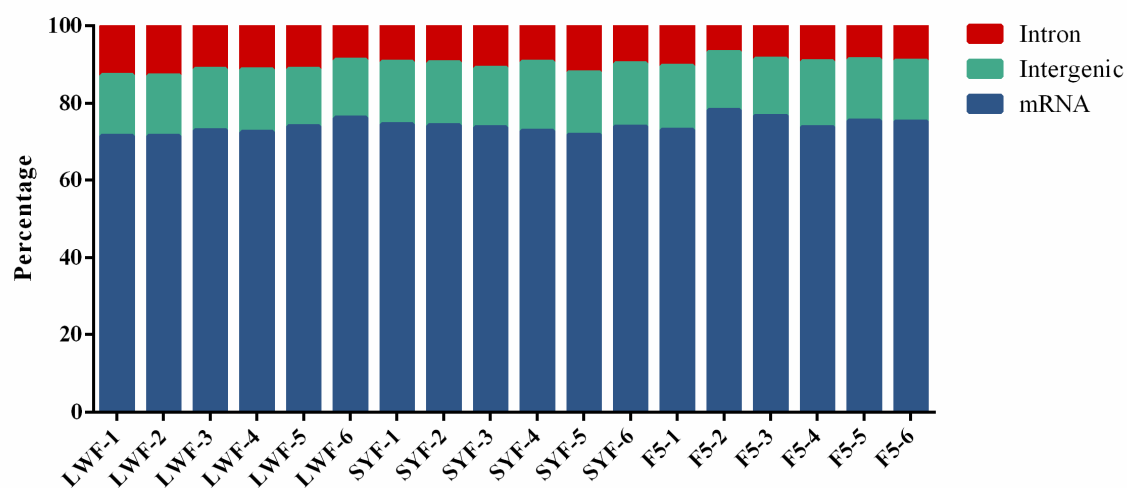

**Supplemental Figure S1.** Statistical diagram for the distribution of reads mapped to the reference genes.
