# Supplementary material for: Morphological Characteristics and Transcriptome Landscapes of Chicken Follicles during Selective Development
Source: Animals (Basel). 2022 Mar 11;12(6):713. doi: 10.3390/ani12060713 (PMC8944860; doi:10.3390/ani12060713)
Supplement: Supplementary file 1 [file animals-12-00713-s001.zip]

Archive with 8 entries (8 files):
- Supplementary materials/Supplemental Figure S1.pdf
- Supplementary materials/Supplemental Table S1.xlsx
- Supplementary materials/Supplemental Table S2.xlsx
- Supplementary materials/Supplemental Table S3.xlsx
- Supplementary materials/Supplemental Table S4.xlsx
- Supplementary materials/Supplemental Table S5.xlsx
- Supplementary materials/Supplemental Table S6.xlsx
- Supplementary materials/Supplemental Table S7.xlsx
