# Supplementary material for: Morphological Characteristics and Transcriptome Landscapes of Chicken Follicles during Selective Development
Source: Animals (Basel). 2022 Mar 11;12(6):713. doi: 10.3390/ani12060713 (PMC8944860; doi:10.3390/ani12060713)
Supplement: Supplementary file 1 [file animals-12-00713-s001.zip › Supplementary materials/Supplemental Table S1.xlsx]

## Sheet: Sheet1
Supplemental Table 1. Primers used for quantitative RT-PCR.
qRT-PCR target	Sense primer sequence (5'→3')	Antisense primer sequence (5'→3')	GenBank No	Size(bp)	Tm(◦C)
AMH	TGCACCTGGAGGAAGTGAAGT	AGTAGGTACTGGGTGTCCCT	NM_205030.1	229	60
CCNO	CCTGCAAACAGGTGGAGGT	GGAGGGTACTTGGTGAAGGC	XM_003642984.4	283	59
CDH3	AAATGGCAAACCCGTGGAG	TGAGGATGGAGTAGGCGATGA	XM_003641956.4	206	59
FSHR	TTCCAGCCTTCCCAAACTA	GCCGTAGAATCACACTTTCAG	NM_205079	257	59
FST	CAACTTATCCGAGCGAGTGT	GGTCTTCGTTAATGGAGTTGC	NM_205200.1	102	59
INHA	TCTCTTCCCTTCCACAGACGTG	CATCGGGGCCGAAGTCAAAC	NM_001031257.1	257	60
NPC2	AGAGCGAGTACCCCAGTATTAAG	CTGGCCTTGCAGGAACAAAG	NM_001031203.1	248	59
SFRP4	GGCCCCTCTGTTTGCAGAT	GCACCTGCATCGCTCCTG	XM_015281688.2	112	59
SORL1	AGGAGTGGGAAATTGGAGCG	AACGTAACCGCTGACCTTGA	NM_001305160.2	151	59
TMEM72	GTCACCATACCTGGGTCCAT	ACCTCTGGTTGGAGTGAAGC	XM_003641479.4	287	59
