# Supplementary material for: Morphological Characteristics and Transcriptome Landscapes of Chicken Follicles during Selective Development
Source: Animals (Basel). 2022 Mar 11;12(6):713. doi: 10.3390/ani12060713 (PMC8944860; doi:10.3390/ani12060713)
Supplement: Supplementary file 1 [file animals-12-00713-s001.zip › Supplementary materials/Supplemental Table S2.xlsx]

## Sheet: sheet1
Supplemental Table 2. Detailed information of RNA quality and RNA sample assessment
Sample	Concentration	Volume	Total quantity	28S/18S	RIN
	(ng/μL)	(μL)	(μg)
LWF-1	312	35	10.9	1.6	9.8
LWF-2	867	45	39	1.7	9.8
LWF-3	1125	44	49.5	1.7	9.8
LWF-4	690	36	24.8	1.8	9.8
LWF-5	985	43	42.4	1.8	9.9
LWF-6	555	31	17.2	1.7	9.9
SYF-1	498	26	13	1.6	9.8
SYF-2	1730	43	74.4	1.9	9.9
SYF-3	1180	40	47.2	1.8	9.9
SYF-4	552	37	20.4	1.7	9.8
SYF-5	2120	44	93.3	1.7	9.9
SYF-6	341	27	9.2	1.6	9.8
LYF-1	1085	37	40.2	2	10
LYF-2	935	75	70.1	1.6	9.8
LYF-3	1500	46	69	1.9	9.9
LYF-4	381	40	15.2	1.6	9.4
LYF-5	263	40	10.5	1.8	10
LYF-6	180	25	4.5	1.6	9.9
