# Supplementary material for: Morphological Characteristics and Transcriptome Landscapes of Chicken Follicles during Selective Development
Source: Animals (Basel). 2022 Mar 11;12(6):713. doi: 10.3390/ani12060713 (PMC8944860; doi:10.3390/ani12060713)
Supplement: Supplementary file 1 [file animals-12-00713-s001.zip › Supplementary materials/Supplemental Table S3.xlsx]

## Sheet: sheet1
Supplemental Table 3: Summary of the RNA-seq results.
Sample Name	Raw reads(M)	Clean reads (M)	Clean bases(G)	Q20	Q30	GC content	Unique mapping rate	Multiple mapping rate
LWF-1	62	56.5878	8.48148	0.972643	0.926868	0.48907	0.8714	0.935
LWF-2	65.7	59.8708	8.97	0.97215	0.925893	0.490432	0.8631	0.9311
LWF-3	57.5	54.1841	8.12162	0.972866	0.92734	0.48937	0.8736	0.9343
LWF-4	71	66.6737	9.99306	0.972424	0.926933	0.490428	0.8647	0.9318
LWF-5	60.9	55.9089	8.37977	0.974118	0.930328	0.491138	0.8752	0.9365
LWF-6	65.1	59.2828	8.8859	0.974148	0.929828	0.488899	0.8805	0.9402
SYF-1	67.2	61.91	9.279	0.972837	0.927989	0.492242	0.8655	0.9313
SYF-2	68.2	62.3759	9.3483	0.972772	0.927748	0.495876	0.8612	0.9306
SYF-3	64.8	59.4453	8.91002	0.972902	0.927095	0.490878	0.8681	0.9336
SYF-4	76.3	69.2203	10.3735	0.972581	0.927547	0.492738	0.8601	0.9287
SYF-5	63.5	56.8615	8.52214	0.974619	0.931305	0.489217	0.87	0.933
SYF-6	60.4	55.6848	8.34561	0.974146	0.93101	0.491161	0.8689	0.9328
LYF-1	76	71.9254	10.78	0.97317	0.928696	0.496094	0.864	0.9326
LYF-2	58.8	54.6308	8.18818	0.972107	0.926467	0.504049	0.8527	0.9282
LYF-3	61.8	57.5433	8.62502	0.972423	0.926619	0.49427	0.8638	0.9315
LYF-4	63.2	57.5603	8.62686	0.972651	0.927768	0.495144	0.8562	0.929
LYF-5	59.6	55.3029	8.28845	0.974382	0.931057	0.492583	0.875	0.9364
LYF-6	61.9	57.3558	8.59633	0.972861	0.927965	0.496032	0.8646	0.9334
