# Supplementary material for: Morphological Characteristics and Transcriptome Landscapes of Chicken Follicles during Selective Development
Source: Animals (Basel). 2022 Mar 11;12(6):713. doi: 10.3390/ani12060713 (PMC8944860; doi:10.3390/ani12060713)
Supplement: Supplementary file 1 [file animals-12-00713-s001.zip › Supplementary materials/Supplemental Table S4.xlsx]

## Sheet: All genes identified in LWF
ENSEMBL	LWF-1	LWF-2	LWF-3	LWF-4	LWF-5	LWF-6
ENSGALG00000000003	0.498884	0.774114	0.644499	0.745531	0.906068	1.25833
ENSGALG00000000011	10.0548	11.6058	13.1301	10.3324	12.4879	15.0046
ENSGALG00000000038	0.161381	0.476207	0	0	0	0.0854705
ENSGALG00000000044	0.471898	0.689292	0.389032	0.613586	0.89958	0.294231
ENSGALG00000000048	1.65196	0.766939	1.04676	1.13454	0.684264	1.12847
ENSGALG00000000055	58.0012	62.1776	65.503	56.4819	72.4709	114.542
ENSGALG00000000059	4.3706	5.01907	4.14426	5.07415	5.39992	30.0485
ENSGALG00000000067	10.6568	9.5566	7.74704	7.46858	10.2556	10.5501
ENSGALG00000000071	2.28764	2.24565	2.54984	2.67816	3.40171	3.68244
ENSGALG00000000086	29.4981	30.1943	30.2148	34.2082	35.6908	49.0641
ENSGALG00000000091	15.5977	17.6583	19.1101	15.5844	18.7656	28.429
ENSGALG00000000094	30.3204	32.7957	30.9533	27.6567	35.1984	55.4849
ENSGALG00000000102	19.8719	24.5272	20.7882	23.3737	28.8694	25.5185
ENSGALG00000000104	0.980016	1.47088	1.80135	1.72332	1.2901	1.2264
ENSGALG00000000106	7.12695	7.64689	6.99701	7.51034	8.24193	12.1712
ENSGALG00000000107	0.168841	0.0465437	0.383449	0.213566	0.174534	0.16842
ENSGALG00000000109	2.67836	2.85108	4.41754	4.30393	3.92871	3.01129
ENSGALG00000000112	0.087151	0.0209511	0.60513	0.0189969	0.387747	0.151817
ENSGALG00000000115	0.0913264	0	0.290932	0.160967	0.0950594	2.11394
ENSGALG00000000122	196.618	213.475	212.05	193.282	200.211	187.458
ENSGALG00000000129	23.6656	27.867	27.1871	24.4889	26.2261	36.5231
ENSGALG00000000137	50.4256	49.7843	45.0171	52.5612	57.3067	45.4752
ENSGALG00000000141	28.7428	16.8761	24.0231	24.8139	17.7319	16.5526
ENSGALG00000000142	30.7257	32.7315	36.0057	29.4719	34.5661	67.8983
ENSGALG00000000146	8.29454	9.12094	8.56456	6.61679	8.87793	8.44249
ENSGALG00000000150	274.164	263.244	254.756	213.529	226.509	181.837
ENSGALG00000000151	2.8171	2.16256	3.35793	1.87339	2.08436	3.168
ENSGALG00000000154	6.83382	6.62041	5.37334	4.45399	10.7205	17.3652
ENSGALG00000000156	37.8919	40.9479	46.0515	42.5607	38.0641	38.6718
ENSGALG00000000158	12.0615	10.0411	11.3656	11.5099	8.87723	7.35744
ENSGALG00000000161	6.36311	8.00989	7.03828	7.33161	9.72848	9.50271
ENSGALG00000000164	0	0.0507919	0.298868	0.17146	0.235657	0.861281
ENSGALG00000000168	4.22429	3.53456	4.35106	5.5956	7.42565	2.01542
ENSGALG00000000184	7.26746	6.19178	9.09093	7.04961	7.34876	3.86903
ENSGALG00000000186	5.4154	6.48361	7.03452	7.4515	9.56379	14.0872
ENSGALG00000000189	10.7758	12.1671	9.55753	8.83842	8.26568	8.57055
ENSGALG00000000195	5.8162	4.95584	4.31239	4.82321	4.18665	5.96719
ENSGALG00000000201	6.94823	8.20201	9.0337	9.46832	8.85542	9.69426
ENSGALG00000000208	14.6564	13.7546	11.571	14.4041	12.7232	9.46325
ENSGALG00000000209	18.1739	23.3613	24.1229	22.1363	20.5112	26.783
ENSGALG00000000215	8.85482	7.95041	6.78105	8.04557	7.5066	10.2596
ENSGALG00000000217	0.313412	0.255364	0.309572	0.218867	0.350859	0.198447
ENSGALG00000000218	16.8242	18.501	17.7822	18.3308	19.2497	22.7625
ENSGALG00000000220	6.34835	6.90003	5.16016	5.80163	5.57099	5.42599
ENSGALG00000000223	23.8437	27.5646	31.1891	29.2297	32.124	34.4646
ENSGALG00000000225	1.05787	1.30679	1.60191	1.54899	1.3028	2.83148
ENSGALG00000000226	2.49895	3.17269	2.23749	2.83597	3.76607	2.47144
ENSGALG00000000227	18.8502	19.1017	19.9951	16.9023	22.0473	25.6375
ENSGALG00000000233	4.29537	5.99744	4.69358	6.17854	6.19793	5.39399
ENSGALG00000000234	1.26952	1.16654	1.40073	0.606087	1.70329	2.00593
ENSGALG00000000235	30.3699	33.7179	37.9521	31.5289	36.3943	65.6439
ENSGALG00000000241	6.80035	4.95427	4.00914	3.59877	6.9371	2.8919
ENSGALG00000000242	0.254705	0.820759	1.31097	0.131612	0.98472	8.02355
ENSGALG00000000243	13.1867	11.3825	11.8772	12.4847	11.1832	10.0592
ENSGALG00000000244	2.89052	2.00619	3.09488	1.62591	2.36326	1.75555
ENSGALG00000000247	10.8831	10.7561	10.0735	10.5645	11.2466	13.7145
ENSGALG00000000251	0.157811	0.11819	0.11143	0.0773242	0.162561	0.1888
ENSGALG00000000253	9.1164	9.01709	9.37164	9.20836	9.26841	11.2444
ENSGALG00000000255	21.5712	19.4374	16.7293	16.2655	17.4279	8.19161
ENSGALG00000000259	25.4501	24.1081	24.4666	24.7463	30.9522	36.8022
ENSGALG00000000264	15.1921	12.999	13.7281	11.6257	13.5547	11.8183
ENSGALG00000000273	5.3541	5.26172	3.84756	3.79315	4.53365	2.93427
ENSGALG00000000275	9.2371	11.3111	12.7247	10.5479	11.7927	17.1365
ENSGALG00000000276	6.80211	6.6008	6.66077	5.56049	4.66303	3.96121
ENSGALG00000000277	0.0855721	0.083053	0.175855	0.108638	0.0851753	0.120128
ENSGALG00000000280	1.6525	3.81175	3.7976	3.02678	3.94088	4.44428
ENSGALG00000000284	14.6061	17.6535	22.8251	15.8584	16.7183	8.61316
ENSGALG00000000293	0.0787175	0.121084	0.0332453	0.206441	0.129547	0.0462245
ENSGALG00000000295	0.0585735	0.116994	0.140923	0.0500592	0.103142	0.482469
ENSGALG00000000296	12.583	12.4302	10.0225	10.8613	10.1501	11.0834
ENSGALG00000000299	1.95664	3.625	4.75188	0.605303	4.06249	15.7593
ENSGALG00000000309	0.0692671	0.0202753	0.0918613	0.0307635	0.0897341	0.144355
ENSGALG00000000311	5.01589	5.47503	3.38417	3.95805	4.44072	3.57524
ENSGALG00000000313	0.391225	0.810498	0.50118	0.838261	0.631488	0.136196
ENSGALG00000000314	25.9118	31.3937	42.2613	32.9413	42.4057	132.52
ENSGALG00000000317	3.06257	2.53522	6.51461	1.91206	3.34302	32.0559
ENSGALG00000000318	104.81	108.666	96.4563	98.1092	112.14	107.79
ENSGALG00000000329	17.7369	22.1847	18.1554	21.2551	19.4413	20.8705
ENSGALG00000000336	31.1542	34.4144	31.4839	30.6484	30.8944	40.4914
ENSGALG00000000337	0	3.621	0	0	3.74058	0
ENSGALG00000000349	47.2599	47.6488	48.7399	63.4131	52.6838	52.6885
ENSGALG00000000352	10.3067	11.5056	11.554	12.0911	12.3896	14.484
ENSGALG00000000357	0.632734	0.481275	0.670815	0.592319	0.292861	0.40659
ENSGALG00000000364	3.76545	3.46848	1.6347	2.25682	1.85988	1.70389
ENSGALG00000000371	0.15143	0.181157	0.200936	0.132645	0.23609	3.4676
ENSGALG00000000374	9.44445	10.1474	12.8287	11.5936	12.7648	13.2155
ENSGALG00000000377	52.0565	53.8278	54.223	57.7628	60.3101	43.9738
ENSGALG00000000378	4.19339	4.28194	3.05622	3.70843	3.24017	4.25156
ENSGALG00000000379	2.83422	2.4599	2.35864	1.64455	2.80063	7.54702
ENSGALG00000000390	9.28924	10.6413	11.1196	10.7145	12.045	21.0573
ENSGALG00000000394	0.942068	0.977355	2.27225	0.431619	1.50208	11.2792
ENSGALG00000000396	12.3973	13.4312	12.9313	12.9169	13.478	18.4671
ENSGALG00000000397	21.7154	19.7308	20.6399	22.5167	24.3114	29.8672
ENSGALG00000000399	0.553998	0.437616	0.189537	0.249044	0.132108	0.0686532
ENSGALG00000000400	0.468492	0.452545	0.322864	0.355914	0.388305	1.23776
ENSGALG00000000401	3.10464	3.07395	3.37466	3.18042	3.91859	4.81749
ENSGALG00000000402	15.1982	20.2378	19.3667	10.9712	16.8616	11.6867
ENSGALG00000000404	24.4989	29.8953	27.7814	23.0153	27.5104	36.0205
ENSGALG00000000407	9.10868	7.43557	8.42707	9.59062	11.3488	11.9423
ENSGALG00000000409	63.4414	66.0564	68.9911	71.0481	72.9039	106.047
ENSGALG00000000410	8.8944	10.0101	9.74017	9.15106	10.5457	21.4979
ENSGALG00000000417	2.15877	2.42295	3.28825	2.34483	2.13742	1.80573
ENSGALG00000000419	69.2413	73.1814	82.3659	83.5873	81.9509	89.7023
ENSGALG00000000424	69.9546	66.8244	59.6228	64.9838	70.8629	52.9545
ENSGALG00000000430	7.54367	7.748	6.11254	5.8467	6.94936	3.13312
ENSGALG00000000433	0.413621	0.554185	0.687653	0.530511	0.433276	2.31191
ENSGALG00000000436	14.4392	14.3027	12.0886	20.263	14.6103	23.4712
ENSGALG00000000438	7.36765	7.79457	7.78187	6.8321	8.62083	12.7737
ENSGALG00000000441	0.124409	0.144279	0.157047	0.411285	0.254867	0.724736
ENSGALG00000000442	5.53346	4.90283	7.10394	5.80087	6.62911	8.15288
ENSGALG00000000451	1.12877	1.54236	1.94087	1.80494	1.91163	6.77644
ENSGALG00000000452	3.39266	4.58594	3.85327	3.01246	2.19891	2.21847
ENSGALG00000000458	1.01393	0.252177	0.536495	0.457449	0.930691	0.351957
ENSGALG00000000461	32.6768	34.5911	41.9142	29.3511	46.6537	31.6795
ENSGALG00000000466	0.249245	0.30126	0.660685	0.409011	0.286967	0.275849
ENSGALG00000000470	39.7616	45.6541	31.8958	34.3569	44.6403	21.9167
ENSGALG00000000474	400.686	398.452	360.669	353.146	363.403	346.544
ENSGALG00000000476	0.437847	0.170761	0.333335	0.171447	0.407289	0.823786
ENSGALG00000000478	2.82983	2.20071	2.52379	1.97777	2.61813	4.07913
ENSGALG00000000497	5.2171	4.29474	3.7062	7.15863	1.95964	1.41876
ENSGALG00000000498	1.96542	3.09783	2.98672	2.50541	1.89641	3.7088
ENSGALG00000000504	1.0233	1.02727	1.23187	0.741302	1.01752	1.77801
ENSGALG00000000505	0.0472338	0.124077	0.0904691	0.0746587	0.0586234	0.405047
ENSGALG00000000507	0.0513177	0.0492117	0.0547095	0.0908566	0.186838	0.0771767
ENSGALG00000000510	9.88444	10.9656	9.64541	9.31692	9.61161	14.9211
ENSGALG00000000511	17.3961	17.9542	21.0363	14.8259	18.9954	47.0403
ENSGALG00000000513	6.13236	7.80731	8.29339	7.86542	9.52654	10.2025
ENSGALG00000000516	1.7586	1.92054	2.12644	2.21365	3.03982	4.19368
ENSGALG00000000518	11.6402	11.5425	11.3192	14.5867	14.1303	17.5942
ENSGALG00000000521	0.322424	0.13446	0.238497	0.144405	0.276605	0.355643
ENSGALG00000000523	11.5087	12.931	14.0486	10.0971	11.8181	22.0571
ENSGALG00000000525	12.0292	12.4838	13.0334	10.0216	12.1616	14.6989
ENSGALG00000000528	9.27291	11.9087	12.0905	12.2772	9.96313	15.7721
ENSGALG00000000529	29.5487	32.1505	23.7432	29.9716	35.3298	18.4156
ENSGALG00000000533	126.319	114.435	103.644	140.613	137.042	113.199
ENSGALG00000000535	9.12841	10.4782	10.9356	10.3538	11.4492	20.584
ENSGALG00000000538	8.03179	9.25019	10.7187	8.80257	8.79245	12.6527
ENSGALG00000000540	3.51262	4.10453	4.13383	4.02577	3.72767	6.713
ENSGALG00000000541	20.0777	19.9158	23.8606	20.635	20.5691	25.9075
ENSGALG00000000542	134.239	134.915	132.14	127.406	116.337	130.531
ENSGALG00000000544	0.0504552	0.140957	0.21431	0.0293523	0.064363	1.06712
ENSGALG00000000545	0.348386	0.158422	0.849859	0.359905	0.789387	6.96005
ENSGALG00000000549	0.399915	0.935803	0.727669	0.96681	1.00103	0.145701
ENSGALG00000000550	16.9088	18.0476	19.1144	20.4823	21.3148	24.8574
ENSGALG00000000551	16.7453	14.5141	16.3116	16.3913	17.9152	31.8445
ENSGALG00000000556	0	0.144536	0.147429	0	0.142742	0.693602
ENSGALG00000000557	0.731412	0.940001	0.410183	1.42612	0.912905	1.31029
ENSGALG00000000558	10.174	9.44514	7.31501	11.4805	9.99051	5.20268
ENSGALG00000000560	0.137477	0.363534	0.230231	0.152802	0.155646	0.163889
ENSGALG00000000564	14.2511	12.8758	14.6217	14.3219	14.5067	12.5772
ENSGALG00000000573	1.62121	1.57979	1.71834	1.55551	2.01426	1.39837
ENSGALG00000000576	2.11977	2.81139	2.45536	2.42376	3.02376	4.00739
ENSGALG00000000577	17.274	18.8507	20.0151	17.8838	19.1778	33.3049
ENSGALG00000000579	130.775	145.656	145.177	162.572	158.907	190.627
ENSGALG00000000581	22.4756	22.7244	23.4652	22.995	22.9024	24.6756
ENSGALG00000000583	0.61354	0.797964	1.12481	1.24136	0.993307	0.643266
ENSGALG00000000584	1.23592	1.11535	2.2251	1.80431	1.45987	1.47422
ENSGALG00000000585	3.99469	4.49279	3.51461	2.49211	3.30637	4.28969
ENSGALG00000000589	1.21201	1.11491	0.938217	0.868994	0.851271	0.797182
ENSGALG00000000596	26.7031	30.945	29.2827	28.1783	31.6466	67.2943
ENSGALG00000000599	9.23654	13.6668	13.7581	12.8288	11.2523	22.0639
ENSGALG00000000603	10.4636	11.7624	11.9146	9.60135	10.8738	15.2567
ENSGALG00000000604	1.11643	1.1478	1.01937	1.07527	1.42027	2.28694
ENSGALG00000000606	13.241	14.0565	14.0111	14.5609	14.7832	15.5608
ENSGALG00000000607	0.669358	0.645445	0.866639	0.624424	1.07725	4.38841
ENSGALG00000000608	0.943568	0.935563	1.01287	0.461654	0.846713	0.843774
ENSGALG00000000611	15.2376	15.131	14.5551	14.5956	15.5027	24.0907
ENSGALG00000000613	99.6332	103.318	127.178	95.1063	123.793	198.873
ENSGALG00000000615	21.1855	20.8053	21.2196	25.8469	29.9129	33.0806
ENSGALG00000000616	4.11313	6.22474	11.0184	2.02132	3.67189	4.59225
ENSGALG00000000618	13.7824	15.5488	14.31	15.7781	17.6959	35.4355
ENSGALG00000000619	15.1697	21.4483	21.6044	10.3363	17.6185	9.51795
ENSGALG00000000621	21.5192	21.9362	26.1182	20.3456	20.9546	19.1778
ENSGALG00000000625	6.28751	7.45609	8.16236	8.05158	8.02093	7.77597
ENSGALG00000000627	18.016	18.149	28.1944	22.9408	23.5376	67.3173
ENSGALG00000000629	84.5718	86.5963	74.872	88.99	74.7209	73.1932
ENSGALG00000000632	24.9603	27.0546	27.6168	31.557	35.9098	34.559
ENSGALG00000000636	22.5148	23.385	22.3052	22.8427	21.228	34.8933
ENSGALG00000000637	5.12483	6.28332	6.97889	6.0121	7.28261	11.6318
ENSGALG00000000638	16.5132	20.3628	18.9059	20.2636	20.7202	20.4517
ENSGALG00000000639	0.115891	0.0446703	0.0247058	0.0205619	0.12055	0.571152
ENSGALG00000000643	3.49018	3.07912	3.40385	2.98573	3.92115	3.38063
ENSGALG00000000645	0	0.223726	0.15094	0.289022	0.0494804	0.0958204
ENSGALG00000000650	53.6923	57.041	44.9358	61.6276	64.0217	67.0207
ENSGALG00000000652	8.98975	12.4386	13.7601	17.0881	14.4791	14.3226
ENSGALG00000000654	0.0669145	0.197696	0.988193	0.53222	0.758174	0.540318
ENSGALG00000000657	24.0011	26.3759	27.1661	29.5921	31.2817	45.963
ENSGALG00000000660	66.6322	68.2407	69.2154	73.8397	75.2916	97.5208
ENSGALG00000000667	15.4327	3.02618	7.1735	5.1171	4.85811	15.6768
ENSGALG00000000668	20.2803	22.4143	25.076	23.9418	25.6865	33.3887
ENSGALG00000000669	21.2931	21.9497	21.8602	19.0055	20.382	17.5411
ENSGALG00000000672	4.87181	6.8708	7.25665	6.50147	6.67473	7.36706
ENSGALG00000000674	5.73573	6.55467	6.03299	5.69231	6.12826	6.25884
ENSGALG00000000678	45.5644	57.4036	58.3558	58.4946	51.3819	130.65
ENSGALG00000000681	13.9591	11.9605	9.01037	15.8216	11.9017	18.2374
ENSGALG00000000684	4.11409	3.09745	3.05425	3.13933	3.27541	15.7314
ENSGALG00000000685	4.53351	4.37239	4.76951	4.98255	4.96856	5.02906
ENSGALG00000000690	0.369503	0.447157	0.43666	1.20738	0.521273	0.397484
ENSGALG00000000692	2.81907	3.87118	2.76379	2.95045	2.92254	3.98893
ENSGALG00000000693	22.3346	26.8544	22.5352	31.7823	27.3642	34.4916
ENSGALG00000000695	1.95486	1.7473	2.48793	2.04568	1.76115	2.04009
ENSGALG00000000699	12.4836	12.1722	13.822	13.8656	12.9897	29.3498
ENSGALG00000000703	6.39409	8.25733	8.60476	7.40765	7.3046	8.08632
ENSGALG00000000707	52.3059	54.1169	52.8872	65.7208	64.8624	62.5897
ENSGALG00000000708	39.39	44.7127	40.374	39.7972	49.6593	36.998
ENSGALG00000000712	13.0331	13.0872	16.5542	12.6542	12.6775	25.7323
ENSGALG00000000713	2.77811	3.55998	3.08668	2.67605	2.93943	1.76358
ENSGALG00000000719	273.156	247.717	241.29	281.051	247.931	195.459
ENSGALG00000000720	4.48958	4.24838	5.07592	5.56978	5.78482	3.94944
ENSGALG00000000721	6.04883	6.90794	7.65975	6.27203	8.3397	20.2907
ENSGALG00000000723	30.8361	33.4835	40.8106	34.6219	38.118	64.9342
ENSGALG00000000724	20.7851	19.1238	24.0255	20.6622	21.9875	25.3864
ENSGALG00000000726	58.2401	58.0596	53.2422	54.8871	58.865	50.6125
ENSGALG00000000729	8.00092	10.1788	7.88077	9.25408	7.5331	7.18699
ENSGALG00000000731	0.681822	0.407079	0.519962	0.551411	0.439315	0.449147
ENSGALG00000000734	37.9518	37.7513	35.0973	40.65	43.9853	48.8873
ENSGALG00000000736	0.814499	0.769014	0.433594	0.576722	0.406606	1.12319
ENSGALG00000000737	7.45862	5.89743	6.015	7.98277	6.63832	6.01206
ENSGALG00000000740	6.19318	7.7756	7.66925	7.59308	7.96634	12.4612
ENSGALG00000000747	1.95156	2.07743	1.98621	1.74475	1.58897	1.34482
ENSGALG00000000748	1.16643	1.2689	1.80366	1.16544	1.16103	1.19744
ENSGALG00000000751	26.7802	33.7698	37.0437	32.4398	35.3582	40.0826
ENSGALG00000000755	18.7659	22.6799	13.9146	13.9075	18.6406	10.9762
ENSGALG00000000761	5.12456	4.84435	5.76769	4.82348	6.41991	5.73217
ENSGALG00000000764	129.411	130.26	125.086	171.352	150.662	113.348
ENSGALG00000000769	1.4247	1.10225	2.22951	1.65854	1.68199	2.30443
ENSGALG00000000775	32.2628	42.1952	53.2668	28.4917	23.8464	24.0616
ENSGALG00000000776	13.2167	12.5895	13.621	12.2914	12.4074	14.8123
ENSGALG00000000777	14.7983	15.9036	15.634	17.4234	18.7773	19.0375
ENSGALG00000000783	1.9799	1.90962	1.52851	1.8177	1.10054	1.64456
ENSGALG00000000784	18.8346	20.6208	19.8268	19.5221	20.9998	26.9532
ENSGALG00000000785	10.4439	12.4412	10.8116	11.055	10.4468	10.0647
ENSGALG00000000787	13.0631	13.3142	15.1058	15.0954	15.344	16.7127
ENSGALG00000000788	0.109042	0	0.0591351	0	0.116862	1.07603
ENSGALG00000000790	48.6433	51.2114	53.7714	52.9864	52.5413	70.2137
ENSGALG00000000791	9.73907	12.5663	14.2758	13.6547	18.5948	14.9929
ENSGALG00000000793	42.5977	48.8776	42.873	56.694	56.4433	67.3498
ENSGALG00000000795	28.5557	31.778	37.0088	42.3414	32.6174	30.8298
ENSGALG00000000802	11.2255	9.28498	9.94124	14.2508	16.477	17.7277
ENSGALG00000000803	10.7653	17.4386	26.7792	13.4487	18.2856	130.73
ENSGALG00000000811	41.8387	38.7985	44.2822	46.9195	43.0937	51.1719
ENSGALG00000000812	527.928	546.687	520.41	554.631	589.196	470.354
ENSGALG00000000814	49.2869	50.509	47.8755	50.1248	50.4561	38.7162
ENSGALG00000000816	3.31896	3.63876	4.66763	3.38626	4.43071	7.01557
ENSGALG00000000817	16.9326	20.3514	20.0833	22.8975	16.4286	14.0184
ENSGALG00000000818	14.0439	11.7947	8.17541	7.55643	7.88177	5.51274
ENSGALG00000000820	1.27691	0.865516	1.59149	0.879231	0.736374	1.06622
ENSGALG00000000824	2.87311	3.71975	8.49826	3.13485	4.28995	44.593
ENSGALG00000000830	0.853274	0.600717	0.64586	0.592998	0.469371	1.16805
ENSGALG00000000835	34.22	41.8006	39.0694	38.8881	49.8799	81.653
ENSGALG00000000836	0.610367	0.0738577	0.659089	0.270802	0.242756	0.39621
ENSGALG00000000838	3.1637	3.3984	3.52425	3.46256	3.81052	6.32423
ENSGALG00000000843	4.81829	5.85543	5.1331	4.63612	5.69842	4.60762
ENSGALG00000000845	9.04148	8.30885	9.51404	8.6628	10.3203	21.0903
ENSGALG00000000847	16.8029	17.2119	17.1967	16.1969	18.5397	14.9943
ENSGALG00000000848	35.566	35.1248	38.8546	30.2941	39.7417	65.6157
ENSGALG00000000853	8.32936	5.90609	7.76123	7.53019	7.06447	6.58766
ENSGALG00000000855	27.266	25.7077	26.0894	26.504	28.1377	29.4888
ENSGALG00000000856	12.5689	12.8583	13.5932	13.9991	13.6087	15.9221
ENSGALG00000000857	16.2889	19.0954	18.0842	22.7735	22.1727	24.765
ENSGALG00000000862	5.5541	6.81508	6.52435	6.07099	5.53155	13.3463
ENSGALG00000000863	3.21556	2.99372	4.71522	2.89923	3.13208	4.64437
ENSGALG00000000864	11.9013	12.5453	13.3189	12.2239	12.665	11.1838
ENSGALG00000000866	13.9886	15.5593	23.0081	12.1665	13.9988	11.6866
ENSGALG00000000868	17.4237	16.6033	15.4724	18.0508	15.3071	16.8729
ENSGALG00000000870	1.38984	1.71541	2.04669	1.31477	2.06204	3.57123
ENSGALG00000000871	0.123678	0	0.0656504	0.0546411	0.255607	0
ENSGALG00000000875	10.3027	10.044	10.3639	9.36179	11.3933	12.008
ENSGALG00000000881	4.03412	4.53749	4.44519	5.4879	5.59786	10.591
ENSGALG00000000883	41.7689	33.9273	37.5574	29.1497	35.6027	26.3963
ENSGALG00000000884	16.7802	19.1321	17.5509	19.5864	20.1501	17.7984
ENSGALG00000000887	0.168687	0.353833	0.15274	0.166757	0.222924	0.613431
ENSGALG00000000891	8.77055	10.6075	10.0618	13.83	11.7521	16.9454
ENSGALG00000000892	0	0.132596	0	0	0	0.267291
ENSGALG00000000893	0.597813	0.706711	2.38582	0.657774	1.46772	11.8971
ENSGALG00000000895	70.6332	71.5303	83.4347	95.4635	88.5192	103.369
ENSGALG00000000901	0.330101	0.460524	1.13051	0.244342	1.33939	7.03977
ENSGALG00000000902	3.75376	6.25776	6.37725	6.97559	6.78348	20.4482
ENSGALG00000000903	27.8421	29.8007	25.1407	27.5774	28.8852	25.3016
ENSGALG00000000905	148.504	175.579	165.053	204.314	187.834	174.228
ENSGALG00000000906	3.44741	3.06663	2.74823	3.08805	2.57845	4.64749
ENSGALG00000000907	79.9518	78.0934	75.8466	75.436	77.728	75.2978
ENSGALG00000000908	10.5329	9.81919	10.5247	9.10876	9.51242	6.85699
ENSGALG00000000909	0.230859	0.254901	0.263953	0.161821	0.25868	0.0678646
ENSGALG00000000911	0.0621146	0.0302366	0	0.026457	0	0.624593
ENSGALG00000000913	15.0178	14.496	13.1832	15.6913	13.8714	14.6686
ENSGALG00000000918	0.941742	0.555618	0.579761	0.577477	1.48664	0.797918
ENSGALG00000000920	0.642093	1.44103	1.75635	1.26915	1.2822	3.80086
ENSGALG00000000927	17.3461	13.6494	16.5572	5.63147	9.22211	11.6949
ENSGALG00000000934	5.91916	5.83056	5.48421	4.67843	4.87185	6.31593
ENSGALG00000000943	19.0935	23.4119	23.465	21.9974	28.6229	38.8418
ENSGALG00000000944	74.86	67.8787	55.94	72.0081	67.2939	63.9391
ENSGALG00000000946	103.61	100.836	87.0761	103.101	86.6189	85.4934
ENSGALG00000000949	4.79888	5.84732	5.07805	4.54442	4.34547	13.4519
ENSGALG00000000950	15.2342	14.7966	17.3693	18.1894	16.3101	18.4763
ENSGALG00000000955	26.2838	29.1252	31.5389	31.3043	33.3672	54.942
ENSGALG00000000962	6.75319	6.52917	7.08237	7.13712	7.2163	9.36338
ENSGALG00000000966	2.26224	2.83428	3.07085	2.98783	2.35576	4.86264
ENSGALG00000000972	11.2891	12.6371	15.5257	11.7119	11.6724	9.59492
ENSGALG00000000975	15.3474	13.3791	15.3888	16.089	17.4945	21.3429
ENSGALG00000000977	8.98365	9.78512	9.5982	9.79503	10.1623	11.0505
ENSGALG00000000978	6.21673	7.5064	8.33394	6.86622	6.69372	7.18527
ENSGALG00000000988	40.9514	41.871	40.8377	36.9594	37.9738	43.3343
ENSGALG00000000990	166.71	159.34	161.413	170.542	160.774	110.934
ENSGALG00000000991	32.8072	36.4572	37.1967	40.6061	37.6035	45.1439
ENSGALG00000000993	15.7547	16.9767	18.6449	16.6797	15.211	25.2199
ENSGALG00000000994	0	0.461353	0	0.105759	0.884032	0.503074
ENSGALG00000000996	18.5715	21.3789	19.9573	17.6964	20.7504	34.6718
ENSGALG00000000997	8.93791	8.54846	8.3016	8.73341	8.15855	12.2195
ENSGALG00000000998	20.0831	21.8157	22.2695	24.7992	25.732	35.1667
ENSGALG00000000999	16.018	11.8529	12.0043	15.7709	18.1639	17.4271
ENSGALG00000001000	255.922	277.253	481.753	437.614	331.441	281.215
ENSGALG00000001003	36.4685	30.825	36.3429	34.6391	33.9205	27.182
ENSGALG00000001006	2.04227	2.57769	2.98324	2.86245	3.87483	11.5134
ENSGALG00000001013	18.3312	21.4122	19.2433	21.6806	23.4316	27.8335
ENSGALG00000001014	13.2333	14.3349	14.2178	14.3747	14.2418	20.9398
ENSGALG00000001017	9.96153	12.405	11.4011	11.3048	14.622	44.9947
ENSGALG00000001019	16.4899	22.9573	22.844	22.3159	22.7001	39.1758
ENSGALG00000001021	6.93018	6.90275	7.48195	6.13359	6.20134	4.35009
ENSGALG00000001022	11.3268	13.4199	13.7484	13.1879	13.7535	20.9981
ENSGALG00000001024	96.2737	101.738	106.261	113.457	111.836	156.328
ENSGALG00000001025	7.4728	8.0193	5.06186	6.81305	6.73092	4.25861
ENSGALG00000001028	0.884011	0.661231	0.666948	0.582506	0.434505	0.70676
ENSGALG00000001030	54.9887	58.2121	49.5304	55.1027	60.1513	58.2406
ENSGALG00000001031	0.0866761	0.101013	0.197221	0.0875235	0.104596	0.293077
ENSGALG00000001034	24.1912	22.945	20.6199	23.5978	25.2291	31.7198
ENSGALG00000001035	0.122053	0.197018	0.262393	0.253033	0.128435	0.53693
ENSGALG00000001036	8.88991	9.53289	9.08413	10.1021	10.0857	14.2871
ENSGALG00000001037	4.90068	4.7983	4.44117	4.37548	4.77261	8.17582
ENSGALG00000001038	13.0901	15.1618	14.8913	12.6968	14.3625	14.914
ENSGALG00000001042	11.924	15.7658	15.3956	15.2039	13.9881	15.7698
ENSGALG00000001043	8.34396	8.98888	10.1746	8.59407	10.3976	23.5694
ENSGALG00000001046	27.4295	30.2855	29.891	31.9213	36.9637	57.5683
ENSGALG00000001048	13.2217	14.7304	14.7312	12.8203	14.5962	13.292
ENSGALG00000001049	7.61005	7.64757	8.50796	7.6722	8.00034	6.2127
ENSGALG00000001051	23.7751	29.5608	28.4022	26.7243	25.8343	27.7097
ENSGALG00000001054	30.0418	31.5746	31.5079	34.1131	35.9573	42.371
ENSGALG00000001055	20.7682	20.435	23.7734	19.359	22.7968	23.1252
ENSGALG00000001056	1.77954	2.74769	5.27828	3.09572	5.56188	5.55957
ENSGALG00000001058	2.50366	2.28879	2.41836	2.85251	2.9089	4.75413
ENSGALG00000001062	0.341044	0.613002	0.989521	0.617124	0.977549	1.26088
ENSGALG00000001067	11.0901	11.8283	11.6335	11.636	11.3235	12.5123
ENSGALG00000001073	2.03435	2.63205	1.84372	2.32946	2.13031	3.5947
ENSGALG00000001076	6.0325	7.62497	8.74553	8.61194	7.29086	11.5631
ENSGALG00000001080	43.9227	40.7137	27.6936	37.5206	39.9064	26.9887
ENSGALG00000001084	0.964516	0.738962	0.926741	0.721749	0.217721	0.142007
ENSGALG00000001091	0.603381	0.117077	0.64351	0.318983	0.25106	0.321747
ENSGALG00000001093	19.5673	21.0246	19.1193	17.5997	19.0273	12.8068
ENSGALG00000001094	0.304507	0.451558	0.399555	0.555919	0.526863	0.734522
ENSGALG00000001096	71.2514	81.6078	60.605	84.7535	76.5821	77.6614
ENSGALG00000001099	10.3594	10.5333	11.9601	10.1948	11.9271	18.4419
ENSGALG00000001101	27.6332	29.8451	28.3118	31.4307	30.2571	15.4022
ENSGALG00000001103	80.1475	70.9563	74.4918	82.9908	80.0193	77.1129
ENSGALG00000001107	16.5513	17.526	17.388	18.036	16.5706	15.5793
ENSGALG00000001108	4.17288	4.74407	4.03527	4.26783	5.05042	7.84898
ENSGALG00000001109	10.0229	19.8734	13.3537	7.05817	15.0457	32.9633
ENSGALG00000001110	6.64855	8.29449	8.13226	8.92151	8.0976	11.5821
ENSGALG00000001111	0.098022	0.118187	0.128521	0.0741202	0.0749273	0.130671
ENSGALG00000001115	17.88	7.10505	4.75238	13.3642	4.53407	4.24815
ENSGALG00000001117	3.61932	3.95647	3.20366	4.45056	4.14184	4.3906
ENSGALG00000001118	43.0734	44.9726	39.722	50.0895	51.1598	29.6871
ENSGALG00000001121	20.5553	25.9861	23.8304	21.5566	22.8492	26.566
ENSGALG00000001122	0.272018	0.111665	0.123952	0.16939	0	0.0776563
ENSGALG00000001124	0.269167	0.129955	0.105753	0.0582381	0.171142	0.0654401
ENSGALG00000001126	6.33639	7.0059	7.10569	7.67968	7.77576	21.4222
ENSGALG00000001130	7.57176	7.24562	14.496	9.39497	19.6028	18.77
ENSGALG00000001136	0.837669	0.891343	1.45425	1.56359	0.917716	0.896351
ENSGALG00000001141	0.105326	0.0679963	0.0367594	0.181236	0.356537	0.13305
ENSGALG00000001143	11.9442	11.2442	12.3792	13.2587	14.494	9.84935
ENSGALG00000001144	3.04568	3.28913	3.74197	3.4077	3.09569	6.13039
ENSGALG00000001146	9.34103	10.8571	12.5423	10.1873	12.6158	21.3044
ENSGALG00000001149	0.0734409	0.0883913	0.138338	0.0651565	0.13624	0.151119
ENSGALG00000001153	2.91085	2.67173	3.44447	2.75594	3.48798	2.9613
ENSGALG00000001157	13.5081	13.5607	11.4638	12.4685	12.7893	11.8137
ENSGALG00000001158	5.58455	6.04972	6.2073	4.99391	5.44417	6.61116
ENSGALG00000001161	7.22956	5.74239	9.43203	6.97889	7.1063	5.33898
ENSGALG00000001163	13.0383	12.7874	15.999	13.2303	16.5441	27.8243
ENSGALG00000001165	5.47865	5.11638	4.33912	5.01503	5.17844	5.24643
ENSGALG00000001168	31.2769	26.0802	32.0238	40.81	37.1047	37.9152
ENSGALG00000001169	13.1402	13.7067	9.573	10.0337	9.76894	8.00309
ENSGALG00000001171	1.54357	0.781439	1.52644	1.26449	1.49958	7.60365
ENSGALG00000001172	0.0951405	0.0415267	0.0491683	0.294594	0.0979858	0.0521274
ENSGALG00000001174	6.97665	7.37271	6.94777	7.23449	7.71653	16.8691
ENSGALG00000001175	55.0746	41.1006	47.2215	43.4085	39.7823	40.671
ENSGALG00000001177	31.9928	33.7871	33.6542	25.5922	36.7415	23.9979
ENSGALG00000001181	0.696074	1.25541	1.33738	2.04144	1.90941	1.82717
ENSGALG00000001182	8.21695	9.09353	7.6189	6.88914	7.86568	7.9628
ENSGALG00000001183	59.0359	58.0126	58.1057	50.1961	61.3827	58.3767
ENSGALG00000001184	40.9886	36.2495	36.8	48.2944	39.792	34.9642
ENSGALG00000001189	0.886105	1.17251	1.65118	0.495573	0.484954	0.711741
ENSGALG00000001191	0.196339	0.0377741	0.144556	0.0342188	0.0801603	0.0949258
ENSGALG00000001201	18.4377	19.8805	21.4781	18.5696	22.8706	32.6981
ENSGALG00000001203	0.624283	0.0754562	0.248569	0.135399	0	0.840659
ENSGALG00000001204	7.31488	7.53135	6.84432	8.63029	8.62202	13.74
ENSGALG00000001206	2.50855	1.5267	3.47209	0.694748	2.14993	20.4991
ENSGALG00000001207	0.494995	0.356183	0.197416	1.47129	0.374595	0.293552
ENSGALG00000001209	0	0	0.251891	0.354601	0	0.207108
ENSGALG00000001214	0.300803	1.15874	0.516958	0.272322	0.69349	0.993399
ENSGALG00000001219	13.2108	11.3418	11.8297	10.7459	10.1962	15.7877
ENSGALG00000001220	14.2377	17.2894	27.7992	20.7511	22.0567	24.4683
ENSGALG00000001223	17.4822	18.5195	19.1632	23.1481	20.9726	24.6221
ENSGALG00000001225	16.992	17.665	15.7773	17.5392	17.8591	17.0617
ENSGALG00000001229	9.56025	9.80459	9.47674	7.01359	7.80245	6.22902
ENSGALG00000001231	8.87992	8.851	9.13741	7.91021	8.63619	8.86981
ENSGALG00000001235	0.0743142	0.059527	0.158639	0.0773159	0.0649078	1.04515
ENSGALG00000001238	22.9048	23.6917	19.6133	27.132	28.2574	30.2477
ENSGALG00000001239	2.59648	2.25516	1.41206	2.38971	2.68602	3.94375
ENSGALG00000001244	2.1159	0.635871	1.85732	2.419	4.60957	8.60416
ENSGALG00000001245	11.6832	12.2422	12.6065	12.3255	12.051	19.8082
ENSGALG00000001250	294.67	274.998	268.886	254.233	265.016	180.226
ENSGALG00000001252	0.0188989	0.173434	0.0573675	0.0633436	0.136327	0.0897723
ENSGALG00000001253	13.0108	15.3718	9.2527	11.8023	10.8055	5.99644
ENSGALG00000001256	1.4848	1.47001	1.47925	1.12626	1.27632	0.811174
ENSGALG00000001258	28.243	30.4221	27.9969	33.7208	27.7884	22.0529
ENSGALG00000001262	51.5302	49.0708	60.7458	45.5822	55.2708	64.2334
ENSGALG00000001263	0.556251	0.716611	0.842783	0.558213	1.1374	0.447618
ENSGALG00000001264	5.25723	5.50415	6.07446	5.29606	6.36593	4.1149
ENSGALG00000001267	18.6915	19.7481	20.8753	19.8115	23.5407	42.3908
ENSGALG00000001270	3.57808	5.19199	5.14722	4.46458	5.11461	11.7965
ENSGALG00000001273	0.474462	0.153466	0.291041	0	0.630753	7.29816
ENSGALG00000001275	26.9985	25.5037	31.6791	27.2239	29.4978	31.9194
ENSGALG00000001276	1.31284	1.29897	2.58467	0.48105	1.18436	1.06511
ENSGALG00000001279	9.33132	9.79155	9.7497	7.79089	9.75225	9.60053
ENSGALG00000001282	1.11648	1.68773	1.02759	1.756	1.18182	0.793063
ENSGALG00000001283	40.1414	41.7296	41.6428	40.8571	39.1535	28.101
ENSGALG00000001288	0.898054	1.24714	2.08241	1.25916	1.35558	4.96156
ENSGALG00000001289	1.48331	1.56459	1.73326	1.58576	1.50234	3.34335
ENSGALG00000001304	3.19913	2.93572	2.73938	4.34708	3.37787	3.57172
ENSGALG00000001306	6.97307	7.47536	8.04556	7.44163	7.35314	7.54419
ENSGALG00000001309	12.4879	12.9427	12.1976	13.57	12.182	29.9338
ENSGALG00000001310	2.93371	2.99413	2.15014	2.67657	2.53221	3.56049
ENSGALG00000001311	1.42145	1.49437	1.30629	1.72621	2.08812	4.48862
ENSGALG00000001313	111.661	122.387	120.07	124.069	128.92	154.906
ENSGALG00000001314	14.2138	9.28576	10.034	10.8328	12.387	6.77334
ENSGALG00000001315	6.74414	5.14065	8.38034	4.93125	7.7956	9.88945
ENSGALG00000001316	8.19281	6.19239	7.92457	6.83121	7.34613	13.6399
ENSGALG00000001317	28.6817	30.4282	38.4675	33.9092	36.711	70.6183
ENSGALG00000001319	0.443713	0.307761	0.485308	0.460658	0.279104	2.56438
ENSGALG00000001325	0.0689545	0.0440588	0.0737265	0.0406481	0.047905	0.779397
ENSGALG00000001328	163.335	177.099	180.181	181.029	170.4	152.736
ENSGALG00000001329	2.34393	2.53555	2.70973	2.21937	2.38591	2.82701
ENSGALG00000001330	87.7092	97.7232	89.1436	101.164	103.798	79.3786
ENSGALG00000001331	5.38284	9.98484	7.48654	7.70404	8.82011	21.215
ENSGALG00000001332	4.34099	4.56772	3.83686	4.80976	5.85936	5.64419
ENSGALG00000001333	18.6628	17.9463	18.8537	20.2655	17.541	18.801
ENSGALG00000001334	156.795	158.247	168.883	160.742	176.55	143.898
ENSGALG00000001335	50.5007	46.1668	47.9727	56.3812	52.612	65.1848
ENSGALG00000001341	5.65302	7.06366	6.24843	5.59396	5.71956	4.16787
ENSGALG00000001342	0.788959	0.989345	0.908114	1.01651	0.927543	2.6595
ENSGALG00000001343	0.444989	0.253656	0.2189	0.281948	0.333701	1.00934
ENSGALG00000001347	0.724763	0.580987	1.10933	0.407084	1.15695	1.03107
ENSGALG00000001350	7.95698	7.92151	8.23879	6.59478	7.3524	13.6296
ENSGALG00000001362	23.2232	19.255	25.7378	22.1089	24.3476	16.8194
ENSGALG00000001363	5.56538	5.31579	5.52975	5.99622	6.94326	8.00509
ENSGALG00000001364	65.2403	74.692	70.6486	67.0347	73.2055	79.6469
ENSGALG00000001366	5.06264	4.2364	5.37459	6.32762	4.83803	7.58198
ENSGALG00000001369	0.21879	0.026343	0.0289404	0.214993	0.0565653	0.406579
ENSGALG00000001370	2.50281	4.74749	6.59357	5.35963	4.87523	6.34762
ENSGALG00000001371	33.1735	36.3343	22.0906	4.63292	16.2595	10.3027
ENSGALG00000001373	0.537395	0.471408	0.385446	0.405102	0.215225	0.381164
ENSGALG00000001374	24.4838	20.6675	20.603	19.0101	20.9802	14.3123
ENSGALG00000001375	21.0179	17.6735	21.5964	21.8638	23.254	24.4179
ENSGALG00000001376	9.81573	12.3511	10.1395	10.3241	15.2354	13.4585
ENSGALG00000001377	7.81711	8.28787	6.89972	7.82207	8.40921	12.0021
ENSGALG00000001382	14.1577	13.1424	14.1619	14.3954	13.8148	11.6206
ENSGALG00000001383	0	0.216608	0.102972	0.0781409	0.0501033	0.267413
ENSGALG00000001387	1.96909	2.04798	1.18662	0.448502	1.99463	0.828189
ENSGALG00000001389	2.87751	3.27018	4.09112	3.30076	3.34651	6.72633
ENSGALG00000001391	0.580977	0.160169	0.360818	0.0739278	0.0889567	0.430584
ENSGALG00000001392	12.7689	9.57528	10.7306	9.60315	10.3926	8.51807
ENSGALG00000001394	13.9582	14.8951	15.9005	17.7863	15.7218	19.7418
ENSGALG00000001405	23.7143	41.0788	41.9009	37.2155	48.3143	120.488
ENSGALG00000001407	37.4934	36.5427	19.3602	29.5689	25.8278	14.1806
ENSGALG00000001409	0.117172	0.113521	0.0602308	0.132186	0.163297	0.532798
ENSGALG00000001410	0.240096	0.439317	0.310713	0.229059	0.514062	0.716807
ENSGALG00000001412	31.1539	28.5581	27.8866	24.6537	24.252	42.7209
ENSGALG00000001416	0.526215	0.223501	0.383084	0.129179	0.185421	0.355547
ENSGALG00000001418	0.268631	0.354962	2.80017	0.191309	0.326937	12.6551
ENSGALG00000001419	10.3744	14.4227	13.5076	11.7479	17.1965	26.8836
ENSGALG00000001420	11.6116	13.0711	12.8362	11.4987	13.6186	18.6424
ENSGALG00000001425	4.03861	4.22685	6.44693	5.66657	5.19111	21.5725
ENSGALG00000001428	31.7443	28.0871	33.5145	30.5221	35.3566	58.1912
ENSGALG00000001429	11.9507	13.3677	12.932	13.4188	14.093	18.5798
ENSGALG00000001433	1.58477	3.20814	2.63926	2.51615	3.25637	8.22127
ENSGALG00000001434	7.38828	5.50847	11.5436	6.34435	7.23245	21.6855
ENSGALG00000001437	2.39254	1.84502	2.55874	2.98139	2.86297	2.58014
ENSGALG00000001439	9.53591	10.2394	9.82383	10.8359	11.4345	17.8276
ENSGALG00000001441	38.4123	39.6609	37.0607	36.4346	46.0007	61.4809
ENSGALG00000001442	0.0333056	0.546898	0.786563	0.608215	0.343361	0.0989045
ENSGALG00000001445	1.8397	1.68538	2.40876	1.93462	3.8059	3.93061
ENSGALG00000001446	28.5368	28.0425	33.079	27.6874	29.0266	28.889
ENSGALG00000001449	1.57716	0.268007	0.0991782	1.35816	0.620174	0.36978
ENSGALG00000001450	0.16471	0.212964	0.290003	0.275962	0.218475	1.76289
ENSGALG00000001452	94.941	91.7146	92.8263	97.4717	100.612	100.962
ENSGALG00000001459	1.48395	1.08848	2.00503	0.937677	1.35216	0.846606
ENSGALG00000001462	0.153409	0.0884821	0	0.234306	0.218899	0.116112
ENSGALG00000001463	5.87121	5.57493	5.08287	5.24277	5.43707	3.41278
ENSGALG00000001465	790.398	673.554	527.572	784.629	727.245	555.048
ENSGALG00000001467	24.3888	22.1249	21.7015	17.506	28.0134	23.6012
ENSGALG00000001470	13.8562	13.3243	11.2999	11.244	13.0597	10.3859
ENSGALG00000001472	57.22	51.2458	53.9659	51.55	41.296	32.8641
ENSGALG00000001473	11.258	9.52978	8.89914	8.43654	8.30412	6.07241
ENSGALG00000001474	75.6232	80.3774	86.2323	72.2425	91.3756	123.702
ENSGALG00000001475	236.375	271.872	282.321	272.284	342.678	312.009
ENSGALG00000001476	47.7468	46.1656	47.7771	43.6221	45.0922	41.7777
ENSGALG00000001479	7.67218	8.22516	10.0273	9.0151	9.44431	22.0916
ENSGALG00000001480	1.34149	2.90183	2.74781	2.59175	3.16226	9.07556
ENSGALG00000001483	16.4142	19.0527	19.9981	17.687	21.0546	22.9842
ENSGALG00000001486	0.245961	0.1116	0.136651	0.112419	0.176435	0.098097
ENSGALG00000001489	23.4523	26.0741	23.5069	24.7436	26.7154	20.0487
ENSGALG00000001491	6.37938	7.59031	8.24707	8.93607	9.7141	18.9087
ENSGALG00000001492	64.4758	67.5335	72.3558	68.0005	79.6076	73.0128
ENSGALG00000001501	49.2193	57.8458	49.0402	46.7416	53.4278	53.9003
ENSGALG00000001502	22.1566	20.016	20.5148	21.7301	24.0014	20.6224
ENSGALG00000001503	17.1671	17.9923	19.6912	17.1937	22.9149	34.7778
ENSGALG00000001504	10.6957	9.67091	11.499	8.83715	10.6727	28.4989
ENSGALG00000001506	85.7951	89.5199	82.993	101.486	88.6506	85.4581
ENSGALG00000001512	0.117899	0.5521	0.0620072	0	0	0.0172686
ENSGALG00000001513	2.5428	3.59283	2.79976	2.60215	2.91203	3.0528
ENSGALG00000001521	14.9985	16.2061	22.0146	20.2071	21.7116	20.6323
ENSGALG00000001522	8.60581	8.06844	9.16071	7.39135	8.85165	10.6638
ENSGALG00000001525	17.5248	14.1695	17.4976	14.6406	16.8873	22.0393
ENSGALG00000001527	7.0801	5.79166	10.3128	6.63363	9.5346	6.44788
ENSGALG00000001529	22.2008	21.8118	23.9707	25.8328	28.87	24.716
ENSGALG00000001531	1.80004	2.82813	2.67904	2.26297	2.65388	3.42365
ENSGALG00000001533	0.0413581	0.118918	0.0433473	0.0951509	0.0563511	0.0938169
ENSGALG00000001536	6.27703	6.4429	7.94649	6.07296	5.80355	9.36536
ENSGALG00000001538	23.9964	20.3321	25.0246	24.3776	26.916	43.3855
ENSGALG00000001540	17.2752	19.1016	19.3512	20.7224	22.2768	22.9367
ENSGALG00000001542	39.6811	32.9664	38.9374	44.9588	40.9563	36.6429
ENSGALG00000001545	0.429263	0.712577	0.638454	0.77809	0.691064	0.626963
ENSGALG00000001546	2.28181	2.48219	1.40191	1.64828	2.09566	1.64587
ENSGALG00000001547	52.4316	48.5451	51.4079	50.3653	54.9231	52.4086
ENSGALG00000001550	46.656	48.9299	50.7762	51.1706	44.2838	42.8391
ENSGALG00000001551	41.482	39.944	44.1825	43.6049	39.9417	46.1985
ENSGALG00000001555	18.768	17.5032	17.8939	24.4206	20.261	28.0065
ENSGALG00000001557	9.37745	8.31302	8.31652	9.08862	10.228	12.1094
ENSGALG00000001558	40.9761	38.3137	33.4924	33.3037	33.5957	22.1243
ENSGALG00000001559	1116.47	1081.1	508.092	711.303	721.308	460.423
ENSGALG00000001561	33.8609	21.9187	36.3057	24.518	25.3108	26.1123
ENSGALG00000001563	30.2872	32.6778	31.2944	28.5709	33.5314	50.5782
ENSGALG00000001564	2.71735	3.48966	3.30435	2.78092	2.30338	3.37255
ENSGALG00000001565	0.497362	1.42513	1.71968	0.951072	1.22323	6.15951
ENSGALG00000001568	25.2363	25.1414	25.4705	27.1862	26.8704	39.0589
ENSGALG00000001569	58.2731	57.3855	61.1183	68.7133	58.6326	57.0173
ENSGALG00000001571	1.46069	1.41493	1.80599	1.6299	1.20448	1.95901
ENSGALG00000001572	40.0363	42.7145	43.8641	52.5306	51.1704	40.9197
ENSGALG00000001573	0.247446	0.357545	0.29196	0.0268769	0.379444	0.810885
ENSGALG00000001577	12.3485	12.5389	12.7332	10.9482	14.2341	17.5426
ENSGALG00000001583	1.67938	1.56314	1.57778	1.73784	1.73484	1.54331
ENSGALG00000001586	6.16049	9.12378	8.79606	8.28194	10.5343	9.8604
ENSGALG00000001593	21.531	21.7822	26.8846	24.1187	24.1302	26.1892
ENSGALG00000001595	1.68179	2.12431	1.86857	1.82267	2.53697	2.27428
ENSGALG00000001596	8.80002	11.9509	10.2406	8.13577	9.11522	13.0273
ENSGALG00000001597	42.1933	43.389	35.4453	47.7629	44.6387	49.0463
ENSGALG00000001600	5.7573	6.00775	7.2193	4.94319	5.68452	6.11756
ENSGALG00000001602	85.4247	87.9805	89.5997	95.6093	99.1744	125.593
ENSGALG00000001603	4.30312	5.59294	7.56041	6.36762	4.24889	22.1969
ENSGALG00000001604	31.4159	38.2548	29.3733	20.3473	34.9011	20.0349
ENSGALG00000001605	3.95392	4.49856	5.67975	4.84964	3.65598	11.0695
ENSGALG00000001606	7.7078	10.546	12.1409	9.99569	11.3708	13.6929
ENSGALG00000001607	10.069	10.7066	12.2969	14.0083	10.2972	13.1285
ENSGALG00000001608	0.777158	0.857259	1.53435	0.512161	0.924232	4.70902
ENSGALG00000001610	7.97878	7.79114	8.5256	7.7352	10.1726	9.99902
ENSGALG00000001611	0.313676	0.144632	0.325677	0.0510581	0.302638	0.493288
ENSGALG00000001613	27.1735	23.142	29.4352	26.1725	27.7494	27.168
ENSGALG00000001615	6.43509	6.62309	7.32894	7.65331	7.44937	6.40912
ENSGALG00000001616	17.4614	20.5717	17.9383	22.6639	24.3918	23.4676
ENSGALG00000001617	0.677166	0.88329	1.30613	0.453046	1.30049	2.54235
ENSGALG00000001618	7.69286	8.46574	9.08668	8.82434	10.4006	26.0582
ENSGALG00000001619	6.67468	7.67818	8.15521	7.42311	9.57399	18.9368
ENSGALG00000001620	1.78372	1.80397	1.67278	1.6269	1.78255	4.1485
ENSGALG00000001621	9.03227	6.38903	12.5759	9.78288	8.77327	11.4658
ENSGALG00000001624	5.98784	6.06147	6.69537	6.6488	6.30628	7.97424
ENSGALG00000001626	0.0747774	0.0241159	0.078348	0.0426541	0	0.19027
ENSGALG00000001633	17.0587	16.6126	21.543	18.2299	18.7015	34.0027
ENSGALG00000001634	1246.98	1120.97	1145.5	1206.09	1113.44	923.363
ENSGALG00000001637	5.03874	5.07849	5.09004	4.08479	6.19622	9.97735
ENSGALG00000001639	9.85843	7.94073	9.1154	7.86327	9.33576	15.5104
ENSGALG00000001640	40.4667	42.1792	45.2446	59.2121	43.5518	48.8099
ENSGALG00000001642	29.8638	30.2888	27.6272	41.7238	32.2087	37.5346
ENSGALG00000001644	9.21103	9.07199	9.00727	8.60434	9.18126	11.9163
ENSGALG00000001645	2.0009	2.3167	0.939898	1.46236	1.68858	1.48452
ENSGALG00000001647	6.35837	6.90578	6.67045	7.86413	7.68666	10.433
ENSGALG00000001651	3.6968	4.60029	4.37153	4.59587	4.00077	5.16015
ENSGALG00000001652	113.561	106.674	126.172	120.665	118.319	90.3597
ENSGALG00000001653	0.887897	0.936298	0.913254	0.858269	0.803628	0.898731
ENSGALG00000001654	107.837	112.822	108.961	127.993	163.381	125.618
ENSGALG00000001655	109.695	101.788	95.0798	106.25	101.908	88.2347
ENSGALG00000001658	601.795	570.026	568.295	526.397	515.933	425.772
ENSGALG00000001662	0.163961	0.149187	0.121218	0.196029	0.27685	2.29578
ENSGALG00000001663	16.2885	17.1427	15.9989	19.5778	17.4927	16.9439
ENSGALG00000001664	13.7891	13.6969	10.6272	14.1723	14.3183	11.0517
ENSGALG00000001666	13.8238	17.9487	20.8825	24.1655	20.8936	35.1174
ENSGALG00000001668	14.1415	14.3205	15.6021	15.0039	16.0122	14.8985
ENSGALG00000001678	6.54328	9.01293	10.1173	9.50295	7.87572	21.5052
ENSGALG00000001682	11.8814	13.7894	14.1556	14.4785	15.2743	19.6052
ENSGALG00000001684	31.8356	32.6763	35.3669	32.7279	40.2658	47.9058
ENSGALG00000001688	18.3505	22.5671	21.9961	19.893	23.4667	53.6667
ENSGALG00000001689	50.904	50.3059	54.5546	57.9769	52.9308	65.8056
ENSGALG00000001690	0.992777	0.671615	1.31462	1.35617	0.415216	2.18954
ENSGALG00000001691	15.5604	16.1227	17.0294	15.4331	18.6563	21.4423
ENSGALG00000001692	15.592	16.4115	11.8495	11.2021	13.3062	16.2649
ENSGALG00000001693	0.161496	0.391004	0.0857799	0.387759	0.293471	0.357998
ENSGALG00000001696	0.899426	1.03338	0.627829	0.575403	0.865359	2.93
ENSGALG00000001698	1.39972	0.905363	2.56155	2.39012	0.722373	1.72081
ENSGALG00000001701	8.37175	6.67905	8.00907	7.86239	6.76759	5.42969
ENSGALG00000001702	4.20565	1.61312	3.05999	2.23022	2.26516	2.06564
ENSGALG00000001708	10.7605	10.316	10.9406	10.562	11.7106	9.77616
ENSGALG00000001709	2.3816	0.976393	1.22789	0.741626	0.559348	1.39264
ENSGALG00000001711	3.78881	3.79731	4.4169	5.55033	4.89143	4.93471
ENSGALG00000001714	8.06421	9.03886	7.77036	6.40294	8.31148	6.32443
ENSGALG00000001716	0.361617	0.319735	0.717884	0.785825	0.416831	0.28101
ENSGALG00000001717	41.3819	55.9923	39.1347	52.8638	50.0571	82.2088
ENSGALG00000001718	39.8031	40.3746	43.7365	46.1689	33.3862	66.1997
ENSGALG00000001720	8.3117	6.84367	8.18535	6.20723	8.29035	4.48551
ENSGALG00000001721	6.90009	7.60943	19.8726	7.85295	9.61561	93.5598
ENSGALG00000001722	8.58761	9.32838	9.85608	9.68686	9.05662	17.1656
ENSGALG00000001725	7.13674	8.47831	8.22519	6.5344	7.05851	6.89842
ENSGALG00000001726	20.7566	19.7857	18.9259	21.3394	21.8081	13.2301
ENSGALG00000001727	7.44751	7.69698	10.8494	8.31398	9.94978	16.8902
ENSGALG00000001728	6.01483	7.95816	7.94976	6.36068	7.30308	9.14587
ENSGALG00000001729	14.6194	16.8847	15.0566	17.9424	13.8667	12.0377
ENSGALG00000001730	9.32826	9.98037	7.42438	8.47148	9.16571	12.6361
ENSGALG00000001731	8.07306	8.32303	8.381	8.05214	8.39466	12.2849
ENSGALG00000001733	12.8892	13.6295	13.5636	11.1847	14.6298	24.5046
ENSGALG00000001737	12.1278	11.9212	11.0684	11.5822	13.0616	13.0726
ENSGALG00000001740	1.56914	3.17586	4.89328	2.74404	2.36514	3.86557
ENSGALG00000001741	72.6474	71.8019	66.7056	79.7132	80.8302	63.7928
ENSGALG00000001749	8.22396	7.71424	13.3398	10.5497	11.3197	30.2898
ENSGALG00000001750	37.6722	42.5261	34.8101	38.5633	36.74	33.4766
ENSGALG00000001753	1.52237	1.67315	1.22831	0.998429	1.42785	0.599753
ENSGALG00000001758	8.31974	9.06846	9.13419	8.85389	11.3756	20.9711
ENSGALG00000001764	1.35286	1.30392	0.796307	1.03775	1.55467	1.2376
ENSGALG00000001765	5.05495	5.05341	3.3762	4.46141	4.69382	6.00363
ENSGALG00000001768	1.99732	2.71374	2.68119	2.94405	1.91987	3.22312
ENSGALG00000001773	10.6854	13.0639	10.3019	12.6608	11.2272	13.4313
ENSGALG00000001774	6.71557	7.93607	7.23202	5.36899	8.31247	5.745
ENSGALG00000001777	20.7159	25.1916	27.0219	22.2026	22.593	32.5475
ENSGALG00000001779	1.43545	1.92109	1.90205	2.00724	1.98732	4.02178
ENSGALG00000001780	0.137967	0.269221	0.230206	0.166425	0.0839425	0.0267228
ENSGALG00000001782	13.1454	13.3316	13.4859	11.6848	13.6804	27.671
ENSGALG00000001788	23.6778	23.9054	23.4054	27.2304	28.5168	27.8444
ENSGALG00000001790	4.80004	7.24893	6.5591	6.82406	6.40298	6.55604
ENSGALG00000001791	4.88946	5.21267	4.99823	5.30668	4.05353	4.99153
ENSGALG00000001792	48.7453	57.1065	40.1424	57.1799	54.7088	76.6662
ENSGALG00000001797	7.40073	9.48716	13.1441	13.1225	9.09298	27.2847
ENSGALG00000001798	5.77656	6.15966	6.90015	8.07129	6.9394	13.672
ENSGALG00000001800	4.89641	3.96366	3.80145	4.6845	4.57252	4.83632
ENSGALG00000001801	5.18608	6.26407	5.6449	5.47865	4.39187	7.18532
ENSGALG00000001802	12.6825	16.4067	14.8371	12.5843	17.8265	21.6475
ENSGALG00000001803	16.019	16.8106	17.0129	16.0647	16.4362	17.2728
ENSGALG00000001805	41.1955	51.3934	50.2741	48.835	41.8834	62.1941
ENSGALG00000001806	0.0705764	0.0342209	0.111272	0.0614795	0.0721301	0.102186
ENSGALG00000001812	1.10994	2.09679	2.17239	1.87216	2.37243	2.99136
ENSGALG00000001816	4.0619	4.17319	4.63057	4.10149	4.48486	12.1404
ENSGALG00000001817	16.9974	16.7056	17.4445	18.1312	17.5428	16.7024
ENSGALG00000001823	46.75	51.1508	50.6342	55.9719	49.8404	61.0919
ENSGALG00000001824	1.6199	1.26764	1.17691	1.32899	0.837921	0.817386
ENSGALG00000001826	9.09003	9.199	11.2578	9.71741	9.43878	18.4431
ENSGALG00000001828	0.550905	0.424914	0.681396	0.68613	0.407986	1.07158
ENSGALG00000001833	45.1512	44.7051	39.2447	44.4571	45.6072	72.1023
ENSGALG00000001837	11.9248	13.4534	15.2951	14.306	12.1664	22.8459
ENSGALG00000001838	19.6771	21.1393	22.227	22.1541	23.5869	29.8856
ENSGALG00000001840	3.70337	3.82082	4.90936	3.32495	5.41342	3.59292
ENSGALG00000001841	13.5401	16.3314	15.7321	14.8392	16.9315	25.5026
ENSGALG00000001844	2.48555	2.91362	2.14284	3.58831	1.40252	3.76704
ENSGALG00000001845	8.41961	7.51375	8.52515	9.39945	9.16149	5.32176
ENSGALG00000001848	34.2645	33.3963	38.3349	38.0713	39.7698	68.9298
ENSGALG00000001849	0.277284	0.461121	0.388347	0.261335	0.273759	0.378625
ENSGALG00000001850	21.4652	23.774	22.7092	26.3738	25.1879	32.2771
ENSGALG00000001852	16.0209	17.5076	18.9215	16.5067	18.2124	17.0868
ENSGALG00000001856	11.2191	10.3897	5.67756	8.91063	9.436	4.58216
ENSGALG00000001857	3.81624	3.06641	4.06096	3.15866	6.20781	16.8817
ENSGALG00000001859	3.38786	4.53477	4.22118	4.12922	4.22931	5.77149
ENSGALG00000001860	6.15052	5.60272	5.97788	5.8336	5.26914	5.73985
ENSGALG00000001862	2.25154	1.7486	1.58861	2.68782	2.83171	2.50938
ENSGALG00000001863	0.099609	0.275301	0.200533	0.0633497	0.156314	0.0763739
ENSGALG00000001864	1.24394	1.52747	2.06519	1.40299	1.04051	1.13378
ENSGALG00000001869	0.199336	0.235424	0.161527	0.0944195	0.111928	0.145642
ENSGALG00000001872	43.3922	41.4162	38.5264	41.9867	45.5083	31.0503
ENSGALG00000001876	6.83069	7.13953	7.87742	7.26584	4.75426	5.4466
ENSGALG00000001882	0.193223	0.172658	0.536175	0.249157	0.312162	0.426985
ENSGALG00000001883	3.60099	3.24653	5.33453	2.42145	4.07307	18.8134
ENSGALG00000001889	2.29382	2.3248	2.15932	1.71242	1.81607	3.348
ENSGALG00000001892	13.3373	10.9118	17.7152	14.5652	19.4629	21.8452
ENSGALG00000001894	0.170634	0.119572	0.160113	0.0527083	0.123823	0.21726
ENSGALG00000001895	29.8867	32.9699	20.2393	18.9129	28.5347	19.3741
ENSGALG00000001901	19.5019	21.1236	20.3092	18.7111	23.2676	36.0386
ENSGALG00000001905	9.04008	10.9134	17.5424	9.54337	12.58	57.3046
ENSGALG00000001907	16.7946	16.3355	14.1747	14.8421	15.3004	13.853
ENSGALG00000001912	0.0509341	0.0288311	0.271671	0.164266	0.0466296	2.9074
ENSGALG00000001916	11.9222	17.1998	15.1114	8.97309	14.0671	10.3501
ENSGALG00000001918	3.15558	3.86571	3.71679	3.76477	4.28867	3.84675
ENSGALG00000001921	1.82702	1.48557	1.07555	1.77739	1.14758	1.50644
ENSGALG00000001925	5.46402	6.46847	5.47814	6.52227	6.48596	8.32497
ENSGALG00000001926	99.6713	124.758	149.961	135.602	103.752	115.31
ENSGALG00000001933	11.3874	11.9906	5.35063	5.39002	11.2258	12.2137
ENSGALG00000001938	18.4208	21.1788	21.4376	18.041	21.4403	40.8884
ENSGALG00000001939	10.0721	10.7904	10.1918	8.64688	10.4567	6.42855
ENSGALG00000001942	11.453	15.672	13.9763	17.4063	15.3686	23.2915
ENSGALG00000001943	3.56035	4.45174	5.45684	4.52128	3.45806	8.8096
ENSGALG00000001944	4.46273	4.81873	3.93878	4.18137	4.32607	5.5803
ENSGALG00000001945	9.01607	10.4805	7.30721	10.4526	10.4582	15.4387
ENSGALG00000001946	5.15389	3.88893	3.38153	3.84726	3.25748	4.38757
ENSGALG00000001947	13.4939	12.591	12.3348	12.1992	13.7233	12.632
ENSGALG00000001948	16.2634	17.4486	18.9361	16.9662	16.2755	14.2076
ENSGALG00000001949	52.257	57.4103	55.5234	64.9549	63.4409	67.8973
ENSGALG00000001950	21.172	19.4626	20.5855	21.3634	23.3516	27.3366
ENSGALG00000001951	3.268	4.04191	5.04577	3.77067	3.97654	14.0144
ENSGALG00000001954	5.6421	7.49065	6.62042	6.32776	7.82733	9.96256
ENSGALG00000001956	8.95318	9.10769	11.6021	8.89236	9.87327	7.51455
ENSGALG00000001959	1.11469	1.41297	2.99735	1.29214	2.09196	8.27359
ENSGALG00000001962	62.5413	66.8816	62.943	63.0817	72.3648	83.8092
ENSGALG00000001963	1.29772	1.87993	2.22348	2.14121	1.81473	3.99708
ENSGALG00000001964	5.88263	7.65913	7.08452	7.14375	8.2013	10.5714
ENSGALG00000001965	22.0197	23.8473	21.4288	25.6815	24.6885	28.555
ENSGALG00000001968	0.430195	0.828803	0.544219	0.599386	0.697344	0.790733
ENSGALG00000001971	12.5015	14.423	18.19	13.3869	18.6674	49.4388
ENSGALG00000001972	18.1907	18.0322	18.0115	18.9309	18.7356	16.3824
ENSGALG00000001973	10.7075	12.3792	13.0871	12.8188	13.3184	24.3757
ENSGALG00000001975	14.1237	13.5057	13.6009	14.6557	13.7266	19.4244
ENSGALG00000001976	7.21826	8.84473	7.93524	7.36753	8.90248	17.6784
ENSGALG00000001977	0.0239204	0.138846	0.098665	0.0801555	0.286025	0.483874
ENSGALG00000001978	15.0731	14.9413	15.7611	16.6888	17.3309	24.1419
ENSGALG00000001981	6.27577	6.2113	7.33016	6.15319	6.15868	8.58114
ENSGALG00000001983	0.977398	0.716105	0.760507	0.499501	0.780094	3.02721
ENSGALG00000001985	4.90961	3.92277	5.33762	6.04315	4.55823	6.03897
ENSGALG00000001986	77.887	80.348	86.6855	82.7162	89.6048	103.221
ENSGALG00000001988	7.94543	7.53716	6.64042	7.57736	7.84645	8.80577
ENSGALG00000001992	432.798	471.449	570.734	412.98	585.025	961.686
ENSGALG00000001995	24.378	22.6194	28.6558	20.0653	27.7844	25.114
ENSGALG00000001996	1.41392	1.94941	1.66142	1.59549	1.2021	3.13617
ENSGALG00000001998	11.2893	16.4376	13.9675	13.2987	12.891	22.2649
ENSGALG00000002000	21.6686	29.803	28.1602	31.7986	34.3666	78.754
ENSGALG00000002001	17.9681	18.2776	22.0405	15.758	22.2221	48.3727
ENSGALG00000002002	43.5719	39.3457	38.5599	48.0253	41.4285	51.0771
ENSGALG00000002003	11.331	11.082	9.31627	8.69749	9.57997	9.33914
ENSGALG00000002008	3.81061	6.08051	4.35345	6.30414	6.90702	6.01827
ENSGALG00000002009	2.7482	3.14387	2.67759	4.05813	3.97717	7.88671
ENSGALG00000002010	11.6036	13.7047	12.2959	14.6426	15.9282	19.0827
ENSGALG00000002012	11.0894	11.7691	9.3171	10.1752	10.2849	7.51503
ENSGALG00000002013	63.2257	64.3414	64.9037	78.2013	69.0364	74.5451
ENSGALG00000002014	25.8478	23.6667	24.9971	26.2593	26.9191	21.2157
ENSGALG00000002015	0.737316	0.679704	0.52531	0.841958	0.885356	0.558793
ENSGALG00000002016	7.85061	7.8974	6.88475	6.84669	9.0632	9.83277
ENSGALG00000002018	8.54492	9.41525	9.43173	9.33797	9.07265	9.35261
ENSGALG00000002021	4.80937	5.1185	6.20194	4.95042	5.3751	12.3181
ENSGALG00000002022	21.9719	22.7683	22.6451	20.512	23.3016	21.1061
ENSGALG00000002023	4.61844	4.31102	4.92735	4.52422	6.45769	8.16211
ENSGALG00000002024	9.66141	9.41745	10.097	12.4777	9.9433	12.3219
ENSGALG00000002028	2.22218	3.1366	3.65606	2.03512	2.58162	2.19036
ENSGALG00000002029	17.5091	16.9859	18.3468	17.7981	18.7868	43.6329
ENSGALG00000002033	135.418	161.045	136.953	171.942	160.024	181.559
ENSGALG00000002038	3.05875	3.4493	2.2577	3.55095	2.57094	3.24478
ENSGALG00000002042	10.6182	11.5068	10.4592	11.4	11.3884	10.1225
ENSGALG00000002043	5.63798	5.70186	5.64619	5.59386	5.88678	5.47872
ENSGALG00000002044	5.57285	5.08803	5.72442	4.73267	5.87281	7.05309
ENSGALG00000002046	7.22059	8.58901	7.01981	9.04872	8.30534	8.3548
ENSGALG00000002048	1.6459	1.7641	1.49086	1.69151	1.56317	1.88403
ENSGALG00000002050	20.9754	19.7115	23.8874	19.23	22.3168	33.4304
ENSGALG00000002053	102.209	111.639	99.3125	123.819	104.3	97.2705
ENSGALG00000002055	5.71123	7.10963	14.7264	6.70574	7.15122	26.417
ENSGALG00000002056	13.9443	12.6717	19.6755	16.6608	13.3303	23.5287
ENSGALG00000002057	36.6842	35.2615	32.4704	41.5243	38.5516	42.7966
ENSGALG00000002060	46.3935	43.922	46.095	51.378	55.3845	38.5015
ENSGALG00000002062	23.3046	24.7491	27.1128	27.6118	27.2282	30.7399
ENSGALG00000002064	27.0076	31.4186	35.8618	36.4874	36.028	47.5688
ENSGALG00000002066	87.2995	75.4394	96.5134	91.6735	97.5546	94.9705
ENSGALG00000002067	7.77941	6.28671	6.10419	6.64675	7.94016	9.7106
ENSGALG00000002069	4.99881	4.78866	6.79079	8.72292	5.48975	5.9911
ENSGALG00000002070	10.1378	11.4066	10.4335	11.9575	13.0257	14.7298
ENSGALG00000002080	1.10402	0.8443	1.34359	0.809087	0.691731	1.84752
ENSGALG00000002081	3.37855	2.77701	3.93998	2.58181	3.23827	2.8717
ENSGALG00000002082	0.135212	0.0931368	0.100651	0.049622	0.0585005	0.458436
ENSGALG00000002083	2.6173	3.45821	14.8101	3.11147	5.84668	68.5205
ENSGALG00000002085	19.8444	19.6264	20.5146	18.9621	22.1169	42.9512
ENSGALG00000002086	0.274616	0.269984	0.79173	1.15112	1.27161	0.772353
ENSGALG00000002087	6.63361	6.27963	6.26255	6.04717	6.94202	8.49994
ENSGALG00000002088	1.4355	1.63773	4.04804	2.2451	1.97947	1.47098
ENSGALG00000002089	39.1308	47.3485	40.5661	45.0609	47.7216	60.079
ENSGALG00000002090	7.65706	8.05985	8.29638	11.176	11.7117	6.71408
ENSGALG00000002091	0.3832	1.99706	3.65549	1.74024	0.79357	3.92014
ENSGALG00000002094	10.1062	11.9386	13.3478	13.0477	13.7035	11.8789
ENSGALG00000002095	61.6621	59.7905	61.5384	62.1342	61.8728	61.4781
ENSGALG00000002099	11.4514	15.4372	16.0643	12.7007	15.4012	18.8889
ENSGALG00000002102	0.984283	2.8025	2.42449	2.94082	5.05858	0.853616
ENSGALG00000002103	11.3136	16.6249	6.47373	2.47919	6.08852	7.65758
ENSGALG00000002105	0.419745	0.256792	0.394519	0.063195	0.152209	1.48336
ENSGALG00000002106	15.7552	15.0169	13.1739	12.4116	15.5113	14.5475
ENSGALG00000002107	55.2254	53.5782	50.9301	58.04	68.3753	59.4291
ENSGALG00000002108	0.11655	0.0821601	0.0233759	0.0117909	0.104087	0.0699978
ENSGALG00000002110	2.49661	3.01979	2.72598	2.40481	3.06448	3.03671
ENSGALG00000002111	0.147484	0.426444	0.359809	0.425891	0.523146	4.45559
ENSGALG00000002112	1.71645	2.3693	3.70368	3.30585	1.25482	3.50821
ENSGALG00000002113	1.11124	1.22002	1.57031	0.937206	0.83931	0.704798
ENSGALG00000002116	1.0665	1.03964	1.49399	1.69194	1.45259	2.54557
ENSGALG00000002117	18.3867	18.5865	15.936	17.1467	19.5993	20.5466
ENSGALG00000002118	17.604	12.6079	16.9788	11.5724	11.5637	12.7079
ENSGALG00000002119	24.0647	27.3242	28.8144	26.7679	31.0095	35.8892
ENSGALG00000002123	1.55835	1.77517	1.909	1.68755	1.67102	2.07719
ENSGALG00000002124	4.66535	4.92145	3.28558	4.25574	3.93693	2.85245
ENSGALG00000002125	0.84548	0.925468	0.674796	1.09157	0.917417	0.432984
ENSGALG00000002127	8.72454	8.74785	7.56812	11.3779	8.90345	9.94565
ENSGALG00000002129	9.94627	11.2409	13.6059	10.6789	13.8267	31.9715
ENSGALG00000002131	12.1582	13.0515	12.8506	16.418	11.7301	14.382
ENSGALG00000002132	7.73167	5.16458	7.21643	9.90823	5.79131	5.71227
ENSGALG00000002137	33.1605	32.7593	29.7944	31.8467	37.0097	38.9226
ENSGALG00000002138	9.89241	11.3163	9.99102	10.9088	10.2778	15.3664
ENSGALG00000002139	138.564	149.381	145.133	145.199	156.221	131.542
ENSGALG00000002141	16.6708	17.0759	15.1357	14.541	16.1156	12.3775
ENSGALG00000002142	12.4019	14.3115	5.31284	9.51405	14.3169	11.8863
ENSGALG00000002143	7.07681	7.33607	9.01816	6.88661	8.20723	11.9462
ENSGALG00000002144	48.6813	48.6064	45.0078	45.2884	48.1391	35.0382
ENSGALG00000002145	11.4287	11.2433	8.43564	8.56769	8.44188	7.0857
ENSGALG00000002147	39.9682	46.3856	47.2117	42.7471	55.5208	85.3764
ENSGALG00000002150	5.79652	7.29311	14.1703	7.65097	10.5649	59.2018
ENSGALG00000002151	7.8479	8.73396	9.78729	9.85776	12.296	17.3876
ENSGALG00000002152	0.826022	0.571407	0.719933	1.35934	0.612031	0.297057
ENSGALG00000002155	23.5985	23.6677	23.8687	27.859	31.8511	31.8965
ENSGALG00000002157	556.935	520.026	560.838	518.659	471.984	374.231
ENSGALG00000002158	10.4847	11.9374	10.9839	11.5845	12.2286	20.6124
ENSGALG00000002159	30.722	31.2894	30.6502	28.6964	34.5085	37.5718
ENSGALG00000002160	380.543	446.894	472.47	334.132	431.79	290.523
ENSGALG00000002162	28.5003	28.6924	25.4435	24.1036	31.1395	28.4842
ENSGALG00000002164	11.4208	14.5151	13.034	13.2928	13.6678	18.4299
ENSGALG00000002165	3.03604	3.85591	2.72621	1.61301	5.24012	4.61588
ENSGALG00000002167	4.65261	4.91884	6.55319	5.49671	8.13832	16.0521
ENSGALG00000002169	48.0831	46.0184	40.5301	49.1389	54.4695	39.7426
ENSGALG00000002170	0.371804	0.358606	0.57251	0.301167	0.178521	0.334159
ENSGALG00000002172	24.521	26.0102	21.5842	22.0078	23.5545	19.296
ENSGALG00000002175	2.85847	3.72658	2.39998	3.31901	4.05188	1.98027
ENSGALG00000002179	5.11086	9.40367	9.89308	7.92105	7.47595	5.65051
ENSGALG00000002180	10.4202	12.2008	10.681	8.7234	10.5037	12.7041
ENSGALG00000002182	3.42645	4.09056	2.84048	2.33411	3.58104	1.40759
ENSGALG00000002183	7.47846	7.17588	9.48049	9.34849	7.16775	3.79039
ENSGALG00000002187	16.2709	18.7993	21.1104	18.2329	18.9465	17.1477
ENSGALG00000002189	141.544	135.287	185.957	140.852	189.019	343.116
ENSGALG00000002191	0	0.0917865	0.215808	0	0	0.106971
ENSGALG00000002192	2.88241	2.61458	2.40548	2.19216	1.7632	1.84214
ENSGALG00000002193	3.55456	2.74627	4.87857	2.39333	3.09186	3.87934
ENSGALG00000002194	16.754	18.4875	16.8003	18.1796	17.2976	26.4536
ENSGALG00000002197	284.027	265.926	280.278	228.121	262.014	223.163
ENSGALG00000002198	3.08485	3.78579	3.59106	3.62135	2.97237	2.54418
ENSGALG00000002199	0.56082	1.00907	0.916895	1.11533	0.674158	0.518544
ENSGALG00000002201	15.1725	23.7284	21.7338	9.53929	12.4439	14.5592
ENSGALG00000002203	0.51357	0.750075	0.579377	0.208446	0.649236	0.504121
ENSGALG00000002204	1.85471	1.76712	4.79534	3.61372	3.7287	13.8868
ENSGALG00000002205	8.16508	9.9153	8.93947	7.60808	8.76739	7.02086
ENSGALG00000002207	0.110371	0.0268828	0.11343	0.298457	0.0273354	0.410098
ENSGALG00000002210	618.731	629.268	606.095	747.027	655.623	483.516
ENSGALG00000002216	12.222	12.5914	14.0888	11.8951	11.9229	23.8456
ENSGALG00000002219	46.8647	55.0846	63.6443	53.0641	61.8041	118.392
ENSGALG00000002222	14.9541	13.9919	14.6924	16.7006	17.6396	22.8553
ENSGALG00000002223	2.8779	3.13337	3.76969	0.778253	2.9005	2.60791
ENSGALG00000002225	7.51845	8.35093	10.7123	6.55784	9.24438	25.2383
ENSGALG00000002227	1.76117	2.24128	0.789592	0.994806	1.11627	0.97557
ENSGALG00000002229	26.9931	28.4123	29.5197	25.9814	29.9486	48.5679
ENSGALG00000002232	11.9257	13.4033	11.6826	9.27169	12.4869	9.94371
ENSGALG00000002234	0.671422	0.52184	0.931519	0.675556	0.484082	0.598302
ENSGALG00000002237	32.022	35.2464	46.4279	30.6918	36.747	55.0478
ENSGALG00000002239	4.67566	5.44524	4.64618	4.95691	5.92279	5.25541
ENSGALG00000002240	3.05798	2.57994	2.14354	2.73506	2.33904	1.91172
ENSGALG00000002242	1.40699	0.971131	0.663311	0.618138	1.3296	0.736626
ENSGALG00000002244	0.120327	0.184016	0.324301	0.0535259	0.191111	0.187088
ENSGALG00000002246	1.58265	2.15087	1.00779	1.56038	1.5415	4.19457
ENSGALG00000002247	7.77774	8.77642	9.86209	8.86084	8.29029	9.7362
ENSGALG00000002249	12.6054	13.9005	13.1533	12.7916	14.7154	8.03584
ENSGALG00000002250	0.885293	0.944726	0.74658	0.925051	1.18401	0.692185
ENSGALG00000002253	3.74504	3.72355	3.78304	4.05393	4.41672	6.72529
ENSGALG00000002260	20.6608	25.1974	24.3251	20.3524	22.2177	40.6626
ENSGALG00000002262	39.0961	37.0405	40.462	39.0485	45.6369	64.4274
ENSGALG00000002263	0.992416	1.15716	1.46302	1.31125	1.16997	0.80579
ENSGALG00000002266	4.9467	5.00428	5.47165	3.30476	5.45187	13.2428
ENSGALG00000002267	6.05171	5.60491	5.5174	5.38071	5.47286	8.04726
ENSGALG00000002272	25.1561	21.8096	22.298	24.2688	22.8701	21.7006
ENSGALG00000002273	9.92487	9.42657	7.81858	10.3334	9.9812	9.37635
ENSGALG00000002276	1.43012	2.8259	2.71597	1.77787	2.20269	4.12745
ENSGALG00000002277	9.30952	11.0614	10.7461	8.31431	10.8323	14.4769
ENSGALG00000002278	3.77612	4.15647	3.34006	3.63632	3.77481	5.08725
ENSGALG00000002282	34.311	28.4761	24.8814	24.3412	32.5529	18.6159
ENSGALG00000002283	8.75842	5.09238	18.8128	14.6272	6.93609	8.84713
ENSGALG00000002284	29.4131	30.1167	31.4106	34.7705	37.878	42.8744
ENSGALG00000002285	23.2984	25.3142	26.2916	25.0478	27.0874	63.474
ENSGALG00000002286	290.203	291.963	283.783	275.944	303.138	299.444
ENSGALG00000002288	10.1822	9.78924	9.26281	10.8689	11.1787	8.14798
ENSGALG00000002289	0.299851	0.0683388	0.218645	0.0149229	0.0176421	0.049533
ENSGALG00000002294	8.03742	5.69528	3.75424	8.61396	5.51294	2.26231
ENSGALG00000002298	8.14169	8.53132	5.31935	10.7959	6.0632	3.23888
ENSGALG00000002301	21.9674	26.0933	25.0785	25.1423	28.7	36.0258
ENSGALG00000002304	16.9539	19.8781	19.5039	19.9384	19.8272	25.7582
ENSGALG00000002305	3.681	3.7285	2.93115	2.03657	2.85698	2.72788
ENSGALG00000002307	0.127582	0.215666	0.269433	0.137438	0.361224	2.60024
ENSGALG00000002308	11.7434	13.2488	11.2652	12.8836	23.4693	12.5242
ENSGALG00000002311	5.41192	7.98873	8.75292	6.48337	6.82256	5.63079
ENSGALG00000002312	0.241218	0.191047	0.440664	0.480463	0.163464	0.431128
ENSGALG00000002313	6.45457	8.52418	5.43607	6.71863	7.21934	9.06757
ENSGALG00000002314	0.0592695	0.0799619	0.295244	0.0303685	0.202331	2.19671
ENSGALG00000002315	30.4035	33.1446	35.4203	36.8472	34.0484	44.6152
ENSGALG00000002316	9.43561	10.0371	10.2269	11.0957	11.3789	21.0597
ENSGALG00000002318	0.0798244	0.142827	0.0824055	0.00949928	0.0572744	0.031855
ENSGALG00000002319	3.57435	3.69518	1.96769	4.07943	5.84504	3.21841
ENSGALG00000002321	90.8441	103.568	94.432	102.07	110.528	97.7466
ENSGALG00000002325	0.0287923	0.221667	0.0610816	0	0.0595596	0.111918
ENSGALG00000002326	6.68065	10.333	10.0531	6.87216	9.10163	6.18251
ENSGALG00000002329	0.152055	0	0.31983	0.200169	0.233564	0
ENSGALG00000002335	0.937063	0.334722	0.556927	0.670549	0.385273	0.884674
ENSGALG00000002336	5.1989	5.51985	6.47197	4.80685	5.5118	13.5057
ENSGALG00000002341	22.5902	23.0033	21.8346	26.9473	23.5225	21.773
ENSGALG00000002345	11.2244	11.7041	13.6893	12.9058	11.7726	26.4346
ENSGALG00000002346	2.36181	2.75001	2.05292	2.92922	3.70996	3.99887
ENSGALG00000002347	23.0271	22.3177	19.1476	23.3562	15.021	9.14582
ENSGALG00000002350	0.169386	0.425227	0.0580864	0.165856	0.10721	0.190746
ENSGALG00000002354	11.2488	11.4937	11.5298	13.4504	13.2802	17.9103
ENSGALG00000002356	3.78241	3.99509	4.37632	3.99618	3.41398	6.88941
ENSGALG00000002358	1.60374	1.45818	1.99613	1.52926	2.31922	1.15401
ENSGALG00000002362	96.2636	104.731	100.088	145.439	105.54	94.1877
ENSGALG00000002363	96.9646	107.21	118.487	111.211	126.369	155.381
ENSGALG00000002364	14.2148	15.721	14.58	15.9953	15.979	20.7228
ENSGALG00000002370	0.108586	0.126585	0.831107	0.205296	0.455377	2.7151
ENSGALG00000002371	2.05069	2.56069	2.35513	1.41548	2.01317	3.3014
ENSGALG00000002374	2.68783	2.61597	2.90314	3.64333	1.74784	1.15204
ENSGALG00000002375	5.34722	6.04032	6.76203	5.58836	6.22131	4.46471
ENSGALG00000002377	794.127	850.312	924.375	569.805	927.888	1237.83
ENSGALG00000002379	52.9475	58.1602	43.7947	67.1466	55.7103	52.2133
ENSGALG00000002383	0.217016	0.105004	0.306741	0.063393	0	0.0735105
ENSGALG00000002386	0.935425	0.993378	1.36011	1.08275	0.884779	0.916899
ENSGALG00000002388	25.0418	23.3651	24.3634	23.8039	24.2089	22.1322
ENSGALG00000002389	4.13647	3.31709	3.75403	2.63296	2.36553	3.27408
ENSGALG00000002390	0.178386	0.421427	0.545577	0.266532	0.381098	0.919926
ENSGALG00000002394	6.10192	5.87977	5.35234	6.16671	6.30961	9.74075
ENSGALG00000002397	1.31064	2.04196	2.31932	1.60505	1.91993	3.09628
ENSGALG00000002399	7.19603	6.09319	6.2391	8.47564	7.68599	4.9912
ENSGALG00000002403	6.40613	4.52032	4.74237	3.64706	5.78602	10.3484
ENSGALG00000002408	4.33686	5.01679	4.46014	4.61013	4.99777	8.53683
ENSGALG00000002412	8.40303	8.79259	9.45471	7.94415	10.2531	21.5537
ENSGALG00000002414	17.4158	14.2003	14.6033	12.5729	13.0345	10.103
ENSGALG00000002415	18.7499	19.3634	21.207	21.8335	22.6242	36.5122
ENSGALG00000002417	11.304	10.4742	11.9199	12.5874	11.6802	16.6949
ENSGALG00000002419	0.920804	1.09236	1.02002	0.972452	1.23933	1.12308
ENSGALG00000002421	166.343	133.923	102.176	129.584	111.948	145.41
ENSGALG00000002424	4.89397	4.81623	5.12468	4.85393	5.14787	7.31272
ENSGALG00000002426	10.3116	12.7701	12.265	12.1265	12.7571	19.2176
ENSGALG00000002427	4.80173	6.21846	7.00207	4.55726	5.38767	14.6429
ENSGALG00000002428	45.0484	45.2394	47.3309	36.0078	69.6734	244.114
ENSGALG00000002430	53.6613	51.4364	45.2664	58.6727	56.1327	42.3389
ENSGALG00000002431	23.7334	19.2644	31.1964	20.6225	19.7703	10.6526
ENSGALG00000002437	2.75067	2.18329	3.38733	3.38135	2.96459	3.17887
ENSGALG00000002439	12.5519	7.23669	3.47818	6.33246	5.69154	2.12115
ENSGALG00000002442	0.0942348	0.274625	0.232041	0.221786	0.128866	0.531471
ENSGALG00000002445	15.2077	14.5226	14.6233	13.869	15.9234	18.4134
ENSGALG00000002447	62.5253	68.6009	75.3538	63.6381	75.3667	91.1575
ENSGALG00000002448	122.941	126.458	133.232	135.676	137.65	161.142
ENSGALG00000002450	12.2371	10.4724	11.7416	9.69218	13.2858	15.5936
ENSGALG00000002452	17.7227	18.2816	15.1539	14.9405	17.0366	33.16
ENSGALG00000002457	14.7754	12.5337	16.3212	13.9446	12.4175	24.6587
ENSGALG00000002458	21.1638	22.1169	22.0195	21.9098	21.0065	22.6584
ENSGALG00000002461	2.66718	3.55738	8.67784	3.67187	7.44254	9.62778
ENSGALG00000002463	9.18512	10.2392	10.6858	11.3264	9.23059	11.0438
ENSGALG00000002466	0.920595	1.06139	1.41153	0.949601	0.969503	2.45108
ENSGALG00000002467	16.8157	14.6094	16.1478	15.7506	16.0215	12.4609
ENSGALG00000002469	16.15	17.2389	15.49	15.1923	14.3895	15.858
ENSGALG00000002470	17.5709	19.8488	18.472	20.8053	23.2087	31.9479
ENSGALG00000002473	2.40893	1.89065	3.05307	2.53246	3.39139	2.02516
ENSGALG00000002478	60.3761	56.3088	54.4242	52.8447	55.324	43.247
ENSGALG00000002479	2.87431	3.49564	2.43234	3.97736	2.88378	2.42929
ENSGALG00000002484	13.5325	16.8923	17.4681	15.28	18.995	38.1172
ENSGALG00000002485	13.0866	15.634	15.0712	17.5919	15.6217	18.4031
ENSGALG00000002486	5.36989	5.52733	6.12058	5.85095	6.84991	7.13575
ENSGALG00000002487	13.4289	13.682	13.9438	13.168	11.1871	9.06633
ENSGALG00000002488	125.045	123.318	120.085	125.627	123.336	161.787
ENSGALG00000002489	4.09559	4.58982	3.84604	3.29772	4.44079	4.17056
ENSGALG00000002490	69.3902	73.5617	71.1652	73.8874	79.0684	80.7182
ENSGALG00000002492	5.14421	5.4763	4.96621	4.93019	5.02962	18.488
ENSGALG00000002495	104.755	118.314	96.5336	136.565	119.089	101.035
ENSGALG00000002496	0.454385	0	0.469377	0.464654	1.11115	1.65497
ENSGALG00000002497	7.90743	10.2204	9.33542	8.98184	10.1422	13.6645
ENSGALG00000002499	8.16548	7.73223	7.43704	7.62857	7.98193	7.31399
ENSGALG00000002500	17.2957	16.5316	15.5756	24.1567	17.4221	13.1106
ENSGALG00000002501	11.6467	13.1178	10.5583	13.0646	13.0244	16.1473
ENSGALG00000002504	6.60983	7.26084	4.67047	4.70817	5.22756	20.4108
ENSGALG00000002506	21.986	24.1064	22.12	18.6354	18.4609	34.2455
ENSGALG00000002507	0	0.211049	0.110874	0.0452472	0.160701	0.199469
ENSGALG00000002510	16.6373	17.7242	17.8399	15.8338	17.2999	31.0497
ENSGALG00000002511	0.317035	0.346495	0.432614	0.245784	0.617447	1.44565
ENSGALG00000002514	48.5935	49.9345	37.9148	47.983	52.5572	40.4809
ENSGALG00000002515	5.56602	5.44617	5.56023	5.20839	8.31675	6.3357
ENSGALG00000002517	16.1576	21.9717	23.7271	24.3001	11.9838	13.3213
ENSGALG00000002519	6.86886	4.98269	5.52961	5.22443	5.38738	6.15719
ENSGALG00000002523	26.5455	27.0536	25.0328	28.0356	30.3479	40.2339
ENSGALG00000002524	26.6566	26.3044	28.6261	26.9587	32.7045	37.7442
ENSGALG00000002525	13.287	17.3495	16.914	9.82143	15.7855	7.51402
ENSGALG00000002527	11.1366	11.143	11.1818	8.37444	11.7391	24.4984
ENSGALG00000002528	81.1003	100.852	92.357	91.8065	94.0272	154.35
ENSGALG00000002529	8.32747	8.42275	10.8821	8.15593	9.93957	12.5883
ENSGALG00000002531	39.8203	42.8737	40.1242	45.0586	48.0676	46.8643
ENSGALG00000002532	4.79128	5.85796	9.99538	7.48522	6.59422	29.6126
ENSGALG00000002536	27.4067	25.272	24.2289	24.1	28.5147	27.7773
ENSGALG00000002539	2.15821	1.58961	1.12637	1.56324	2.58138	1.51771
ENSGALG00000002542	9.01758	8.37207	11.5015	7.51303	6.49863	6.17881
ENSGALG00000002543	12.9384	13.1079	11.8756	12.2251	12.9687	14.6633
ENSGALG00000002544	1.94169	2.25443	2.85067	2.55254	2.10513	2.16485
ENSGALG00000002546	54.9076	72.0882	84.0772	62.6388	77.9646	47.7795
ENSGALG00000002548	31.556	36.1176	35.4128	31.4274	33.0651	32.6014
ENSGALG00000002549	0.502102	0.445352	1.41102	0.163697	0.693306	0.399648
ENSGALG00000002551	1.35203	1.44223	1.28824	1.67607	1.57411	2.38614
ENSGALG00000002553	1.92793	1.83767	1.7964	2.39522	2.89213	1.61389
ENSGALG00000002554	5.87196	6.18871	6.33316	6.76141	7.43026	10.999
ENSGALG00000002555	0.869373	0.0529361	1.89009	0.749952	4.89934	3.64203
ENSGALG00000002556	1.10345	1.22109	1.32096	0.894105	0.666227	2.68044
ENSGALG00000002557	3.90977	6.08221	4.42778	0.682358	1.52125	1.85745
ENSGALG00000002558	0.135335	0.0589507	0.0701568	0.0144504	0.0847382	0.0524148
ENSGALG00000002561	12.0935	19.3982	13.5396	16.6115	18.6821	23.2334
ENSGALG00000002562	4.49814	4.88888	6.00925	4.74154	5.05648	3.62194
ENSGALG00000002563	65.8047	57.1107	50.889	68.9379	63.1141	62.6294
ENSGALG00000002564	2.84024	4.12159	4.63692	2.88846	3.7918	2.69039
ENSGALG00000002569	223.782	214.022	209.684	236.462	273.68	249.647
ENSGALG00000002570	0.18108	0.116555	0.54633	0.264127	0.596257	0.506854
ENSGALG00000002576	1.84204	2.75266	2.30906	1.02528	0.947467	2.56587
ENSGALG00000002577	0.21545	0.206261	0.201353	0.308531	0.394093	1.00041
ENSGALG00000002578	12.0191	10.238	11.778	14.3674	15.1388	15.1917
ENSGALG00000002579	0.0911287	0.165531	0.391508	0.687538	0.33079	0.803601
ENSGALG00000002581	5.96054	5.34686	11.4718	7.7927	7.95568	7.29017
ENSGALG00000002583	2.23439	2.04523	2.22101	1.8935	1.92443	3.81243
ENSGALG00000002587	18.4509	20.8387	22.4011	25.1157	17.6775	36.6842
ENSGALG00000002588	15.3717	19.5366	18.8079	16.5249	18.1287	31.3717
ENSGALG00000002591	82.548	92.01	86.3595	102.563	90.5656	90.2321
ENSGALG00000002594	5.8811	9.382	6.77276	5.51266	8.44511	5.95054
ENSGALG00000002595	275.313	266.254	262.569	266.947	318.434	335.373
ENSGALG00000002597	0.109379	0.141592	0.0389017	0.0326013	0.265863	0.220381
ENSGALG00000002598	18.6772	19.2019	26.572	26.7254	25.0686	28.1211
ENSGALG00000002599	8.70125	7.85442	12.0941	12.431	12.8382	12.3134
ENSGALG00000002603	15.7554	15.0021	14.8848	15.4925	18.2334	18.1959
ENSGALG00000002605	51.9621	63.7302	54.3328	68.0282	70.4069	68.7193
ENSGALG00000002606	84.1354	78.5237	54.6229	66.5268	81.551	41.5276
ENSGALG00000002610	2.08056	2.34502	1.36684	2.86768	1.24498	1.38221
ENSGALG00000002612	17.6872	17.3307	15.6928	16.4523	16.1353	12.2648
ENSGALG00000002615	2.23942	1.86566	3.12047	3.08849	2.86577	6.52362
ENSGALG00000002616	19.1536	22.6686	21.1163	23.5491	23.8998	30.4974
ENSGALG00000002618	2.1946	2.60884	3.09462	3.55475	3.58332	10.8735
ENSGALG00000002621	18.6664	15.8961	27.039	18.2005	19.0521	70.5622
ENSGALG00000002622	1.58009	2.03341	2.66655	2.90297	2.35858	2.86682
ENSGALG00000002623	0.91084	2.18206	1.12	0.371353	1.0516	0.834916
ENSGALG00000002624	9.95723	9.98328	9.70469	9.65934	9.53521	12.414
ENSGALG00000002630	2.70676	2.34856	3.21895	3.06727	2.39882	2.08913
ENSGALG00000002631	3.00283	3.19269	2.87608	2.34336	2.45147	1.4908
ENSGALG00000002632	6.29057	7.45651	6.59421	4.5682	5.16484	4.83701
ENSGALG00000002634	14.153	18.1642	17.0497	18.3766	21.5046	31.6649
ENSGALG00000002637	97.3547	108.764	37.3592	28.6124	66.7022	57.7425
ENSGALG00000002638	1.25535	1.18365	1.76983	0.937748	1.01137	1.40494
ENSGALG00000002639	9.29861	8.89862	9.01234	7.2715	9.27334	6.95529
ENSGALG00000002643	0.775655	1.52176	1.29402	0.748918	1.30615	5.84823
ENSGALG00000002644	299.225	276.142	263.938	249.387	249.649	205.63
ENSGALG00000002645	2.55012	2.0885	4.8341	2.13433	3.87437	16.8958
ENSGALG00000002646	3.77937	3.48168	5.02512	2.81515	2.65671	6.27907
ENSGALG00000002647	1.93947	2.69396	5.09851	1.61867	3.24389	22.1823
ENSGALG00000002648	7.26085	7.54625	5.91321	6.88915	7.14711	6.68073
ENSGALG00000002649	12.6882	14.507	15.0165	13.7236	15.9025	15.796
ENSGALG00000002651	23.2632	22.9782	22.2301	22.0058	25.1451	22.5282
ENSGALG00000002653	5.61008	5.23844	4.63225	5.01303	5.55869	4.17709
ENSGALG00000002655	18.8839	19.3327	15.9385	12.0645	14.7211	11.0017
ENSGALG00000002656	18.4366	19.3287	19.8521	17.5523	18.9468	17.7106
ENSGALG00000002659	30.7663	35.8312	34.2563	35.0807	42.1774	49.9346
ENSGALG00000002661	201.286	211.961	219.18	211.845	241.281	221.125
ENSGALG00000002663	4.03124	4.72235	2.55187	3.36159	4.37792	3.81042
ENSGALG00000002666	18.205	15.7375	15.8545	17.1505	19.1948	20.4656
ENSGALG00000002667	13.941	17.3239	16.1889	16.6895	24.0048	23.456
ENSGALG00000002671	3.06664	4.47207	3.69868	2.10253	2.61668	4.88187
ENSGALG00000002675	3.12415	2.4184	2.65005	5.51966	4.15071	4.41068
ENSGALG00000002678	3.61779	3.22812	2.90066	1.908	5.03971	2.35565
ENSGALG00000002679	2.13939	1.33593	2.02876	2.62222	1.81845	2.53387
ENSGALG00000002682	7.2815	8.35605	6.83351	7.43777	7.15863	9.70985
ENSGALG00000002683	40.51	49.5034	51.3372	53.1817	63.123	53.8363
ENSGALG00000002686	10.3073	10.1395	9.46285	10.9802	11.9677	17.8013
ENSGALG00000002688	0.744981	0.721022	0.408916	0.899768	0.271614	0.686206
ENSGALG00000002689	15.582	19.4719	22.2963	19.9184	21.1964	57.6886
ENSGALG00000002690	6.31698	6.81429	6.35494	6.99355	7.33312	13.8705
ENSGALG00000002693	10.7898	13.0357	13.317	12.6723	14.0602	14.1709
ENSGALG00000002695	11.6665	12.4702	12.6833	12.1515	10.1353	12.786
ENSGALG00000002699	11.8243	13.3297	14.2546	10.9491	13.8785	14.3285
ENSGALG00000002701	49.2944	65.4607	50.463	56.7283	64.6389	86.3723
ENSGALG00000002703	40.9562	46.5298	48.0127	59.3591	55.263	53.2806
ENSGALG00000002705	35.2812	45.8717	45.848	50.1563	48.6677	56.793
ENSGALG00000002706	4.30042	4.13639	2.57886	3.04256	2.83026	1.778
ENSGALG00000002707	2.703	3.22583	2.08643	2.00558	1.86775	1.91086
ENSGALG00000002708	12.3003	9.71241	10.4238	7.65387	14.4378	6.73497
ENSGALG00000002709	35.7065	32.1485	32.499	30.421	30.0629	29.3881
ENSGALG00000002710	8.71374	7.29225	10.904	7.63564	8.87541	29.4121
ENSGALG00000002714	0.626745	0.712389	0.524129	0.813588	0.817922	1.45887
ENSGALG00000002719	23.1642	24.439	23.9667	21.7394	22.4207	21.5358
ENSGALG00000002722	8.32027	11.7458	5.01755	4.4444	5.52994	7.41449
ENSGALG00000002723	2.89967	3.95803	3.96129	3.14651	4.08551	3.48489
ENSGALG00000002725	6.80135	6.85644	6.36109	8.19644	7.66247	8.19786
ENSGALG00000002726	28.5934	27.3103	23.295	22.3691	24.9917	20.3153
ENSGALG00000002728	0.229293	0.377309	0.817712	0.211832	0.229014	0.124343
ENSGALG00000002729	2.31666	3.07048	2.31185	1.7341	2.72595	3.82486
ENSGALG00000002734	48.1469	45.6064	66.0804	63.2945	66.3138	109.762
ENSGALG00000002735	17.7819	18.1858	19.9496	22.145	22.0408	30.6226
ENSGALG00000002739	15.9348	16.3049	15.7058	16.3819	16.3412	13.1125
ENSGALG00000002742	0.41848	0.721668	1.37306	0.497559	1.17954	3.35493
ENSGALG00000002744	0.119574	0.0877432	0.102273	0.119735	0.472243	1.50623
ENSGALG00000002750	33.4646	35.241	31.2991	29.0415	34.4687	31.3108
ENSGALG00000002759	10.7526	12.7318	5.9167	7.17675	9.97387	2.63463
ENSGALG00000002761	9.24416	8.91469	9.38263	6.47615	8.54702	6.10001
ENSGALG00000002762	8.57207	7.26631	7.93317	7.54641	7.93964	9.92653
ENSGALG00000002763	32.0671	43.1233	44.8212	49.7827	47.7956	38.5176
ENSGALG00000002764	75.2885	83.4882	71.665	83.0898	81.6557	48.7956
ENSGALG00000002765	20.3274	19.8065	21.1255	18.1675	18.7279	27.4947
ENSGALG00000002769	10.948	11.0631	13.6791	14.5043	9.53105	10.2401
ENSGALG00000002771	69.7946	67.8984	58.1181	57.9035	60.1371	64.8612
ENSGALG00000002773	38.0637	42.9208	42.7067	45.3052	48.2915	44.4652
ENSGALG00000002774	161.733	155.268	179.74	149.061	170.192	211.031
ENSGALG00000002775	3.06406	2.31021	3.36381	2.36143	3.50778	7.84386
ENSGALG00000002781	6.16988	9.65923	9.85491	9.78512	10.3671	30.4044
ENSGALG00000002783	9.66337	15.9898	17.9825	8.12716	7.28045	25.314
ENSGALG00000002784	12.285	15.1332	16.6817	16.7211	15.8969	19.4484
ENSGALG00000002786	0.694844	0.884052	0.808672	0.764126	0.523876	0.880369
ENSGALG00000002789	0.713475	0.985577	1.21345	0.620663	0.781779	1.8
ENSGALG00000002790	2.94847	3.91186	3.45463	3.33331	4.78487	3.75673
ENSGALG00000002797	42.1728	42.237	41.5932	41.0938	47.2219	38.6998
ENSGALG00000002798	4.94308	5.27553	5.29673	6.76928	5.21728	10.4892
ENSGALG00000002800	0.408868	0.926518	0.395646	0.500434	0.563837	0.190657
ENSGALG00000002802	1.11175	1.69969	1.21097	0.848579	1.13385	1.27389
ENSGALG00000002803	39.9926	45.5642	43.6308	41.064	38.6988	40.4908
ENSGALG00000002804	1.95131	1.70211	2.07979	2.02237	1.98884	8.51694
ENSGALG00000002813	1396.66	1258.49	1361.21	1258.81	1155.19	941.161
ENSGALG00000002816	5.19182	5.86489	7.75582	6.50498	6.66026	14.186
ENSGALG00000002818	51.9355	41.1741	52.0824	41.9743	62.5941	83.8039
ENSGALG00000002820	7.90948	6.51014	6.88492	9.86578	5.4407	12.8963
ENSGALG00000002827	17.667	16.9411	22.3611	17.7857	20.2341	28.2864
ENSGALG00000002830	12.0198	15.7056	14.699	11.4047	12.3268	25.4084
ENSGALG00000002831	8.41271	8.90506	10.3341	9.20582	10.173	16.349
ENSGALG00000002832	17.8527	18.2998	20.1672	19.5618	22.2427	24.4538
ENSGALG00000002836	10.2991	11.1084	10.4831	10.8935	11.4974	13.1097
ENSGALG00000002837	495.85	456.171	487.843	463.745	435.984	334.091
ENSGALG00000002840	0.882472	0.515015	0.868517	0.509661	0.72181	1.49368
ENSGALG00000002841	9.18837	10.0266	12.2594	11.0019	12.2328	34.2688
ENSGALG00000002843	8.62126	9.1986	9.65435	8.53684	6.57638	17.8423
ENSGALG00000002845	0.260008	0.36257	0.6497	0.354897	0.36456	1.1869
ENSGALG00000002846	9.25481	10.2077	14.3006	11.388	13.2046	34.8274
ENSGALG00000002848	0.0640753	0.0205325	0.045211	0.0185877	0.0219802	0.511624
ENSGALG00000002849	10.1225	15.1259	12.1878	19.1847	15.3196	16.7181
ENSGALG00000002850	6.32593	5.90215	5.96049	4.63756	5.13746	4.68801
ENSGALG00000002853	19.6837	20.8204	20.5152	25.7075	26.1392	27.4106
ENSGALG00000002854	5.2841	5.80605	2.58766	4.51822	4.30366	2.34022
ENSGALG00000002855	1.36102	1.58196	1.5367	0.683155	1.14092	0.931665
ENSGALG00000002856	21.4768	20.057	20.2598	24.4386	23.3233	39.454
ENSGALG00000002861	7.47183	8.3622	9.61756	9.38961	9.22577	18.9005
ENSGALG00000002863	67.2799	66.35	66.0218	67.8772	73.9721	62.1243
ENSGALG00000002864	0.158926	0.193883	0.0978761	0.165917	0.0735792	0.0579799
ENSGALG00000002866	8.10476	8.02857	8.95109	6.39566	8.02111	6.09598
ENSGALG00000002868	420.414	401.889	371.568	352.425	358.97	268.775
ENSGALG00000002870	9.21251	10.2235	10.4945	8.92869	10.2624	14.6134
ENSGALG00000002877	3.99747	3.9844	4.78153	4.41384	3.79345	4.5811
ENSGALG00000002878	7.24873	8.11327	6.22531	6.63422	4.41414	4.29753
ENSGALG00000002880	15.1432	12.1824	11.6097	15.9116	13.7522	18.3983
ENSGALG00000002881	16.79	21.5023	16.2049	19.4129	18.2305	17.6212
ENSGALG00000002882	9.59321	9.81568	8.8566	12.9947	9.30193	11.9971
ENSGALG00000002883	2.9967	4.50602	4.48656	4.31963	4.71295	9.18684
ENSGALG00000002886	0.136595	0.0982558	0.25562	0.0602739	0.50171	0.925165
ENSGALG00000002888	3.02046	2.05725	1.74678	3.02833	2.12867	3.16936
ENSGALG00000002891	53.7476	55.102	57.2479	55.7993	58.9003	57.8051
ENSGALG00000002892	1.92923	1.55282	2.41129	2.79108	2.51481	3.63336
ENSGALG00000002893	5.94203	7.0347	4.03142	7.81059	12.5386	3.63684
ENSGALG00000002897	0.143263	0.333161	0.236857	0.556307	0.251849	0.295893
ENSGALG00000002899	19.9124	21.4192	19.9035	15.1499	25.3965	23.7404
ENSGALG00000002900	1.78829	0.994393	1.45945	1.98638	1.33068	4.96276
ENSGALG00000002904	10.9209	10.1758	12.7086	9.44773	9.81139	12.1819
ENSGALG00000002906	42.1276	44.917	42.2606	49.5324	44.3217	36.2359
ENSGALG00000002907	0.049838	0.0481219	0	0.213398	0.549239	0.108129
ENSGALG00000002908	6.71931	7.58589	8.20951	9.54381	10.2024	18.0786
ENSGALG00000002911	3.98005	2.49482	5.90173	4.38602	6.77452	3.14753
ENSGALG00000002913	36.6254	32.5013	35.1287	32.4328	35.22	30.0445
ENSGALG00000002919	8.75559	11.4564	11.7183	11.7952	12.9249	21.3969
ENSGALG00000002921	15.2537	15.1263	19.5886	14.901	19.3938	21.4927
ENSGALG00000002922	25.7579	26.5661	27.9132	25.7593	26.9547	34.4234
ENSGALG00000002925	62.9464	65.8729	60.3936	72.7106	60.9234	52.0764
ENSGALG00000002929	32.1358	30.983	28.5162	26.6123	27.7865	35.555
ENSGALG00000002932	440.202	436.481	420.61	488.448	434.465	335.471
ENSGALG00000002937	59.8454	54.5811	52.8124	55.9496	64.3279	81.5109
ENSGALG00000002942	9.32354	9.35517	8.17471	7.11793	7.91384	6.38365
ENSGALG00000002943	30.2252	34.2252	33.129	31.7579	33.6817	36.3348
ENSGALG00000002944	0.320401	0.460392	0.409086	0.588195	0.49488	1.06781
ENSGALG00000002945	1.76323	2.54781	1.82154	2.40806	2.34087	1.78666
ENSGALG00000002952	2.47428	3.46286	3.34287	4.16984	3.37638	1.98277
ENSGALG00000002954	8.25602	7.87929	8.19885	6.90704	6.79423	10.4617
ENSGALG00000002955	9.9558	12.0899	9.14917	10.8818	8.25429	5.85473
ENSGALG00000002957	0.0691473	0.0497212	0.111255	0.167908	0.218064	0.261023
ENSGALG00000002958	3.29029	1.62404	3.58046	3.15765	2.50905	5.8365
ENSGALG00000002959	10.7441	11.6444	12.3141	10.7978	10.9502	15.5192
ENSGALG00000002963	14.9588	15.5122	21.9423	12.7791	13.8628	12.8875
ENSGALG00000002964	9.87369	9.98721	8.96948	11.059	9.67763	18.4529
ENSGALG00000002967	9.89431	8.46524	9.81273	9.02502	11.0311	12.49
ENSGALG00000002968	3.13723	3.54502	2.80831	3.54838	3.41556	6.23639
ENSGALG00000002969	11.0171	10.782	10.4738	9.21555	10.4825	9.96709
ENSGALG00000002971	7.96287	8.37806	8.32148	8.21465	7.84591	4.72465
ENSGALG00000002973	20.4067	18.6941	20.4617	19.3469	20.1457	21.3877
ENSGALG00000002980	2.65792	2.81795	2.06337	2.85052	2.64758	2.79593
ENSGALG00000002981	6.00263	5.22008	4.87524	5.37733	5.37042	6.44782
ENSGALG00000002982	1.09702	0.88373	1.46992	1.30659	0.580039	1.25139
ENSGALG00000002984	25.908	26.0021	26.5628	30.2491	31.2669	33.671
ENSGALG00000002985	15.6252	13.5077	13.2196	17.3789	17.2778	33.8362
ENSGALG00000002987	9.07367	11.411	8.77533	6.53523	8.55933	8.78814
ENSGALG00000002988	0.776828	0.700282	0.676081	0.537579	0.637172	1.01432
ENSGALG00000002990	221.61	256.515	231.582	272.649	246.318	239.887
ENSGALG00000002992	0.468778	0.446161	0.529111	0.163763	0.445499	1.0539
ENSGALG00000002993	84.2139	78.1783	78.0965	77.5484	71.128	70.3418
ENSGALG00000003003	0.241928	0.157656	0.417151	0.0684977	0.162139	0.231314
ENSGALG00000003010	18.6883	18.2638	17.2303	21.5786	23.5737	25.2287
ENSGALG00000003011	23.4542	6.94713	3.68984	15.4247	13.8302	8.05249
ENSGALG00000003013	0.358264	0.528068	0.111924	0.214333	0.217582	1.01629
ENSGALG00000003014	0.0894615	0.103689	0.0737205	0.0743437	0.125003	0.229251
ENSGALG00000003015	135.544	115.327	101.759	86.9782	82.4776	68.2686
ENSGALG00000003016	0.127563	0.0242754	0.247505	0.080641	0.0506761	0.611918
ENSGALG00000003021	1.45477	1.7814	1.79247	1.55822	1.79968	1.5183
ENSGALG00000003022	0.915429	1.29213	0.686411	1.36604	1.0723	1.26006
ENSGALG00000003024	11.0567	12.9821	14.2157	12.2821	13.3884	21.1938
ENSGALG00000003025	0.473728	0.828659	0.798456	0.204293	0.582279	0.183214
ENSGALG00000003026	9.09807	8.90916	8.02665	7.21449	8.34226	4.5789
ENSGALG00000003029	14.805	18.0979	15.0892	15.2585	16.1713	27.9758
ENSGALG00000003031	9.82033	10.815	13.7814	12.6303	12.0785	31.0517
ENSGALG00000003033	5.95958	6.61605	6.50756	5.62177	6.09792	7.33535
ENSGALG00000003034	0.173607	0.701877	0.187733	0	0.366677	0.552674
ENSGALG00000003035	1.8832	2.28486	2.85546	4.54395	4.18568	10.3035
ENSGALG00000003039	20.3071	17.5756	17.0863	24.9623	23.7821	23.8874
ENSGALG00000003042	14.9734	15.2813	16.5424	17.766	17.2384	19.2354
ENSGALG00000003045	17.0855	20.853	15.8623	25.4778	27.6671	25.1009
ENSGALG00000003046	79.3638	93.5464	77.4624	90.0096	88.8784	77.1952
ENSGALG00000003047	9.97645	13.5177	8.6828	9.24209	9.67676	8.56649
ENSGALG00000003052	65.4173	77.1523	75.5335	67.511	82.4283	100.317
ENSGALG00000003053	126.615	158.931	188.659	162.179	163.275	231.249
ENSGALG00000003058	0.643288	1.12394	1.06035	0.684735	1.26469	2.35772
ENSGALG00000003059	8.62277	9.76616	13.8134	10.1505	10.1878	10.5604
ENSGALG00000003063	3.2286	2.85775	2.98181	2.85444	3.36489	3.02968
ENSGALG00000003065	3.33122	3.47815	3.49373	5.22777	4.13395	4.97229
ENSGALG00000003067	44.5398	47.8381	46.7925	49.2497	51.04	49.2862
ENSGALG00000003068	8.13061	7.9097	9.54144	8.8839	7.96092	15.0665
ENSGALG00000003071	7.36713	7.58902	7.21903	8.40303	8.69478	12.4701
ENSGALG00000003072	44.6936	45.7055	41.6229	50.5623	55.1657	57.2224
ENSGALG00000003073	0.934106	0.656883	0.405856	0.758319	0.741557	0.668174
ENSGALG00000003074	11.4932	12.3899	11.5045	12.5488	15.044	22.201
ENSGALG00000003076	0.09458	0.182409	0.42104	0.407894	0.360728	0.205391
ENSGALG00000003078	70.1688	53.0406	46.6605	65.4217	79.5216	45.0669
ENSGALG00000003079	25.4329	24.1841	27.7289	28.5945	28.4328	40.0961
ENSGALG00000003081	26.1136	23.1887	21.7963	20.6158	24.0209	31.8549
ENSGALG00000003082	10.5806	11.8902	10.3622	12.338	11.2295	11.5199
ENSGALG00000003084	37.3799	35.1646	37.319	43.9304	42.4918	38.3657
ENSGALG00000003085	64.2325	83.4245	85.926	90.0881	114.042	125.6
ENSGALG00000003086	12.4569	12.7617	12.3766	13.5784	11.6971	13.0371
ENSGALG00000003091	12.5433	11.4636	11.2362	12.5315	15.5254	18.892
ENSGALG00000003092	52.3111	55.3898	54.0135	51.3726	58.6922	70.9837
ENSGALG00000003096	2.29221	2.52614	3.17281	2.88346	3.63581	9.83667
ENSGALG00000003099	6.09534	6.8313	7.70357	5.86751	6.0907	10.5261
ENSGALG00000003101	16.2653	19.8156	21.669	20.345	21.3684	36.1807
ENSGALG00000003103	2.19107	2.2472	2.27242	1.4398	1.51488	1.17027
ENSGALG00000003106	67.9272	63.9675	51.6895	69.8696	57.2943	34.9658
ENSGALG00000003107	12.2558	13.0125	13.5798	13.4158	13.5767	16.9945
ENSGALG00000003108	16.8139	16.2596	17.0697	16.972	16.5641	21.5636
ENSGALG00000003111	7.52463	8.39811	8.67934	7.41529	8.27441	11.3539
ENSGALG00000003113	3.07258	4.16291	4.23967	3.83163	3.55741	3.93229
ENSGALG00000003114	14.6843	15.5224	12.1379	17.0966	12.4221	14.5636
ENSGALG00000003118	5.53467	6.27037	6.55397	4.65242	6.59822	5.27567
ENSGALG00000003120	18.7541	16.6021	17.2512	15.9687	18.9637	12.1423
ENSGALG00000003122	14.6425	17.3062	23.4626	22.4856	21.9261	71.7972
ENSGALG00000003123	4.79341	3.72182	5.2551	3.9895	4.53605	2.89885
ENSGALG00000003124	4.57376	4.03167	3.68456	4.42353	3.84082	5.09828
ENSGALG00000003126	0.738254	0.795769	0.97363	0.437506	0.970916	5.78332
ENSGALG00000003128	30.5743	29.3473	22.3423	23.9694	28.864	16.8498
ENSGALG00000003129	8.34392	9.0928	9.3488	8.24799	9.61113	14.0754
ENSGALG00000003130	17.3507	17.9725	17.7561	18.2395	19.5032	29.6527
ENSGALG00000003131	5.85026	5.90993	3.7692	3.61145	4.55492	5.42688
ENSGALG00000003134	0	0.374632	0	0	0.197208	0
ENSGALG00000003135	5.32188	4.70332	5.15741	4.73933	5.30674	11.9773
ENSGALG00000003136	1.17075	2.17552	1.40519	1.52499	1.78633	4.78754
ENSGALG00000003137	2.27579	2.33332	2.56271	3.49234	5.25866	1.30487
ENSGALG00000003138	0.240029	0.0383468	0.571969	0.10787	0.305497	3.72882
ENSGALG00000003142	0.1892	0.061295	0	0.16726	0	0.0633654
ENSGALG00000003143	19.6832	21.608	21.9114	21.204	23.8146	26.4817
ENSGALG00000003144	32.12	29.1725	21.8008	23.2236	26.6337	16.0302
ENSGALG00000003146	5.97045	6.0081	7.02676	8.29909	8.53517	14.2639
ENSGALG00000003147	29.8636	31.1381	28.8491	25.5512	27.7528	43.8576
ENSGALG00000003148	2.31275	3.27583	4.13514	3.54803	3.95834	10.6732
ENSGALG00000003149	2.61098	2.19959	1.89861	3.17253	3.22876	1.48196
ENSGALG00000003153	61.0363	61.6311	63.368	71.6049	82.9986	78.0796
ENSGALG00000003154	7.97791	8.13243	11.7719	10.463	10.6038	10.3781
ENSGALG00000003155	1.15091	2.15084	2.05582	2.04862	1.89161	2.27702
ENSGALG00000003160	10.0561	11.1594	16.4738	14.7313	16.9602	34.2071
ENSGALG00000003161	7.33322	8.25396	10.7919	11.4068	11.0186	16.0899
ENSGALG00000003162	22.5411	17.8519	18.6238	17.278	21.2537	26.2808
ENSGALG00000003163	14.1412	12.4684	7.25929	13.9475	13.8815	5.12068
ENSGALG00000003164	0.284105	0.555887	0.651074	0.145338	0.28759	1.31627
ENSGALG00000003165	11.6479	12.8609	11.9981	10.1267	12.768	13.9714
ENSGALG00000003168	8.06101	8.05105	7.42479	5.60441	8.16061	16.3343
ENSGALG00000003169	58.0623	70.1855	63.453	60.4203	54.3911	40.6953
ENSGALG00000003172	6.18883	5.92882	7.5302	5.62424	4.75434	9.18708
ENSGALG00000003175	3.14931	2.68754	3.78162	1.87722	3.98813	15.6548
ENSGALG00000003176	0.111009	0.181042	0.0766696	0.0310222	0.111267	0.830796
ENSGALG00000003179	1.20872	0.284082	0.0865893	0.609623	0.544554	0.11928
ENSGALG00000003181	17.1089	21.6443	19.1507	20.082	18.9257	25.1776
ENSGALG00000003183	9.01551	9.15441	10.1761	8.37432	9.82589	10.7145
ENSGALG00000003185	49.3469	41.6545	48.1476	54.6238	47.2503	55.3657
ENSGALG00000003189	43.3447	49.9478	46.615	51.8828	49.3603	61.4843
ENSGALG00000003193	0.130333	0.314864	0.760022	0.739484	0.810138	2.10135
ENSGALG00000003194	21.7412	22.7823	26.1433	23.2515	29.5556	39.1147
ENSGALG00000003195	3.24351	3.21013	2.60081	3.06862	2.35383	2.61265
ENSGALG00000003196	7.32404	5.39666	8.36609	8.66212	3.32925	8.25832
ENSGALG00000003197	653.112	651.577	639.381	575.384	625.527	519.168
ENSGALG00000003199	44.7757	37.5235	47.3029	57.7444	40.7809	35.1046
ENSGALG00000003201	8.35817	7.02761	8.28641	7.50441	7.70875	8.04964
ENSGALG00000003203	3.59827	4.86129	3.87994	4.85295	3.36394	2.10029
ENSGALG00000003204	23.9131	30.0998	27.1513	29.9499	30.7324	35.631
ENSGALG00000003205	91.8824	109.865	107.334	113.714	110.259	141.654
ENSGALG00000003206	3.54257	3.55211	3.78574	3.82764	3.76151	5.29578
ENSGALG00000003208	18.6058	24.023	26.2883	24.7284	22.933	28.7172
ENSGALG00000003211	20.1592	21.0414	25.661	25.8795	24.1799	39.377
ENSGALG00000003212	0.968064	0.546151	0.35091	0.699899	0.393444	0.488099
ENSGALG00000003213	0.846993	1.10169	0.516182	0.774747	0.333378	1.42985
ENSGALG00000003217	1.75957	3.35108	4.84759	2.02275	4.27644	26.8899
ENSGALG00000003219	18.5323	19.43	17.4213	19.7679	16.8896	15.2018
ENSGALG00000003220	21.3393	23.4565	22.6766	22.2535	24.1475	35.5697
ENSGALG00000003221	28.2138	27.1994	23.5165	25.683	28.1826	23.8414
ENSGALG00000003226	7.65659	9.78366	8.92705	6.9438	12.2263	7.62309
ENSGALG00000003227	41.6095	46.1195	25.8788	29.5575	31.6082	16.8669
ENSGALG00000003228	39.0571	36.6071	41.3142	41.3058	44.4922	61.8759
ENSGALG00000003233	43.6595	32.1284	30.2266	37.8872	39.7288	43.4205
ENSGALG00000003235	5.19167	5.22672	4.78368	4.17209	5.04001	3.73893
ENSGALG00000003238	20.8062	24.0695	22.2118	18.8024	22.6516	19.5392
ENSGALG00000003241	3.56889	6.25289	5.68185	5.06286	5.61247	7.60348
ENSGALG00000003242	297.24	115.69	97.3264	151.219	177.272	68.8111
ENSGALG00000003243	6.74696	7.42758	8.27575	6.5983	7.78293	8.09043
ENSGALG00000003245	25.0417	25.6903	24.2005	28.9717	27.9298	34.4971
ENSGALG00000003247	17.7379	21.8783	23.5987	21.799	20.9454	15.4279
ENSGALG00000003248	37.7173	34.5008	28.9598	30.0768	34.1455	19.6671
ENSGALG00000003249	27.9228	31.5267	29.3027	33.4098	31.2295	37.0206
ENSGALG00000003250	19.187	17.3347	17.4129	23.5361	18.892	20.1022
ENSGALG00000003254	18.7819	22.0999	21.088	22.2986	23.1559	30.8503
ENSGALG00000003256	32.9238	27.902	38.0885	28.6591	33.3686	56.6355
ENSGALG00000003258	1.52591	2.11427	1.89286	2.48861	1.90094	2.93552
ENSGALG00000003259	11.5876	10.8626	9.71348	10.9396	11.2187	15.7395
ENSGALG00000003260	17.2029	15.8401	18.6735	16.8725	18.7535	34.3068
ENSGALG00000003261	112.575	206.111	182.856	90.8525	107.844	110.844
ENSGALG00000003265	48.6279	49.537	51.5262	60.7913	54.7176	66.1125
ENSGALG00000003267	26.9034	35.2326	33.3913	28.4365	30.3256	44.6519
ENSGALG00000003272	20.1794	21.1387	20.3066	19.6717	24.0323	18.2838
ENSGALG00000003273	10.7578	10.4799	11.0756	11.3587	11.6969	24.5945
ENSGALG00000003281	19.2677	20.6758	20.1218	21.481	22.3148	26.516
ENSGALG00000003282	15.1077	21.6087	23.0614	20.1786	15.9414	30.36
ENSGALG00000003283	1.008	0.444846	0.832304	0.535096	0.644213	0.700447
ENSGALG00000003284	20.7333	20.0717	22.604	22.502	19.4601	32.9827
ENSGALG00000003285	0.235079	0.117599	0.108828	0.0994414	0.137758	0.161969
ENSGALG00000003286	0.389526	0.33319	0.0592075	1.03363	0.957726	0.890203
ENSGALG00000003287	11.6566	13.5861	12.4329	13.2474	13.1015	16.7827
ENSGALG00000003288	15.1533	15.1119	17.4487	15.1468	17.2245	24.6438
ENSGALG00000003293	37.8215	39.4126	38.8433	33.0186	36.4861	34.0429
ENSGALG00000003294	3.0788	3.23044	1.85896	2.47537	3.10392	2.85411
ENSGALG00000003295	2.35998	3.44919	1.79298	1.01925	2.3676	1.75408
ENSGALG00000003297	22.9311	26.3131	22.122	25.0454	26.5899	23.6712
ENSGALG00000003298	6.40876	6.19095	5.3145	5.79053	6.04977	5.47187
ENSGALG00000003299	10.1899	10.7944	9.73849	8.66011	10.2256	15.397
ENSGALG00000003301	1.72595	1.86583	2.10322	3.34276	7.73739	5.93837
ENSGALG00000003304	6.8705	8.71175	8.0071	7.58922	8.49928	11.8561
ENSGALG00000003307	170.808	157.189	144.909	165.715	147.026	114.661
ENSGALG00000003308	21.1716	21.5461	20.8804	22.5412	24.6857	30.7449
ENSGALG00000003313	3.77939	3.79868	4.27	4.2298	3.99947	5.03882
ENSGALG00000003314	22.6783	20.9242	18.5116	17.243	24.1156	14.4179
ENSGALG00000003318	6.23554	7.27535	7.3022	7.50881	7.73772	8.06171
ENSGALG00000003319	0.884416	0.603611	0.983252	1.20731	0.704241	0.870871
ENSGALG00000003321	21.3856	21.798	23.5034	25.1363	23.3802	16.7128
ENSGALG00000003322	14.5075	16.2158	13.9319	11.0473	13.5875	10.8631
ENSGALG00000003323	3.05454	2.26474	3.584	3.48624	2.38987	3.69415
ENSGALG00000003324	4.63912	3.58306	6.5977	7.8336	4.0407	2.99469
ENSGALG00000003325	7.92095	9.95042	12.4298	10.5636	12.1288	34.2903
ENSGALG00000003326	3.97668	3.99664	4.55882	3.92	3.92246	3.39908
ENSGALG00000003329	13.737	13.3863	12.4738	14.3813	12.5344	13.3228
ENSGALG00000003331	32.4941	35.0034	37.0027	32.5091	38.1665	75.0996
ENSGALG00000003333	7.2872	6.76159	6.81129	6.90254	5.18329	7.92555
ENSGALG00000003336	2.10296	1.37234	1.24494	1.15095	1.30521	0.693246
ENSGALG00000003337	98.7833	99.0715	104.285	104.428	108.928	151.167
ENSGALG00000003339	5.71945	5.93854	6.15622	5.63784	6.56687	9.84785
ENSGALG00000003340	4.16328	4.46446	5.14288	4.60795	3.79086	5.35993
ENSGALG00000003344	133.314	148.469	155.453	140.592	159.459	227.077
ENSGALG00000003345	2.11501	2.11594	1.4314	1.72715	1.09018	1.74852
ENSGALG00000003348	76.3691	95.0604	70.5935	102.608	65.9376	68.0475
ENSGALG00000003349	3.3893	3.78438	4.28743	3.04085	3.40182	16.0534
ENSGALG00000003353	13.508	10.7916	9.2182	11.5001	10.7114	6.95889
ENSGALG00000003354	0.862591	0.86827	0.434318	0.719245	0.85869	0.396942
ENSGALG00000003355	21.8848	24.6243	21.4843	26.6555	25.5539	32.4621
ENSGALG00000003356	11.5498	14.2708	12.5583	14.3795	12.9727	15.0796
ENSGALG00000003357	18.3168	22.2599	19.3519	23.3711	22.6968	32.3558
ENSGALG00000003358	35.0795	30.8709	32.1563	29.174	30.8534	34.1248
ENSGALG00000003359	187.108	165.421	176.647	183.436	201.462	192.317
ENSGALG00000003360	2.26178	2.06791	2.61221	1.8777	2.39507	3.07122
ENSGALG00000003361	0.29259	0.283402	0.261217	0.240221	0.114075	0.888719
ENSGALG00000003362	8.51851	12.0108	10.6477	10.3566	9.44695	13.6732
ENSGALG00000003365	5.37019	4.78697	5.31115	5.88789	5.15106	7.11167
ENSGALG00000003369	13.5511	15.6736	15.7838	16.3038	14.4985	17.9767
ENSGALG00000003370	22.7782	30.9083	28.0766	29.1261	35.3504	80.6901
ENSGALG00000003373	17.9434	18.2152	17.7335	18.9253	18.9614	23.5978
ENSGALG00000003374	0.534322	1.25334	1.42439	1.22736	1.29772	6.46694
ENSGALG00000003377	7.47374	7.27813	7.59412	8.27708	7.87655	8.29063
ENSGALG00000003378	2.85777	2.22272	1.85444	2.05249	2.52983	1.36673
ENSGALG00000003381	5.93138	5.98666	4.58445	4.51101	4.99733	6.88055
ENSGALG00000003383	29.7392	29.9338	35.0782	28.2439	33.2624	53.4633
ENSGALG00000003385	22.2625	21.1715	18.6595	24.9693	28.7489	37.1831
ENSGALG00000003387	7.05136	7.07011	7.51642	7.07743	7.41268	12.294
ENSGALG00000003391	9.41099	9.15593	10.8425	10.4605	11.5229	13.4553
ENSGALG00000003392	20.8225	21.7231	20.6298	18.3225	20.8798	25.9554
ENSGALG00000003396	9.46965	9.60804	10.0217	7.36268	8.65529	5.96793
ENSGALG00000003397	16.4161	17.7821	18.8509	17.3308	19.7345	25.4677
ENSGALG00000003398	21.1615	20.8655	22.3411	19.1796	21.6884	32.3643
ENSGALG00000003400	31.91	42.439	33.4971	40.3534	41.6257	59.0931
ENSGALG00000003403	0.525114	1.31387	1.93612	1.02427	1.07699	14.0768
ENSGALG00000003405	15.9975	19.5775	19.4426	19.6696	19.4931	37.6932
ENSGALG00000003408	7.97031	8.92775	7.10461	7.00581	7.12072	7.42914
ENSGALG00000003409	4.01508	4.25347	4.275	3.98374	4.39885	2.85414
ENSGALG00000003412	5.37082	6.694	6.07571	5.91542	6.94059	5.32235
ENSGALG00000003416	12.4041	12.9015	12.9976	14.4554	12.7685	18.6061
ENSGALG00000003419	3.29736	4.13718	5.02988	3.88736	4.40148	5.20553
ENSGALG00000003420	6.06422	6.24355	6.71289	6.24833	7.29528	5.70944
ENSGALG00000003425	0.0564498	0	0.176072	0	0.057209	0.320897
ENSGALG00000003426	0.572418	0.669726	1.2437	0.560796	0.859263	5.05693
ENSGALG00000003427	9.56378	12.1141	13.9712	9.81631	13.4281	25.4527
ENSGALG00000003428	21.5411	27.1796	28.8933	26.4255	24.3312	26.3672
ENSGALG00000003429	19.6727	21.127	22.1705	18.9562	20.6008	18.6514
ENSGALG00000003430	7.97601	7.38519	7.42558	6.7836	7.9483	10.8028
ENSGALG00000003432	5.28589	4.9003	4.45083	5.35323	3.96916	2.96743
ENSGALG00000003433	5.05858	11.2627	14.3715	5.20939	6.70609	16.1391
ENSGALG00000003434	14.6533	14.0441	11.9671	15.634	14.724	12.4167
ENSGALG00000003435	0.451324	0.76646	0.591243	1.03823	0.903625	1.92795
ENSGALG00000003438	27.7809	29.8158	32.7787	35.6777	40.7627	60.5572
ENSGALG00000003439	14.9599	18.8627	18.0383	18.2246	20.2936	28.3484
ENSGALG00000003441	3.07967	3.81607	3.04191	4.11305	3.11261	3.98133
ENSGALG00000003443	6.265	7.67875	3.64859	7.41137	5.29639	4.42077
ENSGALG00000003445	101.994	104.616	108.095	123.483	98.3916	61.3447
ENSGALG00000003446	0.747802	0.805824	0.363491	0.226802	0.395615	0.196946
ENSGALG00000003447	6.92749	6.15227	6.99524	8.2926	7.24961	8.65652
ENSGALG00000003454	63.6166	71.8301	71.1499	75.4952	70.2799	65.7388
ENSGALG00000003457	19.3134	20.0229	22.6362	16.0977	19.8339	25.3525
ENSGALG00000003458	18.6266	19.9413	19.1689	20.2379	21.1041	24.6071
ENSGALG00000003461	4.86756	4.50067	3.65417	3.4641	2.91926	2.77375
ENSGALG00000003464	0.13178	0.191859	0.167057	0.151025	0.108372	0.369778
ENSGALG00000003466	3.6134	3.69929	3.64623	6.38488	3.3468	4.24211
ENSGALG00000003467	21.0567	25.1008	23.5606	24.8703	23.6744	40.4468
ENSGALG00000003470	0.446511	0.21498	0.613118	0.253036	0.398216	0.804506
ENSGALG00000003472	4.19103	3.27114	3.65207	3.861	2.0575	1.94774
ENSGALG00000003473	16.8687	16.5405	18.8419	17.9019	26.2912	27.1557
ENSGALG00000003474	30.9742	35.2043	31.3053	39.5063	36.7033	44.8737
ENSGALG00000003475	37.965	38.2306	41.1869	34.4506	52.134	56.6876
ENSGALG00000003476	6.6109	6.82003	7.07138	6.98993	7.37776	7.98442
ENSGALG00000003478	0.26111	0.0319361	0.0342409	0.114722	0	0.0314823
ENSGALG00000003483	55.0064	58.4246	58.3257	61.1765	64.5756	86.1402
ENSGALG00000003484	7.34219	9.91275	8.63895	9.78429	10.3273	24.3567
ENSGALG00000003485	16.8531	15.5761	17.2815	18.6229	19.4767	32.6887
ENSGALG00000003487	25.134	25.9335	28.2792	20.8542	27.0633	31.0414
ENSGALG00000003492	26.6715	30.8599	27.5421	33.623	31.5195	36.6348
ENSGALG00000003495	74.0126	84.8375	84.6273	93.553	89.8733	86.8585
ENSGALG00000003496	10.4259	10.5115	10.7624	10.9559	9.66177	13.3159
ENSGALG00000003498	9.78434	10.9985	9.3867	11.4171	10.0785	12.2085
ENSGALG00000003499	1.94038	2.50352	2.75385	1.96883	1.85179	1.65949
ENSGALG00000003500	3.97811	4.70277	3.0069	3.39195	3.18397	5.49623
ENSGALG00000003503	12.4564	14.313	14.4383	16.4652	19.1747	42.6595
ENSGALG00000003505	5.79697	7.00011	5.36562	6.88534	5.95711	7.35987
ENSGALG00000003507	3.5681	4.35315	4.21477	3.77907	4.39495	5.98553
ENSGALG00000003509	0.304706	0.699985	0.117791	0.482469	0.227367	1.96419
ENSGALG00000003510	61.3959	82.1237	80.1845	76.3166	84.2007	155.919
ENSGALG00000003517	14.1224	17.3216	15.9228	22.9096	20.9195	30.4217
ENSGALG00000003518	18.5522	19.6302	20.5967	20.6018	20.249	27.6483
ENSGALG00000003520	9.09883	9.17131	8.55202	4.50453	4.15481	9.19638
ENSGALG00000003521	242.956	219.762	242.547	227.948	270.135	200.689
ENSGALG00000003522	132.821	157.934	159.109	166.153	184.497	204.605
ENSGALG00000003523	15.6391	21.1435	17.0945	21.1307	20.6775	30.9705
ENSGALG00000003526	11.4735	12.3469	12.5393	10.95	10.5956	11.9971
ENSGALG00000003527	9.47428	10.5842	13.9115	7.31231	10.3527	30.4824
ENSGALG00000003529	3.74655	4.43469	3.36833	4.6288	4.62661	4.20839
ENSGALG00000003532	228.16	229.206	208.253	224.838	210.71	173.446
ENSGALG00000003533	6.33626	6.2101	8.18048	6.82534	6.54046	10.058
ENSGALG00000003536	22.8542	25.5712	25.1805	21.2768	24.9581	32.1221
ENSGALG00000003537	61.0651	53.3721	80.0292	69.6754	69.8975	224.208
ENSGALG00000003539	16.6898	12.6051	19.5175	19.0421	18.2725	25.438
ENSGALG00000003540	3.27271	3.40853	3.64144	4.19625	3.84514	4.37164
ENSGALG00000003545	0.0966263	0.140248	0.155462	0	0.101429	0.049014
ENSGALG00000003547	105.422	86.6837	56.0093	98.6788	88.4405	45.9842
ENSGALG00000003548	7.72264	10.4738	9.73699	8.83371	12.273	27.4437
ENSGALG00000003549	18.013	14.6894	11.3955	13.3605	9.87834	10.8523
ENSGALG00000003550	24.8222	21.7374	13.5486	21.8303	17.5894	14.7027
ENSGALG00000003553	0.178065	0.131306	0.0858183	0.19945	0.0641412	0.13903
ENSGALG00000003554	3.93878	2.67877	4.91155	6.64704	3.71441	4.47942
ENSGALG00000003558	40.8141	43.1248	32.1509	40.2148	32.1969	24.315
ENSGALG00000003559	7.77647	9.83911	13.3331	9.84536	11.9027	55.498
ENSGALG00000003560	1.03969	0.616131	0.637265	0.321214	0.820607	0.718851
ENSGALG00000003562	12.6642	14.3589	12.8523	14.7569	12.8145	27.6934
ENSGALG00000003563	19.818	18.6094	17.6861	20.4428	21.6136	25.5034
ENSGALG00000003566	4.90165	5.81153	4.56927	3.7897	5.11742	8.13426
ENSGALG00000003567	22.6412	11.1827	13.9647	25.728	17.8841	15.9772
ENSGALG00000003568	8.04675	6.81139	4.09696	5.11351	5.70187	6.27235
ENSGALG00000003569	27.2425	23.8474	28.5881	29.3693	25.9107	25.7934
ENSGALG00000003570	70.9195	63.1258	68.0837	60.9576	51.3291	47.5201
ENSGALG00000003572	5.54818	6.67189	8.12885	6.51476	6.92347	25.3977
ENSGALG00000003573	0.267812	0.103895	0.114081	0.141414	0.0556038	0.213882
ENSGALG00000003574	30.4006	31.2824	28.6293	26.1834	31.9286	42.0002
ENSGALG00000003575	6.90892	8.06064	10.8957	10.0994	7.81516	10.3825
ENSGALG00000003578	91.0471	99.5033	97.5655	78.1637	100.628	73.0307
ENSGALG00000003580	67.4853	58.5867	85.1702	45.2475	54.5162	37.0237
ENSGALG00000003582	4.42395	4.0404	3.69262	3.5693	3.21198	2.7291
ENSGALG00000003584	106.504	123.763	129.353	118.807	165.592	197.687
ENSGALG00000003588	0.152698	0.194717	0	0	0	0.707102
ENSGALG00000003589	1.65709	13.8189	6.31554	3.03037	2.01094	6.58085
ENSGALG00000003590	9.12634	9.76836	12.1794	10.9305	12.2967	20.6204
ENSGALG00000003594	0.165747	0.304528	0.237363	0.417623	0.201329	0.456606
ENSGALG00000003595	0.109536	0.356301	0.313846	0.164105	0.115973	0.381589
ENSGALG00000003596	9.37591	11.0565	9.03605	7.74445	9.1087	6.31083
ENSGALG00000003597	33.1103	36.9218	34.2997	39.2109	40.2983	43.9223
ENSGALG00000003601	24.5558	26.3933	29.9703	22.089	31.7069	37.5904
ENSGALG00000003602	0.644936	0.971195	0.650466	0.685665	0.999157	1.83623
ENSGALG00000003604	3.88716	5.1591	5.77814	5.94585	4.23213	5.06874
ENSGALG00000003605	4.43936	5.03951	3.5679	3.34581	3.9929	2.9433
ENSGALG00000003614	3.81042	2.72347	3.52676	2.89954	3.50001	2.80924
ENSGALG00000003624	0.389259	0.248935	0.206393	0.302535	0.178357	0.274931
ENSGALG00000003625	49.0254	52.5757	47.2417	56.7823	48.3816	33.6189
ENSGALG00000003628	7.60543	8.36583	6.25011	6.01569	7.05423	5.70819
ENSGALG00000003631	1.24103	1.70602	1.27434	1.21951	1.39895	2.2774
ENSGALG00000003634	22.6138	24.4715	27.1109	19.0099	23.4536	20.8798
ENSGALG00000003636	1.86845	1.22418	2.05331	1.56665	0.926903	0.942057
ENSGALG00000003641	9.32717	9.25971	8.15206	7.41933	8.45543	6.48308
ENSGALG00000003642	24.0028	22.5282	27.2509	22.1878	24.5268	24.9388
ENSGALG00000003644	3.23812	1.80416	4.86564	4.48666	2.74876	22.407
ENSGALG00000003645	7.5681	11.884	9.17751	8.33555	10.2474	20.6204
ENSGALG00000003648	21.238	22.4262	23.2955	21.5314	20.4943	34.1475
ENSGALG00000003650	14.2276	14.3447	13.5559	13.1793	14.0029	12.1987
ENSGALG00000003651	9.73103	8.525	10.8538	12.8796	12.5699	15.1511
ENSGALG00000003652	20.4548	20.0476	22.4833	21.6407	22.5258	25.0455
ENSGALG00000003655	13.0853	13.0868	13.6841	13.9092	13.8735	18.3475
ENSGALG00000003657	1.93361	1.75699	1.13959	1.54699	1.98377	1.42135
ENSGALG00000003658	3.07498	3.57355	3.3251	2.7235	3.21034	3.77915
ENSGALG00000003660	7.59708	8.1339	10.4966	11.472	11.8781	27.2663
ENSGALG00000003661	7.69853	7.79915	4.26507	6.15566	6.27691	4.10001
ENSGALG00000003663	4.38499	5.06648	5.69181	5.03687	4.56108	3.35588
ENSGALG00000003665	46.9524	49.1962	43.2789	57.1899	39.4263	71.988
ENSGALG00000003670	12.4867	13.6199	21.2926	11.8267	7.46264	8.6598
ENSGALG00000003672	14.2351	15.8436	15.403	15.772	16.9541	18.1549
ENSGALG00000003674	10.1692	10.5769	14.7169	14.4484	10.8438	11.3904
ENSGALG00000003675	14.3656	14.6148	17.366	15.358	17.5469	18.4624
ENSGALG00000003677	3.69039	4.99369	4.28198	3.90675	5.18523	2.22221
ENSGALG00000003681	25.0153	24.3616	22.9052	22.6793	24.3326	15.2452
ENSGALG00000003682	15.4852	16.7843	17.7201	19.4594	15.815	21.8166
ENSGALG00000003683	18.51	23.7632	20.0601	22.0211	24.5682	35.2103
ENSGALG00000003684	8.59419	11.4123	10.0808	13.4252	11.5916	16.1206
ENSGALG00000003687	6.41436	5.98997	3.58305	6.61469	5.85307	5.3214
ENSGALG00000003688	9.39528	10.7553	8.88395	10.5942	11.8139	12.7487
ENSGALG00000003689	3.36602	7.19287	9.8495	3.5232	4.11581	3.10621
ENSGALG00000003690	14.8648	30.7253	21.6143	62.7466	28.4967	9.07131
ENSGALG00000003691	17.6946	16.1791	21.0097	17.4772	22.4496	28.1023
ENSGALG00000003693	9.6413	11.561	11.6201	11.2729	11.0008	10.2878
ENSGALG00000003695	8.27079	8.29033	10.2786	8.83371	12.8985	31.9233
ENSGALG00000003696	17.1291	20.2622	20.4853	19.3917	20.8994	39.9909
ENSGALG00000003699	3.54716	3.84442	3.56322	2.52819	3.70006	2.81737
ENSGALG00000003701	8.3043	7.06969	9.53802	8.02804	7.83352	7.81596
ENSGALG00000003702	31.2015	29.8965	32.1018	30.4264	31.8961	29.8682
ENSGALG00000003703	11.9368	10.0752	11.0549	11.2343	11.4395	14.8598
ENSGALG00000003705	2.6201	2.55849	1.80543	1.68305	2.05699	2.01035
ENSGALG00000003708	6.26482	5.78817	6.38283	5.45179	5.77801	5.26876
ENSGALG00000003709	8.49832	15.3796	15.4814	5.32812	9.90586	12.82
ENSGALG00000003712	8.33897	9.6034	10.1664	9.15996	9.55478	12.5299
ENSGALG00000003716	1.41453	0.713822	0.846896	1.42426	0.719823	0.712905
ENSGALG00000003717	10.7136	11.9973	9.49591	11.4768	10.5401	12.7952
ENSGALG00000003720	4.52048	4.12831	4.38253	4.88184	5.75547	6.58799
ENSGALG00000003722	11.4157	11.377	11.3296	9.74439	10.558	11.9983
ENSGALG00000003726	36.3767	39.0937	34.7284	28.557	42.0549	22.3663
ENSGALG00000003727	8.7964	9.25152	11.2664	9.14648	11.8267	28.9609
ENSGALG00000003731	9.05162	10.1571	10.3437	9.19923	9.82124	14.3374
ENSGALG00000003732	11.4318	13.2322	11.8355	13.5261	12.8272	13.6723
ENSGALG00000003733	4.95938	7.12285	1.976	3.07094	3.50875	2.15291
ENSGALG00000003734	23.0389	22.0365	22.2922	25.492	23.5937	37.3696
ENSGALG00000003736	3.57383	4.26133	4.1756	3.18778	3.9229	4.66649
ENSGALG00000003738	42.4796	40.4121	46.7241	46.5443	42.9163	68.5629
ENSGALG00000003741	17.3096	21.2773	20.7816	21.6708	21.5876	17.8631
ENSGALG00000003742	5.06215	4.26308	4.16437	4.41399	3.26561	6.30402
ENSGALG00000003743	10.312	10.3057	9.38093	8.06867	8.40012	11.5784
ENSGALG00000003744	0.626811	0.214701	0.789537	0.685963	0.882137	5.35415
ENSGALG00000003745	25.5647	29.0321	32.8772	32.2109	33.0422	47.5879
ENSGALG00000003747	16.7737	18.5612	16.0963	16.4261	18.9943	11.4752
ENSGALG00000003748	16.4572	16.5569	12.4983	13.3159	12.9648	9.05235
ENSGALG00000003750	4.23076	5.15298	6.31093	5.26356	5.10279	5.99492
ENSGALG00000003753	3.99159	3.98428	3.49798	3.29586	3.44659	9.65694
ENSGALG00000003757	19.7356	12.714	20.272	17.7388	18.9549	18.9053
ENSGALG00000003758	3.04761	3.37695	2.74552	3.37822	2.64765	3.68081
ENSGALG00000003759	1.11679	1.45021	1.02343	0.739248	0.890657	2.28607
ENSGALG00000003766	6.1654	6.87281	7.41299	6.85644	6.40373	7.82071
ENSGALG00000003767	4.39519	3.29419	3.17491	2.68288	3.09486	2.41284
ENSGALG00000003770	139.908	161.347	171.48	110.331	93.096	99.2713
ENSGALG00000003771	8.28306	8.65389	8.36435	8.25159	8.42854	9.85211
ENSGALG00000003774	9.8086	9.26427	11.968	10.2662	8.93111	7.43201
ENSGALG00000003775	9.06696	7.89449	3.95702	5.40251	4.00558	4.90958
ENSGALG00000003777	0.326406	0.381136	0.901238	0.263788	0.451577	3.96299
ENSGALG00000003778	14.5611	15.3552	15.8435	17.639	17.0518	31.3801
ENSGALG00000003781	21.2425	23.6066	26.2113	23.713	23.1305	39.3902
ENSGALG00000003786	19.8986	20.092	19.6195	22.6365	22.4475	24.3905
ENSGALG00000003788	18.3966	19.4104	18.8932	15.9395	20.6027	29.1596
ENSGALG00000003789	0.891669	0.472896	0.873332	0.785387	0.425493	0.686891
ENSGALG00000003792	2.25849	2.17633	2.71518	1.75472	3.28117	2.29629
ENSGALG00000003793	50.1078	50.7367	48.3633	69.1489	55.5919	52.6394
ENSGALG00000003794	14.1675	16.7886	14.0553	16.6484	18.802	19.1156
ENSGALG00000003795	27.5219	26.676	29.4583	34.7461	31.2524	25.7293
ENSGALG00000003798	37.9715	47.4638	51.8857	48.4929	52.163	84.6265
ENSGALG00000003799	13.3194	13.9756	14.5578	14.9971	14.5171	20.4599
ENSGALG00000003800	11.8174	12.7256	14.8594	13.7888	16.4156	26.6119
ENSGALG00000003802	1.87045	2.10623	2.08673	1.83433	2.92352	3.34775
ENSGALG00000003803	121.917	111.288	144.341	96.6178	158.553	220.54
ENSGALG00000003805	28.8252	26.9326	21.3443	15.3185	25.23	17.3903
ENSGALG00000003806	359.017	353.355	368.184	362.337	374.481	333.347
ENSGALG00000003807	14.5597	13.1971	12.5345	14.2621	13.6935	12.759
ENSGALG00000003812	27.5284	29.8908	25.8377	20.6511	34.1433	21.4634
ENSGALG00000003814	0.215647	0.309945	0	0.195967	0.486116	1.85187
ENSGALG00000003815	135.51	147.358	134.07	162.138	158.272	123.157
ENSGALG00000003816	1.56662	1.13365	1.71476	1.73405	1.75066	1.28054
ENSGALG00000003818	0.449489	0.231242	0.502783	0.473899	0.27525	0.417509
ENSGALG00000003819	1.31794	1.98076	2.08316	2.63866	2.01562	7.4742
ENSGALG00000003820	95.5359	95.8971	97.1869	91.7861	96.0646	79.5664
ENSGALG00000003821	6.51557	4.9339	2.76032	8.36592	5.46527	4.80323
ENSGALG00000003824	15.0303	18.7076	19.1469	17.4942	18.6553	33.5335
ENSGALG00000003826	9.1041	9.7098	9.20569	9.27272	9.64855	8.80141
ENSGALG00000003829	0.232351	0.224337	0.530721	1.43381	0.276926	0.598932
ENSGALG00000003832	20.6091	21.712	23.4499	22.0989	20.5807	26.4057
ENSGALG00000003833	0.0893997	0.0491415	0.0448409	0.0576566	0.101701	0.191907
ENSGALG00000003836	0.318719	0.29164	0.455872	0.0740502	0.318753	2.23318
ENSGALG00000003837	0.542654	0.385707	0.865517	0.488866	0.395523	0.513695
ENSGALG00000003838	0.108816	0.208318	0.170638	0.860919	0.443153	0.541287
ENSGALG00000003841	0.0609871	0.107182	0.12594	0.0885446	0.14139	0.0401719
ENSGALG00000003845	19.4868	24.199	29.9359	20.9054	19.0891	29.654
ENSGALG00000003849	0.0652904	0.218387	0.164216	0.0365409	0.122226	0.716972
ENSGALG00000003851	15.0504	15.3337	17.053	18.3607	17.6206	25.7813
ENSGALG00000003854	4.39766	3.93062	4.66388	4.52882	5.27484	6.27272
ENSGALG00000003855	26.6831	21.8151	20.0238	27.3499	24.9413	17.8355
ENSGALG00000003859	5.67162	5.82113	8.86706	5.45992	5.94776	5.10258
ENSGALG00000003860	1.93923	1.96865	2.04619	2.52175	2.5746	2.16685
ENSGALG00000003861	9.23596	10.7419	10.7786	9.18715	10.6848	11.4911
ENSGALG00000003862	5.24584	6.62921	6.86933	4.34721	4.75188	8.03194
ENSGALG00000003863	1.2711	1.13454	1.60258	0.675013	1.76976	0.81496
ENSGALG00000003866	0.155938	0.09028	0.0676779	0.197886	0.266767	0.0993917
ENSGALG00000003870	12.5764	12.9826	14.2309	13.99	13.0357	31.1192
ENSGALG00000003875	21.0554	21.9373	24.5294	18.6534	22.4943	22.8058
ENSGALG00000003876	2.96312	3.53009	6.21825	2.75006	2.92295	9.53858
ENSGALG00000003878	71.6272	66.7043	62.4195	89.3022	73.0294	66.723
ENSGALG00000003879	7.99437	8.33221	8.0835	9.46935	10.2724	21.9393
ENSGALG00000003880	11.8932	12.7473	14.3057	14.1549	13.9543	18.5902
ENSGALG00000003881	3.93927	4.19577	4.24018	4.95881	5.16417	5.1676
ENSGALG00000003882	57.6848	76.8206	77.2015	62.7206	66.1752	86.8276
ENSGALG00000003883	13.9195	13.4655	13.1184	11.1852	11.7993	10.253
ENSGALG00000003885	1.13218	0.91999	1.93679	1.16229	1.17793	1.17865
ENSGALG00000003886	15.1381	20.3188	11.5049	10.0401	14.3937	6.44613
ENSGALG00000003891	10.5165	9.76853	10.7621	12.0342	8.50968	6.55393
ENSGALG00000003893	22.3457	22.2232	23.4455	23.2939	27.769	27.5263
ENSGALG00000003895	0.195799	0.0469613	0.832586	0.432455	0.559994	3.76245
ENSGALG00000003899	0	0.0434306	0.191832	0.03898	0.0897723	0.130422
ENSGALG00000003901	11.0194	6.32552	9.61283	9.50814	8.59402	14.1624
ENSGALG00000003904	0.619237	1.3627	0.647779	0.456755	1.94889	9.23394
ENSGALG00000003906	8.4985	9.32071	9.2418	8.77472	9.48925	14.4044
ENSGALG00000003907	22.1973	23.9768	22.6146	18.9537	22.2397	43.1924
ENSGALG00000003908	0.353933	0.220175	0.47747	0.227219	0.147446	1.60205
ENSGALG00000003909	19.1436	18.9791	20.0836	21.2761	20.9363	24.0348
ENSGALG00000003911	0.138042	0.243756	0.385671	0.215267	0.187935	0.78658
ENSGALG00000003913	2.9491	4.27242	4.25919	3.00678	4.07993	4.92824
ENSGALG00000003914	1.39739	3.24034	2.01747	2.73656	2.30471	7.48324
ENSGALG00000003916	18.5647	21.0507	22.1761	19.9307	18.4834	25.2124
ENSGALG00000003919	18.3102	18.6236	19.1094	21.4026	20.7864	26.8504
ENSGALG00000003920	3.99505	5.07775	5.4014	4.81633	4.60499	7.46543
ENSGALG00000003921	13.6755	14.1704	14.4382	10.855	12.8015	15.5698
ENSGALG00000003922	21.6737	26.8354	19.0256	31.191	34.3507	18.9812
ENSGALG00000003923	34.476	29.3116	44.776	15.9322	33.7678	23.5793
ENSGALG00000003924	22.3164	21.5809	23.1324	24.8689	25.9657	25.3499
ENSGALG00000003925	0.0927162	0.122779	0.215567	0.0977391	0.299353	1.2117
ENSGALG00000003928	0.159307	0.306863	0.684695	0.677468	0.336499	8.74411
ENSGALG00000003929	22.3379	22.1783	24.4342	28.4574	23.1653	26.8271
ENSGALG00000003930	4.21002	4.81689	4.79813	4.89906	7.0511	6.19125
ENSGALG00000003932	41.6231	53.3053	56.5439	42.2386	48.2397	80.2101
ENSGALG00000003933	31.8371	34.2849	37.3224	35.8839	34.5782	26.7066
ENSGALG00000003935	2.76407	2.47268	2.11355	1.97558	2.54798	2.8834
ENSGALG00000003936	61.3863	53.9224	53.832	58.2159	52.7266	44.3134
ENSGALG00000003937	8.80151	10.0804	10.3643	9.37181	11.4646	11.2014
ENSGALG00000003939	28.5788	32.625	23.7711	18.3998	27.5875	17.0747
ENSGALG00000003941	20.0235	22.7481	22.7872	19.9925	22.5326	29.6311
ENSGALG00000003942	19.8074	18.8357	20.9965	19.7876	20.1349	23.3837
ENSGALG00000003944	1.68308	1.90316	1.8368	1.40588	1.94497	3.3829
ENSGALG00000003947	105.735	98.0558	105.161	124.751	119.478	101.346
ENSGALG00000003948	80.6114	55.974	57.9227	62.6436	61.7624	107.039
ENSGALG00000003950	14.2679	16.3104	17.6095	14.1173	14.7746	20.9106
ENSGALG00000003952	1.88131	1.64937	1.54781	3.11626	2.62931	4.96389
ENSGALG00000003955	1.72849	2.84111	1.28268	1.34228	1.67025	1.29345
ENSGALG00000003958	7.28428	7.52826	6.90297	8.33629	8.83226	11.673
ENSGALG00000003959	23.933	25.5316	27.5265	22.7673	25.2825	41.1773
ENSGALG00000003966	785.305	827.18	761.19	695.636	730.197	662.047
ENSGALG00000003969	42.9594	42.0136	38.8375	44.4485	43.1903	39.7721
ENSGALG00000003972	0.917398	0.632523	0.631761	1.34528	0.761213	0.734186
ENSGALG00000003973	17.4457	20.575	18.4275	24.8143	18.0583	19.2429
ENSGALG00000003976	1.76268	2.27032	2.39808	1.93566	2.15935	5.54588
ENSGALG00000003977	17.628	20.5189	20.9916	23.2098	23.9085	25.5569
ENSGALG00000003978	0.15338	0.152517	0.480882	0.132277	0	0
ENSGALG00000003979	4.35491	4.64145	5.41628	5.46039	5.07242	10.1539
ENSGALG00000003980	0.282502	0.197137	0.277256	0.0675318	0.503859	0.0897861
ENSGALG00000003985	12.1089	10.6423	9.91253	11.2894	12.5967	20.2323
ENSGALG00000003986	15.3539	15.459	17.6161	18.619	18.1155	21.7774
ENSGALG00000003987	8.19996	8.74576	9.08756	13.9636	11.2126	16.4774
ENSGALG00000003990	5.63387	5.53095	4.36104	4.38977	4.09069	6.18881
ENSGALG00000003991	21.755	22.2962	21.2834	21.9763	23.6942	19.4228
ENSGALG00000003995	9.962	11.1686	11.1871	12.8212	12.8109	19.7707
ENSGALG00000003999	5.28725	5.40745	4.89078	5.58649	4.76975	3.81124
ENSGALG00000004002	56.8169	64.4533	67.6171	66.3807	75.5422	116.58
ENSGALG00000004003	26.3447	25.6314	26.5763	27.3754	30.2217	29.9908
ENSGALG00000004004	8.40476	9.82655	9.35356	8.77391	10.1935	15.7001
ENSGALG00000004005	40.9028	45.3697	37.9958	56.7631	36.8641	46.6996
ENSGALG00000004009	2.3582	1.90785	1.75428	1.67825	3.39362	1.46315
ENSGALG00000004017	9.41896	7.79864	5.8928	8.00633	9.1116	6.90402
ENSGALG00000004019	4.48165	5.09725	4.85576	6.15929	5.5384	14.4427
ENSGALG00000004028	0.809513	0.0781843	0.0870041	0.646579	0.454241	2.78408
ENSGALG00000004033	3.1824	2.85246	2.37405	2.27965	2.72956	1.91768
ENSGALG00000004034	61.8853	62.3149	60.6567	59.0393	68.3094	57.5563
ENSGALG00000004035	0.396582	0.988637	0.60253	0.198528	0.705765	0.283954
ENSGALG00000004037	7.8278	7.154	4.90833	8.07586	10.389	10.936
ENSGALG00000004038	6.69809	5.91991	5.422	5.30621	4.42312	3.86988
ENSGALG00000004039	47.5742	33.6688	46.8556	50.3263	48.56	47.0972
ENSGALG00000004040	36.0412	31.8671	33.633	33.1718	30.3377	31.9815
ENSGALG00000004042	9.32155	10.2944	9.91883	8.86885	11.3716	16.2441
ENSGALG00000004045	9.33544	11.0818	9.04992	9.32894	11.7864	10.5548
ENSGALG00000004046	4.43544	5.59392	5.75235	4.1406	5.25713	5.85167
ENSGALG00000004047	23.0819	26.047	25.2734	31.011	28.1427	36.6281
ENSGALG00000004048	15.1513	16.3977	20.6783	14.257	18.0035	11.5465
ENSGALG00000004049	15.6218	15.5448	15.2048	14.1297	15.5865	20.7204
ENSGALG00000004052	14.7181	14.3169	13.7341	13.2803	15.3471	17.6069
ENSGALG00000004055	16.8044	17.8057	18.692	17.3763	21.4088	31.7725
ENSGALG00000004057	19.2814	18.2319	18.6935	22.1454	19.8395	27.3233
ENSGALG00000004058	1.1698	1.30111	1.26331	1.00449	0.665728	1.06989
ENSGALG00000004059	1.30896	1.31342	2.28622	0.841897	1.12461	7.25314
ENSGALG00000004063	17.3813	19.8413	17.8793	18.307	20.4399	30.645
ENSGALG00000004064	0.571957	0.477804	0.427915	0.375841	0.512304	2.22912
ENSGALG00000004065	12.1362	11.3396	10.9758	10.8241	13.5764	16.1653
ENSGALG00000004066	0.742748	0.882399	1.15746	0.23896	0.213022	0.780804
ENSGALG00000004068	7.50281	7.58152	8.04979	7.84583	7.62712	12.5572
ENSGALG00000004070	14.0229	18.7989	16.8942	13.3914	18.2338	28.5322
ENSGALG00000004071	0.528887	1.18178	0.972892	0.33282	0.323845	0.385727
ENSGALG00000004074	0	0.117094	0.0436625	0.179906	0.128957	0.0835909
ENSGALG00000004078	0.603267	1.09643	2.62891	0.577788	1.38778	10.4046
ENSGALG00000004079	9.52244	10.0086	9.79006	9.74024	11.7698	10.2099
ENSGALG00000004081	1.70561	1.84582	1.86085	2.14084	0.675667	1.31358
ENSGALG00000004082	14.6631	14.7083	13.7649	12.4547	15.5397	17.8276
ENSGALG00000004083	0.0633983	0.0354217	0.1068	0.0108826	0.128213	0.473848
ENSGALG00000004085	9.98622	11.135	14.7865	9.36721	10.63	16.2265
ENSGALG00000004087	7.15478	8.7091	3.99743	3.49133	4.56794	3.54681
ENSGALG00000004088	7.41642	9.01919	9.75938	6.13208	7.4221	8.18387
ENSGALG00000004096	12.1542	9.67088	6.29381	9.72972	10.943	4.65215
ENSGALG00000004097	3.47651	3.5299	3.43884	3.00191	3.55147	4.41758
ENSGALG00000004098	20.4334	22.7751	20.4542	21.9011	26.4974	36.6048
ENSGALG00000004104	8.83099	9.09979	10.5386	9.65163	11.5094	13.8854
ENSGALG00000004106	25.3384	27.544	25.9447	21.3193	32.7497	29.0478
ENSGALG00000004107	470.582	447.317	428.203	418.37	419.863	354.3
ENSGALG00000004108	49.4306	45.7945	36.7739	33.4805	45.1356	29.5695
ENSGALG00000004110	16.7107	17.0396	21.0581	19.7612	24.9473	30.2219
ENSGALG00000004111	0.13882	0.237227	0.0971657	0.171986	0.23609	0.147952
ENSGALG00000004112	13.407	11.6568	10.3725	12.619	11.5643	8.62113
ENSGALG00000004113	2.48524	1.98188	2.16608	2.60361	2.14458	1.6615
ENSGALG00000004115	59.9702	60.0436	65.2524	62.6911	67.1125	80.2146
ENSGALG00000004116	0.502389	0.315275	0.388668	0.560266	0.42658	0.374839
ENSGALG00000004120	0.119919	0.231896	0.0623578	0.051293	0	0.0573081
ENSGALG00000004121	27.9991	28.0361	25.8474	25.0221	28.3058	28.3274
ENSGALG00000004122	52.1642	58.6798	57.068	58.0116	58.0503	51.2165
ENSGALG00000004123	3.85935	3.13108	5.80336	4.49887	4.78732	25.5283
ENSGALG00000004127	2.99256	1.9444	1.31577	2.42621	2.24701	4.57768
ENSGALG00000004128	5.49534	2.30326	2.7305	4.26272	2.53547	2.89939
ENSGALG00000004129	0.849039	0.779839	0.505715	1.70568	0.368115	0.408966
ENSGALG00000004133	26.5458	24.997	23.7403	24.2856	25.9103	20.8508
ENSGALG00000004140	34.7292	34.1989	35.6175	33.5645	35.5193	42.1559
ENSGALG00000004141	0.411425	0.630589	0	0	0	0
ENSGALG00000004143	205.678	200.317	201.661	209.055	241.612	267.973
ENSGALG00000004144	13.2871	13.7512	12.0587	13.4441	16.2903	14.764
ENSGALG00000004146	0.314956	0.189622	0.170705	0.245356	0.377203	0.491954
ENSGALG00000004150	2.17997	2.09577	2.10279	1.58728	1.81698	2.39868
ENSGALG00000004152	19.6001	19.6582	24.2748	21.8507	20.9405	33.9747
ENSGALG00000004153	3.48411	3.9435	4.111	3.83318	5.76708	4.04931
ENSGALG00000004156	14.9792	15.3232	17.3422	17.222	18.3301	22.2727
ENSGALG00000004160	55.8424	55.1151	55.5704	63.8577	65.5378	73.3744
ENSGALG00000004161	281.204	380.857	376.046	334.179	413.519	624.558
ENSGALG00000004162	5.2462	3.50653	2.96733	4.46163	4.06359	21.0945
ENSGALG00000004163	0	0	0.0720698	0.0296426	0.0698106	0.465852
ENSGALG00000004165	32.1694	30.8938	30.4155	30.986	33.8705	37.4945
ENSGALG00000004166	13.0112	14.5361	16.754	14.6358	15.2051	21.6587
ENSGALG00000004167	4.03971	2.8408	9.1569	6.11595	4.87596	8.34618
ENSGALG00000004168	18.0348	21.7193	19.5481	18.872	21.0739	26.9233
ENSGALG00000004169	35.0488	35.5157	31.0901	31.6899	35.9146	25.7953
ENSGALG00000004170	25.1497	31.5091	36.7666	18.9608	32.8097	28.0586
ENSGALG00000004171	9.30654	9.00254	8.81288	8.76201	8.01235	12.8083
ENSGALG00000004172	14.7496	14.5187	16.5771	15.7512	17.6244	22.175
ENSGALG00000004173	0.101229	0.0419979	0.133133	0.0597768	0.0572605	0.213954
ENSGALG00000004174	42.5529	43.7019	43.9831	41.6903	47.579	72.526
ENSGALG00000004176	97.1234	102.75	93.8092	102.929	86.3524	76.3366
ENSGALG00000004179	9.76055	10.2457	10.314	10.4749	11.7584	18.5163
ENSGALG00000004180	58.0416	54.4649	61.448	53.4017	52.2972	79.3244
ENSGALG00000004184	2942.1	2297.88	2058.82	3066.91	2439.21	1511.06
ENSGALG00000004186	12.1171	12.478	7.72694	7.49107	7.2853	9.14191
ENSGALG00000004189	8.67111	10.636	9.80197	9.05666	11.1103	10.3024
ENSGALG00000004190	13.6959	14.2076	13.0398	14.5223	14.091	18.8958
ENSGALG00000004191	7.3267	8.68846	9.86197	8.01488	8.62911	22.8018
ENSGALG00000004192	11.5598	11.1342	10.6294	10.6164	11.0106	6.99727
ENSGALG00000004193	4.03762	2.54926	4.8563	3.70833	3.54193	3.69208
ENSGALG00000004195	11.7931	13.6397	12.4579	16.4446	18.0004	22.9778
ENSGALG00000004196	0.0978057	0.208035	0.0404574	0.098115	0.078439	0.163574
ENSGALG00000004197	10.3839	10.4816	10.1526	11.8846	12.1898	17.3807
ENSGALG00000004198	52.1442	53.323	59.0771	62.0296	68.4196	89.759
ENSGALG00000004199	10.2889	16.1103	14.2719	13.2357	17.3966	33.3351
ENSGALG00000004200	14.0835	14.6227	15.535	13.741	15.6751	32.1157
ENSGALG00000004203	15.0826	16.4785	17.9674	20.0295	20.6003	19.455
ENSGALG00000004204	14.1135	15.3069	16.0371	13.5124	14.9915	13.917
ENSGALG00000004205	87.8547	77.7518	86.1876	75.3408	91.0693	106.356
ENSGALG00000004209	0.152854	0.114354	0.125939	0.0598866	0.157183	0.131717
ENSGALG00000004212	48.577	52.9569	46.9872	39.3708	39.9509	28.0237
ENSGALG00000004215	19.616	23.8122	20.961	22.2891	24.6739	28.2025
ENSGALG00000004216	17.6795	15.9127	18.6702	20.5937	22.4686	36.0432
ENSGALG00000004220	174.852	177.35	171.574	155.837	166.428	155.31
ENSGALG00000004221	1.50624	1.47015	1.65929	1.08437	1.249	2.05599
ENSGALG00000004222	36.9213	41.8795	39.6841	37.3087	40.3808	54.3895
ENSGALG00000004224	8.1286	9.66329	11.2322	10.8769	11.9361	23.6591
ENSGALG00000004225	17.2574	17.8498	18.2437	16.2274	19.9386	18.1245
ENSGALG00000004227	6.45603	6.53109	6.27382	6.86513	7.26564	5.95785
ENSGALG00000004228	6.93973	8.36086	5.90071	6.10454	6.57829	9.4438
ENSGALG00000004230	0.29114	0.353691	0.112324	0.0308517	0.0724668	0.0672707
ENSGALG00000004231	3.79086	3.94618	4.91743	2.31989	3.31445	2.00246
ENSGALG00000004234	2.81081	3.59555	3.90001	2.44523	4.18553	3.30934
ENSGALG00000004236	4.92979	5.76439	5.14419	5.91045	5.94961	8.13078
ENSGALG00000004237	75.2062	71.8394	69.6106	64.1534	70.0674	54.7288
ENSGALG00000004238	8.04237	10.1555	10.9088	12.1877	10.3662	16.3943
ENSGALG00000004239	1.57396	1.38105	1.72162	1.77718	2.11233	1.04056
ENSGALG00000004240	7.62298	7.72047	8.74157	9.25188	8.78563	10.5628
ENSGALG00000004243	9.89196	9.59198	17.1696	8.67484	8.04971	60.9713
ENSGALG00000004244	6.30399	6.36479	7.49184	6.24426	6.92108	6.75914
ENSGALG00000004245	23.5805	42.552	30.7194	56.947	32.2802	33.4496
ENSGALG00000004246	0.573	0.818815	0.730409	0.221594	0.820697	0.561881
ENSGALG00000004247	0.284577	0.174314	0.379287	0.220871	0.289491	0.251462
ENSGALG00000004249	1.06491	0.747466	1.10626	1.07862	1.05461	2.08607
ENSGALG00000004250	5.53141	7.3441	6.53116	7.63401	9.62836	11.2434
ENSGALG00000004252	1.27525	0.832016	1.08207	1.32806	0.88136	0.696111
ENSGALG00000004254	6.02606	6.50121	5.08088	6.91886	7.69389	15.0948
ENSGALG00000004255	9.19729	9.47634	13.2054	9.66536	10.8114	31.8928
ENSGALG00000004257	1.2416	1.22066	0.970841	1.44505	1.9849	2.80529
ENSGALG00000004259	32.3691	33.8964	34.9718	38.6468	38.0765	64.5236
ENSGALG00000004261	0.118666	0.0438925	0.0373568	0.0296772	0.0806271	0.0905666
ENSGALG00000004263	62.7151	63.0864	62.6567	71.7359	66.1716	56.4866
ENSGALG00000004266	12.3627	14.7722	13.1003	18.1908	17.0452	12.69
ENSGALG00000004267	0.229801	0.0986762	0.298367	0.022453	0.158961	0.0761273
ENSGALG00000004268	13.6257	15.5051	16.0801	13.9406	15.4204	27.1231
ENSGALG00000004270	15.6679	16.4772	17.5278	7.77049	14.7259	9.90066
ENSGALG00000004272	7.10945	10.4051	9.34546	10.2635	11.0655	12.9439
ENSGALG00000004273	35.302	44.0145	35.6737	38.8083	42.1557	60.5982
ENSGALG00000004274	2.62831	2.63909	4.4916	1.83219	2.88164	1.53299
ENSGALG00000004276	11.1822	11.7417	8.98207	15.9147	10.563	13.6221
ENSGALG00000004280	0.0278486	0.0268774	0.116434	0.215454	0	0.0536643
ENSGALG00000004282	14.9351	14.7782	15.4387	12.6588	13.0959	10.5392
ENSGALG00000004286	1.95136	2.12988	2.15172	1.50532	1.7229	1.29384
ENSGALG00000004288	5.63187	6.36422	4.35401	4.42807	4.678	3.07324
ENSGALG00000004290	0.721799	0.447659	0.868769	0.604418	0.563758	0.59607
ENSGALG00000004294	9.71204	9.40899	7.62939	3.66978	5.66531	5.99154
ENSGALG00000004295	33.7801	32.4205	34.927	32.5467	32.643	31.1457
ENSGALG00000004297	0.135019	0.106971	0.51702	0.114365	0.25346	2.14196
ENSGALG00000004300	13.5169	14.3246	15.1846	14.2245	17.0321	23.0448
ENSGALG00000004302	34.3592	37.9759	35.1702	37.8081	37.8939	40.3327
ENSGALG00000004304	79.2724	81.4864	99.3615	78.7669	90.7181	63.894
ENSGALG00000004306	5.38147	6.45459	8.0217	6.14926	9.67963	6.39154
ENSGALG00000004309	1.2382	2.12616	1.93167	1.15289	1.29216	1.45821
ENSGALG00000004310	27.1533	27.8629	20.6511	26.1026	25.6613	20.1298
ENSGALG00000004311	14.221	16.0362	13.6474	12.9764	10.3039	11.3565
ENSGALG00000004319	2.22048	1.88561	1.77178	1.33888	1.75057	1.29163
ENSGALG00000004320	0.190416	0.0978431	0.0642798	0.30789	0.227199	0.100582
ENSGALG00000004321	18.6252	20.5375	22.1654	19.9326	19.9015	42.5534
ENSGALG00000004322	0	0.0274619	0.196311	0.0124778	0.0734904	0.683292
ENSGALG00000004323	5.26508	6.19215	5.34409	3.9441	6.29918	7.33207
ENSGALG00000004324	2.67483	3.20373	3.15836	2.70635	2.63722	2.7364
ENSGALG00000004325	107.162	88.5764	73.4726	78.5118	81.2686	52.3677
ENSGALG00000004326	19.5839	21.9572	25.6748	21.8981	22.5219	31.2808
ENSGALG00000004328	5.4444	5.86261	6.51649	6.69014	7.03184	8.2115
ENSGALG00000004329	7.10621	6.01452	7.79881	6.14296	7.24205	6.04919
ENSGALG00000004332	0.529275	0.563846	0.0790386	0.159737	0.327052	0.377522
ENSGALG00000004333	17.9631	15.2856	14.4519	15.5709	13.9967	15.6363
ENSGALG00000004334	3.27454	4.16634	3.47798	2.47799	2.75821	2.60835
ENSGALG00000004336	0.0814086	0.111496	0.112245	0.051737	0.0487673	0.210554
ENSGALG00000004339	0.149472	0.174045	0.0559753	0.0273778	0.174156	0.0206086
ENSGALG00000004341	2.92569	3.08387	3.99843	6.28291	3.73748	2.74953
ENSGALG00000004342	19.2565	24.0087	14.8551	24.1464	25.5647	24.9112
ENSGALG00000004343	0.451192	0.331783	0.296247	0.744021	0.17732	0.602696
ENSGALG00000004345	2.62716	2.34354	3.71518	2.58009	1.69457	1.53755
ENSGALG00000004346	0.198398	0.0956001	0.214268	0.370502	0.126227	0.586681
ENSGALG00000004347	12.1033	11.3794	11.6823	10.2507	11.078	9.48282
ENSGALG00000004348	3.29467	3.32087	3.16085	3.77661	3.19956	4.90516
ENSGALG00000004350	2.3817	2.95802	2.88884	2.88577	2.30128	3.44656
ENSGALG00000004352	38.0225	42.6479	43.6069	49.7998	45.2954	65.9365
ENSGALG00000004353	22.5259	26.614	21.2913	24.0797	24.2035	19.9616
ENSGALG00000004355	13.106	17.5436	17.2777	12.1387	16.7318	23.7398
ENSGALG00000004357	101.577	108.159	126.081	106.322	116.888	98.4132
ENSGALG00000004362	15.2778	15.4562	16.7679	17.8266	17.4222	22.7942
ENSGALG00000004363	19.9288	18.6821	19.8312	20.8902	22.7092	28.3618
ENSGALG00000004364	4.90355	6.01726	6.19027	4.21856	5.78494	7.17615
ENSGALG00000004366	17.2392	19.5564	17.3936	19.5748	18.6216	17.778
ENSGALG00000004367	0.361455	0.273733	0.29426	0.519216	0.109172	0.45555
ENSGALG00000004369	5.26597	7.01139	5.76525	4.93995	6.18968	15.4001
ENSGALG00000004370	4.11815	4.02265	4.25196	4.07352	4.79915	5.83698
ENSGALG00000004372	14.7607	16.7761	19.6055	14.4525	17.7705	31.3269
ENSGALG00000004375	56.6135	54.9868	56.4863	47.1963	60.3792	84.0454
ENSGALG00000004376	2.17556	2.56562	2.95289	2.14077	1.94324	2.3487
ENSGALG00000004378	6.6068	6.9159	6.33474	5.83803	6.30466	8.90972
ENSGALG00000004379	0	0	0	0	1.11825	1.19412
ENSGALG00000004383	28.2005	29.8972	30.7502	29.6616	31.5888	47.7332
ENSGALG00000004386	0.371851	0.855988	1.31245	0.647865	0.835245	4.43138
ENSGALG00000004387	35.4482	36.6735	30.1247	27.6899	30.9194	33.4089
ENSGALG00000004390	17.419	18.9159	17.7118	15.2508	17.8806	16.7009
ENSGALG00000004394	1.24053	1.33621	1.29607	1.24688	0.924556	0.918108
ENSGALG00000004397	6.77396	7.19994	5.94733	4.86982	5.42762	9.62028
ENSGALG00000004398	1.01456	0.874582	0.792708	0.717923	0.828819	2.75539
ENSGALG00000004400	7.42701	10.7995	8.95056	8.65917	6.86737	19.9243
ENSGALG00000004401	0.155169	0.275717	1.89325	0.386303	0.482568	10.9442
ENSGALG00000004410	36.1209	34.8281	34.3151	38.4979	41.4531	43.3134
ENSGALG00000004412	18.1182	20.6746	18.7751	19.064	21.244	23.6673
ENSGALG00000004413	8.78309	7.30486	7.26768	8.11774	8.20462	8.9577
ENSGALG00000004416	5.45329	6.4416	5.78539	5.44392	5.51997	7.52743
ENSGALG00000004418	0.20137	0.0429778	0.0945677	0.214271	0.161662	0.152981
ENSGALG00000004420	2.75476	2.57967	3.11354	2.20453	1.87976	4.02193
ENSGALG00000004424	0.569918	1.60796	0.485668	0.878235	0.497522	1.47781
ENSGALG00000004425	13.398	14.2263	12.3061	12.4737	13.3453	15.0081
ENSGALG00000004428	0.649882	1.24579	1.50066	0.814005	0.36806	0.982247
ENSGALG00000004431	85.4242	87.8075	82.1945	104.764	94.3457	87.723
ENSGALG00000004435	23.2678	27.258	29.6634	24.8777	33.5725	44.8712
ENSGALG00000004436	4.65502	4.00018	10.2486	1.1897	6.30118	26.5954
ENSGALG00000004437	10.8956	10.1033	12.1944	11.1008	11.7755	6.40154
ENSGALG00000004438	4.06145	4.48531	4.48801	5.785	4.50206	4.08327
ENSGALG00000004440	19.8407	22.6114	24.9084	23.9518	22.7868	31.4383
ENSGALG00000004441	1.64108	1.97195	6.67774	1.31902	3.03804	28.9647
ENSGALG00000004442	42.6368	45.1904	43.3573	51.0002	49.1703	42.321
ENSGALG00000004444	10.3076	15.7039	15.5013	11.9918	14.475	27.7999
ENSGALG00000004446	0.17307	0.165616	0.0922462	0.0759438	0.0900536	0.337164
ENSGALG00000004448	0	0	0.167594	0.017411	0.143317	0.156648
ENSGALG00000004455	6.5397	6.59801	4.77991	5.1018	5.32004	5.10244
ENSGALG00000004460	5.90271	6.44685	8.05321	5.10679	7.27068	13.0242
ENSGALG00000004465	36.6621	44.062	43.1419	49.6733	49.1585	73.3609
ENSGALG00000004467	7.21521	6.54578	6.07328	5.50664	5.51414	4.83778
ENSGALG00000004469	9.25736	9.32045	9.71681	11.1806	10.9635	12.9675
ENSGALG00000004472	0.574822	0.595381	0.725954	0.681321	0.854973	1.5558
ENSGALG00000004474	24.669	23.7527	24.021	27.2058	22.0293	27.0047
ENSGALG00000004476	3.48094	2.58936	4.65679	5.74407	5.688	4.43231
ENSGALG00000004477	9.34978	10.2367	10.3181	8.1438	8.91682	10.7009
ENSGALG00000004480	25.1862	22.6981	29.4939	31.6472	23.5536	27.1956
ENSGALG00000004483	21.1126	24.0189	27.8371	25.3348	25.6523	31.8103
ENSGALG00000004486	13.116	12.5884	11.6153	11.7065	12.7838	7.93232
ENSGALG00000004489	2.35712	2.02835	5.54291	2.08729	3.60588	5.02069
ENSGALG00000004491	0.772952	0.928867	1.29017	0.449412	0.929978	0.350396
ENSGALG00000004492	3.2583	3.66314	2.61794	3.21942	4.13471	7.06814
ENSGALG00000004493	24.1629	24.8239	24.7705	28.0888	25.4647	21.5329
ENSGALG00000004494	8.90765	10.5886	10.4909	9.81332	11.1963	24.8708
ENSGALG00000004495	0.0958672	0.090026	0.102463	0.441246	0.380205	0.497978
ENSGALG00000004496	31.7564	42.7541	38.6222	36.2204	38.8238	63.0094
ENSGALG00000004498	3.91391	3.64322	4.11758	4.58259	4.0301	2.99185
ENSGALG00000004500	5.89954	6.39779	6.51646	7.00022	7.31868	16.3248
ENSGALG00000004503	4.23003	3.62451	4.9187	5.04311	4.26297	3.87585
ENSGALG00000004504	0.105794	0.0870026	0.147266	0.0270051	0.160356	0.140285
ENSGALG00000004505	1.65757	3.29074	1.76455	5.65579	4.39931	5.83035
ENSGALG00000004506	31.8937	38.3821	32.7445	34.8669	39.3129	30.9004
ENSGALG00000004508	0.100543	0.193059	0.138693	0.155067	0.25096	0.340634
ENSGALG00000004509	646.286	689.902	877.529	786.242	879.406	706.735
ENSGALG00000004514	0.632091	1.01463	1.43263	0.664178	0.567734	1.12896
ENSGALG00000004515	4.88652	5.78093	3.6987	5.98055	6.74302	4.67352
ENSGALG00000004517	3.74926	4.12478	5.08405	4.41498	3.90677	3.55391
ENSGALG00000004518	1.19454	0.995755	1.46742	0.911022	1.65715	1.72293
ENSGALG00000004519	5.1249	4.97228	5.91368	3.0464	4.02655	3.74039
ENSGALG00000004521	154.568	140.911	173.939	176.503	141.017	122.999
ENSGALG00000004523	13.3368	17.26	15.3434	13.0121	17.9579	23.3812
ENSGALG00000004525	1.72729	1.81688	2.3556	2.022	1.8212	12.5006
ENSGALG00000004528	19.751	16.785	15.4423	18.623	14.8459	7.69612
ENSGALG00000004529	40.5739	37.3411	37.0951	38.6097	37.1233	44.5567
ENSGALG00000004530	0.398252	1.28128	0.427279	0.11716	0.490105	0.533074
ENSGALG00000004531	31.0462	31.3918	36.427	34.7307	34.3068	21.168
ENSGALG00000004532	2.85178	3.09266	1.78061	2.05874	2.40005	1.06768
ENSGALG00000004533	21.8291	21.8987	19.4105	21.9061	24.6568	20.1637
ENSGALG00000004534	25.013	26.5896	25.0575	24.2974	29.9337	35.6269
ENSGALG00000004538	0.270509	0.316794	0.987971	0.33801	0.604889	5.57668
ENSGALG00000004542	11.0849	11.6086	8.02474	8.72342	9.75003	7.62854
ENSGALG00000004545	0.073295	0.212162	0.833819	0.111894	0.279177	3.57848
ENSGALG00000004550	14.1476	15.8432	16.0279	12.725	14.6411	26.7751
ENSGALG00000004553	22.1465	26.3497	28.2491	29.4761	33.278	54.3667
ENSGALG00000004554	23.4475	23.3405	26.8042	26.7897	25.6913	31.8871
ENSGALG00000004555	31.3636	32.0676	30.3944	32.3541	35.5512	43.1814
ENSGALG00000004557	22.691	26.8385	24.7112	26.3033	26.6711	51.3813
ENSGALG00000004559	5.92036	5.22752	4.05122	3.78119	4.90774	2.36897
ENSGALG00000004562	8.33496	9.16249	12.2441	8.60783	10.1145	48.8119
ENSGALG00000004569	6.19963	6.13619	7.67055	5.79674	6.12061	13.1741
ENSGALG00000004570	5.272	6.15375	3.89737	4.60958	5.37286	3.9127
ENSGALG00000004571	41.5752	42.6065	46.2647	44.1527	50.4908	60.9389
ENSGALG00000004573	9.70677	10.5994	12.1447	7.96366	11.1976	46.6297
ENSGALG00000004574	0.614291	0.400505	0.779256	0.295899	0	0.78566
ENSGALG00000004578	7.58783	7.78632	7.75409	6.10799	7.76934	15.3617
ENSGALG00000004581	15.5276	13.9888	11.134	15.6975	18.2871	16.2039
ENSGALG00000004582	4.77111	5.45843	7.43432	9.90855	5.6797	5.4911
ENSGALG00000004583	29.2366	31.9149	33.628	32.1495	36.3935	40.7351
ENSGALG00000004587	6.42793	8.15701	4.56186	4.96109	5.32293	3.79643
ENSGALG00000004588	266.944	256.977	255.426	236.932	235.531	172.38
ENSGALG00000004590	10.4867	8.92511	10.5124	7.97793	10.0872	15.1664
[truncated: 14,792 more rows]

## Sheet: All genes identified in SYF
ENSEMBL	SYF-1	SYF-2	SYF-3	SYF-4	SYF-5	SYF-6
ENSGALG00000000003	0.587718	0.857804	0.540255	1.12682	0.373316	0.863218
ENSGALG00000000011	11.682	9.51873	12.6721	8.97376	10.8511	10.934
ENSGALG00000000038	0.153697	0.152337	0	0.28706	0.170986	0
ENSGALG00000000044	0.486327	1.02631	0.4548	2.04534	0.793733	1.20589
ENSGALG00000000048	0.914566	0.769932	1.04186	1.33701	0.905299	1.53356
ENSGALG00000000055	69.6794	52.0469	68.0996	45.7617	68.772	82.6504
ENSGALG00000000059	1.84736	1.82654	10.6295	2.63386	6.29899	18.7789
ENSGALG00000000067	12.7046	12.3662	7.81274	12.4909	8.56653	8.6141
ENSGALG00000000071	2.51385	1.19607	2.70059	2.09583	3.43276	3.33316
ENSGALG00000000081	0.0206803	0	0.106247	0.0566151	1.08924	0.1846
ENSGALG00000000086	33.6009	28.765	34.5594	29.9805	31.118	35.1064
ENSGALG00000000091	13.0607	13.2274	20.2601	12.2738	16.1631	20.9743
ENSGALG00000000094	36.5978	33.5951	36.107	30.5182	33.8248	38.0514
ENSGALG00000000102	21.5798	22.0632	21.2151	16.2311	18.712	23.6824
ENSGALG00000000104	1.33492	1.36288	1.09757	2.66834	1.38983	1.62903
ENSGALG00000000106	8.51873	8.47277	8.65208	8.05053	7.50326	9.94736
ENSGALG00000000107	0.24741	0.0441267	0.137654	0.247537	0.0737355	0.199975
ENSGALG00000000109	3.11653	3.64751	3.11625	5.66842	2.76918	3.72385
ENSGALG00000000112	0.243556	0.0403439	0.376008	0.537381	0.514925	0.248109
ENSGALG00000000115	0.170601	0	0.617243	0.0772574	0.84315	2.27576
ENSGALG00000000122	212.143	226.245	204.47	220.394	223.347	232.715
ENSGALG00000000129	22.5193	20.0026	26.9847	21.2254	24.5106	26.4468
ENSGALG00000000137	61.5936	55.9136	43.1444	50.8185	43.3598	50.7473
ENSGALG00000000141	26.2462	18.0958	16.915	36.4575	37.4966	30.3784
ENSGALG00000000142	30.0669	29.0913	41.3774	29.4461	35.5902	51.2724
ENSGALG00000000146	8.85699	10.0601	9.79983	8.48459	9.57835	9.70149
ENSGALG00000000150	246.328	222.167	237.098	230.259	258.064	292.453
ENSGALG00000000151	3.85294	4.28611	2.76689	4.5696	2.44485	5.7086
ENSGALG00000000154	5.73066	5.21041	8.43557	4.68294	10.6485	9.47819
ENSGALG00000000156	48.3521	55.3618	47.4472	56.7498	39.4097	38.8068
ENSGALG00000000158	10.5248	12.9659	7.54518	17.7605	17.9316	15.1484
ENSGALG00000000161	7.52455	6.38238	7.69073	8.14289	7.97886	9.9493
ENSGALG00000000162	0.156096	0.0401711	0.185885	0.139184	0.0411836	0.0881748
ENSGALG00000000164	0.0164948	0	0.432049	0.0601725	0.252416	0.55118
ENSGALG00000000168	6.26537	11.1061	3.99093	6.35368	4.18963	2.51948
ENSGALG00000000184	5.69298	7.42742	8.90427	13.8731	6.5401	5.81441
ENSGALG00000000186	4.99033	5.07268	7.25712	5.06873	7.62426	8.88094
ENSGALG00000000189	6.9712	6.18242	10.4991	4.23444	8.77942	7.81539
ENSGALG00000000195	5.53778	5.298	5.31997	4.22541	5.81371	4.86654
ENSGALG00000000201	7.71171	7.03462	8.80982	9.40219	9.05139	8.92736
ENSGALG00000000208	10.2586	7.3822	14.3935	7.66873	12.9685	10.2683
ENSGALG00000000209	18.9556	21.4025	21.1269	34.3789	34.7754	32.6378
ENSGALG00000000215	8.2797	6.47462	8.65935	3.49399	9.26078	6.90799
ENSGALG00000000217	0.372171	0.310935	0.430548	0.380883	0.502179	0.265091
ENSGALG00000000218	20.6134	18.3129	18.9183	17.9115	17.0114	19.7051
ENSGALG00000000220	8.57859	8.15597	6.89669	5.02212	5.60482	5.05233
ENSGALG00000000223	27.8514	29.3558	27.198	30.2804	27.2274	27.5521
ENSGALG00000000225	0.976315	1.41152	1.42651	2.37284	1.53205	2.50974
ENSGALG00000000226	2.57913	1.67269	2.0829	1.92341	4.3765	2.18538
ENSGALG00000000227	22.1821	27.1325	21.9366	25.1454	19.0229	24.75
ENSGALG00000000233	4.83677	4.89623	5.57446	6.13229	6.03253	4.98471
ENSGALG00000000234	1.00011	1.08833	1.67535	0.99519	1.87628	1.7249
ENSGALG00000000235	28.0035	28.0898	41.4921	26.2381	34.9202	50.1643
ENSGALG00000000241	7.13103	7.86916	4.17246	4.02542	4.40916	3.28364
ENSGALG00000000242	0.0538097	0.132867	2.66547	0.620019	1.25378	5.52579
ENSGALG00000000243	11.399	8.54908	10.7052	10.5446	12.959	11.4027
ENSGALG00000000244	1.8059	2.44607	2.45354	2.46625	2.16981	2.97477
ENSGALG00000000247	9.9397	9.9443	9.33532	8.72605	9.14755	10.597
ENSGALG00000000251	0.0655293	0.0484005	0.0500453	0.118894	0.57354	0.310615
ENSGALG00000000253	9.63557	7.27233	11.9585	8.79329	10.305	10.0972
ENSGALG00000000255	21.9443	22.4431	20.8482	13.2355	20.5693	12.5853
ENSGALG00000000259	22.984	18.9699	26.8923	25.0646	33.3289	25.6375
ENSGALG00000000264	9.30325	7.92067	13.4863	6.41672	13.2814	9.95632
ENSGALG00000000273	4.66242	5.5286	3.88689	3.65156	5.02293	3.5934
ENSGALG00000000275	7.91217	10.5071	15.8187	10.9829	14.402	15.6755
ENSGALG00000000276	7.0531	7.90505	7.21179	6.11891	7.83123	4.82417
ENSGALG00000000277	0.19318	0.232054	0.165212	0.374877	0.210662	0.479192
ENSGALG00000000280	1.24319	2.19748	3.53118	3.63657	5.83924	3.40343
ENSGALG00000000284	20.6899	29.6732	22.4952	23.1481	13.1485	14.5308
ENSGALG00000000293	0.0953643	0.0288753	0.112602	0.0864244	0.152555	0.106149
ENSGALG00000000295	0.0881549	0.0544717	0.203546	0.0698626	0.175483	0.230795
ENSGALG00000000296	10.6886	9.71576	11.7149	7.20557	12.1047	10.5728
ENSGALG00000000299	1.2818	1.15863	6.73476	2.83162	4.65239	10.6549
ENSGALG00000000302	0.0711342	0.0886676	0.279188	0.642347	0.0970342	0
ENSGALG00000000309	0.17856	0.110751	0.0986088	0.109703	0.114586	0.0902013
ENSGALG00000000311	8.09596	7.06509	7.43624	2.86468	5.37164	3.08302
ENSGALG00000000313	1.81414	1.30692	1.16032	3.1053	1.0553	0.344333
ENSGALG00000000314	20.0742	11.9351	42.43	18.0224	36.081	70.5294
ENSGALG00000000317	2.1971	0.953914	12.8277	3.47974	6.15595	22.1238
ENSGALG00000000318	150.127	256.619	106	227.946	117.617	140.943
ENSGALG00000000329	21.8889	21.9915	16.9485	22.742	18.3172	16.4672
ENSGALG00000000336	30.1906	33.9079	31.7374	28.1039	30.0417	37.0735
ENSGALG00000000337	0	0	0	2.50073	6.4923	0
ENSGALG00000000349	60.2045	58.0525	44.1527	64.8696	44.4691	44.4145
ENSGALG00000000352	9.73554	9.12211	10.1444	8.96424	9.52056	10.6573
ENSGALG00000000357	0.249949	0.346935	0.222844	0.554524	0.580338	0.490359
ENSGALG00000000364	3.64128	5.46029	4.75861	4.09509	11.2557	3.20091
ENSGALG00000000371	0.140637	0.0695338	1.19217	0.320849	0.541403	2.35161
ENSGALG00000000374	11.0901	11.9741	11.4812	13.6286	12.6265	13.598
ENSGALG00000000377	60.9535	61.6939	50.1106	58.9603	45.9675	45.4907
ENSGALG00000000378	5.75394	6.16453	5.38551	5.69153	3.18609	4.18008
ENSGALG00000000379	5.39975	5.73718	3.05996	4.88125	4.08369	5.89534
ENSGALG00000000390	9.30774	8.21788	12.0623	8.6563	11.0706	14.5528
ENSGALG00000000394	0.501717	0.363767	6.51123	0.617119	3.69835	8.34269
ENSGALG00000000396	10.574	9.39387	12.7012	10.455	14.0597	13.786
ENSGALG00000000397	19.5406	19.3357	21.5441	19.8333	17.7969	21.6883
ENSGALG00000000399	0.365873	0.441117	0.105565	0.621031	0.0761967	0.158634
ENSGALG00000000400	0.037027	0.183384	0.644141	0.109338	1.02708	0.901672
ENSGALG00000000401	3.25213	3.8284	3.91992	3.18105	3.67244	3.57746
ENSGALG00000000402	22.5603	30.0445	22.7612	18.0072	21.0857	19.4801
ENSGALG00000000404	25.5636	26.5322	32.8791	22.4629	26.3737	28.8502
ENSGALG00000000407	8.25602	7.66382	8.51572	8.42096	10.2657	9.65794
ENSGALG00000000409	50.8949	39.8752	68.7062	42.3685	64.0973	65.4796
ENSGALG00000000410	9.08996	9.71551	11.2939	9.56905	10.4135	15.3473
ENSGALG00000000417	2.82091	3.97352	2.61792	4.28384	3.01787	3.75847
ENSGALG00000000419	71.7522	59.3384	75.2487	65.5974	77.4804	73.2881
ENSGALG00000000424	67.8068	68.1295	52.8297	65.547	56.2096	66.5772
ENSGALG00000000430	7.04575	8.50965	6.67901	5.36876	6.67807	5.40259
ENSGALG00000000433	0.506079	0.516409	0.94286	0.639449	0.729321	1.38333
ENSGALG00000000436	17.5856	15.282	16.2027	18.3544	18.2007	19.7555
ENSGALG00000000438	7.90662	6.62111	11.3832	5.73667	9.23643	8.91218
ENSGALG00000000441	0.114831	0	0.119023	0.0828783	0.125728	0.281634
ENSGALG00000000442	3.06257	2.22219	6.07456	4.72028	5.27739	7.27456
ENSGALG00000000451	0.830586	0.638816	2.94105	0.397911	2.48606	4.23374
ENSGALG00000000452	6.84927	6.6767	3.80644	5.54132	2.72038	3.73972
ENSGALG00000000458	0.562986	0.235642	0.87659	0.640193	0.958465	0.205189
ENSGALG00000000461	36.7994	72.0732	41.8752	47.336	44.6632	43.3515
ENSGALG00000000466	0.327879	0.22623	0.463253	0.434235	0.411416	0.345795
ENSGALG00000000470	48.8235	55.9513	39.5414	31.5355	28.6265	26.2299
ENSGALG00000000474	481.228	386.246	337.871	399.985	414.836	506.624
ENSGALG00000000476	0.064764	0.139497	0.340728	0.270609	0.471785	0.580551
ENSGALG00000000478	2.04975	1.93572	3.2966	2.38198	2.32587	2.68061
ENSGALG00000000497	1.83296	0.271986	3.72518	0.971515	2.75155	2.18704
ENSGALG00000000498	2.06635	1.79452	2.82746	2.13263	3.88513	4.74113
ENSGALG00000000504	0.829725	0.412135	0.594371	0.226657	1.26741	1.24106
ENSGALG00000000505	0.0791965	0.155115	0.134243	0.119571	0.0388633	0.345452
ENSGALG00000000507	0.0720935	0.117859	0.169971	0.0441054	0.157704	0.212568
ENSGALG00000000510	9.42158	9.21586	12.3985	8.02004	10.2432	11.8387
ENSGALG00000000511	15.2145	13.9652	28.6958	15.5453	21.9968	30.1048
ENSGALG00000000513	6.91633	6.12259	9.49082	6.95812	8.57987	7.32306
ENSGALG00000000516	1.48467	1.56732	2.311	1.45426	2.1312	2.50601
ENSGALG00000000518	11.9902	9.75246	12.7028	12.514	12.918	12.1008
ENSGALG00000000521	0.437374	0.2407	0.0951374	0.159835	0.187968	0.505381
ENSGALG00000000523	10.1794	9.86839	14.8193	10.2276	12.4041	15.4226
ENSGALG00000000525	10.1277	12.858	13.6289	10.7171	14.1426	16.01
ENSGALG00000000528	6.97874	5.36004	10.2965	6.14278	9.42699	10.2575
ENSGALG00000000529	24.0379	26.476	19.795	27.6458	23.0986	28.6875
ENSGALG00000000533	151.709	141.672	111.073	148.11	103.104	108.819
ENSGALG00000000535	10.3414	10.2076	12.8983	9.04925	13.6538	13.4615
ENSGALG00000000538	6.95404	7.99321	9.40813	8.73947	8.20068	11.094
ENSGALG00000000540	3.84726	3.18389	3.51681	3.2677	3.98626	4.4305
ENSGALG00000000541	17.8263	18.2031	24.3172	23.4202	22.4295	26.5995
ENSGALG00000000542	108.556	86.9418	129.686	101.388	136.775	130.431
ENSGALG00000000544	0.111195	0.0533245	0.368034	0.101862	0.171394	0.70942
ENSGALG00000000545	0.114886	0.0379269	1.89709	1.10549	1.59264	4.2586
ENSGALG00000000549	0.125972	0.127594	0.260827	0.347854	0.139299	0.140124
ENSGALG00000000550	18.3384	19.3699	20.6051	18.7363	18.8583	19.9893
ENSGALG00000000551	15.0998	12.665	18.7409	12.1819	15.3481	21.9422
ENSGALG00000000556	0.128335	0	0.139837	0.111766	0.703883	0.290284
ENSGALG00000000557	0.985691	1.23713	0.764455	0.849367	1.25687	0.942144
ENSGALG00000000558	17.7712	11.5162	7.45359	13.156	11.2239	8.44726
ENSGALG00000000560	0.201132	0.178102	0.18818	0.22467	0.206237	0.204018
ENSGALG00000000564	14.8747	15.5314	14.6783	16.1703	12.5038	12.7835
ENSGALG00000000573	1.49012	1.61338	2.08624	1.10592	1.28792	1.15296
ENSGALG00000000576	2.54521	2.11336	2.36393	1.78654	2.99324	2.66947
ENSGALG00000000577	17.7753	17.5477	23.6431	20.5443	17.4913	27.487
ENSGALG00000000579	116.632	104.296	135.744	119.84	131.436	142.192
ENSGALG00000000581	18.4218	17.2151	21.8021	21.3634	20.6589	21.7221
ENSGALG00000000583	0.80432	0.74583	0.797251	1.20289	0.881788	0.805134
ENSGALG00000000584	1.68434	2.50401	1.60161	3.31281	1.23755	2.00838
ENSGALG00000000585	11.6902	10.7164	7.57646	11.5014	2.96498	5.80349
ENSGALG00000000589	1.62973	1.00431	0.377466	0.901726	1.6108	1.22149
ENSGALG00000000596	21.3942	21.7967	36.7882	22.9588	29.8365	48.3074
ENSGALG00000000599	11.0516	14.3921	15.1683	10.7095	17.1948	16.7962
ENSGALG00000000603	11.6533	10.9625	12.8011	12.5779	12.3643	14.2303
ENSGALG00000000604	1.54281	1.95986	1.25002	1.96739	1.66172	1.8276
ENSGALG00000000606	20.2867	19.3736	13.9177	19.192	16.8449	16.4191
ENSGALG00000000607	0.907249	0.817203	1.23643	1.4554	1.24819	2.81316
ENSGALG00000000608	0.148503	0.267245	1.01595	1.71411	0.870821	1.15227
ENSGALG00000000611	16.4314	17.4539	18.9037	14.6382	15.8826	19.2232
ENSGALG00000000613	80.9067	82.614	127.708	80.472	117.321	131.957
ENSGALG00000000615	23.1676	19.9497	19.7969	22.9394	23.7151	24.3212
ENSGALG00000000616	3.61132	2.83039	6.45362	5.24541	6.27697	8.79919
ENSGALG00000000618	12.1072	9.81289	19.7157	13.0483	15.622	19.8539
ENSGALG00000000619	5.80103	6.16753	18.899	6.03022	12.7138	9.95534
ENSGALG00000000621	23.4498	35.8015	24.9782	36.9762	23.4293	26.4358
ENSGALG00000000625	6.31698	7.41478	8.0458	8.45464	6.73153	6.2633
ENSGALG00000000627	22.7968	18.6132	32.1849	25.6254	22.9324	47.1969
ENSGALG00000000629	83.8306	71.5719	72.6396	75.4484	75.3179	79.046
ENSGALG00000000632	19.9215	16.6213	21.6829	16.4465	26.2215	21.9747
ENSGALG00000000636	17.7516	18.2666	29.6001	14.8765	23.18	26.7851
ENSGALG00000000637	5.90918	4.51687	6.21401	5.36676	6.62817	7.87668
ENSGALG00000000638	17.1909	15.7812	20.0367	16.0816	18.5416	15.5043
ENSGALG00000000639	0.173899	0.191769	0.199076	0.0397558	0.215923	0.290632
ENSGALG00000000643	3.59951	4.29378	3.7228	4.03569	3.63552	3.25307
ENSGALG00000000645	0	0.128932	0.352448	0.121817	0.04844	0.0484743
ENSGALG00000000650	57.4287	43.4928	47.8854	46.9394	54.9447	45.686
ENSGALG00000000652	15.0384	19.9678	14.0151	20.9866	11.9408	11.6723
ENSGALG00000000654	0	0.12309	0.576335	0.280993	0.544491	0.553573
ENSGALG00000000657	21.8311	19.1772	28.4358	21.3739	27.0621	30.3858
ENSGALG00000000660	68.0857	58.4628	64.51	56.2286	68.7269	75.926
ENSGALG00000000667	3.02644	2.57569	16.4972	4.72994	33.1919	18.4979
ENSGALG00000000668	19.1241	17.7633	26.1748	20.8789	23.9867	24.5199
ENSGALG00000000669	20.0384	20.4273	22.2452	17.6678	16.6224	20.852
ENSGALG00000000672	6.52642	7.88449	8.90913	6.81074	8.21623	7.2748
ENSGALG00000000674	6.95241	8.8498	6.15765	8.09447	8.33066	7.57501
ENSGALG00000000678	55.4558	58.2047	89.9011	45.6119	62.9664	85.5919
ENSGALG00000000681	16.2853	10.2669	12.1589	12.4179	9.5915	13.8525
ENSGALG00000000684	4.74807	8.28811	6.00722	4.72158	5.20015	11.4678
ENSGALG00000000685	5.52698	5.92746	4.51301	7.47843	5.8674	5.54024
ENSGALG00000000690	0.501391	0.486565	0.185383	1.94606	0.338902	0.230784
ENSGALG00000000692	4.27198	3.62679	4.43015	3.12034	3.04355	4.24001
ENSGALG00000000693	21.5774	21.0442	20.4304	23.0621	21.6327	21.1706
ENSGALG00000000695	1.58634	2.5873	1.92511	2.62558	1.55993	1.74135
ENSGALG00000000699	11.1664	10.8971	17.9391	11.1958	13.5932	18.7994
ENSGALG00000000703	5.01221	9.23754	10.451	6.17936	9.61229	8.02302
ENSGALG00000000707	67.744	76.1382	54.2243	74.1352	55.5931	56.8367
ENSGALG00000000708	41.0894	46.8509	41.6761	37.0521	38.4246	39.4734
ENSGALG00000000712	10.2381	10.4512	16.093	11.9664	13.1429	18.7521
ENSGALG00000000713	3.7795	4.36701	3.3272	3.85008	3.30702	2.93185
ENSGALG00000000719	270.541	261.346	211.69	327.672	239.392	267.509
ENSGALG00000000720	4.84081	4.64073	5.21387	7.68738	8.67254	5.14048
ENSGALG00000000721	5.76382	6.80441	10.7509	6.53456	9.09722	12.7224
ENSGALG00000000723	32.226	34.1985	49.7779	34.1359	38.5011	49.0026
ENSGALG00000000724	15.0209	13.166	25.0834	15.9781	26.9365	23.6032
ENSGALG00000000726	69.575	70.5582	54.042	67.969	52.2435	51.7397
ENSGALG00000000729	8.78148	10.6271	7.34188	10.7284	6.42602	8.27957
ENSGALG00000000731	0.664995	0.449268	0.508235	1.19579	1.16169	0.644023
ENSGALG00000000734	32.6667	29.6471	35.3873	32.2544	35.5348	37.694
ENSGALG00000000736	0.886847	0.311926	0.367012	0.82056	0.70809	1.38664
ENSGALG00000000737	6.51699	3.56319	5.93443	6.98371	6.05661	4.88791
ENSGALG00000000740	6.79684	6.00817	7.288	6.52143	6.86852	7.71723
ENSGALG00000000747	1.79274	1.93394	1.82102	2.30998	2.13165	1.85372
ENSGALG00000000748	1.3025	1.29613	1.62771	1.61919	1.03421	1.47617
ENSGALG00000000751	25.8724	33.2557	34.9657	30.4723	36.313	35.683
ENSGALG00000000755	16.2421	16.8127	17.1468	8.97857	22.524	11.1914
ENSGALG00000000761	8.10025	9.30591	4.91979	5.43979	6.13377	6.37402
ENSGALG00000000764	158.374	156.405	132.704	183.159	137.082	119.646
ENSGALG00000000769	1.42966	1.73706	1.82099	2.01002	2.45264	1.58656
ENSGALG00000000775	30.3978	23.5389	31.6384	42.0536	92.9495	39.5384
ENSGALG00000000776	10.1996	9.37125	14.3948	10.4927	13.4044	13.4214
ENSGALG00000000777	15.594	13.2605	15.7291	14.6159	16.5577	14.6571
ENSGALG00000000783	1.51142	1.40761	1.57285	2.29065	2.62918	1.88914
ENSGALG00000000784	17.1913	19.3026	21.0603	17.8706	19.3882	20.6367
ENSGALG00000000785	14.7563	13.7651	11.3432	14.4243	13.1271	11.2231
ENSGALG00000000787	15.6168	15.2968	13.7819	15.3013	13.5178	13.7479
ENSGALG00000000788	0	0	0.369235	0	0.172328	0.0572349
ENSGALG00000000790	53.9955	46.3433	55.6585	53.1054	49.1519	59.6807
ENSGALG00000000791	12.0015	12.5482	11.8658	7.86049	11.5713	12.3236
ENSGALG00000000793	47.6193	51.4395	41.821	47.9799	42.381	49.5204
ENSGALG00000000795	31.065	31.4567	29.1061	40.8506	20.2002	19.6269
ENSGALG00000000802	13.2587	11.2143	9.59409	13.1558	10.41	11.1017
ENSGALG00000000803	7.49086	4.40222	49.2144	17.256	29.8477	90.8572
ENSGALG00000000811	43.2404	42.0974	44.5073	48.3595	38.5183	46.4486
ENSGALG00000000812	594.717	504.743	480.28	569.291	576.001	513.914
ENSGALG00000000814	56.3255	60.6149	48.5008	56.8488	45.3881	49.6181
ENSGALG00000000816	3.16818	3.15003	4.76639	4.3666	4.92399	5.85261
ENSGALG00000000817	13.701	15.7589	14.6906	24.4572	16.5553	19.635
ENSGALG00000000818	13.3071	12.896	10.8621	13.4366	10.545	9.91658
ENSGALG00000000820	0.912082	0.975967	1.07189	1.37958	0.870511	1.32502
ENSGALG00000000824	1.65134	1.19502	18.9285	5.27769	8.98399	29.4755
ENSGALG00000000830	0.424905	0.701705	0.520276	0.312377	0.927995	0.555513
ENSGALG00000000835	28.7398	28.5779	41.9076	27.3078	39.8877	48.5841
ENSGALG00000000836	0.572265	0.355805	0.878412	0.597287	0.39572	0.558276
ENSGALG00000000838	3.30104	3.69001	4.75226	3.57545	3.58092	5.08627
ENSGALG00000000839	0.126536	0.126762	0.0445427	0.148972	0.022979	0.16534
ENSGALG00000000843	5.79931	5.74566	6.11011	4.83394	5.72269	4.75486
ENSGALG00000000845	6.74336	5.80533	11.8833	6.15861	10.4344	15.6338
ENSGALG00000000847	16.9528	15.5489	16.6727	15.4755	14.0157	15.0638
ENSGALG00000000848	29.3566	29.998	42.8904	28.3899	35.1843	48.7318
ENSGALG00000000853	8.46587	8.06087	6.59101	10.1064	7.01774	7.82705
ENSGALG00000000855	27.1256	25.7512	27.9095	26.5398	24.2273	26.6113
ENSGALG00000000856	11.8918	11.959	13.2126	11.6068	11.9091	13.1524
ENSGALG00000000857	19.8699	19.5713	21.77	21.5448	19.7961	19.7707
ENSGALG00000000862	5.5376	4.50678	9.3527	5.21456	6.7924	10.1581
ENSGALG00000000863	2.61516	3.76639	5.00594	2.7832	4.55766	4.25579
ENSGALG00000000864	13.1668	12.775	12.7784	13.3697	11.2378	10.8315
ENSGALG00000000866	13.5643	21.6198	24.9662	32.4316	23.3083	18.818
ENSGALG00000000868	19.4369	19.6715	15.7694	21.9594	15.6015	14.7467
ENSGALG00000000870	1.66924	0.633286	1.81299	0.796098	2.11989	1.49853
ENSGALG00000000875	8.35327	8.51009	10.4551	5.97101	9.71004	8.77657
ENSGALG00000000881	4.42311	3.58481	6.00405	4.01382	6.09044	7.40432
ENSGALG00000000883	48.7665	42.7764	42.2801	42.7857	46.0248	33.999
ENSGALG00000000884	18.385	20.1698	16.0382	19.5375	12.8064	17.8589
ENSGALG00000000887	0.599558	0.311821	0.23475	0.23598	0.195925	0.300291
ENSGALG00000000891	9.07707	8.52605	11.1645	10.8067	9.98091	12.8419
ENSGALG00000000893	0.328777	0.0781775	3.7582	0.976726	2.39118	6.8828
ENSGALG00000000895	69.7707	63.236	76.021	66.158	70.132	77.6813
ENSGALG00000000901	0.0864943	0.303116	3.60174	0.305797	0.945637	5.50717
ENSGALG00000000902	2.70287	2.66662	7.92054	2.95514	6.23803	10.1469
ENSGALG00000000903	29.7145	26.0692	25.0437	26.6931	25.062	25.4988
ENSGALG00000000905	192.735	203.639	173.074	218.578	158.772	156.64
ENSGALG00000000906	2.48081	1.76989	3.75524	2.44703	4.19735	4.35495
ENSGALG00000000907	74.0365	76.2121	71.6449	66.1738	65.8465	69.6667
ENSGALG00000000908	8.86639	9.36926	10.1438	10.6655	9.87722	8.88411
ENSGALG00000000909	0.404064	0.337023	0.0788035	0.299543	0.271204	0.32604
ENSGALG00000000911	0.0566489	0	0.15	0	0	0.286948
ENSGALG00000000913	17.1786	16.0226	14.6713	18.3409	13.2133	16.9626
ENSGALG00000000918	0.883218	0.724608	0.271727	0.646523	0.793409	0.858423
ENSGALG00000000920	0.919775	0.638987	2.00073	0.73868	1.57502	2.29829
ENSGALG00000000927	21.0882	18.6001	13.458	12.9122	14.3835	19.2241
ENSGALG00000000934	5.39949	4.87567	6.00469	4.28317	6.31184	6.42027
ENSGALG00000000943	17.7905	20.6202	26.7555	18.7418	26.9557	28.9222
ENSGALG00000000944	77.3757	61.6362	48.5296	68.7194	72.5536	58.6073
ENSGALG00000000946	106.968	103.836	82.4468	102.505	89.1904	95.0166
ENSGALG00000000949	2.91203	3.28897	9.23383	4.63271	7.91744	9.44191
ENSGALG00000000950	24.5767	23.1102	19.3337	25.6408	15.8985	18.8559
ENSGALG00000000955	26.7375	25.3246	33.8058	22.5323	28.9903	31.7125
ENSGALG00000000962	6.60494	5.35792	7.80789	5.98434	7.32745	7.42998
ENSGALG00000000966	2.65051	2.93609	3.15789	3.43116	2.61713	3.9819
ENSGALG00000000972	15.4436	17.8773	13.9338	17.6686	10.4623	13.0133
ENSGALG00000000975	15.2472	10.5386	14.9224	14.1917	14.8659	17.8225
ENSGALG00000000977	11.1545	8.8236	8.81456	10.9048	9.24669	9.35717
ENSGALG00000000978	6.00925	7.81461	6.99193	7.41591	5.86894	6.65788
ENSGALG00000000988	34.0599	26.0166	36.8882	26.5103	35.281	33.0637
ENSGALG00000000990	167.949	172.39	133.353	218.065	137.601	143.923
ENSGALG00000000991	35.369	31.562	35.0094	35.344	36.9544	37.5097
ENSGALG00000000993	13.7687	14.1186	24.3154	14.1272	19.1489	21.4532
ENSGALG00000000994	0	1.23282	0.113781	0.306867	0.853267	0.856158
ENSGALG00000000996	17.7784	21.5058	25.8017	17.7224	20.095	25.9362
ENSGALG00000000997	8.99753	10.5832	8.26432	9.63198	8.16364	10.9327
ENSGALG00000000998	18.4385	17.9382	24.5638	19.8289	26.9216	27.697
ENSGALG00000000999	13.5054	13.0209	12.781	11.0922	12.0258	11.8029
ENSGALG00000001000	407.67	513.783	605.959	515.078	228.223	244.99
ENSGALG00000001003	32.1708	39.0115	29.2452	31.6799	31.5741	29.311
ENSGALG00000001006	2.17149	1.8049	5.11249	1.77337	4.12894	5.37554
ENSGALG00000001013	20.5211	19.816	18.1494	17.9631	22.3992	21.2373
ENSGALG00000001014	10.4396	9.45682	13.3954	10.0471	13.8461	12.7935
ENSGALG00000001017	7.01666	6.57819	15.8004	10.0655	16.0057	29.286
ENSGALG00000001019	16.5561	17.8601	24.2366	16.9039	22.3024	27.8984
ENSGALG00000001021	4.69925	6.54326	6.48886	7.28236	6.47559	7.01628
ENSGALG00000001022	11.399	9.95461	13.7613	11.2695	12.1536	15.7502
ENSGALG00000001024	84.9174	72.9878	96.5103	99.1373	114.174	125.943
ENSGALG00000001025	10.1405	9.86371	6.4752	7.73827	6.16877	4.75214
ENSGALG00000001028	0.552699	0.599721	1.32735	0.690941	0.682324	0.806801
ENSGALG00000001030	63.6074	65.6513	51.1296	51.1342	55.6631	48.8474
ENSGALG00000001031	0.0785582	0.126069	0.134713	0.0552775	0.171828	0.264885
ENSGALG00000001034	27.8916	24.9661	23.4832	24.8502	22.0306	23.6244
ENSGALG00000001035	0.191661	0.113179	0	0.210623	0.211066	0.936304
ENSGALG00000001036	8.77189	9.5954	9.95363	10.2827	9.29596	11.1728
ENSGALG00000001037	3.70468	4.20647	6.09978	3.65119	5.51058	6.34773
ENSGALG00000001038	13.1457	16.9765	12.5291	17.3647	17.9049	18.1061
ENSGALG00000001042	13.821	16.0369	17.4944	14.1053	11.6815	13.9277
ENSGALG00000001043	7.91868	7.98002	13.5116	9.61249	10.2461	14.3522
ENSGALG00000001046	27.7723	28.6884	33.6125	29.7724	29.3158	38.4666
ENSGALG00000001048	15.4487	20.1953	14.037	20.983	18.6607	15.3505
ENSGALG00000001049	8.29387	8.15389	8.02595	9.63441	7.93262	7.33266
ENSGALG00000001051	31.9495	34.7477	25.2643	35.3031	23.2934	28.6386
ENSGALG00000001054	38.3701	36.4202	32.1057	34.9374	33.116	34.9098
ENSGALG00000001055	18.3474	18.2362	21.6588	15.7897	18.7821	20.8414
ENSGALG00000001056	2.86925	2.12977	6.48194	2.59703	5.72429	3.79433
ENSGALG00000001058	2.37873	1.57282	3.13332	2.3351	3.57156	2.66979
ENSGALG00000001062	0.433528	0.438454	1.50566	1.2621	1.25001	1.48946
ENSGALG00000001067	12.7051	13.3269	10.6717	14.1195	10.311	13.5855
ENSGALG00000001073	1.9703	1.63846	2.32232	1.51923	2.20815	2.49835
ENSGALG00000001076	5.61515	5.79419	9.68329	6.82164	7.43762	9.04684
ENSGALG00000001080	93.6406	67.0887	40.3735	54.6595	37.4024	26.9896
ENSGALG00000001084	0.798872	0.63152	1.25954	1.20389	0.252224	0.358926
ENSGALG00000001091	0.451826	0.296691	0.34816	0.748547	1.44075	0.589874
ENSGALG00000001093	20.1003	24.2493	20.0708	23.4349	17.6897	16.9269
ENSGALG00000001094	0.53583	0.462798	0.510695	0.293047	0.372506	0.474733
ENSGALG00000001096	90.913	73.0499	66.8293	90.0947	74.2718	71.2982
ENSGALG00000001099	8.33515	9.30682	14.6302	7.87788	10.7809	12.9672
ENSGALG00000001101	18.8104	22.1095	23.5649	25.2817	22.6133	19.0408
ENSGALG00000001103	87.9117	79.9897	71.023	85.5504	64.2096	74.1738
ENSGALG00000001107	18.5024	18.9312	19.1681	21.0481	16.6093	16.8404
ENSGALG00000001108	4.13494	4.63131	4.73388	4.87976	5.39204	4.84852
ENSGALG00000001109	11.4443	17.2602	26.5585	2.5184	8.17397	19.1015
ENSGALG00000001110	6.43519	6.65982	8.47368	6.80777	7.15882	8.59255
ENSGALG00000001111	0.04532	0.0564041	0.247066	0.182989	0.0371254	0.214501
ENSGALG00000001115	10.7189	3.57923	7.3447	9.99575	6.98867	8.60007
ENSGALG00000001117	4.90528	4.81649	3.92224	6.09595	4.01433	4.2196
ENSGALG00000001118	67.6811	65.4199	42.4084	68.3532	41.4594	37.2154
ENSGALG00000001121	22.7266	25.7912	22.2576	26.0927	21.4191	25.3315
ENSGALG00000001122	0.680671	0.185355	0	0.0329001	0	0.0401548
ENSGALG00000001124	0.215867	0.153407	0.353552	0	0.101206	0.0689098
ENSGALG00000001126	6.25822	6.0262	12.1363	6.54456	8.10426	14.2464
ENSGALG00000001130	4.41347	4.20885	14.1704	4.04569	10.6801	10.6189
ENSGALG00000001136	0.999405	0.559885	0.78151	0.988976	0.754595	0.735082
ENSGALG00000001141	0.225588	0.254914	0.134916	0.342478	0.0706295	0.108754
ENSGALG00000001143	10.4622	14.6724	12.0376	15.5154	12.9771	13.7801
ENSGALG00000001144	3.66491	3.53366	4.35642	3.72379	3.4334	4.66373
ENSGALG00000001146	10.0968	8.77554	13.5018	7.6754	11.8314	14.8684
ENSGALG00000001149	0.191158	0.221524	0.0704241	0.160597	0.171578	0.210804
ENSGALG00000001153	3.28096	2.3522	3.20792	3.52579	3.09254	3.31082
ENSGALG00000001157	11.1138	12.3006	12.2578	11.8497	11.7853	12.4169
ENSGALG00000001158	4.71872	4.82045	5.92752	4.73777	6.36984	5.6634
ENSGALG00000001161	6.53277	8.86603	6.29433	8.98514	8.73744	8.10759
ENSGALG00000001163	15.9361	15.4246	18.4107	16.6994	17.7398	21.5323
ENSGALG00000001165	4.86143	4.6341	5.24841	4.66567	4.42051	5.18517
ENSGALG00000001168	28.6532	24.8612	26.6397	31.7183	31.9352	32.2004
ENSGALG00000001169	12.2312	13.8969	13.4779	12.3243	12.8976	9.36758
ENSGALG00000001171	1.48119	0.848833	2.18383	1.06124	1.9389	4.41471
ENSGALG00000001172	0.0659447	0.26137	0.087458	0.200338	0.106601	0.248768
ENSGALG00000001174	6.47924	6.71463	11.2277	6.3165	8.01824	12.1656
ENSGALG00000001175	57.4258	39.4456	53.8487	40.9426	50.43	39.8962
ENSGALG00000001177	25.0205	22.3961	27.167	21.1442	31.6391	34.4119
ENSGALG00000001181	2.0548	2.34234	1.26444	1.84747	1.87708	1.52041
ENSGALG00000001182	7.88065	8.76948	9.40675	6.75647	8.8584	7.57028
ENSGALG00000001183	58.6067	105.087	60.7078	67.2136	53.4582	64.8682
ENSGALG00000001184	44.5405	33.1302	33.209	41.1099	36.6596	37.3128
ENSGALG00000001189	0.816809	0.668008	0.798864	1.38825	1.72718	1.19757
ENSGALG00000001191	0.381938	0.0538677	0.074796	0.345183	0.0594784	0.0405848
ENSGALG00000001201	25.7273	22.6359	23.8258	18.0829	23.7513	26.2655
ENSGALG00000001203	0.291285	0.0727956	0.451815	0.130155	0.079756	0.161615
ENSGALG00000001204	7.21751	5.70377	6.70784	5.19479	8.36226	9.40325
ENSGALG00000001206	1.25057	0.571334	9.59761	1.54408	1.65147	11.5279
ENSGALG00000001207	0.951204	1.13432	0.838712	0.922834	0.638225	0.470289
ENSGALG00000001209	0.368608	0.741156	0	0.164027	0.120745	0.412889
ENSGALG00000001214	0.53161	0.436539	0.285328	0.538419	0.270961	0.452663
ENSGALG00000001219	12.6802	15.0039	12.7608	13.6515	12.0408	12.8018
ENSGALG00000001220	34.9007	42.265	38.5444	35.4365	18.3529	19.1081
ENSGALG00000001223	15.4141	14.1869	16.3251	16.6124	18.8364	18.8924
ENSGALG00000001225	17.2285	15.3493	17.2124	14.3903	15.4998	15.3296
ENSGALG00000001229	9.17299	11.9679	10.4896	7.03223	9.44056	8.43915
ENSGALG00000001231	10.6848	9.86446	8.89869	10.0644	10.9115	9.01935
ENSGALG00000001235	0.0351069	0.0797789	0.270716	0.141663	0.203632	0.58002
ENSGALG00000001238	19.9325	16.4008	18.6525	19.138	24.0021	24.6425
ENSGALG00000001239	1.95932	1.6759	4.53962	1.47319	3.13827	2.5595
ENSGALG00000001244	1.15669	0.158082	1.57885	0.729157	4.18352	3.8792
ENSGALG00000001245	13.2579	9.79299	13.7097	11.5911	14.9851	15.8063
ENSGALG00000001250	254.706	249.751	299.984	261.019	330.374	249.231
ENSGALG00000001252	0.270051	0.300307	0.172232	0.201242	0.0564802	0.0929584
ENSGALG00000001253	13.2927	12.6513	14.4439	5.91854	13.8325	8.00833
ENSGALG00000001256	1.29694	1.29717	1.33446	1.28556	1.85279	1.67167
ENSGALG00000001258	27.6498	26.4388	27.2497	31.3535	27.0386	24.0186
ENSGALG00000001262	62.3319	85.9377	62.0703	69.6082	53.8289	68.456
ENSGALG00000001263	0.725973	1.23236	0.623699	1.18956	0.668598	0.745927
ENSGALG00000001264	8.17232	10.0009	7.25746	5.54664	5.75806	4.91505
ENSGALG00000001267	18.3294	17.9053	24.7962	16.7214	22.5732	26.771
ENSGALG00000001270	2.41074	2.81286	5.17062	3.1588	5.57573	7.23632
ENSGALG00000001273	0.151301	0	0.95872	0	1.34067	2.79494
ENSGALG00000001275	22.0745	22.2696	29.1841	22.9098	26.4406	27.3311
ENSGALG00000001276	1.00636	1.44594	0.671311	0	1.032	1.8418
ENSGALG00000001279	10.4628	12.7704	10.6903	11.1303	9.4034	9.09259
ENSGALG00000001282	1.39643	2.91319	1.40594	1.51791	1.05203	1.10281
ENSGALG00000001283	36.653	37.1698	37.1967	42.1494	39.7693	37.5055
ENSGALG00000001288	0.727083	1.26439	2.57868	1.3416	1.66252	3.53421
ENSGALG00000001289	1.64033	2.13923	2.55603	2.50838	1.76977	2.17075
ENSGALG00000001299	0.334653	0.0575054	0.0870431	0	0	0.469308
ENSGALG00000001304	2.07482	1.76293	2.52069	2.72222	3.2775	2.86489
ENSGALG00000001306	6.21675	6.68739	7.83719	6.50019	6.89918	7.26202
ENSGALG00000001309	11.9415	11.2204	17.1702	12.5129	13.4372	23.7108
ENSGALG00000001310	1.74427	1.92553	2.33884	2.34004	3.48385	2.98571
ENSGALG00000001311	0.723312	0.626261	1.61619	0.603418	1.47021	1.6983
ENSGALG00000001313	127.274	137.994	125.034	124.459	111.564	130.949
ENSGALG00000001314	9.37619	12.3646	11.331	10.6935	17.961	12.1221
ENSGALG00000001315	6.48079	6.68798	7.22986	7.33319	6.97431	8.76099
ENSGALG00000001316	7.20637	6.51183	10.2455	8.60992	8.48407	10.8561
ENSGALG00000001317	26.6608	28.6737	38.1215	29.2692	32.2172	44.5138
ENSGALG00000001319	0.315048	0.180418	0.422758	0.382409	0.448802	2.20399
ENSGALG00000001325	0	0	0.21801	0.0592176	0.212945	0.862943
ENSGALG00000001328	246.886	216.493	189.789	237.613	211.856	214.73
ENSGALG00000001329	1.69951	1.85126	2.7365	2.59802	3.99788	2.85463
ENSGALG00000001330	108.024	103.011	80.0482	94.2422	79.2231	85.8431
ENSGALG00000001331	12.8061	18.7661	11.3272	10.6485	8.97253	11.4707
ENSGALG00000001332	4.95183	6.40557	4.07832	5.72474	3.06252	4.70513
ENSGALG00000001333	14.445	10.4543	15.4066	14.5041	17.9883	17.062
ENSGALG00000001334	167.79	177.393	155.316	160.956	158.449	158.273
ENSGALG00000001335	48.714	40.5107	48.05	48.737	46.5529	48.6268
ENSGALG00000001341	6.02325	6.70576	8.06517	4.65187	6.59228	5.29113
ENSGALG00000001342	0.495058	0.744694	1.50174	0.507785	1.00085	1.48226
ENSGALG00000001343	0.225097	0.115747	0.908613	0.234839	1.12844	0.619422
ENSGALG00000001347	0.605203	1.05332	0.677634	1.15619	1.06385	0.920512
ENSGALG00000001350	6.9783	5.93446	10.6717	6.29092	8.05302	11.3797
ENSGALG00000001362	16.0197	13.0636	25.0412	13.9085	19.2492	16.4394
ENSGALG00000001363	6.6278	6.68209	7.02802	7.24783	6.61442	6.68756
ENSGALG00000001364	71.4466	71.1017	73.0427	73.6878	71.5391	72.1244
ENSGALG00000001366	4.50879	4.26678	5.44141	5.86381	5.604	5.93972
ENSGALG00000001369	0.0764841	0	0.0261618	0.0692562	0.083385	0.254021
ENSGALG00000001370	3.40901	7.0492	8.15245	6.81969	4.76955	6.08268
ENSGALG00000001371	37.7202	29.0056	32.3668	3.7962	19.386	14.5419
ENSGALG00000001373	0.390225	0.225764	0.376265	0.618514	0.840575	0.348553
ENSGALG00000001374	22.2484	26.7487	17.7462	27.511	19.4582	16.9613
ENSGALG00000001375	19.5363	14.3404	20.7101	16.3109	17.8665	18.1957
ENSGALG00000001376	7.23801	7.10154	10.9417	5.9128	12.1196	9.6323
ENSGALG00000001377	9.39596	8.18449	8.47186	7.47794	7.42314	8.01823
ENSGALG00000001382	14.8677	16.3647	13.4205	15.6517	12.215	12.4929
ENSGALG00000001383	0.0831491	0.258206	0	0.0162384	0.275219	0.0929944
ENSGALG00000001387	1.71301	2.08154	1.83237	1.02734	2.80682	1.43736
ENSGALG00000001389	2.63363	2.1287	5.13538	2.63687	3.63999	4.09224
ENSGALG00000001391	0.706884	0.232656	0.558966	0.145494	0.174027	0.434272
ENSGALG00000001392	12.8013	14.4917	8.10474	10.9161	8.01504	11.5332
ENSGALG00000001394	16.3095	13.8707	16.1883	16.3706	14.1997	14.8266
ENSGALG00000001405	16.2529	10.7601	44.7942	11.9699	42.2968	56.5801
ENSGALG00000001407	57.7737	49.1625	27.328	41.9981	24.965	22.0878
ENSGALG00000001409	0.220147	0.131805	0.113428	0.106806	0.0862896	0.438665
ENSGALG00000001410	0.218406	0.218524	0.348514	0.169467	0.328799	0.581142
ENSGALG00000001412	32.1246	23.8166	32.3457	21.7474	28.3972	29.9114
ENSGALG00000001416	0.707046	0.16741	0.313461	0.427724	0.289115	0.298505
ENSGALG00000001418	0.206305	0.168296	5.39825	0.480577	1.16107	8.28683
ENSGALG00000001419	10.3716	15.3503	18.9197	12.5197	16.6249	18.613
ENSGALG00000001420	12.3596	13.8909	16.0153	12.0997	11.9923	13.9932
ENSGALG00000001425	4.42596	6.50308	10.7503	8.13484	6.10318	13.7615
ENSGALG00000001428	34.3793	27.3433	39.6192	33.8436	34.6866	46.9924
ENSGALG00000001429	12.5221	10.072	14.1038	10.6767	13.5361	13.5942
ENSGALG00000001433	2.0558	2.36446	2.28477	3.0653	3.62715	5.96894
ENSGALG00000001434	7.7359	8.05299	7.42179	7.6634	8.7982	17.2642
ENSGALG00000001437	3.55143	4.51115	2.09068	3.89236	2.67709	3.71321
ENSGALG00000001439	9.19342	8.11127	10.6898	9.44949	11.2281	13.0348
ENSGALG00000001441	36.0329	33.5113	41.2149	34.4817	43.6334	52.2974
ENSGALG00000001442	0.407822	0.790601	0.840766	0.650062	1.30761	0.694539
ENSGALG00000001445	2.70976	2.09314	2.5792	1.95832	6.86937	3.22613
ENSGALG00000001446	24.3748	27.7148	29.9474	34.0978	36.4694	35.0223
ENSGALG00000001449	18.7741	7.9141	6.79642	8.61717	4.12888	0.890284
ENSGALG00000001450	0.108344	0.114235	0.635689	0.338273	0.472631	0.972309
ENSGALG00000001452	104.002	88.9255	93.1278	85.3241	77.413	87.5131
ENSGALG00000001459	2.29436	1.39746	1.98939	1.37224	1.26433	1.29808
ENSGALG00000001462	0.0280964	0.140775	0.0296165	0.149529	0.186143	0.0631559
ENSGALG00000001463	4.33506	3.45704	4.53133	4.85179	5.29586	3.37995
ENSGALG00000001465	855.749	633.555	541.704	752.266	772.911	835.025
ENSGALG00000001467	15.1096	12.9215	24.7849	7.74504	19.2603	18.2607
ENSGALG00000001470	16.7118	12.2033	11.3492	11.4667	12.8635	9.08162
ENSGALG00000001472	43.3875	46.9752	47.3554	56.7581	45.8091	47.6654
ENSGALG00000001473	14.8786	12.1919	9.38607	10.752	7.83436	7.8259
ENSGALG00000001474	68.011	62.2352	91.6244	64.351	85.1434	100.138
ENSGALG00000001475	210.66	192.048	230.787	165.924	243.615	257.659
ENSGALG00000001476	54.9945	52.6158	44.4889	62.1096	47.8185	55.7337
ENSGALG00000001479	9.36328	9.60012	14.3309	11.3571	11.5597	18.6613
ENSGALG00000001480	1.49636	1.28078	2.75344	2.02568	3.58797	7.41149
ENSGALG00000001483	14.2645	16.6447	18.0725	15.9215	19.4389	18.8197
ENSGALG00000001486	0.159886	0.19755	0.151784	0.335433	0.421248	0.17855
ENSGALG00000001489	26.6801	23.6242	26.3042	25.6007	24.9071	19.9771
ENSGALG00000001490	0.0966814	0.0484634	0.0506678	0.0856204	0	0.163397
ENSGALG00000001491	5.21103	6.84566	10.3353	5.56388	7.73878	13.9494
ENSGALG00000001492	57.7789	44.3914	61.8749	43.0241	47.5218	51.4916
ENSGALG00000001501	50.8448	53.921	55.6618	39.317	55.901	48.9095
ENSGALG00000001502	24.1655	22.6216	20.3242	24.0792	22.1293	22.7897
ENSGALG00000001503	14.1386	12.2451	18.4508	11.7975	17.0812	19.6814
ENSGALG00000001504	9.14115	6.93608	15.497	8.92538	12.0621	18.5249
ENSGALG00000001506	65.8553	47.6155	67.2673	46.4278	75.4532	69.7612
ENSGALG00000001513	2.32827	2.16399	2.94484	1.89381	3.92443	2.96972
ENSGALG00000001521	16.8837	19.0016	21.4589	18.367	17.8588	16.3686
ENSGALG00000001522	6.64426	7.17543	9.53172	6.69346	9.38911	8.81624
ENSGALG00000001525	18.66	15.1088	18.7762	17.7173	19.734	22.4286
ENSGALG00000001527	5.84911	9.87271	9.03178	9.41485	7.60082	10.336
ENSGALG00000001529	28.0686	24.6132	22.4514	23.6232	25.1674	24.6917
ENSGALG00000001531	1.77362	1.44679	3.12975	1.26498	3.21162	3.19619
ENSGALG00000001534	0.123373	0.0309107	0.22435	0.110563	0.16961	0.239094
ENSGALG00000001536	8.06754	8.23043	9.27936	11.0168	7.75303	8.49718
ENSGALG00000001538	20.5211	15.1111	29.1418	18.6505	26.7892	30.5034
ENSGALG00000001540	20.7055	22.5303	18.7401	21.284	20.6969	19.8282
ENSGALG00000001542	48.1768	46.676	40.3146	50.1236	33.9796	37.3761
ENSGALG00000001545	0.939259	1.04663	0.719098	1.04127	1.10387	0.82845
ENSGALG00000001546	2.97757	3.27749	3.2668	1.45627	2.76599	1.53348
ENSGALG00000001547	60.0605	55.1769	50.5931	50.5261	42.5187	48.3991
ENSGALG00000001550	46.5429	48.0459	51.6602	51.9728	45.7579	45.482
ENSGALG00000001551	36.4388	39.9775	40.8256	46.8534	39.9614	48.3363
ENSGALG00000001555	23.0255	17.5796	18.9245	21.8495	18.1834	23.4265
ENSGALG00000001557	10.1797	8.10019	8.90394	9.62287	10.292	11.5954
ENSGALG00000001558	32.3217	30.3093	27.4567	27.3397	21.9472	20.3635
ENSGALG00000001559	1869.47	1426.77	963.01	853.855	1540.58	846.334
ENSGALG00000001561	25.9561	42.6842	28.832	42.2891	37.2204	36.2466
ENSGALG00000001563	29.8029	26.0156	34.1827	22.896	33.7271	33.5985
ENSGALG00000001564	1.86776	2.53932	3.08063	3.79658	4.95484	3.86843
ENSGALG00000001565	0.539741	0.356394	3.65947	0.665833	1.91439	3.81598
ENSGALG00000001568	32.3884	27.1149	29.6413	30.3614	28.7482	29.7345
ENSGALG00000001569	63.6483	52.1115	57.2083	54.6631	45.1732	45.7319
ENSGALG00000001571	1.38203	1.4597	1.29114	2.70882	2.85857	2.28985
ENSGALG00000001572	41.9336	36.2862	33.6845	44.9933	42.5981	37.7458
ENSGALG00000001573	0.143108	0.255914	0.383164	0.282048	0.375066	2.06927
ENSGALG00000001577	13.1186	12.6514	12.826	12.2736	13.7557	15.2705
ENSGALG00000001583	1.14945	0.843844	1.28216	1.078	1.93043	1.69628
ENSGALG00000001586	8.87401	8.97491	7.6796	7.69489	9.15028	8.99023
ENSGALG00000001593	21.3198	23.9357	26.8904	29.9123	23.7665	25.0861
ENSGALG00000001595	1.93978	2.18263	1.87256	2.47672	1.85824	2.09402
ENSGALG00000001596	8.33608	13.8331	12.4001	10.5861	10.6193	12.3668
ENSGALG00000001597	46.0117	44.3776	37.6196	47.1797	38.7797	44.0459
ENSGALG00000001600	6.40188	7.81872	7.27639	7.80244	7.67669	7.96753
ENSGALG00000001602	89.1881	85.0151	85.2245	85.858	81.848	97.518
ENSGALG00000001603	4.24152	3.72166	13.5776	6.44257	9.93538	15.9418
ENSGALG00000001604	28.7032	19.7293	19.9775	11.2466	20.9837	18.4266
ENSGALG00000001605	3.742	4.29392	7.38256	3.63634	3.87009	6.31823
ENSGALG00000001606	7.87242	9.52752	12.6826	9.53761	11.0312	12.2513
ENSGALG00000001607	11.0587	9.62475	13.5892	12.9432	13.2303	15.0973
ENSGALG00000001608	0.667726	0.831761	1.36588	1.07503	0.937611	3.05553
ENSGALG00000001610	7.59685	8.00528	9.76963	8.31368	8.32142	8.93418
ENSGALG00000001611	0.48969	0.473193	0.529977	0.334747	0.524794	0.78234
ENSGALG00000001613	27.5149	26.3588	29.7706	28.632	23.743	22.3183
ENSGALG00000001615	5.91757	5.63358	6.70562	7.34441	6.90638	6.0824
ENSGALG00000001616	12.7177	14.3309	16.5337	14.2123	17.6415	18.6256
ENSGALG00000001617	0.785764	0.533292	1.15114	0.879256	1.43941	1.77666
ENSGALG00000001618	5.78503	5.41071	12.7864	10.7865	11.1596	16.1734
ENSGALG00000001619	6.62795	6.37511	10.5671	6.43073	9.81297	10.9076
ENSGALG00000001620	0.807809	0.58718	1.73706	0.730257	2.43336	2.92435
ENSGALG00000001621	7.66649	9.53822	10.3725	13.0804	10.6529	13.1003
ENSGALG00000001624	6.09397	4.44198	6.88301	5.97029	6.40068	7.23847
ENSGALG00000001633	9.60831	7.33616	18.3338	12.9959	15.9334	24.1979
ENSGALG00000001634	1258.67	1114.89	917.51	1258.35	1085.39	1245.21
ENSGALG00000001637	4.33138	4.35895	6.33961	3.75292	5.62101	5.73132
ENSGALG00000001639	7.13464	7.45545	11.0609	5.58703	9.06087	12.8428
ENSGALG00000001640	34.0936	29.4198	41.4013	38.798	41.0389	41.2688
ENSGALG00000001642	44.0345	47.2624	31.4642	42.5696	25.916	32.5974
ENSGALG00000001644	9.55601	9.74915	10.8444	9.76896	10.5159	11.3507
ENSGALG00000001645	1.13776	0.943881	2.58662	1.1346	3.50477	1.83776
ENSGALG00000001647	6.49436	7.23918	8.50707	7.03472	8.41931	9.11916
ENSGALG00000001651	3.72967	3.23228	3.85541	4.24636	4.66316	5.2265
ENSGALG00000001652	121.89	122.759	111.736	134.503	103.889	101.608
ENSGALG00000001653	0.395063	0.824202	0.649404	1.0219	0.833262	0.883323
ENSGALG00000001654	120.548	103.934	100.019	111.563	121.915	98.2295
ENSGALG00000001655	122.481	102.885	92.0096	104.224	100.73	101.009
ENSGALG00000001658	590.71	591.099	508.54	576.109	524.778	607.441
ENSGALG00000001662	0.0314949	0.0435221	0.549539	0.15021	0.753923	1.26804
ENSGALG00000001663	15.9365	16.6514	14.7859	15.3716	15.3054	16.508
ENSGALG00000001664	18.5857	21.9237	11.7651	20.0999	12.9067	11.1797
ENSGALG00000001666	9.87804	9.17907	13.8106	12.4075	21.401	21.3111
ENSGALG00000001668	14.5475	15.7338	15.3949	15.9116	14.8792	14.3554
ENSGALG00000001678	5.66778	5.98178	11.9904	6.18401	10.4189	14.0203
ENSGALG00000001682	11.4716	10.0413	13.6616	9.80472	15.9892	17.4984
ENSGALG00000001684	30.0943	34.1184	31.0824	29.4519	27.2086	34.4417
ENSGALG00000001688	18.042	24.9997	28.5484	22.3448	24.8185	35.508
ENSGALG00000001689	56.2861	50.7869	54.6358	59.8771	52.6007	53.6796
ENSGALG00000001690	0.38012	0.473938	1.44265	1.62096	0.698243	2.45671
ENSGALG00000001691	16.2542	18.5823	17.7616	16.2317	16.6877	17.7279
ENSGALG00000001692	12.3938	9.79598	17.3763	6.92697	20.5955	13.3275
ENSGALG00000001693	0.151298	0.188953	0.0390128	0.339419	0.20752	0.0836097
ENSGALG00000001696	1.42954	1.45628	1.61519	3.33083	3.26379	2.4113
ENSGALG00000001697	0.0177093	0	0.209534	0.0924588	0.0386025	0.0803413
ENSGALG00000001698	0.867837	1.14141	1.85698	3.51241	0.695649	3.57486
ENSGALG00000001701	5.15645	3.7402	5.65962	7.16126	7.60304	8.23363
ENSGALG00000001702	5.83255	3.23719	2.85485	4.44104	2.4248	2.56553
ENSGALG00000001708	12.1076	12.4026	11.8641	12.176	11.0782	9.91725
ENSGALG00000001709	1.92287	0.572637	1.79509	1.35194	0.470426	1.52119
ENSGALG00000001711	2.93925	3.86613	3.75265	3.57131	3.42184	4.28648
ENSGALG00000001714	6.29693	5.46302	5.95056	5.16332	9.51661	7.93611
ENSGALG00000001716	0.660065	0.75583	0.486855	1.86379	0.313015	0.75612
ENSGALG00000001717	63.6875	82.0421	59.462	72.2286	56.7464	73.9252
ENSGALG00000001718	46.194	34.8549	50.6663	41.5757	31.9258	42.3684
ENSGALG00000001720	8.77689	9.23662	7.41216	7.39909	7.47241	6.26482
ENSGALG00000001721	4.09881	2.67428	36.8936	9.79294	17.9171	64.3217
ENSGALG00000001722	9.61295	9.89239	11.8532	10.9769	10.0365	13.4287
ENSGALG00000001725	6.68865	7.68687	9.17045	7.16032	8.75649	8.41427
ENSGALG00000001726	25.5482	25.4558	18.8197	23.4841	18.5056	16.1786
ENSGALG00000001727	4.65131	5.31598	10.0227	6.56121	5.93338	8.75747
ENSGALG00000001728	6.40366	8.57951	8.41494	5.60321	7.5855	7.37201
ENSGALG00000001729	18.6719	21.4443	14.0748	21.8552	14.2946	12.2312
ENSGALG00000001730	7.74911	8.52026	11.718	5.07776	10.417	8.63361
ENSGALG00000001731	9.18581	10.0095	10.41	8.97091	8.9005	10.4174
ENSGALG00000001733	14.0376	14.2304	17.6724	10.553	14.6054	17.3392
ENSGALG00000001737	12.0178	11.986	12.85	11.1137	11.042	11.8929
ENSGALG00000001740	0.784537	5.0429	4.26016	4.98262	2.00177	4.91345
ENSGALG00000001741	72.5017	67.4841	66.2421	74.9262	67.8475	63.8064
ENSGALG00000001749	8.84969	5.79375	14.6487	9.04558	14.5373	20.4351
ENSGALG00000001750	62.6785	58.7671	43.6467	50.2798	41.4386	32.0699
ENSGALG00000001753	1.22747	1.70831	1.27094	0.847319	1.35972	1.01681
ENSGALG00000001758	9.2223	8.90658	14.0672	7.85793	11.2043	16.957
ENSGALG00000001764	1.53948	4.04606	1.18711	2.51832	0.868943	1.12804
ENSGALG00000001765	3.79781	4.6397	4.08604	3.43319	4.04554	3.79721
ENSGALG00000001768	1.05505	0.995757	3.28714	1.2872	1.35703	2.18639
ENSGALG00000001773	9.32138	7.31106	12.9955	6.31111	11.5825	9.55397
ENSGALG00000001774	4.56588	7.44389	6.9905	5.84424	6.44311	6.95733
ENSGALG00000001777	17.4393	18.0693	27.2077	17.9783	22.3402	26.2531
ENSGALG00000001779	3.90525	2.04064	2.36386	2.63666	2.04633	3.42816
ENSGALG00000001780	0.201719	0.427239	0.239518	0.246542	0.193122	0.141467
ENSGALG00000001782	11.2161	10.8897	14.9265	10.044	12.4053	18.2174
ENSGALG00000001788	29.8617	30.3967	24.768	30.7882	24.9006	27.8911
ENSGALG00000001790	6.56089	5.87231	5.53797	4.65924	5.29281	5.13994
ENSGALG00000001791	3.3432	4.69585	5.91756	5.63426	6.46243	5.85896
ENSGALG00000001792	40.7048	42.699	37.7238	41.584	58.2968	54.5639
ENSGALG00000001797	11.4671	11.5761	20.8846	11.384	9.54149	18.926
ENSGALG00000001798	4.94732	4.27999	7.37815	5.60734	6.61479	10.315
ENSGALG00000001800	5.29739	3.86393	3.56653	4.4694	4.69895	4.56913
ENSGALG00000001801	4.26256	4.89012	5.36443	4.18372	3.65062	5.71164
ENSGALG00000001802	14.4105	19.6432	17.7012	11.4978	14.6874	13.2201
ENSGALG00000001803	15.1638	15.4577	17.415	15.1193	15.4284	16.5377
ENSGALG00000001805	34.5205	40.7226	45.6337	40.8924	36.7897	50.6594
ENSGALG00000001806	0.162866	0.0976786	0.101869	0.174806	0	0.10938
ENSGALG00000001812	0.982878	2.104	2.45536	1.80955	1.22846	2.12543
ENSGALG00000001816	4.29909	4.03607	6.12277	4.17224	5.37675	7.12391
ENSGALG00000001817	18.2725	18.388	15.9011	19.9402	16.3059	18.2873
ENSGALG00000001823	41.0315	36.3357	50.7872	39.7257	46.365	47.3849
ENSGALG00000001824	0.950775	1.39372	1.30312	1.75096	1.25675	0.877835
ENSGALG00000001826	7.56176	5.88184	12.482	7.59294	9.84945	11.6094
ENSGALG00000001828	0.46968	0.460663	0.765168	0.774202	0.889143	0.949127
ENSGALG00000001833	34.8364	28.1775	47.1938	36.2991	43.9882	48.5463
ENSGALG00000001837	10.783	15.1599	13.0428	16.7117	11.1782	19.927
ENSGALG00000001838	19.5661	18.4257	23.0348	18.4376	21.5491	22.3958
ENSGALG00000001840	2.93501	5.37246	3.20413	4.92754	4.9252	4.89445
ENSGALG00000001841	10.798	9.17929	17.6938	9.17957	15.1888	14.976
ENSGALG00000001844	2.3851	1.77482	2.84358	3.05218	1.62281	3.57953
ENSGALG00000001845	6.59164	5.52735	5.81386	7.52292	5.2121	5.15098
ENSGALG00000001848	29.9261	28.7012	43.0635	26.3528	35.8427	46.0401
ENSGALG00000001849	0.282999	0.395858	0.373324	0.335782	0.344259	0.36289
ENSGALG00000001850	23.4213	24.9266	22.6839	24.6717	22.0696	24.4891
ENSGALG00000001852	14.3359	16.4251	16.4018	16.9313	15.4307	15.5068
ENSGALG00000001856	11.9754	7.96774	10.3741	6.06277	11.0572	6.99103
ENSGALG00000001857	2.03465	0.779746	5.90608	1.94288	5.54285	9.31194
ENSGALG00000001859	4.36645	5.31498	5.91815	3.93227	4.53635	5.24865
ENSGALG00000001860	4.8166	5.3972	6.2492	5.69148	6.02996	6.138
ENSGALG00000001862	1.24874	0.870405	1.56295	0.913614	3.36949	1.76064
ENSGALG00000001863	0.152319	0.179024	0.208859	0.110337	0.160496	0.223248
ENSGALG00000001864	1.03981	1.04032	1.85205	2.21674	1.67639	1.20932
ENSGALG00000001866	0	0.0529313	0.165032	0.0949879	0.0585828	0.0593728
ENSGALG00000001869	0.0202604	0.020291	0.34186	0.035895	0.133324	0.113676
ENSGALG00000001872	53.1514	52.9257	40.4995	49.0934	44.264	36.5267
ENSGALG00000001876	6.98672	6.79239	6.54396	7.77002	6.20558	6.08532
ENSGALG00000001882	0.294519	0.283632	0.172513	0.223626	0.426271	0.211601
ENSGALG00000001883	2.38682	1.47836	6.91709	2.33773	4.93384	10.8696
ENSGALG00000001889	1.92664	1.62468	1.95292	2.50953	3.62373	2.5754
ENSGALG00000001892	11.5894	18.9142	14.3107	19.5637	14.2638	23.1192
ENSGALG00000001894	0.0982891	0.0280134	0.0593678	0.174877	0.384481	0.253982
ENSGALG00000001895	30.0714	32.299	32.1413	12.6155	29.9776	19.9322
ENSGALG00000001901	21.0095	21.2794	24.1074	19.374	21.2087	25.619
ENSGALG00000001905	8.5722	7.12928	26.9861	9.50031	15.9591	38.8099
ENSGALG00000001907	16.6521	16.6921	15.4005	13.5151	15.5738	13.9413
ENSGALG00000001912	0.0280532	0.013787	0.949224	0.307225	0.509723	2.20089
ENSGALG00000001916	9.93547	10.7484	14.567	9.39955	11.9861	10.4084
ENSGALG00000001918	4.84536	5.39731	5.90578	3.35213	3.57394	3.85367
ENSGALG00000001921	2.03423	1.0193	1.81102	1.24022	1.29383	1.2279
ENSGALG00000001925	4.34221	4.32443	5.39641	4.9119	5.69493	5.5499
ENSGALG00000001926	170.679	259.859	186.949	349.627	127.371	146.702
ENSGALG00000001933	11.9526	8.30902	5.61432	5.05081	13.5785	9.47879
ENSGALG00000001935	0.0280023	0.0276991	0.116466	0	0.183955	0.189519
ENSGALG00000001938	23.1555	24.8127	28.8104	22.3716	24.3305	32.5564
ENSGALG00000001939	11.6052	14.2656	11.9325	11.0931	12.3042	8.85586
ENSGALG00000001942	10.6214	9.99858	15.7273	12.3049	13.5464	18.7887
ENSGALG00000001943	3.31377	3.57524	6.14086	3.59543	4.15599	5.57384
ENSGALG00000001944	3.02522	2.88278	4.19133	3.96017	5.45365	4.94004
ENSGALG00000001945	8.8056	10.6393	9.34698	11.1841	10.8529	11.0082
ENSGALG00000001946	2.88911	1.73627	2.54136	3.83706	7.4234	9.52635
ENSGALG00000001947	10.9979	11.9162	11.0174	11.6254	10.4635	10.2726
ENSGALG00000001948	15.6681	14.2654	15.672	17.1708	14.4371	16.5764
ENSGALG00000001949	78.5386	79.0436	59.412	69.9086	49.469	56.0952
ENSGALG00000001950	24.9117	23.0009	21.4556	21.6914	20.4383	19.7085
ENSGALG00000001951	6.2321	6.80899	7.36792	5.53936	7.55437	9.29163
ENSGALG00000001954	5.42397	4.85372	5.37629	4.98687	6.62562	8.23292
ENSGALG00000001956	12.4627	17.6968	10.3358	16.7389	9.94258	12.152
ENSGALG00000001959	0.718376	0.474231	5.06272	1.07572	2.7169	4.27737
ENSGALG00000001962	67.0428	80.1255	69.7456	71.7926	64.6698	68.844
ENSGALG00000001963	1.55979	1.17835	1.79533	1.61466	1.78344	2.60807
ENSGALG00000001964	5.75484	6.43708	7.54366	6.3781	7.38438	7.2704
ENSGALG00000001965	28.6545	34.4357	24.6898	29.7479	22.021	24.5655
ENSGALG00000001968	0.372505	0.959021	0.437171	0.911696	0.549571	1.12224
ENSGALG00000001971	9.51683	9.4213	23.2563	9.60644	16.3617	24.8515
ENSGALG00000001972	21.2906	19.9923	19.6195	19.9578	19.0471	17.2188
ENSGALG00000001973	10.4539	9.77912	15.5195	10.3856	12.1072	17.7375
ENSGALG00000001975	18.1138	14.4253	15.3695	15.5306	14.2742	16.2942
ENSGALG00000001976	5.72443	5.45976	12.1793	5.26134	10.3489	11.8164
ENSGALG00000001977	0.0643323	0.107874	0.184354	0.0940153	0.117848	0.439598
ENSGALG00000001978	13.4737	10.9129	16.3702	12.1117	16.7489	18.0042
ENSGALG00000001981	6.65138	5.24769	4.94393	6.53511	5.52329	6.3257
ENSGALG00000001983	0.548644	0.356624	1.1835	0.469234	0.83447	1.70248
ENSGALG00000001985	4.64218	3.85767	6.22195	4.95154	4.47314	5.09772
ENSGALG00000001986	86.5289	82.5115	90.0923	84.8938	79.2459	78.0743
ENSGALG00000001988	6.44712	4.90833	7.56755	4.98849	6.90749	7.22543
ENSGALG00000001992	395.574	355.083	540.698	289.507	460.702	503.832
ENSGALG00000001995	23.0344	39.4036	26.0544	32.2422	26.8086	29.2185
ENSGALG00000001996	0.810592	0.804883	1.85796	1.11623	2.0609	2.29475
ENSGALG00000001998	10.3796	10.695	18.4276	12.1024	14.8972	17.6525
ENSGALG00000002000	16.4978	11.3138	33.0786	10.8352	31.359	36.381
ENSGALG00000002001	12.3599	10.658	27.786	12.0479	23.0771	32.8365
ENSGALG00000002002	39.3535	32.9028	38.2389	38.6652	39.5981	41.4648
ENSGALG00000002003	9.4496	9.53824	11.2187	6.47366	10.0998	11.8896
ENSGALG00000002008	3.17129	2.69746	4.78704	3.1542	4.97675	3.64809
ENSGALG00000002009	2.68898	2.50994	3.10474	3.61242	2.50746	4.58959
ENSGALG00000002010	12.8259	10.7156	15.6613	13.6426	12.3343	15.5447
ENSGALG00000002012	9.50014	12.1573	8.41323	12.6273	9.59859	12.8848
ENSGALG00000002013	52.749	44.0811	54.2911	55.404	55.2077	59.298
ENSGALG00000002014	25.5276	26.1498	22.3754	25.5648	22.5836	24.1101
ENSGALG00000002015	0.831756	0.761879	0.512104	0.636715	0.2694	0.448974
ENSGALG00000002016	6.84775	5.87367	8.42806	5.08709	9.56668	9.37003
ENSGALG00000002018	9.51149	10.192	9.59201	10.1317	8.89814	9.26758
ENSGALG00000002021	5.55489	5.79299	8.83558	5.22572	8.62644	9.53341
ENSGALG00000002022	31.6689	29.4885	23.481	28.2089	20.1708	21.1741
ENSGALG00000002023	4.31833	3.43715	5.34742	3.1459	4.6806	5.7206
ENSGALG00000002024	9.10462	7.14158	9.57571	11.3222	8.17975	11.9598
ENSGALG00000002028	1.68356	2.65473	3.01625	2.17639	3.54744	2.89201
ENSGALG00000002029	20.0224	17.6145	25.3209	19.0929	21.3254	30.1382
ENSGALG00000002033	175.453	158.716	131.649	157.895	130.692	144.68
ENSGALG00000002038	3.07051	4.32317	2.55932	4.14312	2.95059	3.03299
ENSGALG00000002042	8.2196	8.15977	9.20702	8.30397	8.47469	9.16163
ENSGALG00000002043	6.20097	6.67587	4.89119	7.15619	5.31009	4.55856
ENSGALG00000002044	5.16086	4.76094	4.06178	5.39247	6.23542	5.87275
ENSGALG00000002046	6.02956	4.13383	5.22487	3.51016	6.95025	6.49627
ENSGALG00000002048	1.49121	1.14062	1.59727	1.49084	1.61053	1.42821
ENSGALG00000002050	20.0946	20.1492	23.6138	20.887	20.4649	26.5761
ENSGALG00000002053	117.552	128.594	89.3827	141.888	87.7852	107.189
ENSGALG00000002055	5.41256	4.96869	25.4775	7.93839	13.9788	15.5078
ENSGALG00000002056	18.8368	15.3405	24.505	17.3218	14.9906	21.3725
ENSGALG00000002057	34.6325	28.9501	34.7379	29.5769	34.1771	36.3182
ENSGALG00000002060	42.463	45.5053	37.4209	44.1688	37.5148	36.182
ENSGALG00000002062	24.1288	25.2907	25.7702	26.4392	22.4403	25.49
ENSGALG00000002064	26.0553	26.7987	32.874	24.6709	30.5065	33.7529
ENSGALG00000002066	81.7735	59.0886	80.302	58.8846	66.6093	69.321
ENSGALG00000002067	7.41676	5.78269	7.29044	7.29361	6.6257	7.82589
ENSGALG00000002069	5.51275	4.93233	5.51378	11.121	5.76558	5.80724
ENSGALG00000002070	10.9552	10.9613	12.3099	10.8027	12.2697	11.9761
ENSGALG00000002080	0.580761	0.627952	1.25423	0.986216	1.43935	1.42364
ENSGALG00000002081	1.62714	3.69499	4.21113	3.69482	5.46814	3.73575
ENSGALG00000002082	0.0884694	0.0529927	0.166705	0.0157905	0.0773681	0.257465
ENSGALG00000002083	1.74294	1.28866	25.4437	5.93801	11.5814	45.05
ENSGALG00000002085	17.3051	13.9839	25.155	14.3714	22.4102	31.4622
ENSGALG00000002086	1.55988	1.29852	0.265609	1.91758	0.951063	1.04759
ENSGALG00000002087	6.80892	8.34485	8.03902	7.36076	6.51245	7.31724
ENSGALG00000002088	1.59478	1.45736	2.06882	3.2653	2.7769	2.24835
ENSGALG00000002089	37.9993	39.5066	37.6645	36.6016	39.8981	41.1118
ENSGALG00000002090	6.37026	8.26124	6.86185	7.55953	6.53496	7.51409
ENSGALG00000002091	1.0611	0.363058	0.384725	2.76756	1.96786	3.59485
ENSGALG00000002094	10.7366	11.5923	12.0641	12.5743	11.5228	11.1722
ENSGALG00000002095	60.9359	53.2081	60.7952	58.299	59.1966	51.0802
ENSGALG00000002099	10.3911	12.86	15.2833	8.35472	16.7987	17.0396
ENSGALG00000002102	1.28109	1.42057	2.17779	5.7018	10.7875	0.881221
ENSGALG00000002103	19.0025	11.809	8.12691	3.942	8.61775	8.96163
ENSGALG00000002105	0.238871	0.0863834	0.257846	0.284199	0.317952	1.12033
ENSGALG00000002106	17.5335	16.5433	14.8197	12.1705	17.6862	14.1659
ENSGALG00000002107	59.3805	62.6592	46.1492	58.0771	44.6222	43.5697
ENSGALG00000002110	2.40683	2.47609	3.2806	1.58108	2.66103	2.82426
ENSGALG00000002111	0.38304	0.110969	0.468822	0.689452	1.08691	2.38791
ENSGALG00000002112	1.85455	1.98035	1.34006	3.53012	4.85226	3.22044
ENSGALG00000002113	0.720693	0.622583	0.738793	1.58847	2.28581	1.11524
ENSGALG00000002116	0.837214	1.13305	1.84735	0.8084	1.39074	2.07181
ENSGALG00000002117	17.9905	17.1386	18.2048	16.2699	17.7043	17.5845
ENSGALG00000002118	19.4674	20.4493	13.9895	28.2657	12.6663	29.3154
ENSGALG00000002119	19.5978	17.2468	25.2788	17.2209	25.6868	23.6303
ENSGALG00000002123	1.80791	2.11841	2.02842	2.75052	2.23225	2.3048
ENSGALG00000002124	4.46066	5.27416	5.34956	3.40096	6.08338	3.61621
ENSGALG00000002125	0.793688	0.590301	0.747913	1.16723	0.541105	0.863164
ENSGALG00000002127	7.28358	4.38829	6.39223	6.0071	9.89929	9.40373
ENSGALG00000002129	8.1081	9.26064	18.615	9.10714	14.2634	22.2946
ENSGALG00000002131	11.1024	11.3766	10.9152	13.0338	10.9315	11.7603
ENSGALG00000002132	3.27603	1.34968	6.08762	2.58949	3.69847	4.7994
ENSGALG00000002137	26.9508	29.8684	30.5373	28.3285	30.3072	28.3239
ENSGALG00000002138	11.4717	13.9138	12.1009	13.0217	11.1513	12.5436
ENSGALG00000002139	121.45	123.866	136.044	113.014	141.104	122.966
ENSGALG00000002141	19.5057	20.2608	18.5038	12.7522	13.3195	12.9146
ENSGALG00000002142	6.74415	4.85622	19.8812	0.70834	14.2619	7.85015
ENSGALG00000002143	6.91427	9.43492	9.41977	8.19862	8.5202	9.66019
ENSGALG00000002144	48.9541	50.6679	40.5811	48.5937	45.2349	39.6821
ENSGALG00000002145	11.4356	9.89142	13.003	6.14144	13.7474	8.71282
ENSGALG00000002147	36.9477	37.9343	50.4475	35.6741	45.6343	55.0654
ENSGALG00000002150	3.48216	2.43426	19.8931	7.65556	12.3226	36.3766
ENSGALG00000002151	5.8282	6.19157	8.73266	5.89012	10.2719	9.74643
ENSGALG00000002152	0.195942	0.105577	0.449853	0.732725	0.760256	0.558273
ENSGALG00000002155	21.6352	30.1031	22.7515	27.3897	23.6452	21.2471
ENSGALG00000002157	553.346	494.646	488.356	567.82	573.861	600.645
ENSGALG00000002158	11.9258	12.0934	16.2044	8.95525	11.4104	13.3374
ENSGALG00000002159	41.4269	40.4758	34.7329	29.5588	34.7612	32.0751
ENSGALG00000002160	352.281	342.134	407.057	418.288	656.231	447.663
ENSGALG00000002162	30.0216	29.5657	28.3896	21.3058	30.6018	32.0514
ENSGALG00000002164	9.14803	6.25098	13.427	7.51202	11.9346	14.9355
ENSGALG00000002165	3.86422	4.93543	3.61818	1.67258	2.57651	3.34998
ENSGALG00000002167	3.28413	2.54577	6.94176	4.99543	5.72687	10.1946
ENSGALG00000002169	54.9032	53.346	41.196	53.58	63.1983	40.7476
ENSGALG00000002170	0.835442	0.387577	0.26255	0.696494	0.293273	0.561706
ENSGALG00000002172	23.8671	28.7516	24.9139	22.2553	25.7072	24.0445
ENSGALG00000002175	3.82132	4.70597	5.0066	2.63939	3.59576	2.19128
ENSGALG00000002179	5.26752	8.31236	9.01596	8.66187	8.61297	6.62695
ENSGALG00000002180	10.6559	10.9619	14.2525	8.15013	13.4305	12.9686
ENSGALG00000002182	18.7329	12.821	9.62556	5.54289	4.68362	3.40416
ENSGALG00000002183	5.17297	4.98975	9.382	5.61826	10.1813	7.46647
ENSGALG00000002187	19.4459	22.0165	19.368	23.6068	18.9343	17.4201
ENSGALG00000002189	94.2705	71.2954	177.929	72.2541	144.1	175.403
ENSGALG00000002192	1.99724	1.57897	1.59346	3.59695	4.71563	2.84626
ENSGALG00000002193	4.9185	4.63072	5.26612	5.82297	3.87949	4.56056
ENSGALG00000002194	16.8345	14.5456	18.1428	15.3764	15.9403	18.9858
ENSGALG00000002197	278.704	277.776	244.137	261.542	256.769	287.609
ENSGALG00000002198	7.9828	7.9022	4.193	5.73869	3.72086	3.3793
ENSGALG00000002199	0.705845	0.968617	0.435438	1.10509	0.88303	0.667641
ENSGALG00000002201	16.1042	12.8555	18.1984	19.4799	22.3139	21.1866
ENSGALG00000002203	0.78217	0.280184	0.533418	0.809048	1.49408	1.23034
ENSGALG00000002204	1.52162	1.13071	4.65552	2.48981	3.00216	6.26556
ENSGALG00000002205	7.63053	7.51537	8.62278	8.3977	8.48346	7.59386
ENSGALG00000002207	0.123371	0.173243	0.0265977	0.172055	0.161508	0.196095
ENSGALG00000002210	701.963	727.307	617.115	737.403	590.77	522.659
ENSGALG00000002216	12.2593	11.533	16.9278	13.5082	16.1915	21.1463
ENSGALG00000002219	42.7114	35.1187	66.129	35.1432	61.3851	71.0384
ENSGALG00000002222	16.0399	15.4759	16.6906	16.0116	13.8637	18.0525
ENSGALG00000002223	1.98846	2.68428	2.06969	2.28397	4.4675	3.6214
ENSGALG00000002225	7.6396	8.11986	13.274	6.42682	10.5925	16.6048
ENSGALG00000002227	1.562	1.17164	1.31569	0.662862	2.06418	1.23584
ENSGALG00000002229	28.788	27.9227	34.2809	23.6392	28.3196	36.4227
ENSGALG00000002232	11.6665	14.9586	13.8121	11.0228	12.8562	10.83
ENSGALG00000002234	0.735871	0.480742	0.676973	0.607033	0.940657	0.701245
ENSGALG00000002237	33.2725	31.5013	44.8642	30.6373	34.9679	37.4683
ENSGALG00000002239	5.24388	4.68611	4.50383	4.96444	5.2229	5.00641
ENSGALG00000002240	1.63142	1.06888	1.49419	3.00661	2.64434	2.33671
ENSGALG00000002242	0.907277	0.787918	0.52455	0.698981	1.01893	0.85163
ENSGALG00000002244	0.284942	0.226338	0.116345	0.411866	0.377659	0.316421
ENSGALG00000002246	1.27565	1.43862	2.62022	0.622541	3.01743	3.46067
ENSGALG00000002247	9.15611	7.4151	9.89916	9.91815	6.80633	8.16873
ENSGALG00000002249	15.7889	16.0581	13.0634	14.5768	10.3967	10.6033
ENSGALG00000002250	0.725482	0.638745	0.867858	0.865082	0.849753	0.734474
ENSGALG00000002253	3.80869	2.41242	3.89277	3.3062	4.03513	4.98208
ENSGALG00000002260	32.7673	35.7769	33.5886	27.1611	30.9103	34.0178
ENSGALG00000002262	37.8417	38.0672	45.9335	30.5422	37.1308	44.5174
ENSGALG00000002263	1.03717	1.40718	1.3772	1.45248	1.97214	1.5141
ENSGALG00000002266	3.18083	2.68041	7.81564	1.60039	3.85274	7.34192
ENSGALG00000002267	6.15721	7.14872	7.47206	5.10561	6.67203	6.83156
ENSGALG00000002272	37.508	30.5688	26.2349	24.3454	18.2657	18.1995
ENSGALG00000002273	8.72605	7.84189	9.7294	11.002	9.08235	8.86324
ENSGALG00000002276	1.30389	2.42121	2.69893	1.72842	2.03038	4.29774
ENSGALG00000002277	8.35445	7.9712	13.7739	7.37226	12.8824	13.5722
ENSGALG00000002278	3.12442	3.81737	3.79939	4.60834	4.27429	4.75342
ENSGALG00000002282	27.6461	32.6893	23.8717	29.3841	20.0253	25.4631
ENSGALG00000002283	6.52759	4.9421	19.246	13.4152	10.4335	10.3815
ENSGALG00000002284	29.1867	29.6972	28.9201	32.3999	34.1685	34.7519
ENSGALG00000002285	24.6451	18.2519	39.9111	19.074	31.8256	42.5559
ENSGALG00000002286	312.683	279.05	264.954	298.131	318.957	334.708
ENSGALG00000002287	0.0313394	0	0.100494	0.12452	0.687018	0.159051
ENSGALG00000002288	11.0469	9.96604	10.2584	11.2642	10.4746	8.52061
ENSGALG00000002289	0.0159173	0.0159368	0.374764	0.0140688	0.0174359	0.0359117
ENSGALG00000002294	11.739	8.65796	6.77405	9.0335	7.26867	4.5114
ENSGALG00000002298	7.3853	16.5538	5.93218	16.4124	6.17996	4.86732
ENSGALG00000002301	21.8422	22.9738	27.4659	19.5589	26.0244	26.2123
ENSGALG00000002304	16.6537	18.0066	20.8628	18.0278	18.6951	19.1567
ENSGALG00000002305	2.89169	3.04372	3.3817	2.04673	4.86206	3.31099
ENSGALG00000002307	0	0	0.953113	0.158777	0.876265	1.57863
ENSGALG00000002308	11.7506	13.4916	10.6706	11.6987	21.4133	13.1623
ENSGALG00000002311	8.09708	7.71504	7.47169	8.253	7.96734	5.47219
ENSGALG00000002312	0.549052	0.250945	0.324602	1.6029	0.249084	0.398963
ENSGALG00000002313	9.7519	10.3539	6.5222	9.19329	8.08279	9.76343
ENSGALG00000002314	0.0214958	0.0106924	0.669941	0.287175	0.470933	1.25987
ENSGALG00000002315	33.0002	26.877	31.5161	33.6717	31.0792	35.9571
ENSGALG00000002316	10.7144	10.3277	11.764	11.3086	10.6353	15.0903
ENSGALG00000002319	6.90565	3.23507	2.53353	3.3627	3.61437	4.40372
ENSGALG00000002321	111.902	107.517	97.4836	86.7241	79.4466	78.5725
ENSGALG00000002325	0.0268847	0.0263799	0.16491	0.146396	0.178419	0.21064
ENSGALG00000002326	7.10447	10.1412	8.34489	8.54837	11.7959	10.4615
ENSGALG00000002329	0.140431	0	0.146246	0.250119	0.537594	0.785576
ENSGALG00000002335	0.338529	0.245077	1.47385	0.530084	0.735178	0.651764
ENSGALG00000002336	5.04628	5.48506	8.2359	5.34532	6.64594	9.97977
ENSGALG00000002341	25.9983	25.6995	21.0493	28.1383	19.7078	20.3827
ENSGALG00000002345	15.089	12.598	17.2748	13.882	13.3926	21.9041
ENSGALG00000002346	2.68805	3.04577	2.36417	2.7005	2.16596	2.83164
ENSGALG00000002347	29.2172	28.9132	24.6749	33.777	23.7388	13.204
ENSGALG00000002350	0.213807	0.12749	0.2782	0.0360752	0.606517	0.103054
ENSGALG00000002354	12.0689	12.5081	12.2587	15.2493	12.365	12.7817
ENSGALG00000002356	3.10427	3.23345	6.71014	3.16051	5.09888	5.53184
ENSGALG00000002358	2.20199	5.21858	1.7692	2.44655	1.33006	1.50358
ENSGALG00000002362	123.028	131.679	101.722	151.387	75.7835	86.6872
ENSGALG00000002363	107.311	97.6659	118.234	88.9233	94.6749	107.526
ENSGALG00000002364	14.9793	16.4921	19.8868	12.8287	15.3666	16.7012
ENSGALG00000002370	0.0984761	0.0588401	1.08303	0.299412	0.406472	1.6608
ENSGALG00000002371	2.56835	3.45105	2.97234	2.22296	2.36753	3.19308
ENSGALG00000002374	1.81059	1.8571	1.94956	3.77477	2.99803	2.34145
ENSGALG00000002375	5.722	7.02924	6.45031	7.83075	6.67757	6.99968
ENSGALG00000002377	707.944	629.787	871.935	480.595	714.873	856.896
ENSGALG00000002379	59.3073	55.7733	53.1836	64.403	53.9769	52.709
ENSGALG00000002383	0.101618	0.067188	0.0694203	0.214184	0.4427	0.149858
ENSGALG00000002386	0.754737	0.576815	0.815074	0.897296	1.15828	0.874828
ENSGALG00000002388	24.5777	23.2299	22.3444	23.3589	23.0969	24.6753
ENSGALG00000002389	4.07213	3.58304	3.43426	5.55659	3.83635	5.14615
ENSGALG00000002390	0.119858	0.355868	0.573421	0.294897	0.624835	0.671549
ENSGALG00000002394	6.22078	5.14598	6.76523	6.34494	6.91702	7.63267
ENSGALG00000002397	1.88195	2.06973	2.77244	5.38139	2.17528	1.83733
ENSGALG00000002399	7.65764	8.92058	5.2903	9.6666	6.42317	5.84684
ENSGALG00000002403	5.0757	3.44873	7.42831	3.2376	6.78525	6.8353
ENSGALG00000002408	4.28184	4.73823	5.24448	4.51988	4.7184	6.53366
ENSGALG00000002412	14.1555	11.5327	14.4623	9.34141	10.8603	15.1382
ENSGALG00000002414	12.0911	10.8846	13.1402	10.2692	13.4237	11.2
ENSGALG00000002415	17.2229	14.953	22.9078	17.6689	21.3314	25.9426
ENSGALG00000002417	16.5557	13.5898	13.8446	16.99	10.8081	12.2009
ENSGALG00000002419	1.02586	1.09423	1.20132	0.842425	1.35471	1.03026
ENSGALG00000002421	146.896	96.6361	123.147	75.9507	115.881	112.046
ENSGALG00000002424	3.01815	2.79552	4.91529	2.71324	4.36222	5.761
ENSGALG00000002426	16.2031	10.9315	12.337	10.5982	10.4769	13.6119
ENSGALG00000002427	3.79999	1.88745	11.1485	3.99919	8.32871	11.1594
ENSGALG00000002428	22.7881	14.4149	59.9998	11.7181	59.0065	110.471
ENSGALG00000002430	42.7021	41.8474	43.7062	40.7245	50.759	43.2577
ENSGALG00000002431	12.8847	18.0906	17.4655	27.975	29.1578	19.1055
ENSGALG00000002437	2.10472	2.33122	3.0202	3.50541	2.65785	3.30215
ENSGALG00000002439	19.3292	11.808	7.42349	5.32141	11.3364	3.78868
ENSGALG00000002442	0.0872371	0.0287663	0.0898262	0.104838	0.159325	0.163194
ENSGALG00000002445	16.437	14.8068	17.6796	14.3576	19.7817	15.1553
ENSGALG00000002447	59.2811	64.7729	75.6491	61.1209	74.0396	74.1613
ENSGALG00000002448	120.715	118.116	133.58	103.005	107.766	117.356
ENSGALG00000002450	13.4599	10.5206	12.8688	9.33451	12.9615	11.7837
ENSGALG00000002452	10.3856	5.36949	16.7277	4.01586	14.5362	23.1054
ENSGALG00000002457	13.3575	10.3672	16.1427	9.94653	12.9229	17.2358
ENSGALG00000002458	14.7501	11.475	19.625	13.2768	20.1711	16.6596
ENSGALG00000002461	2.99914	1.99778	8.72296	4.8393	6.48781	7.67204
ENSGALG00000002463	9.36315	9.38195	9.62557	10.3667	9.87185	9.95928
ENSGALG00000002466	0.944764	0.615823	1.81337	0.968815	1.21276	2.02556
ENSGALG00000002467	19.7921	20.0328	16.799	20.6151	12.9489	17.3125
ENSGALG00000002469	15.4604	14.0927	16.2249	13.4712	15.3086	15.5181
ENSGALG00000002470	14.1986	8.3853	17.1618	9.27156	16.5611	17.9962
ENSGALG00000002473	2.4638	1.26007	2.71955	1.79593	2.55055	1.64224
ENSGALG00000002478	56.9465	55.9318	53.5057	51.729	52.2948	50.9832
ENSGALG00000002479	4.77911	5.73581	2.3509	5.17637	2.59981	2.82251
ENSGALG00000002484	9.84906	8.40934	19.0378	9.23775	16.1601	19.1537
ENSGALG00000002485	14.086	14.6898	13.5232	15.9714	15.3964	16.1102
ENSGALG00000002486	5.03465	5.26393	6.23068	5.23464	5.67167	5.68413
ENSGALG00000002487	12.481	11.5943	12.7868	12.7017	13.2444	11.5682
ENSGALG00000002488	121.474	107.709	129.657	109.426	116.921	126.444
ENSGALG00000002489	3.98748	4.70886	4.43114	3.42913	4.76046	3.7681
ENSGALG00000002490	84.3941	77.7347	73.148	74.1364	67.1099	67.6421
ENSGALG00000002492	3.81828	3.52113	7.22413	3.63726	4.8953	11.2996
ENSGALG00000002495	137.728	120.018	111.31	124.655	101.401	96.0064
ENSGALG00000002496	0.0910512	0.0459735	0.978239	0.200223	1.23772	1.47904
ENSGALG00000002497	10.101	10.3619	9.92446	9.97473	9.88017	9.95312
ENSGALG00000002499	7.84585	7.79553	8.70526	7.65339	7.24443	7.83669
ENSGALG00000002500	27.5511	29.4445	17.453	31.5556	13.2373	14.2579
ENSGALG00000002501	14.3335	14.6528	14.7719	12.8354	11.629	13.3427
ENSGALG00000002504	5.27345	4.94971	9.52823	3.76604	8.4808	16.1438
ENSGALG00000002506	21.2194	27.6455	29.8891	19.9489	21.912	27.5315
ENSGALG00000002507	0.0242647	0.171961	0.131695	0.191659	0.158842	0.137125
ENSGALG00000002510	14.8092	15.9017	18.0299	19.2781	20.9882	22.0481
ENSGALG00000002511	0.163849	0.0990475	1.04254	0.128348	0.950883	0.977145
ENSGALG00000002514	55.2353	58.9141	46.0622	51.0606	48.8057	38.1657
ENSGALG00000002515	6.99047	11.3511	4.9907	9.66996	8.50852	7.62238
ENSGALG00000002517	15.5372	19.2471	20.1142	29.8858	26.8871	26.1953
ENSGALG00000002519	7.99772	6.37919	6.46461	6.37114	5.36635	4.88878
ENSGALG00000002523	36.3508	32.1192	27.4068	32.2741	29.4386	30.2435
ENSGALG00000002524	29.466	26.0415	32.7989	22.602	24.8974	27.6675
ENSGALG00000002525	9.23943	10.2828	15.6737	6.15206	12.3264	9.24919
ENSGALG00000002527	16.121	18.1143	16.2118	10.4559	11.5282	15.7205
ENSGALG00000002528	65.8275	56.329	87.7812	44.962	92.1294	89.3135
ENSGALG00000002529	6.2636	5.16256	9.43907	6.68951	9.56538	9.82229
ENSGALG00000002531	42.1308	44.2557	40.1448	41.1264	38.5175	38.9168
ENSGALG00000002532	4.74645	4.39863	17.1748	9.1172	9.7468	21.1471
ENSGALG00000002536	39.7742	34.1593	29.6499	24.2763	27.3951	24.1323
ENSGALG00000002539	1.92616	1.92031	1.81856	1.7814	2.07602	1.58247
ENSGALG00000002542	10.6415	8.95579	10.0501	8.61083	7.37087	7.36432
ENSGALG00000002543	11.0352	12.226	15.2903	12.3099	21.7176	14.4674
ENSGALG00000002544	2.07189	2.50747	3.21399	3.60016	3.27358	2.85125
ENSGALG00000002546	77.1006	163.674	75.3368	98.6956	60.0111	78.5344
ENSGALG00000002548	41.9107	49.5841	41.3389	42.2717	35.6022	37.9827
ENSGALG00000002549	0.877666	0.255226	0.317971	0.136067	1.69076	0.59906
ENSGALG00000002551	1.39007	1.19996	1.05189	0.912082	1.64901	1.93861
ENSGALG00000002553	2.2446	2.98594	2.41291	3.23692	2.46491	2.07007
ENSGALG00000002554	5.47613	6.86151	6.38505	6.3274	6.11409	6.85835
ENSGALG00000002555	0.276177	0.0197631	1.45948	0.349138	2.86414	2.34052
ENSGALG00000002556	1.30417	1.00705	1.7782	1.31921	1.68258	2.10311
ENSGALG00000002557	4.68871	2.55146	6.09565	2.08679	4.64327	3.63805
ENSGALG00000002558	0.0249672	0.0308576	0.0485576	0.137648	0.177761	0.233643
ENSGALG00000002561	7.27365	7.57739	12.0169	7.13006	15.1169	13.1892
ENSGALG00000002562	4.80206	6.43032	4.89676	7.20572	5.62722	5.40284
ENSGALG00000002563	101.913	135.881	50.3127	125.489	48.7164	65.2803
ENSGALG00000002564	3.47541	2.58851	4.61188	2.35886	3.20746	4.65845
ENSGALG00000002569	290.841	264.152	222.409	237.579	189.611	223.348
ENSGALG00000002570	0.282185	0.196955	0.28955	0.485989	0.527775	0.188026
ENSGALG00000002576	1.87597	2.23093	1.66608	2.79266	3.32801	4.36112
ENSGALG00000002577	0.20246	0.273863	0.407814	0.395482	0.331235	0.613778
ENSGALG00000002578	16.7514	16.4097	15.9703	18.7513	13.0057	12.7415
ENSGALG00000002579	0.171811	0.168201	0.351241	0.69354	0.535034	0.616327
ENSGALG00000002581	9.65782	7.58123	11.1227	10.4304	10.5046	8.26301
ENSGALG00000002583	2.31523	1.91311	2.4047	3.17795	3.57078	3.76099
ENSGALG00000002587	16.1255	16.0516	23.3164	22.2026	18.3522	30.1245
ENSGALG00000002588	16.416	18.787	19.5164	16.2876	17.9951	19.6542
ENSGALG00000002591	89.8019	81.9657	77.9322	87.7939	78.8829	77.9097
ENSGALG00000002594	6.90009	8.82901	5.50638	6.63936	7.26853	7.38525
ENSGALG00000002595	298.439	176.738	239.148	187.085	255.524	218.785
ENSGALG00000002597	0.137383	0	0.03481	0.0944538	0.26254	0
ENSGALG00000002598	41.8889	48.9932	29.4377	44.6981	21.8471	27.5642
ENSGALG00000002599	7.82558	7.14485	8.79787	7.14157	8.3804	8.44925
ENSGALG00000002603	15.3425	13.4168	13.6386	15.2466	14.9854	14.1275
ENSGALG00000002605	56.2291	47.4423	46.7964	58.8909	62.2227	60.55
ENSGALG00000002606	174.56	127.091	73.4525	56.4173	66.4687	45.7338
ENSGALG00000002610	2.21408	1.43514	1.46539	1.63949	1.87291	1.59892
ENSGALG00000002612	16.59	17.0621	14.1733	16.0214	14.995	13.8677
ENSGALG00000002615	2.09427	1.6024	3.91169	3.59237	4.37579	4.68679
ENSGALG00000002616	20.7203	20.5235	25.6038	23.5355	24.1003	27.166
ENSGALG00000002618	2.75539	1.98477	4.72407	2.57533	3.33075	4.72485
ENSGALG00000002621	16.3802	13.5662	35.953	12.4949	20.7307	37.8517
ENSGALG00000002622	2.03345	2.31926	3.16317	3.28113	2.96147	3.08009
ENSGALG00000002623	2.14236	4.5095	2.49281	1.75896	2.60837	1.40722
ENSGALG00000002624	10.5422	11.1733	9.7511	10.7112	7.44443	9.77771
ENSGALG00000002630	2.64278	2.4785	2.52616	3.23871	2.42592	2.68399
ENSGALG00000002631	5.6876	4.9289	3.74381	4.0009	2.18264	2.71091
ENSGALG00000002632	5.2874	5.8632	5.40068	6.11576	5.53539	5.956
ENSGALG00000002634	13.899	13.5904	21.0348	16.2198	20.9605	19.5682
ENSGALG00000002637	169.527	203.807	56.0198	35.6176	52.4125	73.9166
ENSGALG00000002638	1.83097	0.900751	1.25221	2.12628	1.59355	2.59735
ENSGALG00000002639	8.79053	9.96356	7.95388	10.2875	9.4996	7.83424
ENSGALG00000002643	0.931131	1.29828	1.60309	1.51179	3.00461	4.7173
ENSGALG00000002644	293.049	253.844	230.196	260.38	240.733	291.217
ENSGALG00000002645	1.07932	0.601786	7.65835	1.24001	4.28503	9.07186
ENSGALG00000002646	3.09381	2.55932	6.78762	2.43525	3.47464	5.83417
ENSGALG00000002647	0.955778	0.904286	11.1985	2.24341	6.10039	13.4249
ENSGALG00000002648	6.30831	5.68212	6.33692	6.80674	6.96352	5.32687
ENSGALG00000002649	12.6644	14.05	15.4431	15.1323	14.3066	14.6425
ENSGALG00000002651	24.2554	30.0469	23.265	29.5861	23.9373	21.6498
ENSGALG00000002653	5.12702	5.11386	4.07528	4.93393	5.32609	4.85215
ENSGALG00000002655	19.0509	22.6678	20.0717	12.3633	18.6285	16.0132
ENSGALG00000002656	18.2704	22.0382	22.0564	17.0212	20.4997	19.6416
ENSGALG00000002659	34.865	33.3622	37.592	32.2007	33.9425	35.7202
ENSGALG00000002661	235.349	241.893	222.388	217.286	206.723	204.92
ENSGALG00000002663	3.09589	3.01728	3.20447	1.6769	3.75685	3.12722
ENSGALG00000002666	16.4946	15.5572	14.9429	14.6277	12.806	12.4597
ENSGALG00000002667	14.5967	21.4298	18.3106	17.7256	26.3819	24.585
ENSGALG00000002671	0.724911	1.15986	5.89937	1.04436	4.02704	3.37044
ENSGALG00000002675	8.22435	6.42556	5.15448	5.66612	3.53639	3.59398
ENSGALG00000002678	4.46615	5.47244	4.33165	3.23864	4.5338	4.80549
ENSGALG00000002679	1.54723	0.988504	2.12983	1.29387	2.39772	1.63163
ENSGALG00000002682	7.07782	9.60556	7.40477	7.6713	8.97808	10.1195
ENSGALG00000002683	32.9883	29.1689	48.2328	33.3658	50.4967	33.4089
ENSGALG00000002686	9.94211	8.87088	10.1484	9.44061	11.3791	12.6167
ENSGALG00000002688	1.30444	0.95637	0.840765	1.57311	0.392656	1.56005
ENSGALG00000002689	16.7092	16.1265	27.049	20.9415	21.1534	39.1707
ENSGALG00000002690	6.51817	6.46204	7.50283	6.24847	9.30286	10.9531
ENSGALG00000002693	10.6353	11.2595	12.7431	12.3757	11.6669	12.6791
ENSGALG00000002695	10.6581	9.87713	12.3481	12.1577	14.8381	12.4619
ENSGALG00000002699	11.8429	15.4959	13.7525	12.0286	14.6363	12.545
ENSGALG00000002701	40.5162	34.23	46.7762	33.587	48.8071	51.9537
ENSGALG00000002703	41.1001	37.5393	44.1138	44.2681	48.3971	46.5996
ENSGALG00000002705	39.3171	43.0198	46.1387	43.7194	43.6998	45.5442
ENSGALG00000002706	3.46531	3.26436	3.21323	1.80065	3.95722	3.16969
ENSGALG00000002707	2.13047	2.18697	1.82676	2.33751	3.05236	1.72474
ENSGALG00000002708	14.355	10.8544	11.3538	15.3626	15.7812	11.265
ENSGALG00000002709	37.9279	42.1417	31.9501	35.0241	27.031	32.015
ENSGALG00000002710	6.01344	4.8518	12.28	6.39322	12.2884	18.2559
ENSGALG00000002714	0.476152	0.357678	0.60273	0.939477	0.929485	1.3738
ENSGALG00000002719	22.5051	23.7302	25.797	22.2521	25.4317	23.8749
ENSGALG00000002722	8.58147	4.88281	5.04498	7.59585	18.4644	12.2702
ENSGALG00000002723	3.80372	4.35007	3.95991	4.45556	4.06087	3.12342
ENSGALG00000002725	9.08733	11.1535	7.50189	11.488	6.75244	7.85369
ENSGALG00000002726	26.2824	37.815	29.2409	22.3209	26.2568	22.9552
ENSGALG00000002728	0.433947	0.573152	0.248606	0.307147	0.369954	0.435325
ENSGALG00000002729	4.194	3.61611	3.15014	2.88584	2.84953	2.66468
ENSGALG00000002734	37.0883	35.077	65.377	34.7559	49.3408	63.1319
ENSGALG00000002735	16.0572	12.0692	19.1615	13.9472	19.2439	20.5692
ENSGALG00000002739	16.6305	16.4982	15.7673	18.1278	15.3896	14.1604
ENSGALG00000002742	0.636417	0.736987	1.73754	1.05671	2.6313	3.54198
ENSGALG00000002744	0.0728404	0.0716473	0.503855	0.221403	0.525269	1.40882
ENSGALG00000002750	39.6352	44.6519	35.1556	35.0532	31.3356	31.129
ENSGALG00000002759	10.1903	20.1529	12.6576	3.72287	12.1201	4.71187
ENSGALG00000002761	8.44663	9.46884	8.33623	9.09914	9.71409	9.55664
ENSGALG00000002762	7.534	7.05719	8.90981	5.78799	7.13772	7.18073
ENSGALG00000002763	34.1101	49.6931	40.0769	62.5626	44.5871	53.1406
ENSGALG00000002764	95.4614	102.742	73.481	97.0239	69.4478	64.1504
ENSGALG00000002765	17.7962	17.3749	21.2947	18.9716	21.4563	25.4302
ENSGALG00000002766	0.830523	0.294191	0.176641	0.0959031	0.139905	0.0713867
ENSGALG00000002769	6.70444	5.51378	12.8227	11.9447	16.5534	15.3065
ENSGALG00000002771	107.727	82.7147	61.4844	108.2	82.7261	77.1813
ENSGALG00000002773	36.5101	39.1417	36.9337	38.4162	35.9845	39.6375
ENSGALG00000002774	159.457	128.922	166.893	145.901	171.735	177.937
ENSGALG00000002775	2.44753	1.43468	4.00823	1.07766	2.08694	3.60047
ENSGALG00000002781	5.66224	5.92454	17.0747	7.23285	10.9092	21.7829
ENSGALG00000002783	10.7499	10.4217	16.5718	11.3931	18.9456	25.7202
ENSGALG00000002784	11.778	10.7187	13.6186	14.8535	14.3579	13.9381
ENSGALG00000002786	0.556891	0.683715	0.748358	0.979848	1.30083	1.31759
ENSGALG00000002789	1.54248	1.31189	0.891665	1.94965	0.994324	1.40327
ENSGALG00000002790	3.22649	4.60054	3.53009	5.06072	3.97519	4.11621
ENSGALG00000002797	46.4958	49.2417	38.0851	43.3158	38.0905	35.2886
ENSGALG00000002798	4.05195	3.55503	5.45674	5.48507	6.46074	7.15357
ENSGALG00000002800	0.49053	0.471932	0.481608	0.488518	0.824821	0.345266
ENSGALG00000002802	1.63646	1.61016	1.36762	2.06099	1.34989	1.39183
ENSGALG00000002803	33.3537	34.1145	44.5735	33.8671	43.1706	39.4789
ENSGALG00000002804	0.994893	0.679497	3.17347	1.2043	1.7424	4.54266
ENSGALG00000002813	1285.11	1258.78	1156.81	1395.15	1173.19	1399.16
ENSGALG00000002816	5.03836	4.07504	8.19779	5.77671	8.68314	10.0422
ENSGALG00000002818	46.7761	37.5475	56.7138	29.728	50.2971	51.4563
ENSGALG00000002820	7.98617	6.86623	6.96653	10.4026	5.98756	10.6412
ENSGALG00000002827	15.3491	14.1038	22.5651	15.9157	17.0111	22.2779
ENSGALG00000002830	14.4786	18.3682	19.8847	15.7747	13.9027	19.8127
ENSGALG00000002831	18.6471	16.8783	13.8022	15.857	11.9148	16.2793
ENSGALG00000002832	16.3249	13.89	15.9342	17.0191	20.9121	18.2251
ENSGALG00000002836	10.8895	10.3181	12.0684	9.51588	10.5409	10.8135
ENSGALG00000002837	513.862	502.284	445.05	584.741	519.472	568.11
ENSGALG00000002840	0.893058	1.02205	0.85675	1.29177	1.0169	1.7439
ENSGALG00000002841	8.37404	8.32821	18.3101	9.82084	14.103	22.1827
ENSGALG00000002843	5.93073	4.55321	9.71616	5.4754	7.7403	11.4849
ENSGALG00000002845	0.247182	0.249947	0.742115	0.162641	0.331936	0.637402
ENSGALG00000002846	12.316	12.5591	17.4772	17.0758	15.5197	28.0162
ENSGALG00000002848	0.0198686	0	0.0816401	0	0	0.688392
ENSGALG00000002849	9.70901	11.6303	10.6467	19.2179	16.5461	13.0003
ENSGALG00000002850	5.8614	5.36279	6.06705	5.59137	6.19237	5.87971
ENSGALG00000002853	22.0519	19.6826	19.172	19.9718	21.7775	19.463
ENSGALG00000002854	7.91584	6.86237	4.02701	3.70161	5.0425	3.884
ENSGALG00000002855	1.83106	1.53969	1.33892	1.55107	1.37284	1.08992
ENSGALG00000002856	17.929	14.9169	20.7252	18.3963	22.3279	27.9693
ENSGALG00000002861	7.31899	7.34377	11.7097	9.18213	11.3627	14.9338
ENSGALG00000002863	64.2976	63.3168	58.375	63.1103	54.6033	60.6733
ENSGALG00000002864	0.0941881	0.18977	0.0307605	0.246379	0.175961	0.0965162
ENSGALG00000002866	6.23426	6.86794	7.87765	7.0925	9.14347	7.45071
ENSGALG00000002868	417.511	338.728	367.06	383.899	414.863	413.379
ENSGALG00000002870	9.90917	12.1724	11.3316	11.9254	11.0999	13.6606
ENSGALG00000002877	3.29778	3.26974	3.84759	4.55854	3.98916	3.65188
ENSGALG00000002878	4.14515	3.40888	7.44256	3.56291	8.47479	5.86039
ENSGALG00000002880	14.3052	13.9861	11.5663	16.5422	12.2821	16.1414
ENSGALG00000002881	18.5294	17.7869	18.7003	15.6795	17.194	16.9194
ENSGALG00000002882	10.6694	8.60837	9.8096	11.5137	9.44669	9.37746
ENSGALG00000002883	2.58057	2.94667	5.47157	3.73468	5.2559	6.75066
ENSGALG00000002886	0	0	0.583805	0.0294098	0.87601	0.673049
ENSGALG00000002888	3.49752	1.46704	2.52462	2.27017	3.47716	2.54421
ENSGALG00000002891	70.2154	67.6364	50.2315	64.4379	61.1146	57.226
ENSGALG00000002892	2.19526	1.6128	2.50869	3.29494	2.69635	3.90301
ENSGALG00000002893	9.02266	7.88013	5.63672	7.91732	9.56399	9.78893
ENSGALG00000002897	0.318182	0.31372	0.195215	0.528871	0.504599	0.225066
ENSGALG00000002899	21.5281	26.7686	20.6636	14.712	20.3827	20.1799
ENSGALG00000002900	1.57814	0.71799	2.25435	3.12743	1.17222	3.75568
ENSGALG00000002904	10.3287	11.1109	14.1414	10.0597	12.101	13.3615
ENSGALG00000002906	46.1204	46.2268	43.3362	49.0001	43.2414	41.7241
ENSGALG00000002907	0.102225	0.181445	0.190142	0.201509	0.248268	0.0511099
ENSGALG00000002908	5.98721	5.45987	9.69585	6.96453	9.45797	10.7427
ENSGALG00000002911	4.23305	2.82424	4.47476	7.65936	6.14299	4.35508
ENSGALG00000002913	38.3278	40.8666	31.79	43.1005	35.184	35.2586
ENSGALG00000002919	10.5248	11.0588	13.7936	11.5463	14.0337	13.8811
ENSGALG00000002921	13.7833	13.2421	18.9864	13.377	16.2691	16.5836
ENSGALG00000002922	25.3226	33.5947	31.0281	28.76	23.7275	31.008
ENSGALG00000002925	81.0015	69.7804	60.5796	72.0097	52.0374	56.4995
ENSGALG00000002929	33.5828	28.3365	37.0841	22.5843	30.3991	33.2783
ENSGALG00000002931	0	0	0.227218	0.39666	0	0.246085
ENSGALG00000002932	521.692	504.758	380.882	546.885	410.326	425.824
ENSGALG00000002937	63.8304	61.6378	59.727	56.7658	52.6311	57.04
ENSGALG00000002942	8.87744	9.20714	8.95662	6.51673	9.45447	7.72788
ENSGALG00000002943	34.4598	37.3595	36.5262	30.5884	31.0982	32.8918
ENSGALG00000002944	0.284832	0.197447	0.488565	0.494855	0.547822	0.750385
ENSGALG00000002945	2.07469	2.03626	1.7357	2.32813	1.87172	2.04096
ENSGALG00000002952	2.26512	1.93922	2.14225	2.69297	2.49526	2.88183
ENSGALG00000002954	6.58699	6.7029	8.63132	7.74611	8.83993	10.5922
ENSGALG00000002955	15.0595	14.7575	11.7459	15.0181	7.56039	8.73943
ENSGALG00000002957	0.195216	0.0802563	0.0495592	0.209718	0.0893971	0.0538938
ENSGALG00000002958	3.0321	2.56214	4.38412	2.2738	3.13109	5.26704
ENSGALG00000002959	9.09391	7.62973	11.4973	8.0493	11.6267	11.0416
ENSGALG00000002960	0.0378774	0.29727	0.0380905	0.280829	0.0417409	0.125548
ENSGALG00000002963	15.6504	23.485	19.5688	18.5996	13.8142	19.7036
ENSGALG00000002964	9.22339	8.22021	10.9607	10.3389	9.82567	12.789
ENSGALG00000002967	9.01424	9.7121	8.83487	8.75526	9.1024	8.54375
ENSGALG00000002968	2.50253	2.32381	3.18511	3.20164	3.34813	4.48297
ENSGALG00000002969	10.2201	11.6116	11.2711	10.1009	12.2715	10.6621
ENSGALG00000002971	6.80964	8.15954	9.02882	7.03712	6.67302	6.35551
ENSGALG00000002973	18.9017	17.692	19.815	17.6202	19.208	20.1895
ENSGALG00000002974	0.0795247	0.0645448	0.101499	0.0701533	0.0653455	0.0866671
ENSGALG00000002980	2.26878	2.7375	2.05953	1.87387	1.60598	2.37457
ENSGALG00000002981	5.04578	4.91801	6.21492	5.04994	4.96546	5.44995
ENSGALG00000002982	1.05397	0.585023	0.803531	2.21963	3.40921	1.89254
ENSGALG00000002984	22.5818	17.7822	25.1947	21.6802	31.6612	24.7846
ENSGALG00000002985	15.2509	13.0339	14.5964	17.5365	16.6399	24.49
ENSGALG00000002987	13.3504	9.04123	8.19789	8.61794	15.3356	11.6737
ENSGALG00000002988	0.646204	0.492866	1.17248	1.9663	1.06866	0.971427
ENSGALG00000002990	230.578	199.066	219.257	209.904	207.49	204.491
ENSGALG00000002992	0.87056	0.997435	1.11608	0.632388	0.52451	0.74609
ENSGALG00000002993	55.1731	42.0807	80.8185	38.908	69.0225	64.8955
ENSGALG00000003003	0.294341	0.222017	0.469422	0.388288	0.402347	0.164933
ENSGALG00000003010	15.8309	13.0396	15.6616	14.535	15.713	17.9348
ENSGALG00000003011	32.3094	19.8445	9.64748	32.5086	11.9529	10.4192
ENSGALG00000003013	0.22719	0.0983588	0.313788	0.0868803	0.426119	0.437012
ENSGALG00000003015	141.458	109.478	93.7361	101.109	64.8474	92.7076
ENSGALG00000003016	0.173102	0.04334	0.267305	0.0771154	0.206267	0.487364
ENSGALG00000003021	1.30973	1.29091	1.09776	1.62702	1.69987	1.52963
ENSGALG00000003022	1.12371	1.04276	0.795956	0.954897	1.49765	1.35399
ENSGALG00000003024	10.219	9.74901	14.7275	9.07705	12.9839	15.2998
ENSGALG00000003025	0.481559	0.478067	0.681353	0.350613	0.336694	0.44017
ENSGALG00000003026	7.99758	8.27417	7.7522	6.28598	9.39772	7.157
ENSGALG00000003029	12.6828	12.4151	16.2208	8.3763	15.0158	14.2902
ENSGALG00000003031	11.9596	9.71202	17.988	10.0089	13.2659	21.5683
ENSGALG00000003033	5.25042	6.99462	6.88518	5.79783	6.28483	7.38852
ENSGALG00000003034	0.809151	0	0.342285	0.428417	0.179318	0
ENSGALG00000003035	2.18541	2.22651	4.47576	2.01607	3.34702	5.12603
ENSGALG00000003039	29.7777	33.3976	16.557	29.017	16.1565	17.1529
ENSGALG00000003042	13.6418	10.9836	16.9821	16.4663	16.6543	13.9517
ENSGALG00000003045	15.3773	18.9747	13.9922	18.7265	17.6651	17.1413
ENSGALG00000003046	94.0444	93.1892	79.3641	92.9536	73.4647	73.9579
ENSGALG00000003047	11.1319	10.3081	14.7182	7.59953	12.831	8.23748
ENSGALG00000003052	61.2742	64.9091	78.5313	51.6832	69.7366	75.1361
ENSGALG00000003053	127.132	134.958	185.964	134.482	159.498	157.49
ENSGALG00000003058	0.488977	0.611661	1.38707	0.758956	1.88855	1.80507
ENSGALG00000003059	8.68093	10.6646	11.9862	11.1878	10.8122	10.5559
ENSGALG00000003063	2.9569	2.46249	2.50047	3.21098	4.01727	2.31993
ENSGALG00000003065	3.43695	3.4579	3.79035	4.72039	3.95495	4.81725
ENSGALG00000003067	48.3404	44.4563	34.7868	42.3707	40.5544	45.4549
ENSGALG00000003068	7.04085	7.30026	10.0752	8.88448	9.21477	12.1565
ENSGALG00000003071	7.1273	8.95392	8.54856	9.95262	6.14448	8.22533
ENSGALG00000003072	42.4617	37.2066	43.3276	38.3894	41.4126	43.4275
ENSGALG00000003073	0.862761	1.01921	0.67204	0.946466	1.03428	0.890723
ENSGALG00000003074	12.7396	14.6941	13.8748	10.6685	12.3446	14.9548
ENSGALG00000003076	0.283202	0.28099	0.271629	0.331719	0.071847	0.268876
ENSGALG00000003078	100.423	64.5658	49.0757	70.1965	60.6188	58.304
ENSGALG00000003079	25.7373	22.6301	27.9887	26.1809	28.396	31.6917
ENSGALG00000003081	20.1897	16.8788	28.0045	13.2314	26.6896	27.8206
ENSGALG00000003082	11.4707	12.0168	10.4538	12.8095	10.8767	10.454
ENSGALG00000003084	39.9141	36.7743	30.6002	41.212	32.4911	35.1303
ENSGALG00000003085	77.5091	83.43	78.5293	58.447	69.3644	95.1845
ENSGALG00000003086	12.1442	11.565	11.356	12.8006	11.286	13.3636
ENSGALG00000003091	12.806	11.5309	12.8636	11.9388	12.4402	13.5355
ENSGALG00000003092	56.7469	56.7389	60.4352	48.2049	52.4962	58.693
ENSGALG00000003096	2.57719	3.29172	4.65103	3.25662	3.33624	7.54696
ENSGALG00000003099	6.33209	4.66294	7.34815	4.33256	8.06173	7.81596
ENSGALG00000003101	16.9179	15.9515	21.84	16.3383	20.0488	23.2295
ENSGALG00000003103	2.06962	1.27332	1.77542	2.39728	2.23729	1.20026
ENSGALG00000003106	51.6419	36.3469	62.1456	43.3232	53.5326	41.3195
ENSGALG00000003107	14.0201	15.2338	15.4261	15.8464	12.7329	15.1473
ENSGALG00000003108	17.2926	17.7162	18.9214	17.0137	16.7258	17.7315
ENSGALG00000003111	8.35062	7.55278	10.6252	8.88439	11.687	10.4141
ENSGALG00000003113	4.95926	6.51728	3.44501	6.59348	3.82558	4.67231
ENSGALG00000003114	17.0735	14.0838	16.6686	15.4433	13.9304	13.1371
ENSGALG00000003118	6.20217	10.1052	6.49417	8.15897	6.43037	7.55628
ENSGALG00000003120	21.4572	18.6541	16.6403	18.076	14.1707	13.391
ENSGALG00000003122	14.6761	15.7608	36.1175	34.7437	21.5329	46.7105
ENSGALG00000003123	6.26861	9.23857	4.45189	7.16546	4.78419	4.63132
ENSGALG00000003124	3.69671	4.38636	4.15288	3.86352	4.46026	3.13827
ENSGALG00000003126	0.627114	0.632215	2.20727	0.502114	0.997451	2.63244
ENSGALG00000003128	32.3385	31.4563	24.1115	25.7725	21.0085	18.9663
ENSGALG00000003129	8.35178	8.18148	11.6235	8.45053	11.2223	10.7026
ENSGALG00000003130	14.8566	14.6965	17.1788	14.4229	16.3292	19.4217
ENSGALG00000003131	4.77728	5.53315	6.57527	2.93586	5.20064	5.3254
ENSGALG00000003135	3.66453	3.45493	7.9857	2.90561	6.02645	8.16923
ENSGALG00000003136	1.17671	1.18857	3.6964	1.05202	4.48614	3.40546
ENSGALG00000003137	2.98256	8.17114	4.33095	2.56845	2.1318	1.83477
ENSGALG00000003138	0.191233	0.038181	0.270243	0.545822	0.295505	1.92753
ENSGALG00000003142	0.29621	0.0582573	0.0606828	0.0536763	0	0
ENSGALG00000003143	20.8358	17.9416	23.2545	17.8396	22.3513	21.631
ENSGALG00000003144	35.5559	30.0654	29.6454	22.4637	24.1057	19.2274
ENSGALG00000003146	9.69036	6.66677	8.51718	9.29949	5.12134	9.04429
ENSGALG00000003147	36.2598	32.9179	34.8893	29.6781	32.3758	37.9944
ENSGALG00000003148	2.26153	1.94234	5.16109	2.04647	3.59417	6.1033
ENSGALG00000003149	3.19597	3.7794	2.33952	4.03174	2.5495	1.97654
ENSGALG00000003153	76.8561	79.2686	63.7716	74.1676	62.8257	67.2032
ENSGALG00000003154	8.80944	11.6613	12.6687	13.4625	9.66768	9.79438
ENSGALG00000003155	1.30019	0.929928	1.05645	1.8296	1.37493	2.26782
ENSGALG00000003160	10.1896	9.62649	17.1911	8.39028	12.0299	21.0214
ENSGALG00000003161	7.58689	6.89784	9.21579	7.81228	8.64498	8.58443
ENSGALG00000003162	19.1486	15.3251	24.6787	19.7397	19.0852	21.9161
ENSGALG00000003163	38.9911	25.7262	10.9137	15.3561	8.22265	6.21973
ENSGALG00000003164	0.051569	0.363255	0.988382	0.228493	0.846232	0.811134
ENSGALG00000003165	15.0568	15.3097	13.2029	12.1576	12.7188	12.0412
ENSGALG00000003168	4.23082	4.03002	10.6962	3.23822	10.4887	12.2686
ENSGALG00000003169	58.2612	69.9259	55.1045	53.1131	53.4442	54.1574
ENSGALG00000003172	6.86163	7.97884	10.6357	6.26358	7.22379	9.44104
ENSGALG00000003174	0.111135	0.0327909	0.0669696	0.126702	0.153392	0.0182542
ENSGALG00000003175	2.53057	1.11159	5.26586	2.66666	4.78903	10.5572
ENSGALG00000003176	0.165729	0.0671679	0.288826	0.0288675	0.218399	0.60248
ENSGALG00000003179	1.21434	1.37195	0.0401321	0.672021	0.662169	0.425405
ENSGALG00000003181	16.2883	12.7276	19.4289	15.9405	18.865	21.1727
ENSGALG00000003183	8.70979	8.73528	9.30421	9.58257	10.067	9.97649
ENSGALG00000003185	56.4766	46.6013	53.3004	49.3168	52.2406	53.8912
ENSGALG00000003189	42.4061	38.2098	45.2619	44.1983	48.2338	50.0309
ENSGALG00000003193	0.0601315	0.180781	1.06452	0.219486	0.593101	1.3411
ENSGALG00000003194	20.7893	22.4183	27.7546	18.9583	23.6247	24.6222
ENSGALG00000003195	3.22945	2.96818	2.77095	2.61539	2.94697	2.605
ENSGALG00000003196	5.85844	4.04263	5.54	11.0406	9.93594	13.7613
ENSGALG00000003197	647.928	605.665	558.162	591.81	627.074	729.274
ENSGALG00000003199	40.074	45.9429	37.6459	52.4572	33.2346	34.0014
ENSGALG00000003201	7.13375	5.78129	6.18332	8.17516	7.84281	8.80043
ENSGALG00000003203	3.49191	4.81254	2.46352	7.48136	4.18493	3.63327
ENSGALG00000003204	19.4493	20.4465	33.258	22.2158	31.4113	31.5392
ENSGALG00000003205	90.318	79.8006	106.39	83.3485	96.945	110.731
ENSGALG00000003206	4.19457	3.70477	4.0783	4.03645	3.54625	3.95585
ENSGALG00000003208	21.1033	17.4018	26.0776	21.5582	26.2107	26.3581
ENSGALG00000003211	20.1094	19.2354	25.8358	21.5024	22.223	28.149
ENSGALG00000003212	0.280904	0.355497	0.397702	0.968541	0.640364	0.578863
ENSGALG00000003213	0.689041	0.534474	0.457269	1.25066	0.479329	1.90126
ENSGALG00000003217	2.07584	1.29927	8.38075	3.72594	7.28219	18.4917
ENSGALG00000003219	12.7535	11.9066	16.3152	15.4333	17.5815	15.9427
ENSGALG00000003220	21.6266	24.5497	29.1754	23.413	25.4291	28.696
ENSGALG00000003221	26.9861	23.8215	22.7003	21.0027	26.4274	21.7966
ENSGALG00000003226	8.85843	6.62235	8.35433	7.41969	9.42791	10.1766
ENSGALG00000003227	29.8262	29.5263	53.6379	9.04142	43.5401	15.912
ENSGALG00000003228	29.4578	17.1506	40.9068	22.7008	40.3331	44.7155
ENSGALG00000003233	62.0711	32.922	28.7849	36.2062	29.4176	32.491
ENSGALG00000003235	5.86352	7.00695	4.87901	5.10683	5.40778	5.11863
ENSGALG00000003238	24.8385	31.458	24.8691	25.2186	22.3876	20.6366
ENSGALG00000003241	4.90149	3.33264	3.76107	5.01353	5.13113	5.66232
ENSGALG00000003242	551.584	220.906	109.942	181.32	107.215	86.7401
ENSGALG00000003243	6.00732	6.93014	7.50134	6.15295	7.23853	7.67882
ENSGALG00000003245	37.5539	23.1955	22.2485	26.6529	24.5194	23.4771
ENSGALG00000003247	19.3752	21.1326	23.6735	23.2623	18.2528	17.2033
ENSGALG00000003248	35.6337	35.3759	28.2385	32.4495	28.6888	27.5656
ENSGALG00000003249	30.8945	29.1081	32.8063	28.0299	29.0348	29.1467
ENSGALG00000003250	17.1928	15.3076	16.1548	14.9241	14.7061	15.0791
ENSGALG00000003254	17.6919	15.4289	21.313	19.7073	21.3658	23.8482
ENSGALG00000003256	27.9233	21.3366	40.2955	24.8062	35.259	37.9968
ENSGALG00000003258	1.44126	1.36277	1.87272	1.46173	1.97741	2.05864
ENSGALG00000003259	11.3801	10.1477	10.6442	11.2935	9.97539	13.4957
ENSGALG00000003260	13.384	13.4245	22.7484	13.0702	19.1456	24.8359
ENSGALG00000003261	154.595	199.438	189.072	161.001	173.585	154.017
ENSGALG00000003265	65.6987	56.5658	52.4324	62.4093	42.5792	50.9967
ENSGALG00000003267	31.0217	36.7866	33.8302	37.119	40.9914	40.4221
ENSGALG00000003272	29.435	30.3683	21.0104	27.9509	22.2095	20.8421
ENSGALG00000003273	10.1453	8.26543	14.5176	10.1895	12.3934	16.1558
ENSGALG00000003281	17.7488	17.0205	18.4883	22.3638	22.717	17.8681
ENSGALG00000003282	18.0824	21.4899	21.3872	20.4025	22.3989	22.9976
ENSGALG00000003283	1.2238	0.933566	0.833168	1.45791	0.731202	0.792643
ENSGALG00000003284	19.4636	18.9255	23.1623	20.6495	21.7954	24.1889
ENSGALG00000003285	0.172232	0.187265	0.135894	0.148339	0.167745	0.191327
ENSGALG00000003286	0.284287	0.129828	0.208435	0.534748	1.67751	0.757269
ENSGALG00000003287	13.1793	10.3298	12.9715	11.0813	13.0182	12.606
ENSGALG00000003288	15.0686	16.1096	19.8725	15.1749	13.5193	18.2102
ENSGALG00000003293	32.0061	28.7499	36.5236	24.296	37.1842	33.3577
ENSGALG00000003294	2.69487	2.46734	3.33953	1.79311	2.86354	2.95865
ENSGALG00000003295	2.90304	2.71449	2.26488	1.79848	2.68392	2.5288
ENSGALG00000003297	24.1541	25.6649	23.7175	23.633	23.569	23.1711
ENSGALG00000003298	6.41125	6.06319	5.36671	5.58315	5.19132	4.94297
ENSGALG00000003299	9.19284	9.70521	13.2365	7.00792	10.2307	11.4503
ENSGALG00000003301	1.71363	3.33219	8.74091	3.99727	1.73957	8.97555
ENSGALG00000003304	6.94311	8.44644	9.3884	7.47347	9.20118	9.55803
ENSGALG00000003307	201.247	182.024	150.759	182.34	130.712	138.025
ENSGALG00000003308	17.0053	17.3995	20.2844	18.2501	21.8626	24.9253
ENSGALG00000003310	0.0437722	0.198063	0.0923044	0.019515	0.0238956	0.0244193
ENSGALG00000003313	3.67484	3.84568	3.53723	6.47198	5.35533	5.09707
ENSGALG00000003314	16.9712	17.6857	16.3779	13.2991	14.6873	14.618
ENSGALG00000003318	4.68862	4.4241	6.79174	5.79221	7.17257	6.41157
ENSGALG00000003319	0.973467	0.558029	0.596901	1.44392	1.72077	1.65466
ENSGALG00000003321	19.0053	17.9623	18.5515	21.0931	22.1834	19.1759
ENSGALG00000003322	10.0368	9.44082	15.5425	5.99041	13.3035	9.93495
ENSGALG00000003323	2.90152	2.43344	5.80493	5.69455	2.91408	3.55488
ENSGALG00000003324	5.82814	5.78337	5.45384	10.8868	3.50269	4.46168
ENSGALG00000003325	8.75149	9.25534	17.2055	9.30944	12.2459	22.9059
ENSGALG00000003326	3.94498	4.10539	3.87759	4.74798	3.71037	3.47531
ENSGALG00000003329	14.0414	13.3846	11.1205	15.0662	12.1887	14.0019
ENSGALG00000003331	29.3306	26.5056	44.3426	26.8006	35.78	49.6598
ENSGALG00000003333	6.51831	5.58594	6.50519	6.74244	7.66051	8.44747
ENSGALG00000003336	0.898676	0.746192	0.848822	0.4954	1.06352	1.53513
ENSGALG00000003337	93.623	85.5723	90.3203	80.8189	93.0222	113.802
ENSGALG00000003339	5.26622	6.68287	6.97528	5.20991	6.12352	7.31796
ENSGALG00000003340	4.29329	4.25898	4.85343	5.49793	5.85953	6.74274
ENSGALG00000003344	115.01	106.767	155.262	97.2877	141.045	140.124
ENSGALG00000003345	2.5819	2.10312	2.78962	2.31641	2.14114	1.6974
ENSGALG00000003348	76.116	69.0752	80.094	77.3615	74.6358	70.359
ENSGALG00000003349	2.51647	2.60853	7.19561	4.48156	6.33136	11.475
ENSGALG00000003353	16.2383	15.4894	11.573	12.7856	10.4235	11.4694
ENSGALG00000003354	0.382373	0.264603	0.332126	0.291173	0.887712	0.483767
ENSGALG00000003355	22.1329	20.3571	21.1746	20.8016	20.8532	21.3699
ENSGALG00000003356	10.9868	9.47241	12.8351	11.6779	12.7655	15.1026
ENSGALG00000003357	20.9286	20.2907	18.6666	21.4468	21.2245	23.9853
ENSGALG00000003358	29.695	30.4242	33.5405	27.918	24.8285	26.9726
ENSGALG00000003359	111.187	80.1621	148.428	95.3493	155.762	139.97
ENSGALG00000003360	2.37122	1.34989	2.11362	1.66027	2.02667	1.85943
ENSGALG00000003361	0.197409	0.21069	0.455296	0.298002	0.334122	0.625521
ENSGALG00000003362	11.4684	11.3496	10.3749	13.5832	11.6667	13.5558
ENSGALG00000003365	5.16331	6.28481	4.77654	5.1698	5.16046	5.54517
ENSGALG00000003369	13.2722	12.8508	18.1226	14.7334	12.4954	13.6712
ENSGALG00000003370	21.5009	19.2707	38.6979	18.0059	36.8439	53.7494
ENSGALG00000003373	18.6457	15.8164	18.9337	15.0592	16.4105	20.5232
ENSGALG00000003374	0.297042	0.124887	2.47015	1.14057	1.77436	4.30911
ENSGALG00000003377	6.90106	6.42228	6.32367	7.33183	7.16663	7.48486
ENSGALG00000003378	3.08549	2.48646	1.86632	2.26377	2.06627	2.19981
ENSGALG00000003381	5.19842	4.82319	7.1827	3.49429	7.15101	5.33261
ENSGALG00000003383	23.0084	21.751	36.3743	22.3109	32.1167	37.7935
ENSGALG00000003385	25.1287	19.6179	23.1127	20.0855	23.7442	25.7068
ENSGALG00000003387	5.4564	6.94895	11.7496	3.35589	6.42375	7.3711
ENSGALG00000003391	7.46425	6.94864	10.5318	9.31932	12.0229	10.3699
ENSGALG00000003392	18.0543	16.5972	26.0399	14.3069	23.5276	22.3931
ENSGALG00000003396	11.0439	12.8377	9.78931	7.84147	10.9103	9.01024
ENSGALG00000003397	19.4072	18.4179	22.567	16.309	21.9207	19.0087
ENSGALG00000003398	20.904	17.7466	27.6004	17.9385	23.4653	27.6992
ENSGALG00000003400	34.3677	35.0557	34.3403	30.1642	33.0318	37.1629
ENSGALG00000003403	0.422871	0.351692	5.45285	1.57279	2.99763	8.10021
ENSGALG00000003405	14.5994	13.4478	24.5376	14.2182	21.7035	25.3729
ENSGALG00000003408	6.86189	8.6819	7.5476	8.82317	7.26932	7.54757
ENSGALG00000003409	4.04871	6.32732	4.99455	6.42714	4.38913	4.62902
ENSGALG00000003412	6.00707	7.85606	5.78446	8.41449	8.84778	5.79287
ENSGALG00000003416	13.3664	12.7693	14.0992	14.2007	14.0931	13.0728
ENSGALG00000003419	2.71745	2.93809	4.95198	3.6039	5.10421	5.04609
ENSGALG00000003420	7.00454	10.207	6.9366	8.42934	5.78446	6.32893
ENSGALG00000003425	0	0	0.10881	0	0.169882	0.231067
ENSGALG00000003426	1.08853	0.742931	1.84772	1.35022	1.50609	3.26456
ENSGALG00000003427	9.847	12.8093	16.4913	10.3463	13.0143	17.9848
ENSGALG00000003428	24.4561	31.47	28.4319	28.7767	27.1661	29.326
ENSGALG00000003429	22.898	27.6997	24.8031	27.5476	27.4119	23.5116
ENSGALG00000003430	6.75852	6.76872	9.82377	6.00075	7.79313	7.9292
ENSGALG00000003432	8.98412	5.89362	4.46641	4.57556	4.08242	3.94377
ENSGALG00000003433	3.67323	7.24048	14.2675	4.07572	12.8809	13.5549
ENSGALG00000003434	17.884	15.6553	13.2728	16.8715	15.3272	12.3532
ENSGALG00000003435	0.453672	0.478844	0.66327	0.771622	0.748359	1.58508
ENSGALG00000003438	23.0443	21.7632	37.9176	19.9966	27.4604	41.8221
ENSGALG00000003439	18.6578	18.9926	20.3308	19.406	20.5101	19.1207
ENSGALG00000003441	3.49999	3.19304	3.10384	3.96202	3.26212	3.70511
ENSGALG00000003443	8.33009	4.64149	4.35632	6.06296	4.62792	4.96571
ENSGALG00000003445	115.403	73.8328	85.3926	117.455	67.9198	61.2013
ENSGALG00000003446	0.448834	0.259845	0.488389	0.172971	1.03891	0.737599
ENSGALG00000003447	5.99202	6.43117	6.71872	7.79295	7.78323	8.6523
ENSGALG00000003454	73.877	77.7032	72.7008	72.1869	70.1101	68.9679
ENSGALG00000003457	25.9801	20.9802	23.4652	35.5604	32.9025	28.5675
ENSGALG00000003458	19.4171	18.639	18.938	17.703	18.7496	20.4235
ENSGALG00000003461	4.40131	2.93374	3.79358	2.59795	4.83169	3.16434
ENSGALG00000003464	0.257015	0.168488	0.151291	0.234975	0.186688	0.299233
ENSGALG00000003466	3.75551	2.44113	3.08284	5.09701	3.40458	3.53409
ENSGALG00000003467	23.2277	19.4323	20.7442	22.3128	19.3804	25.769
ENSGALG00000003470	0.357141	0.407773	1.0049	0.624661	0.719878	0.863738
ENSGALG00000003472	4.42197	2.74468	3.68463	3.7685	3.46271	2.08253
ENSGALG00000003473	14.7227	18.6513	18.6594	15.2546	19.5684	27.4943
ENSGALG00000003474	27.3254	26.2256	31.3482	28.189	33.9138	33.3649
ENSGALG00000003475	43.7291	49.3508	42.6019	30.7108	34.3966	43.5847
ENSGALG00000003476	6.7874	6.78327	6.65431	6.37925	7.17045	7.09342
ENSGALG00000003478	0.0903742	0.0600679	0.157448	0.241536	0.0329243	0
ENSGALG00000003483	54.7706	48.7738	59.929	52.0306	58.2423	68.7686
ENSGALG00000003484	6.2713	6.99123	14.1629	6.45805	10.1433	15.8995
ENSGALG00000003485	17.5732	12.3898	18.5744	13.1184	18.4041	20.1437
ENSGALG00000003487	25.858	27.9813	30.8846	22.4281	29.4933	31.9438
ENSGALG00000003492	32.1723	31.6085	28.4147	32.2718	29.6211	30.9273
ENSGALG00000003495	79.9374	75.81	83.3298	83.7531	75.5532	68.6224
ENSGALG00000003496	9.18098	10.0269	13.7235	10.5477	8.70392	12.2903
ENSGALG00000003498	9.73055	7.06982	9.0321	10.7247	9.52056	11.1685
ENSGALG00000003499	2.21374	3.08627	2.12933	3.45272	2.17387	2.86528
ENSGALG00000003500	2.87524	4.28987	5.17073	1.87453	5.38718	4.4278
ENSGALG00000003503	12.0048	11.7091	16.791	13.3685	16.1356	26.2789
ENSGALG00000003505	6.53638	6.25095	5.44179	6.95296	7.22954	6.88833
ENSGALG00000003507	3.39859	3.45468	4.51595	4.06871	4.23221	5.12614
ENSGALG00000003509	0	1.02138	0.542165	0.35689	0.816449	1.0418
ENSGALG00000003510	47.4408	41.2403	86.2067	39.7351	79.7508	95.5282
ENSGALG00000003517	14.0672	14.2187	16.3467	22.0953	19.1852	22.8302
ENSGALG00000003518	17.6182	15.8628	18.9668	18.1565	19.9594	21.2784
ENSGALG00000003520	8.0497	5.27529	8.25958	2.84363	3.82277	7.9185
ENSGALG00000003521	331.038	637.764	231.353	390.575	216.197	251.371
ENSGALG00000003522	136.163	135.043	152.83	132.711	139.872	155.947
ENSGALG00000003523	14.0932	13.699	16.4104	13.6389	16.9723	21.4918
ENSGALG00000003526	10.4802	9.88415	10.6995	11.1658	11.5142	12.2652
ENSGALG00000003527	10.7748	9.01628	16.7956	9.05522	14.4583	22.1503
ENSGALG00000003529	7.88875	7.50122	4.17524	9.53745	4.30454	5.59392
ENSGALG00000003532	268.767	270.865	205.291	252.961	196.009	197.251
ENSGALG00000003533	4.62589	5.08439	7.10574	6.04125	6.59465	6.41821
ENSGALG00000003536	17.2573	18.6986	27.2277	15.3299	25.7237	26.3594
ENSGALG00000003537	33.451	17.2546	94.9071	31.0344	60.0817	123.174
ENSGALG00000003539	20.8291	11.6912	19.0607	16.9967	15.1614	17.5422
ENSGALG00000003540	3.1631	2.8278	3.47297	3.2552	3.66344	4.41154
ENSGALG00000003545	0.71755	0.3144	0.185633	0.371001	0.396319	0.252251
ENSGALG00000003547	155.864	119.19	92.1836	131.711	75.6366	61.2838
ENSGALG00000003548	8.21638	5.79795	12.2406	4.39468	13.0828	14.9087
ENSGALG00000003549	18.3632	11.3397	10.2925	8.56616	10.4636	9.15184
ENSGALG00000003550	19.1625	13.6637	16.8657	12.635	17.2143	13.0156
ENSGALG00000003553	0.265002	0.133046	0.138891	0.242394	0.104514	0.0923847
ENSGALG00000003554	5.12711	8.77375	2.83682	9.64625	1.85504	5.13555
ENSGALG00000003558	36.7901	28.8788	43.518	27.5933	35.3283	33.1722
ENSGALG00000003559	6.91474	5.10609	18.909	9.34161	12.6824	36.0385
ENSGALG00000003560	0.662793	0.412002	0.732764	0.957118	1.22351	0.677967
ENSGALG00000003562	11.0826	10.8891	18.7902	8.95035	12.5343	15.5452
ENSGALG00000003563	21.8888	19.2401	19.6463	20.6146	17.0122	19.5629
ENSGALG00000003566	4.55655	4.91807	7.52262	4.44118	6.5294	6.17049
ENSGALG00000003567	25.6346	18.8545	14.5187	38.3906	18.1694	20.6149
ENSGALG00000003568	13.1761	8.87774	6.52174	6.28013	5.90656	4.71847
ENSGALG00000003569	19.179	12.8169	27.9091	12.1884	19.586	18.0927
ENSGALG00000003570	62.1699	56.9044	59.1715	66.0402	59.5015	67.315
ENSGALG00000003572	4.68833	4.82776	13.8973	5.34193	8.56595	18.3079
ENSGALG00000003573	0.149355	0	0.204897	0.407367	0.109288	0.0556771
ENSGALG00000003574	28.0426	25.296	32.5901	22.5943	32.718	31.5123
ENSGALG00000003575	8.22905	5.78436	8.27149	6.22004	7.33781	8.55071
ENSGALG00000003578	198.883	252.698	132.73	179.736	150.326	132.711
ENSGALG00000003580	47.5521	62.1115	49.2656	57.8871	48.1339	65.1128
ENSGALG00000003582	5.84877	5.83871	4.59823	5.59902	4.47186	3.2249
ENSGALG00000003584	96.3549	90.4752	128.937	59.3241	113.378	141.61
ENSGALG00000003588	0.243614	0	0.047988	0.0467432	0.108	0.375342
ENSGALG00000003589	6.915	4.59717	5.02198	10.7006	8.54297	11.8052
ENSGALG00000003590	4.68921	2.71576	10.5282	4.5347	11.3636	11.5826
ENSGALG00000003594	0.135074	0.338833	0.499824	0.624977	0.468576	0.331772
ENSGALG00000003595	0.309833	0.481112	0.496047	0.381583	0.455831	0.533701
ENSGALG00000003596	9.37002	11.5354	12.3408	6.54042	8.34685	6.73596
ENSGALG00000003597	41.6308	38.5614	36.2402	40.0932	38.8714	38.5244
ENSGALG00000003601	17.3451	20.0846	30.6802	17.6392	24.2848	29.6927
ENSGALG00000003602	0.641441	0.679586	1.1471	0.635855	1.29702	1.14342
ENSGALG00000003604	4.46764	3.97294	4.44164	5.75482	4.83274	5.53538
ENSGALG00000003605	4.21584	4.4471	3.98042	2.93306	5.04915	4.34479
ENSGALG00000003614	4.63394	3.10283	2.49129	4.04401	3.73338	3.4855
ENSGALG00000003624	0.180667	0.315631	0.329298	0.45209	0.462201	0.403493
ENSGALG00000003625	59.8249	57.0394	46.347	59.6178	49.6006	39.2103
ENSGALG00000003628	5.88848	6.89569	7.89207	4.46386	8.82711	5.97953
ENSGALG00000003631	1.42701	1.20432	1.80559	0.912829	1.53503	1.89911
ENSGALG00000003634	25.2831	28.4748	23.6356	23.1008	24.1615	24.5879
ENSGALG00000003636	1.76654	1.88709	1.5789	4.14763	1.07104	1.1958
ENSGALG00000003641	7.96768	9.01161	10.1882	5.06085	9.3536	7.73151
ENSGALG00000003642	21.215	24.5233	28.5384	21.1374	21.6394	22.262
ENSGALG00000003644	2.32474	0.79154	7.5706	6.15385	3.92966	13.5418
ENSGALG00000003645	5.43693	5.91822	13.5445	4.19782	10.7931	13.8302
ENSGALG00000003648	17.3096	15.4484	24.213	17.5381	23.6849	28.9978
ENSGALG00000003650	14.1821	12.9517	14.4188	12.1625	12.947	12.7164
ENSGALG00000003651	11.1761	8.92035	11.0102	12.7029	12.2531	9.89245
ENSGALG00000003652	20.3861	20.1463	22.0253	22.1746	21.8217	21.6862
ENSGALG00000003655	15.7324	14.7854	14.3942	12.4354	14.0309	13.7719
ENSGALG00000003657	2.69067	1.58181	1.82452	1.92798	2.26959	1.69607
ENSGALG00000003658	3.48362	2.96351	3.52344	2.54147	3.18618	3.67561
ENSGALG00000003660	7.18325	6.02207	15.6868	8.96615	11.2806	17.3859
ENSGALG00000003661	23.032	16.0625	9.62757	9.04315	7.787	4.39812
ENSGALG00000003663	4.88306	6.63867	5.0599	5.49562	5.35262	5.19658
ENSGALG00000003665	63.1722	48.2576	49.7207	59.9861	40.1489	52.678
ENSGALG00000003670	10.3624	12.9509	15.7352	17.4117	20.9046	14.5307
ENSGALG00000003672	13.2586	11.4446	15.1432	13.0078	15.2736	16.9242
ENSGALG00000003674	9.49093	9.80769	14.4462	9.13656	9.58929	10.3296
ENSGALG00000003675	13.3115	13.7494	17.5979	16.0678	16.0634	17.1129
ENSGALG00000003677	3.34863	4.92173	4.21343	5.24713	4.28295	3.819
ENSGALG00000003681	34.5269	35.3117	25.8771	28.9308	22.4252	20.5405
ENSGALG00000003682	14.5679	13.3968	14.2403	17.1461	17.5387	17.5844
ENSGALG00000003683	18.2514	21.1373	25.3781	21.56	25.3637	29.2296
ENSGALG00000003684	8.03312	8.35452	11.7261	11.4078	10.3817	10.7376
ENSGALG00000003687	6.25136	4.51337	4.30516	5.85629	5.44814	4.60203
ENSGALG00000003688	10.6718	11.4896	9.8342	9.93549	9.28844	10.1569
ENSGALG00000003689	15.4267	18.7269	11.5362	10.2689	5.42513	4.7814
ENSGALG00000003690	17.2231	32.9524	22.4035	76.3608	26.8872	11.1131
ENSGALG00000003691	22.0772	22.5573	22.0873	22.8096	22.4893	18.4466
ENSGALG00000003693	12.5178	15.3709	12.3485	17.0705	11.6229	12.4513
ENSGALG00000003695	7.53472	8.68653	15.2571	8.10083	10.9546	19.274
ENSGALG00000003696	13.0401	10.215	21.8982	11.1475	22.268	24.2154
ENSGALG00000003699	2.42767	3.01208	3.36775	2.82533	3.34576	3.51139
ENSGALG00000003701	8.40245	8.33866	8.01761	10.7316	10.1868	9.58442
ENSGALG00000003702	41.3797	43.3133	33.2953	36.6497	30.84	31.057
ENSGALG00000003703	11.5995	9.30168	11.0992	11.1435	9.53539	13.6321
ENSGALG00000003705	1.81767	1.41833	2.40015	1.04583	3.10291	2.22124
ENSGALG00000003708	5.66428	5.84084	6.3708	5.29733	6.65974	5.67763
ENSGALG00000003709	9.41351	8.11898	17.0162	7.61786	15.4441	14.999
ENSGALG00000003712	11.273	13.5709	11.6108	13.3419	10.1849	11.084
ENSGALG00000003713	0.0481316	0.144421	0	0.218135	0.105528	0.105597
ENSGALG00000003716	0.647754	1.31452	0.986519	2.1082	0.909746	0.830734
ENSGALG00000003717	10.1609	9.95242	11.1721	8.8915	9.25135	11.036
ENSGALG00000003720	4.52272	4.9068	4.30433	4.74474	3.50232	5.04139
ENSGALG00000003722	12.2126	10.7159	11.3692	8.56567	9.66275	9.70477
ENSGALG00000003726	39.121	60.9889	34.6346	33.479	38.1603	37.9251
ENSGALG00000003727	8.35677	7.04806	12.504	7.52778	12.2601	20.2789
ENSGALG00000003731	10.5719	13.0528	12.1947	10.5337	10.285	11.9686
ENSGALG00000003732	13.5778	17.8644	12.2735	16.9023	13.5234	14.0408
ENSGALG00000003733	6.15022	4.36458	4.6695	1.18038	5.44252	2.85419
ENSGALG00000003734	20.8386	19.2177	28.2063	24.4908	25.2508	25.413
ENSGALG00000003736	2.37603	2.11552	4.57042	1.25166	3.88934	3.24249
ENSGALG00000003738	40.7221	37.5924	44.6085	38.4681	38.9945	55.1129
ENSGALG00000003741	18.2075	25.2003	19.1815	26.2252	16.7411	18.456
ENSGALG00000003742	3.51957	4.20284	5.80836	5.73505	3.54757	5.26131
ENSGALG00000003743	9.10458	9.648	11.1983	8.966	9.82138	10.9445
ENSGALG00000003744	0.37362	0.295128	3.15215	0.963014	2.06507	3.2805
ENSGALG00000003745	23.2482	23.2873	30.9483	26.7628	29.9876	31.554
ENSGALG00000003747	20.7314	25.0225	15.6405	21.5432	16.2678	17.5243
ENSGALG00000003748	15.467	21.7129	12.6064	16.1755	14.6157	13.0209
ENSGALG00000003750	17.9838	16.3241	8.14537	12.38	6.63579	5.43881
ENSGALG00000003753	2.82142	3.48718	5.91438	3.08752	4.53571	6.8652
ENSGALG00000003757	17.5551	9.86535	19.3404	14.5903	16.2674	14.3458
ENSGALG00000003758	3.1819	2.42648	2.66697	2.73422	2.79807	3.61912
ENSGALG00000003759	0.672928	0.542056	1.93577	0.436845	1.43616	2.06766
ENSGALG00000003766	6.0137	6.07827	7.45204	6.35866	6.87139	6.64606
ENSGALG00000003767	3.05278	2.81065	2.79173	3.26444	3.59974	2.95316
ENSGALG00000003770	196.573	260.838	164.561	209.269	121.949	123.689
ENSGALG00000003771	7.78744	8.00895	8.73248	8.28203	8.04942	10.1522
ENSGALG00000003774	9.41235	10.4769	7.71813	13.2528	8.8649	9.38763
ENSGALG00000003775	5.53905	4.6298	4.15687	3.6082	6.23664	9.17332
ENSGALG00000003777	0.644191	0.299676	1.83013	0.439201	1.55283	2.15587
ENSGALG00000003778	16.1417	14.2579	18.1991	14.0464	14.8776	20.6907
ENSGALG00000003781	21.0289	17.5415	31.4524	19.0666	26.2222	33.3833
ENSGALG00000003786	18.4819	16.2543	18.8792	19.4938	21.3527	20.394
ENSGALG00000003788	16.5527	16.378	23.786	13.6957	22.0166	21.1776
ENSGALG00000003789	1.21097	1.07684	0.596586	0.913542	1.12135	1.43122
ENSGALG00000003792	2.8749	2.33211	2.6769	1.84675	3.47045	2.07146
ENSGALG00000003793	46.1552	47.1247	50.5359	48.7277	55.4938	47.3881
ENSGALG00000003794	19.1921	19.3494	15.1293	17.139	16.5116	15.0508
ENSGALG00000003795	39.3215	26.6903	32.5395	29.6769	28.3831	26.3396
ENSGALG00000003798	37.8943	35.105	54.7034	38.0313	47.8191	51.7827
ENSGALG00000003799	13.343	15.2056	17.5237	13.922	15.1281	17.029
ENSGALG00000003800	10.2147	9.14517	15.1365	8.61721	14.0415	16.0438
ENSGALG00000003802	1.21173	1.08501	2.25396	0.667476	3.01652	1.69949
ENSGALG00000003803	67.4484	49.027	127.427	37.4412	113.01	125.601
ENSGALG00000003805	20.4375	28.8348	23.848	17.99	22.4173	23.8176
ENSGALG00000003806	407.237	415.831	320.711	387.182	325.221	338.705
ENSGALG00000003807	18.0991	16.054	13.0454	13.4402	12.7084	11.9643
ENSGALG00000003812	29.4053	26.8685	24.02	18.7129	29.6943	19.1001
ENSGALG00000003814	0.41717	0.103237	0.311493	1.01997	0.580634	1.48152
ENSGALG00000003815	158.501	161.769	132.442	166.236	134.009	117.994
ENSGALG00000003816	1.21486	2.67888	1.6982	2.22233	1.37675	1.75691
ENSGALG00000003818	0.440152	0.399705	0.461353	0.691037	0.451746	0.429395
ENSGALG00000003819	2.70026	5.59471	3.84119	3.50892	2.49377	5.85533
ENSGALG00000003820	116.281	114.136	97.8931	116.482	88.4484	88.4124
ENSGALG00000003821	9.27699	7.26638	3.6239	7.36925	3.36956	6.16589
ENSGALG00000003824	16.0915	17.4352	23.0839	18.3083	20.4733	25.854
ENSGALG00000003826	9.97982	9.11921	8.77698	9.18388	8.15538	8.78839
ENSGALG00000003829	0.312322	0.155289	0.476307	0.372286	0.273564	0.448912
ENSGALG00000003832	23.5855	19.4063	23.5853	21.7898	24.4999	23.1067
ENSGALG00000003833	0.102416	0.0923394	0.107764	0.144966	0.0936154	0.0934696
ENSGALG00000003836	0.271903	0.176158	0.63456	0.281377	0.367262	2.01829
ENSGALG00000003837	0.290621	0.271683	0.629503	0.574701	1.13426	0.559666
ENSGALG00000003838	0.223534	0.232847	0.0377887	0.341462	0.224417	0.188693
ENSGALG00000003841	0.120734	0.120392	0.0949719	0.108919	0.0818447	0.0816636
ENSGALG00000003845	21.9301	21.6039	31.1873	23.9884	28.4993	33.4439
ENSGALG00000003849	0.147403	0.0458879	0.440914	0.0458048	0.319939	0.435194
ENSGALG00000003851	12.1689	9.33972	16.0516	11.8876	15.5011	18.0464
ENSGALG00000003854	4.42223	4.10049	5.53136	5.01946	5.4136	5.42015
ENSGALG00000003855	33.1654	24.2735	19.3241	22.0147	14.5152	18.5002
ENSGALG00000003859	4.58735	5.99601	6.23395	9.76971	5.10279	7.583
ENSGALG00000003860	2.00722	2.61232	2.24862	3.19948	2.35403	2.2135
ENSGALG00000003861	9.91025	11.9806	13.7928	10.2672	10.8771	10.6214
ENSGALG00000003862	5.63132	5.42957	9.56255	4.83254	6.04043	6.84256
ENSGALG00000003863	0.965183	0.995175	0.791547	1.04706	3.31604	2.20645
ENSGALG00000003866	0.206895	0.262329	0.119502	0.0557842	0.129768	0.0974853
ENSGALG00000003870	9.63059	8.12924	20.7055	10.575	15.1914	21.8296
ENSGALG00000003875	25.0756	30.1429	25.3453	23.565	24.1051	23.5524
ENSGALG00000003876	1.59309	2.29926	5.81793	4.47663	4.62889	7.10575
ENSGALG00000003878	91.713	75.2507	66.5209	81.1453	72.06	71.8774
ENSGALG00000003879	10.3182	9.20444	14.4459	8.86708	10.9252	15.4881
ENSGALG00000003880	11.2129	12.2695	13.4478	13.5699	13.6734	13.7157
ENSGALG00000003881	3.86263	4.18068	4.44934	2.83142	3.4754	3.64387
ENSGALG00000003882	61.7807	78.1513	71.4397	59.0922	56.1294	81.375
ENSGALG00000003883	12.0186	12.2845	11.9089	11.5633	12.3627	11.2176
ENSGALG00000003885	1.21262	2.18969	1.51927	2.31793	1.71201	1.7325
ENSGALG00000003886	11.2765	17.3506	19.2611	7.33685	17.0153	12.8654
ENSGALG00000003891	11.7511	12.1646	8.63799	12.2648	8.76155	9.92776
ENSGALG00000003893	23.4551	28.422	21.9651	25.1909	25.6148	22.0018
ENSGALG00000003895	0.0914734	0.0448923	0.788003	0.830222	0.652349	2.34826
ENSGALG00000003901	9.48541	5.39427	9.3486	7.24159	9.84052	11.2376
ENSGALG00000003904	0.597943	0.307965	1.70218	0.486512	2.27866	5.56498
ENSGALG00000003906	8.6036	7.10202	10.4787	6.91088	8.04719	9.33794
ENSGALG00000003907	17.4293	13.6584	26.4362	13.4674	26.8066	33.5062
ENSGALG00000003908	0.113651	0.0380803	0.883598	0.234166	0.518811	1.01687
ENSGALG00000003909	21.2462	20.1172	21.7276	20.2442	20.879	19.3205
ENSGALG00000003911	0.0209935	0.232086	0.42217	0.319285	0.253523	0.729844
ENSGALG00000003913	3.10099	2.93061	4.37598	2.60624	4.6705	4.90112
ENSGALG00000003914	1.01648	1.0909	3.38538	1.11795	2.49628	5.38675
ENSGALG00000003916	16.5253	17.4856	24.9251	21.5046	20.3269	19.6493
ENSGALG00000003919	17.3559	17.5915	19.9457	18.4648	17.0192	19.0169
ENSGALG00000003920	4.80223	5.02127	4.9004	4.99231	4.9913	5.58162
ENSGALG00000003921	23.8082	19.9322	14.4589	16.6542	14.382	14.7831
ENSGALG00000003922	27.2618	33.4987	17.205	23.7644	16.1988	20.6547
ENSGALG00000003923	34.9046	54.2673	39.5238	28.3691	25.3629	42.2585
ENSGALG00000003924	20.7446	18.2925	22.0669	19.4273	23.3016	19.7351
ENSGALG00000003925	0.0395393	0.0208373	0.477984	0.0183182	0.308907	0.627722
ENSGALG00000003928	0.337226	0.109894	1.05847	1.22231	0.866377	5.11796
ENSGALG00000003929	22.6314	18.7854	22.1763	21.2201	24.118	24.5001
ENSGALG00000003930	3.25015	3.86062	5.40038	3.57317	7.16329	5.19017
ENSGALG00000003932	31.5653	46.3853	66.8224	43.9792	57.967	71.2785
ENSGALG00000003933	30.8844	23.342	32.6295	25.7233	37.3413	28.5159
ENSGALG00000003935	3.05839	2.81836	2.32157	2.06944	2.2562	2.52502
ENSGALG00000003936	67.8011	56.669	56.5178	56.4444	61.8914	46.0024
ENSGALG00000003937	9.13892	11.3052	11.642	9.05999	8.75708	9.811
ENSGALG00000003939	37.9683	41.5237	22.9684	34.7849	40.7939	22.8154
ENSGALG00000003941	20.851	23.051	25.1736	21.7796	24.3685	26.8128
ENSGALG00000003942	14.9894	13.0937	19.0245	14.1989	17.0754	19.9566
ENSGALG00000003944	0.857304	2.03255	2.16078	1.21528	1.74679	2.33518
ENSGALG00000003947	108.291	112.378	100.081	133.709	86.2164	98.3536
ENSGALG00000003948	116.04	115.022	83.1422	94.5342	70.3192	87.4259
ENSGALG00000003950	17.8004	17.026	19.0506	16.7089	15.4097	17.9684
ENSGALG00000003952	1.52559	0.513941	1.47325	0.655508	1.5821	1.77946
ENSGALG00000003955	2.03306	2.55546	3.13245	0.816495	2.55467	1.1012
ENSGALG00000003958	9.08444	9.40865	8.05066	8.43512	7.62507	8.53083
ENSGALG00000003959	20.1724	20.5652	29.633	15.0958	22.073	27.6624
ENSGALG00000003966	840.645	753.691	735.381	751.555	823.921	881.801
ENSGALG00000003969	45.8317	43.2769	43.777	40.6953	44.3075	38.8984
ENSGALG00000003972	1.73278	1.04581	0.989703	1.87119	0.747159	1.26289
ENSGALG00000003973	19.4379	19.0665	17.9022	25.611	13.9573	16.1651
ENSGALG00000003976	2.12091	2.51743	3.76516	2.63389	2.83986	3.77384
ENSGALG00000003977	26.007	32.7997	22.7179	32.6006	23.2718	23.2762
ENSGALG00000003978	0	0	0.298213	0.122434	0	0
ENSGALG00000003979	3.7751	3.90612	6.14464	3.89725	4.69991	6.68028
ENSGALG00000003980	0.0714783	0	0.358753	0.0384411	0.607717	0.160817
ENSGALG00000003985	9.86915	7.38638	11.3191	8.82419	12.3574	13.795
ENSGALG00000003986	17.1022	15.9572	15.223	18.6305	17.022	20.1974
ENSGALG00000003987	5.24791	3.47724	9.10981	7.62193	10.738	9.90153
ENSGALG00000003990	4.65108	3.15651	4.29581	3.67725	5.09155	5.24269
ENSGALG00000003991	19.933	19.7204	19.6218	19.4755	20.0346	18.4317
ENSGALG00000003995	9.39644	8.2632	13.5566	9.8896	12.1049	13.0023
ENSGALG00000003999	5.27334	6.41944	5.47449	4.10033	5.54144	4.90089
ENSGALG00000004002	51.7573	53.6767	71.5414	48.978	64.2419	66.9766
ENSGALG00000004003	34.9933	30.8966	24.8491	29.1059	23.0788	23.8301
ENSGALG00000004004	8.44621	8.47497	11.2711	8.89403	11.2157	12.5344
ENSGALG00000004005	45.647	42.5586	40.2687	51.5504	35.9607	42.1091
ENSGALG00000004009	1.84999	1.91039	1.89921	1.71805	4.40154	1.99967
ENSGALG00000004017	17.4538	12.2411	7.64962	10.0648	10.7505	8.16052
ENSGALG00000004019	5.84622	6.64425	7.9229	6.66199	5.68225	7.93268
ENSGALG00000004028	0.714538	0.175344	0.103166	0.701608	0.671399	1.52324
ENSGALG00000004033	5.40848	5.74481	3.9574	2.36785	3.81833	2.58106
ENSGALG00000004034	71.117	70.9859	55.8892	63.5095	54.4872	57.0925
ENSGALG00000004035	0.263478	0.521376	0.272192	1.23663	0.810029	0.704332
ENSGALG00000004037	6.62035	5.1479	7.11383	4.98557	6.42433	7.08223
ENSGALG00000004038	6.67991	5.15736	6.17864	5.43609	6.76892	5.43163
ENSGALG00000004039	51.6654	41.5301	47.2063	45.3277	53.7874	46.3216
ENSGALG00000004040	31.2073	27.1201	30.5751	29.2196	27.9317	29.9631
ENSGALG00000004042	9.09727	11.235	13.3005	10.5236	10.6848	11.4282
ENSGALG00000004045	8.20348	12.207	12.0309	6.2361	12.03	8.72415
ENSGALG00000004046	5.20507	6.96833	5.7076	8.72738	5.33339	6.51567
ENSGALG00000004047	31.4271	31.262	25.4153	35.55	21.6577	27.8374
ENSGALG00000004048	16.4623	20.7995	17.7856	20.4935	18.1012	17.9834
ENSGALG00000004049	13.4883	11.6667	17.5806	12.1093	15.0646	17.042
ENSGALG00000004052	14.047	13.4747	17	11.9239	15.2801	15.5163
ENSGALG00000004055	15.3444	15.0333	18.1152	14.4981	16.6972	22.1729
ENSGALG00000004057	20.2331	17.7113	20.0968	19.1692	19.9794	18.6214
ENSGALG00000004058	1.04088	0.88434	1.39425	0.849321	1.68322	1.14512
ENSGALG00000004059	1.66748	2.00391	3.4977	0.717146	2.1626	4.63432
ENSGALG00000004063	13.1766	12.052	18.9462	12.2746	18.738	19.8699
ENSGALG00000004064	0.228981	0.142705	1.4217	0.168559	1.03154	1.14277
ENSGALG00000004065	12.4923	15.6208	11.7521	14.5252	14.2912	12.3561
ENSGALG00000004066	0.731741	0.661634	0.650865	0.549899	0.631561	1.05972
ENSGALG00000004068	8.31871	7.3244	8.07208	8.30272	8.31823	10.3148
ENSGALG00000004069	0	0.215357	0	0.0644781	0	0.15861
ENSGALG00000004070	12.9656	15.8362	18.3236	10.7374	19.572	22.2787
ENSGALG00000004071	0.372562	0.461085	1.59851	0.217196	0.328437	0.541325
ENSGALG00000004078	0.30675	0.19424	5.32586	1.33315	3.25126	5.59689
ENSGALG00000004079	10.987	13.8126	11.3172	12.3992	9.87346	9.75717
ENSGALG00000004081	1.58372	1.13619	1.21748	1.73148	0.92287	1.02435
ENSGALG00000004082	17.3107	16.4446	17.4878	12.8813	15.4805	14.3223
ENSGALG00000004083	0.0348219	0.0167063	0.121514	0.093196	0.0634944	0.129763
ENSGALG00000004085	7.47368	6.48985	12.8849	7.74899	11.2301	12.2993
ENSGALG00000004087	6.84436	5.96418	7.54923	2.38649	7.98664	5.35214
ENSGALG00000004088	7.43421	12.6975	9.68185	9.98134	8.8531	10.1308
ENSGALG00000004096	19.7788	17.4892	10.3499	13.9712	9.15024	7.71222
ENSGALG00000004097	2.08922	2.08855	3.1191	2.75518	2.904	3.63672
ENSGALG00000004098	18.7591	18.987	23.7718	16.3327	23.6137	22.6763
ENSGALG00000004104	8.40616	9.43043	10.7581	8.22168	10.332	9.84641
ENSGALG00000004106	30.3238	35.1158	25.4213	21.4802	25.6911	27.2221
ENSGALG00000004107	394.028	334.148	401.101	393.763	468.826	423.636
ENSGALG00000004108	50.4243	51.3119	44.0427	37.3856	40.278	39.8076
ENSGALG00000004110	13.1909	10.4447	15.3715	10.0554	16.4167	16.4139
ENSGALG00000004111	0.213263	0.112671	0.162182	0.266691	0.296732	0.271448
ENSGALG00000004112	15.5912	13.3415	10.6887	14.6906	11.9865	13.1294
ENSGALG00000004113	2.45647	3.57714	2.21953	3.77725	2.1956	3.02411
ENSGALG00000004115	72.3003	66.305	66.131	62.9555	62.8305	66.1166
ENSGALG00000004116	0.396347	0.420984	0.617459	0.440534	0.643336	0.40689
ENSGALG00000004121	22.2809	24.8494	27.287	20.7629	29.0054	23.1289
ENSGALG00000004122	65.18	66.9888	58.985	52.6647	51.8827	54.0054
ENSGALG00000004123	3.3667	2.29147	10.4883	3.95884	6.80749	15.6885
ENSGALG00000004127	1.76333	1.21385	2.13776	1.61058	2.45512	3.67659
ENSGALG00000004128	3.03988	2.24958	2.27237	3.65652	3.20839	4.29593
ENSGALG00000004129	0.443929	0.388652	0.355707	0.728757	0.722967	0.497604
ENSGALG00000004133	27.1057	27.2726	24.6881	24.8356	21.7329	20.8167
ENSGALG00000004140	40.6652	49.4542	43.1286	44.619	37.7498	38.5059
ENSGALG00000004143	168.889	148.599	195.597	154.255	185.145	200.316
ENSGALG00000004144	15.008	16.3494	11.7126	12.8286	11.9962	12.8038
ENSGALG00000004146	0.259062	0.147051	0.379402	0.552271	0.325377	0.286245
ENSGALG00000004150	2.74461	4.03011	2.03028	2.4592	2.33289	2.41413
ENSGALG00000004152	17.2885	14.7455	20.6439	17.0664	19.829	26.3001
ENSGALG00000004153	3.44779	3.2199	4.23286	3.20067	6.02264	3.73871
ENSGALG00000004156	14.4331	12.0442	18.6688	13.6081	18.2361	18.1607
ENSGALG00000004160	64.9313	66.5104	63.3701	65.5922	61.119	67.5926
ENSGALG00000004161	194.036	146.567	376.47	107.033	357.254	354.171
ENSGALG00000004162	3.34054	1.46284	6.87183	3.03138	9.94257	15.4133
ENSGALG00000004163	0.0636188	0.0316723	0.0994618	0.141572	0.0344472	0.211812
ENSGALG00000004165	33.1946	32.0404	33.5533	29.2112	31.8811	29.5662
ENSGALG00000004166	14.0311	12.2941	16.8003	13.6603	13.5219	15.7815
ENSGALG00000004167	5.82894	5.03277	4.29975	5.64666	17.6569	8.57774
ENSGALG00000004168	17.3529	20.05	24.1267	18.5744	24.6801	23.782
ENSGALG00000004169	37.6429	45.0745	35.9771	28.8159	33.11	31.237
ENSGALG00000004170	17.2333	21.8232	38.2721	23.6496	31.4121	35.337
ENSGALG00000004171	7.52845	7.30009	10.6624	7.99546	9.83218	10.997
ENSGALG00000004172	14.0125	12.8986	19.1564	15.0462	16.5852	19.3347
ENSGALG00000004173	0.12837	0.16899	0.0701678	0.123596	0.0982826	0.160521
ENSGALG00000004174	34.7473	33.1005	44.4222	33.7415	36.5455	48.1174
ENSGALG00000004176	96.6527	80.0613	82.8809	96.5737	85.9514	89.3075
ENSGALG00000004179	8.69117	7.326	10.6172	7.10535	9.76326	11.0849
ENSGALG00000004180	38.6197	41.3836	52.9597	32.9731	42.0262	58.3724
ENSGALG00000004184	3660.79	2774.87	2550.13	3067.74	2570.37	2123.95
ENSGALG00000004186	10.0877	9.85311	7.54183	6.1879	6.77478	7.34861
ENSGALG00000004189	10.1779	16.1866	9.25628	12.451	12.1923	12.5893
ENSGALG00000004190	12.0876	13.0955	14.1906	15.5797	15.9921	16.3228
ENSGALG00000004191	6.43072	6.73809	12.1068	8.70312	10.1713	15.6734
ENSGALG00000004192	12.3124	11.757	10.9162	10.3531	11.0666	9.46324
ENSGALG00000004193	2.27291	1.86312	3.41294	2.98025	3.86874	3.86646
ENSGALG00000004195	12.288	14.2255	13.6661	11.3779	11.9654	18.2559
ENSGALG00000004196	0.265202	0.28527	0.075592	0.295265	0.270726	0.1391
ENSGALG00000004197	11.4634	10.597	12.519	11.5856	12.8245	12.5205
ENSGALG00000004198	41.3136	36.3344	54.298	49.9085	55.6742	62.5751
ENSGALG00000004199	5.97354	6.90915	17.6644	3.6447	18.6733	18.1228
ENSGALG00000004200	17.1041	17.0688	23.7584	17.1163	15.7525	23.4939
ENSGALG00000004203	16.6019	17.6448	19.1246	22.4325	19.0776	16.3525
ENSGALG00000004204	14.7039	16.0674	15.1451	13.4838	15.0395	14.0922
ENSGALG00000004205	81.5464	89.509	93.6116	91.2259	82.1935	90.0161
ENSGALG00000004209	0.205298	0.108669	0.354239	0.344404	0.139105	0.159444
ENSGALG00000004212	34.587	35.4969	41.8402	30.2187	40.9484	37.4335
ENSGALG00000004215	20.2166	20.8379	20.2564	23.0014	25.0142	24.3864
ENSGALG00000004216	17.4099	12.2244	23.0459	22.9889	19.181	25.8003
ENSGALG00000004220	170.742	192.971	182.821	153.417	153.109	166.162
ENSGALG00000004221	1.53446	1.25736	1.43348	1.66594	2.2794	1.87019
ENSGALG00000004222	32.8737	36.1995	36.8674	30.7262	36.1867	40.6783
ENSGALG00000004224	7.8219	7.26492	12.653	7.94314	11.7105	14.9087
ENSGALG00000004225	14.8871	14.8822	16.7935	12.8726	14.7908	13.2318
ENSGALG00000004227	7.56455	7.56732	6.54219	7.43872	6.26817	5.91281
ENSGALG00000004228	5.40534	5.32188	9.16284	3.99951	7.58569	7.37587
ENSGALG00000004230	0.261949	0.196272	0.105197	0.34592	0.107691	0.333453
ENSGALG00000004231	3.23461	3.65738	4.02979	3.15867	3.92525	2.46229
ENSGALG00000004234	2.56375	3.80519	2.61759	3.35124	3.9984	3.96557
ENSGALG00000004236	4.8344	4.38593	5.78716	4.14584	5.38933	5.74255
ENSGALG00000004237	87.0298	88.7745	70.8334	80.7936	68.7343	64.6994
ENSGALG00000004238	9.44546	9.2448	12.0195	10.5679	10.5737	11.0652
ENSGALG00000004239	1.68204	2.07986	1.90118	2.06314	1.3704	1.82246
ENSGALG00000004240	7.60786	6.93318	7.02888	7.9413	8.08439	9.11126
ENSGALG00000004243	6.39083	1.95054	33.2965	9.0776	23.8515	40.8528
ENSGALG00000004244	5.38571	5.0436	7.11978	6.90142	6.13698	6.27286
ENSGALG00000004245	22.75	33.8499	22.3491	47.4242	27.0704	29.5544
ENSGALG00000004246	0.472245	0.438673	0.371623	0.361889	1.19511	0.848322
ENSGALG00000004247	0.237023	0.0712535	0.124721	0.254397	0.258202	0.369776
ENSGALG00000004249	0.837112	0.488372	0.741459	0.952982	1.68697	1.63143
ENSGALG00000004250	8.51589	9.7295	8.1902	8.41341	6.75989	7.35596
ENSGALG00000004252	1.09186	0.925618	0.681244	1.98558	0.951912	1.24775
ENSGALG00000004254	4.25506	3.473	7.05838	4.23563	7.24336	9.28279
ENSGALG00000004255	7.39947	8.0597	17.346	7.97706	13.4239	21.5752
ENSGALG00000004257	1.41211	1.56604	1.58765	1.49171	1.92355	2.15904
ENSGALG00000004259	36.8151	37.5708	40.2491	37.2925	34.4628	50.6234
ENSGALG00000004261	0.129135	0.106552	0.0354664	0.0702092	0.0708115	0.302906
ENSGALG00000004263	64.6345	59.4478	58.4001	76.6312	64.5297	64.8676
ENSGALG00000004266	9.57568	11.5698	12.3424	13.7944	11.6748	11.3928
ENSGALG00000004267	0.071803	0.0235786	0.0488854	0.260232	0.262633	0.15991
ENSGALG00000004268	15.7182	16.9388	21.8143	14.672	18.581	23.0241
ENSGALG00000004270	8.41699	5.29277	14.8384	6.20717	11.4557	12.6766
ENSGALG00000004272	8.22051	8.58349	9.44877	7.05037	10.8107	9.58147
ENSGALG00000004273	22.4208	20.6511	46.4564	16.0751	38.0396	38.2175
ENSGALG00000004274	2.35855	3.06315	3.2355	2.87135	3.15388	4.05113
ENSGALG00000004276	25.5617	20.4878	13.2616	21.1655	9.9295	11.2033
ENSGALG00000004282	15.5472	16.7315	13.3309	15.26	15.0121	13.2692
ENSGALG00000004286	1.54178	0.84785	2.04422	1.6022	1.82444	1.79454
ENSGALG00000004288	5.74352	6.46539	5.32228	4.53207	5.84783	4.72522
ENSGALG00000004290	1.20249	0.20091	0.839206	1.08515	1.54905	1.03637
ENSGALG00000004294	8.3604	10.4499	7.3669	4.44392	7.67823	9.28152
ENSGALG00000004295	29.4592	22.8621	30.9497	24.9874	36.4787	30.5404
ENSGALG00000004297	0.0593923	0.0934943	1.02378	0.27595	0.431192	1.43395
ENSGALG00000004300	13.2754	12.8051	15.8478	13.011	14.6338	16.1
ENSGALG00000004302	39.8029	35.831	33.929	34.1868	34.8316	34.5346
ENSGALG00000004304	81.1007	110.601	83.761	101.361	79.4806	78.6938
ENSGALG00000004306	3.76898	3.10634	3.48815	3.28128	4.45253	5.38619
ENSGALG00000004309	1.36268	1.89008	2.2815	1.45211	1.41516	1.73733
ENSGALG00000004310	29.6048	27.0017	22.2162	24.4736	20.3169	18.9063
ENSGALG00000004311	10.1008	8.54209	15.8281	8.09854	12.0027	10.2409
ENSGALG00000004319	1.5824	2.10103	1.185	1.48098	1.39377	2.14379
ENSGALG00000004320	0.196047	0.08287	0.343115	0.284762	0.60926	0.107348
ENSGALG00000004321	17.3534	16.1618	24.9485	16.991	23.8767	28.6997
ENSGALG00000004322	0.106382	0	0.13627	0.0483387	0.0874393	0.400818
ENSGALG00000004323	3.64232	4.7754	5.4303	4.17096	6.00062	6.86563
ENSGALG00000004324	2.85377	2.74831	3.2084	2.65728	2.66261	2.96729
ENSGALG00000004325	64.0246	59.9075	71.9398	57.9788	73.8107	58.5594
ENSGALG00000004326	19.636	17.7402	24.4337	20.2326	21.4096	24.7748
ENSGALG00000004328	4.28287	3.57809	5.71811	4.9456	6.68253	5.93985
ENSGALG00000004329	5.42779	6.38616	7.42316	5.65242	7.61427	7.38949
ENSGALG00000004332	0.206404	0.137919	0.218205	0.0460118	0.151472	0.232
ENSGALG00000004333	9.92045	10.4806	14.0671	11.0259	15.376	14.5046
ENSGALG00000004334	4.42913	2.86531	4.01021	3.69379	3.67927	2.65656
ENSGALG00000004336	0.14302	0.0969181	0.0552699	0.110945	0.289153	0.194726
ENSGALG00000004339	0.0487387	0.0387679	0.0512041	0.0351257	0.235244	0.0109433
ENSGALG00000004341	2.97442	2.75268	3.44501	3.56352	4.43099	4.07753
ENSGALG00000004342	19.7776	15.5994	16.0093	15.5067	21.3912	17.1564
ENSGALG00000004343	1.08175	0.69124	0.389676	0.971307	0.284415	0.467656
ENSGALG00000004345	2.94059	1.92314	2.60867	2.39336	1.98116	2.09416
ENSGALG00000004346	0.395732	0.0926613	0.075858	0.36313	0.165176	0.269888
ENSGALG00000004347	11.3815	8.84089	13.3111	8.48689	14.3071	10.9564
ENSGALG00000004348	3.0434	2.59119	3.2387	3.84345	3.05521	4.36508
ENSGALG00000004350	2.04089	1.71373	5.25576	1.97916	2.90919	2.94737
ENSGALG00000004352	39.4026	36.9351	47.0521	41.9563	39.9035	45.783
ENSGALG00000004353	29.1015	24.7067	21.9691	26.0774	23.4983	23.4266
ENSGALG00000004355	17.5121	17.1681	16.749	13.083	14.265	22.2505
ENSGALG00000004357	112.276	124.407	115.735	108.422	100.882	99.0128
ENSGALG00000004362	15.8347	12.9067	15.9274	13.6745	15.3938	15.2879
ENSGALG00000004363	19.3367	16.1285	18.8432	17.2585	19.9241	20.5918
ENSGALG00000004364	5.8502	7.32046	7.64117	6.42304	7.33549	7.2098
ENSGALG00000004366	18.2037	18.1932	16.7289	21.8007	17.0154	16.7268
ENSGALG00000004367	0.194183	0.0842905	0.373702	0.282257	0.187599	0.188357
ENSGALG00000004369	3.84632	3.93545	8.92622	3.95312	7.76165	11.7429
ENSGALG00000004370	4.31253	4.10464	4.56055	3.8949	5.44259	4.2194
ENSGALG00000004372	14.7994	13.2832	16.8822	16.2935	20.2628	27.9259
ENSGALG00000004373	0.0241106	0.133074	0.0901289	0.106344	0.0657633	0.0678876
ENSGALG00000004375	46.2406	42.5351	59.5389	38.6659	51.632	64.1743
ENSGALG00000004376	1.8162	3.02485	3.33469	3.35862	2.64685	3.40567
ENSGALG00000004378	6.26572	5.93903	6.93917	6.59504	7.04559	6.66516
ENSGALG00000004383	24.7243	18.9942	27.1559	19.4792	28.1344	30.0779
ENSGALG00000004386	0.655635	0.702192	2.38351	1.01982	1.51958	1.4893
ENSGALG00000004387	22.5349	23.4223	25.9178	19.0857	28.7297	33.3944
ENSGALG00000004390	12.9201	13.5256	19.2262	11.5679	18.9878	15.3729
ENSGALG00000004394	1.43386	0.817277	0.720094	1.15423	1.37171	1.86255
ENSGALG00000004397	7.70331	7.65362	9.83745	4.00234	8.69924	8.03579
ENSGALG00000004398	0.561531	0.610539	1.29918	1.31678	1.85947	1.90852
ENSGALG00000004400	5.96558	4.80746	13.1048	4.77324	8.13327	14.1019
ENSGALG00000004401	0.121782	0.0970893	2.65855	0.663128	1.42901	9.29615
ENSGALG00000004410	32.6771	25.5642	31.4149	28.1433	37.6127	29.9351
ENSGALG00000004412	17.5443	17.869	19.1481	15.9537	20.0007	19.8455
ENSGALG00000004413	8.44336	8.04882	7.29418	8.26269	8.62858	6.75212
ENSGALG00000004416	6.5294	5.7816	5.81248	6.85739	6.02624	6.05175
ENSGALG00000004418	0.355858	0.062051	0.256829	0.151369	0.0914257	0.115748
ENSGALG00000004420	1.86837	2.47843	3.18338	3.67908	3.40353	4.34385
ENSGALG00000004424	0.404461	0.89596	0.866411	0.765154	0.743613	1.03439
ENSGALG00000004425	14.0701	13.5808	15.133	10.3143	15.3855	12.5079
ENSGALG00000004428	0.650781	0.653178	1.5374	0.780466	0.601654	0.973223
ENSGALG00000004431	116.759	111.367	86.4735	130.707	79.2909	79.241
ENSGALG00000004435	21.5829	24.8894	28.7565	20.4182	25.9283	32.0583
ENSGALG00000004436	1.87435	1.70275	14.2395	1.65149	9.54915	16.8118
ENSGALG00000004437	10.7432	12.461	10.8361	10.6125	8.56856	8.97684
ENSGALG00000004438	4.3845	2.90775	4.68467	6.26768	7.05549	4.95079
ENSGALG00000004440	19.9357	16.3478	24.0489	21.217	21.7997	22.9303
ENSGALG00000004441	0.784149	0.557957	11.9927	3.94284	4.98898	18.7313
ENSGALG00000004442	58.3502	52.8911	38.3128	48.7059	33.9166	34.6179
ENSGALG00000004444	10.1848	9.71581	18.8673	5.75326	9.71216	17.2092
ENSGALG00000004446	0.080925	0.358964	0.0411825	0.147229	0	0.224364
ENSGALG00000004448	0.0734831	0.0360697	0.093235	0.0504689	0.101137	0.163292
ENSGALG00000004455	6.30523	6.12378	6.16171	4.36178	6.42621	5.42011
ENSGALG00000004460	6.03824	7.62568	9.50625	6.18837	8.22247	10.7933
ENSGALG00000004465	59.6342	48.564	44.7164	45.9703	41.5547	49.7887
ENSGALG00000004467	7.62978	8.33738	6.56713	7.16973	6.2948	5.85966
ENSGALG00000004469	10.5762	8.32097	8.95268	9.57015	9.1849	10.7682
ENSGALG00000004472	0.779944	0.916943	1.04269	0.864072	1.03513	1.10291
ENSGALG00000004474	29.4813	32.8311	32.8809	36.333	28.9985	28.3902
ENSGALG00000004476	3.94008	4.99734	3.87476	7.45129	3.68913	4.84432
ENSGALG00000004477	8.1956	7.63521	10.0045	10.0197	8.52429	10.3451
ENSGALG00000004480	26.1352	24.9563	28.3478	34.0731	20.5483	27.9352
ENSGALG00000004483	20.0316	21.8175	29.155	22.6352	22.2817	26.7387
ENSGALG00000004486	11.7831	11.3305	10.5617	13.1047	11.2361	10.7186
ENSGALG00000004489	2.49318	1.4584	5.06857	1.88399	2.8821	2.93662
ENSGALG00000004491	0.791404	0.632471	1.25072	0.499477	0.680862	0.743055
ENSGALG00000004492	2.47938	2.41416	3.784	2.41076	3.70271	5.6733
ENSGALG00000004493	24.7993	24.133	22.5451	26.644	25.3346	24.8175
ENSGALG00000004494	8.51366	8.46255	13.9245	7.83419	11.2366	15.0714
ENSGALG00000004495	0.0541768	0.210914	0.106347	0.604884	0.305297	0.579667
ENSGALG00000004496	26.2661	23.3166	40.4267	23.4965	43.8516	41.9661
ENSGALG00000004498	6.96394	6.8724	4.19315	8.64434	4.27538	4.23053
ENSGALG00000004500	6.20982	5.42387	8.62195	6.91122	7.44368	11.1146
ENSGALG00000004503	3.61829	2.81861	4.44511	3.18747	4.02519	3.66501
ENSGALG00000004504	0.0862165	0.0701822	0.057576	0.186415	0.189361	0.158798
ENSGALG00000004505	2.14165	2.81784	1.34287	3.75831	2.71802	4.41105
ENSGALG00000004506	32.9136	35.0738	33.7319	35.6395	36.5257	31.5367
ENSGALG00000004508	0.0756613	0.101804	0.176572	0.20008	0.396729	0.39301
ENSGALG00000004509	607.341	598.669	833.518	770.482	930.247	754.956
ENSGALG00000004514	0.909278	0.901407	0.839195	0.961788	0.34438	0.656621
ENSGALG00000004515	4.94008	5.19391	3.03224	4.8065	3.10537	3.84612
ENSGALG00000004517	4.28218	4.58621	4.18036	6.80757	3.50699	5.53237
ENSGALG00000004518	1.77034	1.03472	1.5791	1.51479	0.906539	1.03389
ENSGALG00000004519	4.85565	4.82008	4.67505	5.12555	6.68565	7.25721
ENSGALG00000004521	105.58	106.373	147.167	175.367	192.266	161.204
ENSGALG00000004523	12.5914	14.2701	18.5025	11.1499	15.1711	16.9316
ENSGALG00000004525	0.782671	0.366557	7.77747	1.4572	3.39093	9.5424
ENSGALG00000004528	14.2375	14.264	16.0075	14.2676	14.2901	12.2585
ENSGALG00000004529	39.3347	33.9631	35.1133	35.6318	35.7662	36.6701
ENSGALG00000004530	0.249619	0.247514	0.830129	0.6866	0.414395	0.553673
ENSGALG00000004531	52.6168	58.269	35.0937	48.6504	33.7484	26.5259
ENSGALG00000004532	1.92346	1.95409	2.54605	1.3694	2.23452	2.07193
ENSGALG00000004533	23.0506	24.716	22.1009	20.3373	21.6954	18.3403
ENSGALG00000004534	24.9088	25.1698	27.0675	27.3338	27.7401	29.7895
ENSGALG00000004538	0.331244	0.277264	1.58157	0.752484	1.11161	3.10333
ENSGALG00000004542	9.08092	8.48644	9.65184	5.1785	11.0505	8.41187
ENSGALG00000004545	0.0465244	0.00941536	1.98327	0.381091	1.16018	2.115
ENSGALG00000004550	17.356	16.6955	23.4148	13.2219	17.6818	20.8101
ENSGALG00000004553	27.1036	22.9398	33.6268	23.2335	30.8832	33.5923
ENSGALG00000004554	30.0826	26.7192	27.9475	24.7357	23.6369	27.6331
ENSGALG00000004555	30.8689	30.3304	32.8634	32.6032	32.218	35.6694
ENSGALG00000004557	19.2724	18.6452	30.5925	21.6274	27.3871	40.626
ENSGALG00000004559	4.43533	3.94091	4.01458	4.02605	5.91337	3.09827
ENSGALG00000004562	5.95447	6.44268	17.5639	11.2408	13.0052	29.1925
ENSGALG00000004568	0.0958686	0	0.130783	0.0729352	0.157223	0
ENSGALG00000004569	6.80634	7.46769	10.2909	9.31776	8.65646	10.0261
ENSGALG00000004570	6.37451	6.65316	5.74878	3.29624	5.73502	4.628
ENSGALG00000004571	47.6951	46.9959	50.7611	47.5892	52.638	55.2998
ENSGALG00000004573	9.13721	9.92901	19.902	10.3198	14.5023	33.2319
ENSGALG00000004574	0.249588	0.310982	0.981954	0.390288	1.71593	0.422103
ENSGALG00000004578	8.79325	9.11961	9.06279	7.39216	9.46104	12.5058
ENSGALG00000004581	37.5009	31.0775	19.7213	22.5811	17.6041	13.4226
[truncated: 14,824 more rows]

## Sheet: All genes identified in LYF
ENSEMBL	LYF-1	LYF-2	LYF-3	LYF-4	LYF-5	LYF-6
ENSGALG00000000003	0.951196	0.905584	0.712634	0.604348	1.45906	0.871847
ENSGALG00000000011	9.64444	7.91076	10.6517	7.5603	10.0972	7.81784
ENSGALG00000000038	0.345262	0.253105	0	0.167251	0	0.167163
ENSGALG00000000044	0.497573	0.760227	0.902129	0.491526	0.629753	0.608795
ENSGALG00000000048	0.648021	0.285264	0.59497	0.825014	0.814998	1.17923
ENSGALG00000000055	42.551	55.3264	68.8485	44.0266	46.6927	41.474
ENSGALG00000000059	0.706909	1.44611	7.28661	0.855784	1.07198	0.981258
ENSGALG00000000067	13.854	16.7441	10.5336	10.5629	11.4373	14.5553
ENSGALG00000000071	1.98326	1.33352	2.26588	1.7845	2.0746	1.62848
ENSGALG00000000086	29.2525	35.0281	35.2329	24.8469	31.9601	32.9535
ENSGALG00000000091	11.0701	13.9041	16.8202	10.7396	13.3242	12.7813
ENSGALG00000000094	38.8553	42.3055	38.0806	30.0289	35.0861	37.9631
ENSGALG00000000102	21.0354	27.7605	23.3549	13.8359	20.5457	20.5257
ENSGALG00000000104	1.70808	1.00599	1.48687	1.49517	1.6367	1.57079
ENSGALG00000000106	8.12089	6.9524	8.1847	6.98166	8.81535	7.29313
ENSGALG00000000107	0.36662	0.175675	0.214763	0.513336	0.330771	0.215211
ENSGALG00000000109	3.05204	2.52303	4.17327	4.76455	4.05569	4.32768
ENSGALG00000000112	0.267053	0.11321	0.453681	0.197528	0.679161	0.242317
ENSGALG00000000122	226.009	305.008	261.399	255.923	211.477	236.215
ENSGALG00000000129	20.5318	21.5245	24.8557	19.4087	20.8604	21.116
ENSGALG00000000137	59.0342	56.2822	51.0816	38.3561	68.8449	57.4527
ENSGALG00000000141	26.3814	20.5723	16.8287	34.8663	21.2905	15.0398
ENSGALG00000000142	26.7846	27.3506	38.8118	24.3677	26.5339	25.253
ENSGALG00000000146	10.0741	9.49636	9.5638	7.80075	11.0971	10.3121
ENSGALG00000000150	203.378	345.542	296.853	278.848	229.927	290.501
ENSGALG00000000151	4.93655	2.32766	3.92028	2.53317	4.55914	5.03941
ENSGALG00000000154	5.53876	7.02398	7.93828	5.04848	4.7945	4.18201
ENSGALG00000000156	55.7728	57.4492	51.1265	49.1127	55.1472	48.7214
ENSGALG00000000158	13.1083	16.7848	14.6674	19.6045	12.7652	12.4023
ENSGALG00000000161	6.52967	6.40732	9.29425	5.89638	9.5381	8.39142
ENSGALG00000000162	0.0331105	0.0821786	0.115552	0.235349	0.103599	0.0406553
ENSGALG00000000168	13.3744	5.47835	5.25979	3.39839	13.4528	6.64318
ENSGALG00000000184	6.57655	4.55334	7.58883	8.96962	7.80999	6.29384
ENSGALG00000000186	3.9934	3.60834	5.19069	3.97793	4.17609	3.98499
ENSGALG00000000189	4.37892	4.32213	6.90086	4.34985	3.84836	4.41266
ENSGALG00000000195	5.82121	5.35393	4.87073	6.52244	4.27047	4.95058
ENSGALG00000000201	7.25009	7.14451	6.44538	9.1747	7.07864	6.78217
ENSGALG00000000208	6.30651	7.84234	8.18638	10.8039	6.60196	6.78726
ENSGALG00000000209	21.4734	23.3057	19.536	29.1419	24.0689	19.0402
ENSGALG00000000215	6.56919	8.17181	11.2055	8.36036	5.60244	8.37672
ENSGALG00000000217	0.278744	0.325242	0.335548	0.327211	0.396087	0.336503
ENSGALG00000000218	16.3046	20.6844	22.5266	15.0324	21.0236	19.431
ENSGALG00000000220	7.51972	11.6977	9.31568	9.38567	5.51322	7.18174
ENSGALG00000000223	30.5121	31.5772	28.3919	26.5341	30.172	26.2325
ENSGALG00000000225	1.51863	1.6636	1.64792	2.46925	1.77851	1.81784
ENSGALG00000000226	1.02716	2.64232	2.74172	1.61551	1.60754	1.85145
ENSGALG00000000227	29.4133	24.5991	23.441	17.605	30.5865	25.6293
ENSGALG00000000233	5.66061	5.16078	5.27227	5.26324	5.75185	4.88432
ENSGALG00000000234	0.819316	0.850132	2.08564	1.01769	0.999432	0.964449
ENSGALG00000000235	25.9557	28.0504	40.5248	22.0346	28.8578	27.7855
ENSGALG00000000241	8.33817	8.12719	5.94475	3.3915	11.2964	10.6373
ENSGALG00000000242	0.0575998	0	1.39504	0.127002	0.0860774	0.209251
ENSGALG00000000243	9.02425	8.75726	9.22488	10.5314	9.55323	9.16276
ENSGALG00000000244	2.55829	1.12579	2.25307	1.50745	2.43316	1.99837
ENSGALG00000000247	8.58291	8.78356	8.06821	6.9862	10.583	9.72829
ENSGALG00000000251	0.0701818	0.0923205	0.0173859	0.124562	0.0915888	0.140692
ENSGALG00000000253	7.40177	10.6083	12.5727	10.5891	8.15101	8.7641
ENSGALG00000000255	28.2654	37.7791	28.5719	21.7455	22.0595	23.1133
ENSGALG00000000259	21.834	18.5161	25.8755	22.0594	21.5117	16.0941
ENSGALG00000000264	7.40383	8.25134	10.8565	8.50931	6.51123	6.84894
ENSGALG00000000273	5.27572	4.91622	4.73379	3.96808	5.04561	5.16348
ENSGALG00000000275	8.36204	8.39923	14.9506	8.10676	11.853	9.65185
ENSGALG00000000276	8.54505	8.19747	6.70829	7.51099	6.20853	6.9035
ENSGALG00000000277	0.195923	0.0898257	0.255019	0.661963	0.125231	0.20774
ENSGALG00000000280	1.55102	3.20682	3.09145	3.69643	4.46682	3.19889
ENSGALG00000000284	30.1177	26.4562	33.1415	13.2727	31.2494	27.6957
ENSGALG00000000296	9.95082	9.70564	9.49845	10.0642	7.92184	10.0297
ENSGALG00000000299	1.40344	2.1105	6.51505	0.834373	1.15332	1.1238
ENSGALG00000000302	0	0.0515813	0.114757	1.07982	0.0498319	0.298427
ENSGALG00000000309	0.139113	0.0542937	0.189328	0.141779	0.044989	0.0690564
ENSGALG00000000311	5.8541	9.30565	7.06957	7.06528	3.97932	5.63812
ENSGALG00000000313	2.07213	1.01077	0.903369	2.23129	1.87025	1.47655
ENSGALG00000000314	9.38045	17.462	40.476	10.406	10.4694	13.1031
ENSGALG00000000317	1.04001	1.14851	9.53836	0.374054	0.642602	1.85121
ENSGALG00000000318	286.121	182.81	180.63	166.799	269.683	213.15
ENSGALG00000000329	24.1366	21.9202	17.5922	18.3529	20.1562	20.6178
ENSGALG00000000336	40.2382	33.9511	35.354	43.0004	34.2189	33.3251
ENSGALG00000000337	3.70129	0	3.57696	0	3.69023	0
ENSGALG00000000349	61.0932	65.4235	55.8816	52.6153	56.4416	57.5631
ENSGALG00000000352	8.60024	9.5144	8.81494	8.99936	8.72851	8.5473
ENSGALG00000000357	0.44507	0.365433	0.379384	0.630294	0.244935	0.565517
ENSGALG00000000364	7.204	14.2356	7.57576	4.81221	6.38103	4.10319
ENSGALG00000000371	0	0	0.59212	0	0	0.0756834
ENSGALG00000000374	12.0144	11.8503	11.4326	15.1942	12.8205	10.9983
ENSGALG00000000377	63.0342	62.813	47.4963	46.1454	71.0198	60.0145
ENSGALG00000000378	5.17919	8.65617	5.46954	6.16289	4.78572	5.48971
ENSGALG00000000379	7.95914	6.61352	6.20077	4.2918	8.27769	7.69349
ENSGALG00000000390	7.20027	9.39945	12.8981	7.11467	8.38865	8.69481
ENSGALG00000000394	0.154043	0.349083	6.13705	0.174891	0.339115	0.378924
ENSGALG00000000396	8.22673	9.88655	12.5844	8.54758	10.0761	9.51207
ENSGALG00000000397	19.0908	18.6438	18.423	13.8708	19.8642	17.805
ENSGALG00000000399	0.438078	0.383083	0.0946337	0.267139	0.166133	0.328824
ENSGALG00000000400	0.0175713	0.0290407	1.17043	0.0879218	0.0425057	0.050048
ENSGALG00000000401	3.60353	4.00776	3.61532	2.83227	3.71839	3.76059
ENSGALG00000000402	40.5175	33.5784	39.1146	21.9074	41.1305	38.4241
ENSGALG00000000404	23.6822	30.4713	44.0324	23.8754	26.8378	29.2014
ENSGALG00000000407	7.19173	8.83073	8.55705	5.51039	9.51467	8.01999
ENSGALG00000000409	32.6762	42.1463	54.9326	39.3987	34.2985	35.4393
ENSGALG00000000410	8.08161	9.03965	12.5792	7.60166	9.20088	8.73077
ENSGALG00000000417	4.39899	4.01738	3.6773	3.60752	4.20828	4.22289
ENSGALG00000000419	51.7397	74.0877	68.3782	63.486	51.5372	62.4768
ENSGALG00000000424	66.9829	64.4355	63.7308	67.1804	74.4174	73.0932
ENSGALG00000000430	7.86474	8.38912	7.24205	6.77707	6.8493	8.26915
ENSGALG00000000433	0.454429	0.66488	1.20693	0.719435	0.556964	0.398558
ENSGALG00000000436	11.8095	15.1929	16.7408	20.9726	13.311	13.545
ENSGALG00000000438	6.18719	9.00125	11.638	5.7145	6.00421	5.48949
ENSGALG00000000442	2.10921	1.72659	4.15968	3.09329	2.5151	3.22795
ENSGALG00000000451	0.146503	0.237096	3.60555	0.242183	0.338505	0.373895
ENSGALG00000000452	6.41343	5.73596	4.55492	5.79644	4.24846	6.51023
ENSGALG00000000458	0.770519	0.185789	0.712378	0.894688	0.75681	0.214381
ENSGALG00000000461	84.982	50.3991	70.9059	42.5535	93.059	72.8229
ENSGALG00000000466	0.369182	0.196262	0.589021	0.516106	0.332679	0.268723
ENSGALG00000000470	61.2158	64.173	49.4403	31.4346	62.7316	60.3792
ENSGALG00000000474	408.801	483.075	421.442	413.072	448.3	560.588
ENSGALG00000000476	0.0737038	0.22218	0.245502	0.139224	0.214683	0.127709
ENSGALG00000000478	2.44904	1.6551	2.94153	1.66661	2.70528	2.01546
ENSGALG00000000497	0.958507	1.22004	0.47128	1.57183	0.595648	1.0006
ENSGALG00000000498	2.70547	2.78285	2.84385	2.31231	2.1321	3.1178
ENSGALG00000000504	0.401496	0.55651	0.706244	1.3862	0.38057	0.358587
ENSGALG00000000507	0.0624997	0.10636	0.0251673	0.0520366	0.0546926	0.153844
ENSGALG00000000510	8.2866	9.53768	10.7028	7.64651	7.89916	8.19753
ENSGALG00000000511	13.1747	15.3564	25.767	14.2128	13.2756	12.6629
ENSGALG00000000513	5.80881	6.046	6.82452	5.74797	5.96955	5.16432
ENSGALG00000000516	1.55046	1.65861	1.98612	0.919288	1.81482	1.54967
ENSGALG00000000518	10.413	9.58931	10.7548	9.53135	10.224	10.8361
ENSGALG00000000521	0.396212	0.122963	0.177764	0.103314	0.288326	0.364327
ENSGALG00000000523	8.85726	9.5643	12.7791	9.51395	10.049	8.52858
ENSGALG00000000525	13.1838	10.5113	11.8954	9.29825	12.4647	11.6916
ENSGALG00000000528	3.09352	5.70373	7.77539	6.37293	4.39217	6.52993
ENSGALG00000000529	23.1455	27.4642	20.8831	13.8874	29.7046	26.4884
ENSGALG00000000533	141.492	153.843	117.862	111.636	160.617	138.999
ENSGALG00000000535	11.4413	12.7733	12.7769	10.1027	10.2939	10.4377
ENSGALG00000000538	6.09215	7.63782	6.6459	8.4778	7.75616	6.18667
ENSGALG00000000540	2.34424	3.00145	3.96647	3.50625	2.546	3.32884
ENSGALG00000000541	16.4821	13.1617	19.7702	18.3238	17.8379	16.4377
ENSGALG00000000542	88.1736	138.455	134.141	156.174	66.8543	91.2823
ENSGALG00000000544	0.0750516	0.064997	0.351761	0.078379	0.0870499	0.0581323
ENSGALG00000000545	0.117599	0.171397	1.99126	0.124282	0.131635	0.227161
ENSGALG00000000549	0	0.141241	0.39952	0.936349	0	0.0810769
ENSGALG00000000550	16.9128	19.3553	18.905	18.8532	19.3288	18.2258
ENSGALG00000000551	10.6144	12.7553	15.7805	12.4909	11.388	12.7987
ENSGALG00000000557	1.24437	0.941424	0.967038	0.710068	1.28822	0.670059
ENSGALG00000000558	21.1211	16.162	9.79366	13.0708	13.4776	14.2801
ENSGALG00000000560	0.152451	0.17992	0.214385	0.636651	0.211157	0.37004
ENSGALG00000000564	14.3037	17.3371	16.9951	16.114	17.3109	16.6652
ENSGALG00000000573	1.27631	0.643985	1.42886	1.10733	1.2292	1.13043
ENSGALG00000000576	1.81992	1.95872	2.79285	1.75162	1.41474	2.08892
ENSGALG00000000577	17.2962	17.1123	20.4894	17.7589	19.3367	18.3027
ENSGALG00000000579	101.377	130.124	132.196	120.058	99.2463	104.798
ENSGALG00000000581	17.0838	14.4924	15.9862	18.8274	17.6847	17.0144
ENSGALG00000000583	0.859797	0.968271	0.849406	0.611631	1.05787	0.90127
ENSGALG00000000584	3.49673	1.09317	2.39655	2.01789	3.07051	3.53646
ENSGALG00000000585	10.7794	10.0927	18.2463	10.2455	15.1951	14.6983
ENSGALG00000000589	1.39511	0.969101	0.979567	1.65491	1.46747	0.895025
ENSGALG00000000596	18.6068	20.9207	30.1773	17.9182	20.2954	20.0526
ENSGALG00000000599	12.4117	13.7336	12.3461	11.7859	9.24689	13.7236
ENSGALG00000000603	11.5876	10.4615	11.094	11.1416	10.9567	10.6201
ENSGALG00000000604	2.40719	2.1761	2.68938	1.8752	3.90194	3.84243
ENSGALG00000000606	22.1991	20.386	17.6631	21.6739	19.8025	17.7963
ENSGALG00000000607	0.775622	0.609939	0.870538	0.530667	0.865349	0.922878
ENSGALG00000000608	0.384475	0.524028	1.09887	1.56939	0.825152	0.375463
ENSGALG00000000611	16.2592	15.8614	18.0653	13.7154	16.6777	14.624
ENSGALG00000000613	70.3628	80.5332	109.046	63.302	79.9415	73.8283
ENSGALG00000000615	17.6466	21.8404	19.5205	17.0069	23.7046	19.4085
ENSGALG00000000616	1.20117	7.46188	6.00696	9.02741	2.59975	4.66237
ENSGALG00000000618	8.99463	9.6395	15.5094	9.59147	8.52543	8.44294
ENSGALG00000000619	5.02059	9.06171	8.05813	9.19092	6.41034	7.88591
ENSGALG00000000621	32.8148	24.8771	34.9997	29.5689	33.5189	31.0989
ENSGALG00000000625	6.29	5.27022	6.14718	6.62048	6.91849	7.21933
ENSGALG00000000627	18.3852	20.6654	29.4939	17.5363	20.3994	20.4873
ENSGALG00000000629	69.8189	86.2169	74.9121	76.2146	53.2645	76.9579
ENSGALG00000000632	14.0508	16.4631	22.2399	11.0234	17.2636	13.8967
ENSGALG00000000636	17.1913	13.7365	22.3109	15.9411	15.4265	17.3029
ENSGALG00000000637	4.13559	3.87645	5.18216	4.56969	4.74399	4.24035
ENSGALG00000000638	13.9064	15.4715	13.1937	12.0432	15.3922	13.0801
ENSGALG00000000639	0.243112	0.119993	0.114421	0.0712513	0.147706	0.0699028
ENSGALG00000000643	4.42818	3.99249	3.56246	3.29875	5.12538	4.16961
ENSGALG00000000645	0.155015	0.0668702	0.184527	0.14341	0	0
ENSGALG00000000650	42.827	55.271	49.1364	42.9724	51.5577	47.3226
ENSGALG00000000652	25.1614	16.6891	18.0922	13.0569	23.0749	20.0178
ENSGALG00000000654	0.655406	0.211776	0.460001	0.465509	0.208733	0.2666
ENSGALG00000000657	15.2666	16.664	24.4625	18.4142	17.9682	16.6484
ENSGALG00000000660	57.5034	64.9655	74.2945	51.7762	61.9986	65.1197
ENSGALG00000000667	2.91243	4.84897	8.27164	5.32636	3.47404	2.00235
ENSGALG00000000668	16.5575	17.273	20.7474	18.3713	18.4754	16.3504
ENSGALG00000000669	22.254	19.48	14.658	18.9048	20.1503	18.3153
ENSGALG00000000672	7.16963	7.6113	8.5737	7.55851	6.64511	7.65005
ENSGALG00000000674	9.84764	8.98126	7.04241	10.8976	9.05738	9.56725
ENSGALG00000000678	45.6582	103.358	104.034	71.8897	48.326	77.4089
ENSGALG00000000681	9.5988	12.1914	9.86019	11.123	7.71879	8.59295
ENSGALG00000000684	8.19408	3.24252	6.85268	1.67789	5.5592	6.41406
ENSGALG00000000685	7.17369	5.31767	5.02501	6.40171	7.57941	6.30081
ENSGALG00000000690	0.660739	0.804843	0.206416	0.662176	0.571348	0.605346
ENSGALG00000000692	4.58258	3.31339	4.42871	2.39826	3.09092	4.58532
ENSGALG00000000693	16.2798	23.698	21.1462	23.6469	16.853	16.442
ENSGALG00000000695	2.62939	2.47658	2.33228	2.07032	2.3289	2.35144
ENSGALG00000000699	8.99363	10.758	14.052	9.9106	9.05305	8.69682
ENSGALG00000000703	8.97991	7.17006	8.80751	6.35481	7.40172	7.58849
ENSGALG00000000707	75.7642	75.729	69.1898	57.8357	83.3113	75.3986
ENSGALG00000000708	51.9544	51.5512	50.2418	33.9503	55.7376	48.1485
ENSGALG00000000712	10.8481	11.0574	14.7859	12.1829	10.9544	12.2101
ENSGALG00000000713	4.45363	3.70008	3.22121	3.71154	3.94171	4.03434
ENSGALG00000000719	267.709	277.778	236.349	326.968	308.18	297.933
ENSGALG00000000720	6.48555	7.8341	4.80098	6.40391	6.29649	5.56965
ENSGALG00000000721	5.98974	5.55183	9.96154	5.19843	6.68458	6.02439
ENSGALG00000000723	30.3547	35.1255	52.9294	34.8638	31.9409	32.5091
ENSGALG00000000724	13.108	14.6326	20.4326	14.9833	13.6517	15.5145
ENSGALG00000000726	67.5632	62.2734	60.1764	57.1562	66.6371	65.7142
ENSGALG00000000729	9.21088	11.1699	8.98551	8.53032	9.98023	10.4381
ENSGALG00000000731	0.691502	1.37073	0.48526	2.61099	0.54852	0.535819
ENSGALG00000000734	26.7958	35.1062	31.6346	21.0616	29.4493	28.0418
ENSGALG00000000736	0.903226	1.09724	0.250135	1.34161	0.210568	0.506677
ENSGALG00000000737	4.91451	4.96211	5.26449	6.51264	4.93965	3.5855
ENSGALG00000000740	5.98214	6.72931	5.88513	6.41485	5.00799	5.79345
ENSGALG00000000747	1.97657	1.1831	1.43432	1.79005	1.93051	1.82425
ENSGALG00000000748	0.942519	0.901766	1.48642	1.59182	1.04782	1.05924
ENSGALG00000000751	27.4344	28.668	34.2152	28.969	31.4912	27.0444
ENSGALG00000000755	13.8475	20.5033	16.676	14.386	13.3896	13.9098
ENSGALG00000000761	8.97653	8.1251	5.31451	3.2371	10.5373	9.36867
ENSGALG00000000764	159.055	196.241	148.989	183.994	180.855	152.486
ENSGALG00000000769	2.83357	2.65308	3.19808	1.86917	2.93744	2.87656
ENSGALG00000000775	25.0397	56.895	35.5837	123.889	23.6415	18.6082
ENSGALG00000000776	8.29437	6.78805	9.44483	9.5463	8.66955	7.95668
ENSGALG00000000777	14.6353	14.2908	16.2083	13.6023	16.4137	14.0904
ENSGALG00000000783	1.56454	2.46284	1.61545	6.26212	1.17593	1.46822
ENSGALG00000000784	17.3005	19.9269	19.5685	19.7156	18.2772	17.6341
ENSGALG00000000785	13.2466	14.2266	10.802	16.9535	11.1295	13.3611
ENSGALG00000000787	16.3144	15.5817	13.2173	13.7801	16.5989	15.02
ENSGALG00000000790	43.1189	54.8314	59.6489	45.7669	49.06	46.6166
ENSGALG00000000791	16.5545	17.4452	17.1359	8.8229	22.4411	18.1669
ENSGALG00000000793	43.3119	59.1041	46.4495	41.8892	51.0384	51.4275
ENSGALG00000000795	23.7393	35.2352	29.135	36.3867	27.1351	24.217
ENSGALG00000000802	14.2842	12.6975	10.6377	10.1141	14.4565	13.2893
ENSGALG00000000803	1.15391	4.04243	43.1036	3.25265	2.48728	3.44539
ENSGALG00000000811	38.106	39.9547	39.7274	43.5149	43.3159	44.0282
ENSGALG00000000812	547.243	718.369	617.384	670.967	582.893	620.969
ENSGALG00000000814	57.6925	60.9003	49.8932	51.55	66.3173	58.1698
ENSGALG00000000816	3.60188	2.74397	4.46939	3.14921	4.07207	3.78693
ENSGALG00000000817	11.3375	7.30709	9.91689	19.6739	12.9624	14.1536
ENSGALG00000000818	16.0564	14.689	12.5464	14.9626	11.4183	14.4305
ENSGALG00000000820	1.27729	0.629051	1.20924	1.53994	0.782318	1.26735
ENSGALG00000000824	0.502	0.987655	17.6263	0.918053	0.794344	1.19334
ENSGALG00000000830	0.969421	0.975523	0.99845	0.981541	1.086	0.22828
ENSGALG00000000835	25.6462	29.7456	37.9687	21.9701	24.9679	25.3833
ENSGALG00000000836	0.44817	0.549815	0.529089	0.309614	0.337491	0.465173
ENSGALG00000000838	3.8731	3.23228	4.58443	2.98396	3.82229	3.05285
ENSGALG00000000839	0.0721171	0	0.0687603	0.0670911	0.1158	0.476892
ENSGALG00000000843	7.09442	7.03017	6.02746	5.61742	6.80751	7.36841
ENSGALG00000000845	6.18562	5.53156	10.7915	5.4836	5.80869	5.9215
ENSGALG00000000847	15.9905	14.8441	15.931	16.284	16.336	16.7239
ENSGALG00000000848	26.5739	30.5958	35.7911	22.832	30.2218	30.4801
ENSGALG00000000853	8.86579	6.24502	7.0495	8.23737	8.82767	8.85714
ENSGALG00000000855	26.6619	30.0697	25.3986	25.6675	27.0342	26.7272
ENSGALG00000000856	11.8661	13.377	12.9449	10.4782	12.4164	12.7787
ENSGALG00000000857	18.6997	20.9388	19.5354	16.9919	20.4534	20.325
ENSGALG00000000862	4.9355	5.34354	6.91586	6.88446	3.65124	4.78839
ENSGALG00000000863	3.88534	4.39279	4.73801	4.84232	3.59055	4.35939
ENSGALG00000000864	12.5997	13.4787	12.9794	11.4116	12.6765	13.7228
ENSGALG00000000866	21.2518	23.9984	33.8482	24.4084	20.7932	21.6222
ENSGALG00000000868	18.6129	22.2299	19.7746	15.6784	21.1477	20.5123
ENSGALG00000000870	0.730158	1.09097	1.5739	0.848884	0.948613	1.53998
ENSGALG00000000871	0.150016	0	0.122	0.124473	0.322857	0
ENSGALG00000000875	7.56384	6.8591	8.22529	6.23423	7.17782	7.78461
ENSGALG00000000881	3.14727	3.64845	4.37269	4.4159	3.30466	2.09034
ENSGALG00000000883	55.4573	55.5877	47.2605	51.7066	58.8223	49.8446
ENSGALG00000000884	18.3649	17.2379	17.8373	13.3126	18.7392	22.8393
ENSGALG00000000887	0.581877	0.256182	0.2665	0.378863	0.27219	0.626998
ENSGALG00000000891	7.78072	7.15432	9.94019	7.86341	8.83999	7.78682
ENSGALG00000000893	0.0402679	0.179058	3.297	0.0842548	0.275969	0.304363
ENSGALG00000000895	56.5037	68.3917	72.5234	60.5891	65.9951	67.1727
ENSGALG00000000901	0.0372608	0.0500503	2.87277	0	0	0.0935267
ENSGALG00000000902	1.37026	2.30531	6.92675	3.01088	1.09999	1.76411
ENSGALG00000000903	29.2703	27.5688	27.2563	24.3108	28.6876	30.0778
ENSGALG00000000905	188.636	234.257	191.505	158.292	194.706	188.489
ENSGALG00000000906	1.95934	1.4831	3.43052	3.02383	1.53254	2.11126
ENSGALG00000000907	74.407	79.5104	79.2507	63.2722	78.2106	82.8966
ENSGALG00000000908	8.55848	4.38875	7.1217	7.56543	9.3975	7.05485
ENSGALG00000000909	0.464939	0.347098	0.212973	0.234663	0.393333	0.465599
ENSGALG00000000913	15.3637	16.5479	15.8017	18.89	15.4139	16.4708
ENSGALG00000000918	0.285972	0.311574	0.301798	1.116	0.539138	0.822442
ENSGALG00000000920	0.480092	0.989104	1.89009	1.24066	0.463957	0.64576
ENSGALG00000000927	28.0851	17.7686	24.935	13.4646	26.8903	28.9709
ENSGALG00000000934	4.42847	5.1725	5.22707	4.79881	4.28147	5.57705
ENSGALG00000000943	19.1522	20.2526	24.7682	16.3266	18.8452	18.013
ENSGALG00000000944	63.4628	57.4496	50.6733	64.051	53.9697	48.7413
ENSGALG00000000946	109.652	114.963	99.6428	109.41	106.532	130.258
ENSGALG00000000949	3.11712	4.27395	6.32317	4.79584	3.17807	2.74703
ENSGALG00000000950	23.8417	18.028	18.637	23.2362	25.2828	26.525
ENSGALG00000000955	24.4717	23.5986	30.0087	20.0498	23.2825	19.4966
ENSGALG00000000962	5.98341	5.43642	7.11266	5.60785	5.45848	6.32012
ENSGALG00000000966	2.69371	2.6291	3.05702	2.92123	2.55411	2.62147
ENSGALG00000000972	16.5534	14.3716	20.6143	14.84	21.5994	17.094
ENSGALG00000000975	13.7554	12.4948	16.5151	12.8732	14.9009	15.6754
ENSGALG00000000977	10.1141	10.298	9.18634	9.89572	10.618	10.0045
ENSGALG00000000978	5.56669	5.85897	8.77902	4.91464	7.18794	7.17544
ENSGALG00000000988	28.3439	28.9144	29.3	24.135	26.1974	25.2066
ENSGALG00000000990	169.861	102.01	122.741	153.184	187.604	165.754
ENSGALG00000000991	27.8713	36.9208	34.1595	31.6775	35.0214	36.0003
ENSGALG00000000993	11.525	10.726	20.3921	15.6168	11.8675	13.6164
ENSGALG00000000994	0.207064	0.123601	0.233722	0.353233	0.399645	0.729868
ENSGALG00000000996	18.9788	21.6127	24.0998	15.8144	20.2045	18.0268
ENSGALG00000000997	11.0522	8.56355	10.4623	6.39123	11.0579	12.8075
ENSGALG00000000998	18.1369	18.2936	21.1801	15.5892	19.6258	17.2619
ENSGALG00000000999	12.133	13.1527	12.0877	10.0935	10.8018	11.3453
ENSGALG00000001000	357.749	556.896	765.89	318.271	486.757	478.839
ENSGALG00000001003	39.5881	33.2131	29.6932	28.2251	34.2559	29.1815
ENSGALG00000001006	1.18847	1.53141	4.95033	1.56742	1.0316	1.29747
ENSGALG00000001013	20.439	20.522	19.4508	17.3507	20.0851	18.7058
ENSGALG00000001014	8.39234	7.78756	8.56344	9.0551	8.76	8.25843
ENSGALG00000001017	6.006	5.65948	13.028	6.18298	6.0319	7.1118
ENSGALG00000001019	13.6713	16.8229	21.6238	14.8871	15.4925	15.1124
ENSGALG00000001021	5.9999	4.20922	4.21905	5.89613	6.05217	5.47458
ENSGALG00000001022	9.01307	10.3725	12.4062	9.83592	9.47984	9.68071
ENSGALG00000001024	69.5364	79.7949	88.9527	87.4718	78.6066	85.4365
ENSGALG00000001025	8.61436	9.14234	6.85415	8.38386	8.1801	8.36386
ENSGALG00000001028	0.737712	1.00889	0.975874	0.785394	0.484086	1.04065
ENSGALG00000001030	62.6845	69.0875	52.1318	46.6939	59.8061	53.7097
ENSGALG00000001031	0.375291	0	0.242218	0.117127	0.0856656	0.203745
ENSGALG00000001034	25.8882	27.8715	27.3326	22.9907	26.2897	28.8918
ENSGALG00000001035	0.066818	0.0843037	0.121517	0.124001	0.3082	0.164281
ENSGALG00000001036	8.26847	9.0787	9.37391	7.47055	9.34269	8.83172
ENSGALG00000001037	3.77791	3.04877	5.26586	3.08466	4.03801	4.08923
ENSGALG00000001038	18.2118	14.1842	13.7802	17.0217	17.321	14.0585
ENSGALG00000001042	13.5862	15.0354	15.2605	11.0057	12.0847	14.1633
ENSGALG00000001043	7.48044	7.83408	13.1071	7.94167	7.99327	7.69409
ENSGALG00000001046	26.0038	23.1916	33.6955	23.4694	30.4032	28.3419
ENSGALG00000001048	21.5966	17.9155	15.2705	18.9403	23.7318	17.4731
ENSGALG00000001049	8.35253	10.4668	10.1323	9.75306	8.54697	9.33223
ENSGALG00000001051	35.7806	28.5332	32.0151	28.0299	35.653	33.1318
ENSGALG00000001054	33.6411	39.6689	37.4456	31.5369	42.0635	38.4321
ENSGALG00000001055	17.5236	17.7929	20.0109	14.675	18.5441	19.0085
ENSGALG00000001056	2.35897	2.54739	5.14897	3.40739	2.48657	3.19148
ENSGALG00000001058	1.41277	1.13159	2.31626	1.87024	1.47781	1.48119
ENSGALG00000001062	0.624089	0.48868	0.799812	1.14597	0.501769	0.39578
ENSGALG00000001067	13.791	12.5346	11.8316	11.4312	14.0745	13.8874
ENSGALG00000001073	1.86449	1.7276	2.00504	1.9753	1.2866	1.93795
ENSGALG00000001076	5.11714	4.70614	6.48973	5.177	5.04894	4.87627
ENSGALG00000001080	65.8554	94.8412	49.1311	75.138	60.9326	80.8184
ENSGALG00000001084	0.541066	0.488603	0.833594	0.615851	0.347649	0.35929
ENSGALG00000001091	0.811136	0.84217	0.320549	1.33707	0.127191	0.566641
ENSGALG00000001093	25.3287	23.8166	20.7279	18.5952	25.9708	22.0251
ENSGALG00000001094	1.47813	2.06875	1.88487	1.19904	0.764906	0.692953
ENSGALG00000001096	69.4364	97.4626	80.8702	86.4812	71.0282	88.6892
ENSGALG00000001099	7.96986	7.56782	10.9954	6.83087	7.92019	8.39586
ENSGALG00000001101	16.6363	20.8249	14.2878	20.8448	20.3383	14.4596
ENSGALG00000001103	87.1384	91.3684	84.2033	72.4398	86.0089	98.4304
ENSGALG00000001107	16.433	18.9574	19.4489	17.3498	18.3897	18.9489
ENSGALG00000001108	4.26204	4.63041	3.93406	3.82587	4.69116	3.60117
ENSGALG00000001109	2.41378	14.8171	27.8613	20.1183	8.12324	13.2608
ENSGALG00000001110	5.86618	6.66122	6.73333	5.97058	6.44121	7.45023
ENSGALG00000001111	0.0489004	0.0256907	0.121404	0.0969536	0.0125993	0.133626
ENSGALG00000001115	2.45341	1.79764	1.76329	5.9158	2.03165	3.02856
ENSGALG00000001117	4.99975	5.70184	3.71553	4.69097	5.68039	5.3179
ENSGALG00000001118	71.6912	68.2939	57.9873	57.9815	84.1616	68.7099
ENSGALG00000001121	25.4885	25.7239	22.7801	22.3279	23.5456	22.8131
ENSGALG00000001122	0.749473	0.396065	0.114114	0.0386759	0.0821467	0.0467567
ENSGALG00000001124	0.213814	0.0703666	0.19824	0.132798	0.103261	0
ENSGALG00000001126	5.9337	6.79565	10.1716	4.62943	6.40609	5.15019
ENSGALG00000001130	4.14283	4.06545	13.173	2.69395	7.28325	6.54793
ENSGALG00000001136	0.719116	0.281912	0.534129	1.23016	0.794687	1.01161
ENSGALG00000001141	0.383117	0	0	0.0695641	0.106312	0.17351
ENSGALG00000001143	14.8204	14.2558	12.0313	9.30016	15.2244	16.7091
ENSGALG00000001144	3.28273	3.26288	4.39508	2.583	3.63646	3.96081
ENSGALG00000001146	8.09731	8.46808	10.5524	7.98954	8.08011	9.30211
ENSGALG00000001149	0.122178	0.171279	0.182332	0.413964	0.24317	0.0373688
ENSGALG00000001153	2.79476	2.51693	2.21993	2.36455	2.72897	2.66191
ENSGALG00000001157	11.2542	9.76867	9.45831	9.39848	11.0532	10.1779
ENSGALG00000001158	4.10237	3.97444	5.00225	4.92039	4.42585	3.96384
ENSGALG00000001161	8.65407	8.09847	9.01053	8.97807	9.42909	8.05052
ENSGALG00000001163	17.1405	14.9797	19.0636	13.9471	18.2206	14.5872
ENSGALG00000001165	4.15816	4.1133	4.53331	4.23702	4.72518	4.83606
ENSGALG00000001168	24.8189	28.625	23.9704	27.3267	27.2818	27.4223
ENSGALG00000001169	12.7978	14.343	14.1108	17.1693	10.4738	13.613
ENSGALG00000001171	1.04839	0.855452	2.36187	0.994552	0.73101	0.932993
ENSGALG00000001172	0.133029	0.211154	0.402414	0.418369	0.103878	0.088119
ENSGALG00000001174	5.3256	5.74965	9.06863	5.85803	5.83947	5.8768
ENSGALG00000001175	44.1435	59.7063	52.3829	58.9663	39.3437	37.5258
ENSGALG00000001177	21.26	19.7229	16.5804	11.162	21.5918	22.0443
ENSGALG00000001181	2.47754	2.55016	2.202	1.74325	3.27771	2.73193
ENSGALG00000001182	8.7318	7.5998	8.16365	7.61019	7.68327	7.5605
ENSGALG00000001183	99.5479	58.911	72.3118	51.0349	102.232	87.0746
ENSGALG00000001184	30.3241	41.3	35.1129	39.5153	32.3285	34.9204
ENSGALG00000001189	1.09457	1.30904	0.547825	2.31443	0.724928	0.711068
ENSGALG00000001191	0.542257	0.0620427	0.0974977	0.197641	0.0809179	0.156087
ENSGALG00000001201	20.114	23.8312	23.9792	21.7821	24.1232	22.9743
ENSGALG00000001203	0	0	0.234151	0.155223	0.0820968	0.157791
ENSGALG00000001204	4.44479	5.47558	5.97708	4.25414	4.58056	3.46899
ENSGALG00000001206	0.369147	0.457607	5.49088	0.278478	0.304203	0.503058
ENSGALG00000001207	0.666023	2.40694	1.76835	1.74981	1.04184	0.696969
ENSGALG00000001209	0.333991	0	0.592372	0	0.208829	0.199048
ENSGALG00000001214	0.540524	1.00662	0.634421	0.17911	0.436796	0.395359
ENSGALG00000001219	13.7281	13.8159	12.4375	12.6921	13.7328	14.295
ENSGALG00000001220	29.2127	57.2065	55.7334	31.2965	44.0679	36.6985
ENSGALG00000001223	14.7174	16.469	17.1562	14.9644	16.0938	14.7258
ENSGALG00000001225	12.9761	16.0618	14.2045	14.6818	13.2847	13.2287
ENSGALG00000001229	11.2829	8.96175	8.48344	8.37739	9.67392	10.0512
ENSGALG00000001231	9.73057	9.5711	8.77532	9.25729	9.44328	9.75716
ENSGALG00000001235	0.0306157	0.0513528	0.367065	0.0253536	0.0405859	0.0990821
ENSGALG00000001238	14.9612	17.9603	17.987	16.3006	15.7508	16.6438
ENSGALG00000001239	1.96546	1.88509	4.13139	2.52101	1.72116	1.71446
ENSGALG00000001244	0.299973	0.330409	1.09647	0.618551	0.694883	0.51809
ENSGALG00000001245	9.82481	11.8661	11.9231	13.3911	9.75383	10.8152
ENSGALG00000001250	237.552	281.922	213.43	240.873	229.503	221.131
ENSGALG00000001252	0.304607	0.0569766	0.14309	0.182159	0.330928	0.132058
ENSGALG00000001253	10.2573	12.9694	10.9735	12.214	8.13531	10.7494
ENSGALG00000001256	1.24407	1.03342	1.16113	1.42949	1.4697	1.57749
ENSGALG00000001258	23.1742	21.0032	20.2825	27.8501	21.4347	18.1596
ENSGALG00000001262	96.6639	71.2361	78.8105	49.2567	94.1694	88.6117
ENSGALG00000001263	1.00342	0.614489	0.921131	0.535072	1.36587	0.612836
ENSGALG00000001264	8.64909	14.0967	9.79323	10.4246	10.0147	10.6253
ENSGALG00000001267	19.03	20.1457	21.6589	14.4393	17.2138	17.5798
ENSGALG00000001270	2.2275	2.4041	5.06143	3.03147	2.12873	2.75694
ENSGALG00000001273	0	0	0.943973	0	0	0.163426
ENSGALG00000001275	23.0745	23.5675	26.7672	19.6367	24.3986	23.2795
ENSGALG00000001276	1.85632	0.074495	2.70271	0.405744	0.20672	0.748352
ENSGALG00000001279	13.2274	10.474	11.4653	10.1438	12.5338	12.0899
ENSGALG00000001282	1.76804	1.45245	1.79702	1.13467	1.11637	0.686973
ENSGALG00000001283	34.2976	29.7927	28.2734	37.0353	38.2923	33.3697
ENSGALG00000001288	0.464177	0.604649	2.48308	1.02855	0.635628	0.617502
ENSGALG00000001289	2.00162	1.4645	2.66658	2.07473	1.65878	1.91846
ENSGALG00000001299	0	0.133148	0.350067	0.180202	0.184737	0
ENSGALG00000001304	1.81285	1.65347	2.15455	2.67555	1.49414	2.18175
ENSGALG00000001306	5.5218	6.00911	6.22898	5.76541	5.6726	5.33812
ENSGALG00000001309	9.00571	10.6759	16.3434	10.1963	8.96104	9.40452
ENSGALG00000001310	2.12668	2.3999	2.82067	2.44195	2.54135	2.53625
ENSGALG00000001311	0.434423	0.236516	0.917469	0.401483	0.289024	0.441887
ENSGALG00000001313	132.285	139.67	134.777	97.4516	141.769	129.79
ENSGALG00000001314	18.988	8.55323	8.47118	10.5422	17.5825	10.0037
ENSGALG00000001315	6.42384	7.3494	8.07032	7.30887	7.68975	5.57052
ENSGALG00000001316	9.59634	6.39518	9.75071	6.42126	7.12122	7.64593
ENSGALG00000001317	26.6279	32.0112	38.5267	23.5555	27.2138	30.1243
ENSGALG00000001319	0.24055	0.28402	0.527492	0.24662	0.297154	0.63056
ENSGALG00000001328	212.02	279.382	205.111	270.712	224.458	244.761
ENSGALG00000001329	2.14354	2.28583	2.11738	3.47115	1.9989	1.8315
ENSGALG00000001330	76.6276	119.013	91.3207	94.1472	98.7237	111.438
ENSGALG00000001331	9.287	22.564	12.8486	9.723	12.731	9.87773
ENSGALG00000001332	7.38441	4.61488	4.9357	2.81152	6.90145	5.34882
ENSGALG00000001333	10.6567	10.1474	10.5365	13.2171	12.3203	9.94625
ENSGALG00000001334	182.598	192.179	172.324	155.899	191.305	188.917
ENSGALG00000001335	39.4108	41.8348	44.8486	45.5055	41.4083	43.9635
ENSGALG00000001341	6.03046	6.40486	6.40622	5.66697	5.31121	5.10534
ENSGALG00000001342	0.606612	0.589024	0.949934	0.396114	0.597378	0.532881
ENSGALG00000001343	0.21378	0.35755	0.408487	0.486799	0.146434	0.0690712
ENSGALG00000001347	0.976076	0.927457	1.58176	1.08045	1.16264	1.11264
ENSGALG00000001350	7.20899	5.54746	7.47838	6.74299	6.87415	6.57063
ENSGALG00000001362	16.0001	16.2404	15.3686	19.4481	14.4661	15.5124
ENSGALG00000001363	6.29073	6.25043	6.52757	4.29848	8.35118	6.46027
ENSGALG00000001364	67.8679	80.5311	72.2105	68.5217	73.7221	64.9082
ENSGALG00000001366	3.5324	2.79605	5.7244	4.40422	4.37801	3.76678
ENSGALG00000001369	0.0441142	0.0572312	0.13548	0.192127	0	0.13665
ENSGALG00000001370	4.81975	8.64793	11.7189	5.58194	6.58806	8.47013
ENSGALG00000001371	22.133	43.568	23.4933	4.57728	12.4479	13.4282
ENSGALG00000001373	0.380573	0.449655	0.226793	0.932795	0.571215	0.472358
ENSGALG00000001374	26.2918	20.4582	20.0986	23.0815	27.0421	25.8205
ENSGALG00000001375	12.7976	15.2053	16.0058	13.8564	14.0364	14.1194
ENSGALG00000001376	5.84391	4.73813	7.01324	5.02962	6.36393	5.69917
ENSGALG00000001377	8.10218	8.66155	7.81022	6.14145	8.64933	7.025
ENSGALG00000001382	14.9063	13.583	13.1254	13.8246	17.2735	15.3333
ENSGALG00000001383	0.078567	0	0	0.0887473	0.151799	0.0902672
ENSGALG00000001387	2.06281	2.30135	1.86733	1.24053	2.67502	2.25655
ENSGALG00000001389	1.98724	2.06558	4.72041	2.42946	2.08554	2.52853
ENSGALG00000001391	0.278054	0.0847175	0	0.253659	0.554675	0
ENSGALG00000001392	16.672	7.84541	10.0239	7.98085	16.1578	15.2717
ENSGALG00000001394	14.1211	15.8983	16.2113	15.533	13.5342	13.5762
ENSGALG00000001405	4.09194	6.98987	36.5862	9.69291	5.8129	5.92828
ENSGALG00000001407	40.8804	74.6045	24.8287	48.2779	37.2923	46.1816
ENSGALG00000001409	0.178106	0.0308493	0.148041	0.12286	0.0573267	0.056643
ENSGALG00000001410	0.190117	0.254257	0.327194	0.233558	0.300305	0.206569
ENSGALG00000001412	21.2474	30.0142	28.7528	21.6224	16.6667	26.8421
ENSGALG00000001416	0.554676	0.257547	0.275207	0.312383	0.362516	0.256545
ENSGALG00000001418	0.0666635	0.119419	3.85247	0.0685389	0.0283817	0.166404
ENSGALG00000001419	13.2667	10.7184	16.9532	9.52507	14.9017	13.2954
ENSGALG00000001420	12.3151	12.0859	14.0699	9.75704	11.4673	11.7718
ENSGALG00000001425	4.90134	4.6978	10.2585	4.4833	5.43175	4.94968
ENSGALG00000001428	27.5161	36.0582	38.384	37.0106	29.8694	31.5571
ENSGALG00000001429	9.30053	10.9576	13.7246	10.5113	10.4788	11.1431
ENSGALG00000001433	1.96222	1.41657	2.42126	2.83586	1.99564	2.09654
ENSGALG00000001434	12.3592	7.28273	10.1351	7.07621	7.71113	10.1602
ENSGALG00000001437	5.80043	2.65171	2.22713	1.51424	6.89264	4.41114
ENSGALG00000001439	7.33671	8.11045	9.36463	7.18251	8.7807	8.09465
ENSGALG00000001441	28.0771	34.9151	45.121	31.1751	34.6783	30.3356
ENSGALG00000001442	0.598882	0.727324	0.692669	0.611033	0.670155	0.958735
ENSGALG00000001445	3.50647	3.72465	4.36909	3.61787	6.93593	7.3462
ENSGALG00000001446	32.6418	21.808	27.8037	26.113	29.4856	29.6749
ENSGALG00000001449	18.1468	22.5742	13.4875	20.2974	18.3207	14.7202
ENSGALG00000001450	0.172634	0.215081	0.599508	0.0924764	0.149606	0.225069
ENSGALG00000001452	89.9847	106.763	102.404	83.2591	92.4737	101.18
ENSGALG00000001459	1.95567	1.69669	2.51097	1.48824	1.86606	1.46009
ENSGALG00000001462	0.216604	0.0319579	0.152309	0.150364	0.0311692	0.1224
ENSGALG00000001463	3.95784	4.12357	3.56504	5.04041	4.81795	4.23577
ENSGALG00000001465	623.142	939.738	664.712	970.288	746.597	865.242
ENSGALG00000001467	11.1918	13.2219	19.5462	10.5345	10.6776	13.4263
ENSGALG00000001470	17.1201	18.8474	13.737	12.0831	15.75	12.7072
ENSGALG00000001472	49.8784	43.1878	46.1542	55.2046	43.4899	47.0054
ENSGALG00000001473	12.0046	12.4879	8.691	12.0014	11.1462	11.522
ENSGALG00000001474	59.4358	64.1232	83.524	55.3966	64.6499	62.6156
ENSGALG00000001475	160.205	229.189	220.888	166.714	220.79	196.802
ENSGALG00000001476	56.4023	62.8744	57.9552	63.6961	60.1126	73.3849
ENSGALG00000001479	8.04016	8.33774	14.3937	7.99952	8.6074	9.19962
ENSGALG00000001480	0.730561	0.703716	1.70946	1.26932	1.00846	1.37694
ENSGALG00000001483	15.9764	12.7395	17.2782	9.78619	18.0373	16.0192
ENSGALG00000001486	0.194587	0.256854	0.157204	0.0862162	0.310445	0.199783
ENSGALG00000001489	22.6575	26.87	24.8751	23.9051	24.3028	20.7404
ENSGALG00000001491	7.19904	8.04999	9.27626	3.5427	8.03774	7.37543
ENSGALG00000001492	40.1266	51.0365	47.8254	34.9875	42.7792	41.0345
ENSGALG00000001501	54.1246	56.6685	57.8928	42.8341	52.0868	54.6647
ENSGALG00000001502	25.3318	23.2031	24.1985	19.3914	31.1979	31.8853
ENSGALG00000001503	11.5542	11.9622	16.6734	10.2709	13.1682	12.9496
ENSGALG00000001504	6.48661	7.77058	13.6096	6.49728	7.66442	7.29488
ENSGALG00000001506	38.2738	57.1835	55.8287	53.9795	40.8246	46.3371
ENSGALG00000001513	1.99264	1.89767	2.41979	1.95602	2.34382	2.00687
ENSGALG00000001521	17.9695	20.4895	20.3207	15.7278	20.6072	16.5616
ENSGALG00000001522	7.22521	6.43776	7.90801	6.36329	7.13416	7.19387
ENSGALG00000001525	18.4853	18.1275	20.7181	18.1224	17.2796	17.9621
ENSGALG00000001527	11.756	7.54118	9.66494	4.17553	11.0715	9.85697
ENSGALG00000001529	24.4692	33.2257	31.6677	24.5323	30.4661	30.4617
ENSGALG00000001531	1.2329	0.854046	2.80037	0.971295	1.15009	1.02159
ENSGALG00000001534	0.164244	0.0702992	0.231791	0.0986915	0.139851	0.0334456
ENSGALG00000001536	8.3606	6.86643	8.23787	8.28296	7.46318	7.20158
ENSGALG00000001538	13.0731	14.5658	21.4678	19.9867	14.0135	15.0787
ENSGALG00000001540	20.7128	23.0014	20.8099	17.8023	24.6058	20.3124
ENSGALG00000001542	47.9138	46.0557	43.0844	37.23	53.9098	48.9544
ENSGALG00000001545	0.692443	1.07867	0.995791	1.56661	0.779748	0.912705
ENSGALG00000001546	3.40407	3.68841	3.52875	2.64641	2.2413	2.9362
ENSGALG00000001547	57.362	63.1379	69.8054	48.5567	65.0151	69.4141
ENSGALG00000001550	44.3803	41.4244	46.3474	48.9448	46.9808	43.8251
ENSGALG00000001551	36.5232	21.4355	37.3079	39.2868	42.0333	41.2458
ENSGALG00000001555	21.4353	18.8705	17.0536	19.0436	21.2655	19.7623
ENSGALG00000001557	8.21701	10.0092	8.55076	11.3196	7.14965	9.21443
ENSGALG00000001558	23.8587	36.2642	17.3818	25.0502	25.6704	22.2486
ENSGALG00000001559	1856.48	4186.95	1477.64	2297.78	1769.99	2342.86
ENSGALG00000001561	53.7336	18.8814	23.4127	29.0922	35.15	35.3753
ENSGALG00000001563	21.5979	24.3622	30.1263	20.5346	22.9909	20.7445
ENSGALG00000001564	2.28611	3.35416	3.1258	5.39443	2.39285	2.37681
ENSGALG00000001565	0.246734	0.26992	3.04645	0.262035	0.152734	0.237338
ENSGALG00000001568	28.8362	31.0693	29.6546	30.7939	30.2558	28.8521
ENSGALG00000001569	49.8905	79.8218	63.2825	76.819	49.092	48.94
ENSGALG00000001571	2.28163	2.57508	1.26045	4.44825	2.11973	1.70944
ENSGALG00000001572	32.7945	43.897	40.0634	46.8012	37.2151	39.6485
ENSGALG00000001573	0.421907	0.258648	0.975028	0.647005	0.127993	0.585782
ENSGALG00000001577	11.2914	12.5696	12.8141	10.8041	14.666	13.0193
ENSGALG00000001583	0.842705	0.98783	1.09935	1.30555	0.982715	0.920029
ENSGALG00000001586	7.86783	11.363	8.72393	9.18368	6.67362	8.25894
ENSGALG00000001593	21.6303	24.3992	25.8103	24.5753	25.6355	25.6081
ENSGALG00000001595	3.09693	2.63346	1.78151	1.9441	2.68173	1.8938
ENSGALG00000001596	10.2772	12.6706	12.1819	8.94336	10.7625	10.4644
ENSGALG00000001597	39.9043	54.6634	49.5578	39.5145	44.6175	46.5112
ENSGALG00000001600	8.16047	6.52581	7.58923	6.95444	8.27664	7.16104
ENSGALG00000001602	80.8844	92.1729	101.485	68.0846	99.9489	95.7785
ENSGALG00000001603	3.45744	4.59897	12.7494	10.628	3.52306	4.29402
ENSGALG00000001604	17.0654	28.5522	13.0986	8.71454	14.1009	21.4127
ENSGALG00000001605	2.56771	4.29663	6.14439	3.39653	2.35423	3.65142
ENSGALG00000001606	7.98715	8.48157	11.3144	8.50321	10.5361	10.1793
ENSGALG00000001607	10.4631	10.7739	13.6445	17.3667	10.0269	14.1496
ENSGALG00000001608	1.03884	0.640554	1.65829	0.609801	0.727668	0.707418
ENSGALG00000001610	10.3284	7.79646	8.24939	6.97007	11.6547	8.92648
ENSGALG00000001611	0.524642	0.517528	0.328625	0.122283	0.253681	0.503771
ENSGALG00000001613	28.4761	23.7961	27.0337	19.3407	29.0488	26.0957
ENSGALG00000001615	5.47263	6.17329	5.62207	6.96403	5.91964	5.98258
ENSGALG00000001616	16.033	14.5332	19.6323	11.7585	18.1361	14.4294
ENSGALG00000001617	0.651369	0.834132	1.62881	0.78514	0.964293	0.860228
ENSGALG00000001618	6.29238	5.89241	11.3783	4.76303	7.11408	5.22117
ENSGALG00000001619	6.50821	5.04578	8.81428	4.93309	6.23884	5.70662
ENSGALG00000001620	0.327851	0.604376	1.48855	0.949717	0.0608669	0.202606
ENSGALG00000001621	10.1817	10.3174	9.95871	15.3526	9.95238	7.2542
ENSGALG00000001624	4.73138	5.02314	5.92685	6.06431	5.6546	4.7682
ENSGALG00000001633	6.60347	6.09154	11.7529	6.73205	4.55145	6.91582
ENSGALG00000001634	1239.12	1336.29	1127.67	1539.5	1255.44	1347.45
ENSGALG00000001637	3.75035	4.1539	6.91435	3.14213	4.25207	4.11388
ENSGALG00000001639	6.67281	6.31599	7.64872	5.87569	6.81469	7.06159
ENSGALG00000001640	22.9518	25.1262	27.5887	31.0728	23.4184	22.3415
ENSGALG00000001642	43.7469	50.3575	42.0199	40.1327	44.9923	49.7737
ENSGALG00000001644	9.52911	8.87012	8.91321	9.63874	9.03532	9.51152
ENSGALG00000001645	1.06545	0.770478	0.974638	1.17972	1.0812	0.990283
ENSGALG00000001647	7.0813	6.71112	7.11321	5.07991	6.21053	6.89317
ENSGALG00000001651	3.05148	3.69736	3.89099	4.04393	2.48315	3.43933
ENSGALG00000001652	124.985	123.09	133.108	114.747	134.03	114.479
ENSGALG00000001653	1.01079	0.990003	0.874866	0.685263	1.24221	0.644704
ENSGALG00000001654	106.472	123.357	96.2057	88.107	143.15	109.396
ENSGALG00000001655	89.833	121.203	96.6914	102.259	102.445	98.2141
ENSGALG00000001658	589.397	796.413	661.86	642.997	633.522	698.358
ENSGALG00000001662	0.0134662	0	0.3702	0.0231751	0.0859525	0.144762
ENSGALG00000001663	15.2374	15.3434	15.1343	12.3447	16.7488	16.6152
ENSGALG00000001664	21.8882	20.9689	15.9265	16.5943	22.0365	18.1031
ENSGALG00000001666	6.891	12.7876	14.6497	13.2799	7.04629	8.1657
ENSGALG00000001668	15.3893	17.0193	16.3741	14.5098	16.7989	16.2735
ENSGALG00000001678	4.00751	6.04165	9.78061	6.71823	4.87781	6.08385
ENSGALG00000001682	9.03451	8.82094	9.7901	10.5469	8.94207	9.93676
ENSGALG00000001684	30.8763	36.2202	34.9652	32.5059	30.6805	29.7023
ENSGALG00000001688	24.9168	18.7033	32.0015	17.2105	23.0869	23.4012
ENSGALG00000001689	62.044	63.9723	57.8668	60.3138	55.4625	57.505
ENSGALG00000001690	0.28701	0.218609	1.90436	1.61468	0.405346	1.51207
ENSGALG00000001691	20.0204	19.1767	19.0585	12.2456	20.6742	19.0215
ENSGALG00000001692	10.9999	11.78	12.1441	11.3483	7.95866	9.1006
ENSGALG00000001693	0.0996073	0.255846	0.0402255	0.080968	0.213386	0.0817826
ENSGALG00000001696	0.356406	0.32865	0.687222	0.286588	1.70604	0.718137
ENSGALG00000001698	1.27425	0.376735	2.44605	2.60839	0.583132	2.36539
ENSGALG00000001701	4.46551	1.75854	2.59052	5.05851	4.55573	4.53901
ENSGALG00000001702	7.68309	3.48845	4.13432	3.48617	3.72978	4.24606
ENSGALG00000001708	13.4183	12.3058	10.7965	10.9254	13.3311	12.1769
ENSGALG00000001709	1.44494	2.57678	3.62315	1.6803	1.37775	2.63691
ENSGALG00000001711	3.2175	3.26405	3.91729	4.08753	3.892	3.24629
ENSGALG00000001714	6.07417	4.52498	4.6941	5.5935	5.51621	5.18819
ENSGALG00000001716	0.983214	0.346685	0.602971	0.753965	0.53972	0.616646
ENSGALG00000001717	82.1065	110.804	78.9161	72.5057	85.562	86.9201
ENSGALG00000001718	39.808	42.0539	53.6258	37.0167	29.5067	35.6727
ENSGALG00000001720	10.0689	8.77966	8.23512	7.62532	10.2052	9.85743
ENSGALG00000001721	1.06571	2.23583	30.844	1.02555	1.51099	2.45728
ENSGALG00000001722	9.56401	9.54941	10.3697	8.80753	9.02677	9.03262
ENSGALG00000001725	7.13424	5.99072	6.94073	7.09482	6.98709	6.71533
ENSGALG00000001726	25.1048	26.3782	22.4095	20.9943	27.8852	24.0879
ENSGALG00000001727	5.58253	5.09869	8.25622	4.98088	5.26687	4.68258
ENSGALG00000001728	8.09566	9.46313	7.42202	7.79281	7.3834	7.37391
ENSGALG00000001729	19.2246	23.5188	18.4396	20.7111	16.5824	16.8347
ENSGALG00000001730	7.43591	6.38805	8.75658	6.36078	6.20315	6.07108
ENSGALG00000001731	9.99216	9.85968	8.50385	8.08055	9.52876	8.48218
ENSGALG00000001733	12.3434	13.7747	15.311	12.0227	10.9921	12.302
ENSGALG00000001737	11.739	10.8216	12.0827	9.97764	11.8123	12.5749
ENSGALG00000001740	1.43614	3.22438	4.22244	3.69572	2.25873	5.37352
ENSGALG00000001741	63.832	78.2597	58.3973	66.0806	65.8415	60.4328
ENSGALG00000001749	8.95329	8.51203	14.4336	11.0007	9.30651	13.0816
ENSGALG00000001750	51.8331	67.7021	45.6589	50.6335	49.7189	47.9386
ENSGALG00000001753	1.2588	1.54038	1.60387	1.00847	1.40947	1.32102
ENSGALG00000001758	8.6043	8.71364	13.1953	8.00587	8.65489	10.9893
ENSGALG00000001764	5.36471	1.42284	1.73798	1.11259	4.55185	2.88321
ENSGALG00000001765	3.85266	3.84725	4.6207	3.34596	4.9085	4.23236
ENSGALG00000001768	0.686321	0.939103	2.08533	1.61803	0.71977	0.744564
ENSGALG00000001773	5.60274	8.41636	7.60138	10.7384	6.06266	6.39972
ENSGALG00000001774	7.31355	4.49429	5.3668	3.72633	7.66245	7.67721
ENSGALG00000001777	16.0947	18.8031	27.8238	20.3489	14.8143	17.8368
ENSGALG00000001779	1.8774	2.53215	2.60255	3.64342	3.08734	2.43932
ENSGALG00000001780	0.304938	0.17543	0.137205	0.350357	0.194889	0.216984
ENSGALG00000001782	9.96849	11.1079	13.7761	8.95755	11.0702	12.3811
ENSGALG00000001788	32.5927	28.2842	27.8889	22.7883	35.2538	33.0012
ENSGALG00000001790	4.83844	7.10561	6.17958	3.65075	5.17617	4.6286
ENSGALG00000001791	2.64025	4.49871	4.9512	6.58369	4.18816	4.90011
ENSGALG00000001792	35.7713	46.8949	40.1733	42.9385	41.3046	42.8215
ENSGALG00000001797	7.70657	13.2205	18.0088	14.2232	7.73653	12.011
ENSGALG00000001798	3.31091	3.94868	5.8418	5.36267	3.19374	5.29224
ENSGALG00000001800	5.71433	3.44871	3.65641	4.28672	5.38757	4.81473
ENSGALG00000001801	4.9935	3.97198	5.58359	3.70257	2.49615	4.79536
ENSGALG00000001802	14.2104	19.5722	17.6429	9.53991	17.3635	15.0173
ENSGALG00000001803	13.2623	14.5763	14.9912	14.1195	14.5123	13.5821
ENSGALG00000001805	31.5353	37.3397	42.1042	30.63	29.4334	42.4353
ENSGALG00000001806	0.0562178	0.186167	0.211143	0.07019	0.108732	0
ENSGALG00000001812	2.30547	1.16296	2.78109	1.23709	2.09725	1.086
ENSGALG00000001816	3.45052	2.73228	5.13576	3.3234	3.92081	3.87583
ENSGALG00000001817	19.6682	19.8651	16.9727	15.5212	19.2492	17.7754
ENSGALG00000001823	30.825	39.9698	47.2065	37.7279	33.5256	36.5107
ENSGALG00000001824	0.989448	0.464656	0.977322	1.28803	0.971121	0.901352
ENSGALG00000001826	5.27237	5.87567	10.4152	6.68687	4.67299	5.71762
ENSGALG00000001828	0.524615	0.313456	0.657034	0.765603	0.758511	0.503435
ENSGALG00000001833	28.1566	34.1864	41.4512	30.0798	34.7383	32.2753
ENSGALG00000001837	14.2726	10.8926	13.3941	9.68953	13.1779	11.253
ENSGALG00000001838	18.235	19.4441	18.2954	15.3811	19.2718	17.2983
ENSGALG00000001840	4.98456	5.01034	5.27844	5.60541	5.84927	6.09507
ENSGALG00000001841	8.37413	10.1325	15.7118	9.10385	8.98289	9.33084
ENSGALG00000001844	2.29486	2.60479	2.22098	2.74635	2.56083	2.39309
ENSGALG00000001845	6.57304	4.42766	4.34709	6.24839	6.22783	6.93777
ENSGALG00000001848	28.5867	32.7786	41.0849	27.921	27.8009	28.4815
ENSGALG00000001849	0.399225	0.262828	0.306005	0.254112	0.300526	0.305877
ENSGALG00000001850	24.1605	24.502	23.1208	20.4856	25.7889	27.4896
ENSGALG00000001852	14.5559	15.8001	15.6017	13.3901	15.8925	14.3083
ENSGALG00000001856	9.96894	9.77659	5.73538	9.65992	7.69489	9.22273
ENSGALG00000001857	1.64101	1.05385	5.65903	2.25886	1.67493	2.02886
ENSGALG00000001859	5.70287	3.34674	5.47581	2.63529	3.28974	3.90385
ENSGALG00000001860	5.37366	5.07766	5.42103	4.81467	5.43781	4.69346
ENSGALG00000001862	0.700875	0.360574	1.34213	0.807043	0.803895	0.561645
ENSGALG00000001863	0.123991	0.135059	0.324424	0.163289	0.172567	0.321293
ENSGALG00000001864	1.16008	0.97514	1.72259	1.72729	1.66558	1.31346
ENSGALG00000001872	53.6005	60.4301	48.2262	47.6678	57.4207	51.8558
ENSGALG00000001876	5.84465	6.69493	6.51853	6.70098	6.97022	4.61445
ENSGALG00000001882	0.253259	0.250144	0.131722	0.185908	0.380513	0.189451
ENSGALG00000001883	1.01673	1.54313	6.83579	1.1633	1.16513	1.00084
ENSGALG00000001889	1.75884	2.00685	1.502	3.07733	2.13856	1.78442
ENSGALG00000001892	23.4738	7.04027	15.4859	4.93268	15.7543	12.4281
ENSGALG00000001894	0.0593318	0.113607	0.122344	0.212228	0.243842	0.120959
ENSGALG00000001895	31.2929	37.6074	35.7553	23.0647	25.7034	38.7506
ENSGALG00000001901	22.2292	21.495	23.2883	17.1591	23.5254	21.3403
ENSGALG00000001905	6.74652	8.86142	23.3853	6.27943	6.79572	6.96374
ENSGALG00000001907	16.1274	17.7663	15.0467	15.1658	15.3396	15.0292
ENSGALG00000001912	0	0.0156092	0.862177	0	0.030431	0.0129699
ENSGALG00000001916	9.23376	13.2222	13.5253	9.79686	7.73758	10.5951
ENSGALG00000001918	6.06231	9.80349	6.01964	7.0457	5.70937	7.02343
ENSGALG00000001921	1.2382	1.32236	2.26318	1.9378	1.20244	1.31974
ENSGALG00000001925	3.50723	3.80205	4.68588	3.55952	3.5525	3.6689
ENSGALG00000001926	291.371	255.745	274.94	231.606	267.05	270.926
ENSGALG00000001933	7.64032	11.9924	4.80781	5.83461	8.66036	11.1985
ENSGALG00000001938	24.6563	31.8277	37.7511	25.712	24.6788	25.4089
ENSGALG00000001939	17.7425	16.7532	13.0719	13.0214	16.9082	14.8196
ENSGALG00000001942	8.36768	9.34575	13.6585	11.4111	9.99194	9.29775
ENSGALG00000001943	3.12592	3.00528	4.65017	3.49022	2.80656	3.0308
ENSGALG00000001944	2.50093	3.95155	3.35463	4.33604	2.67812	2.54961
ENSGALG00000001945	8.71715	7.95151	7.94749	9.40084	10.3542	9.18262
ENSGALG00000001946	1.07823	1.27479	1.60481	4.46906	0.91082	2.14928
ENSGALG00000001947	10.6713	12.2366	10.1412	9.18914	12.2051	12.0061
ENSGALG00000001948	12.9649	11.0946	11.5046	13.7771	14.6378	12.8143
ENSGALG00000001949	79.6044	100.504	75.309	60.906	88.1688	82.5392
ENSGALG00000001950	20.9139	28.0414	24.1329	20.6803	23.6824	24.5973
ENSGALG00000001951	5.6297	7.36762	8.42303	8.74708	6.59914	5.23515
ENSGALG00000001954	3.34727	4.73924	5.04823	4.32953	4.71576	4.68221
ENSGALG00000001956	23.182	14.7459	18.0645	7.86293	19.891	20.8291
ENSGALG00000001959	0.487865	0.483735	5.43106	0.687598	0.58566	0.59501
ENSGALG00000001962	73.0788	72.2823	69.8175	54.3135	85.3374	77.0803
ENSGALG00000001963	1.13336	1.50596	1.84966	1.67683	1.1558	1.42347
ENSGALG00000001964	5.79023	5.40464	7.05304	4.90015	5.6093	5.45894
ENSGALG00000001965	31.7369	35.9121	29.4487	23.8155	31.9805	28.701
ENSGALG00000001968	0.725133	0.43521	0.777598	0.6664	0.983155	0.726811
ENSGALG00000001971	8.15973	9.02869	18.2148	6.88303	8.49596	8.5292
ENSGALG00000001972	17.3407	22.1647	17.0541	19.0837	20.4726	17.8448
ENSGALG00000001973	8.66932	7.96657	11.5771	8.79873	9.51126	9.76531
ENSGALG00000001975	18.5727	19.2986	16.2773	21.1252	17.399	18.1972
ENSGALG00000001976	5.25968	4.71904	9.92927	5.04375	5.13257	5.0873
ENSGALG00000001977	0.145248	0.0750092	0.284381	0.160559	0.0696081	0.0700692
ENSGALG00000001978	10.0515	8.80357	12.9485	10.5397	10.6862	10.7704
ENSGALG00000001981	4.42101	3.83063	4.5111	5.09087	5.29804	5.01818
ENSGALG00000001983	0.521873	0.544094	0.822955	0.19649	0.384426	0.370257
ENSGALG00000001985	3.65258	3.85255	5.24359	4.89952	3.90324	4.72101
ENSGALG00000001986	80.4331	99.7377	84.9646	79.33	85.4746	78.4352
ENSGALG00000001988	5.57915	5.82219	6.26354	4.90745	5.18112	5.4044
ENSGALG00000001992	329.776	423.79	508.282	253.616	376.106	359.341
ENSGALG00000001995	36.9369	31.2733	35.5216	27.8585	39.9004	39.7131
ENSGALG00000001996	0.640556	1.01674	0.994734	1.34061	0.695248	1.32202
ENSGALG00000001998	9.94455	13.3579	15.7092	12.3074	9.23018	9.35969
ENSGALG00000002000	6.13608	8.16768	28.6789	10.0307	6.37568	7.49054
ENSGALG00000002001	8.40044	9.86323	23.342	8.00134	9.64992	10.0561
ENSGALG00000002002	28.8453	32.0159	33.5806	35.396	28.7608	27.9154
ENSGALG00000002003	9.12127	8.3416	9.75419	7.51041	8.67944	9.21359
ENSGALG00000002008	2.2211	2.92822	3.57419	2.16002	1.9798	2.4126
ENSGALG00000002009	2.46594	2.24454	3.56254	2.22925	2.41611	2.42771
ENSGALG00000002010	12.419	11.7689	12.6688	12.4368	13.332	10.9618
ENSGALG00000002012	12.8646	12.9961	10.9317	10.7817	9.68343	13.8717
ENSGALG00000002013	35.4532	37.0686	50.3331	51.9827	38.8153	42.9648
ENSGALG00000002014	25.4035	26.574	25.8099	22.2647	30.425	30.5411
ENSGALG00000002015	0.871592	0.384833	0.231895	0.23267	0.478831	0.49461
ENSGALG00000002016	6.34619	7.20813	7.10002	7.34281	5.86637	6.3207
ENSGALG00000002018	10.2242	10.3777	8.77299	10.646	9.32906	9.11544
ENSGALG00000002021	5.77144	5.25755	8.54233	6.69889	6.17482	5.5008
ENSGALG00000002022	36.2962	40.5654	33.592	25.2467	35.1521	32.1885
ENSGALG00000002023	3.41001	3.20309	4.42585	2.1279	3.37122	3.53689
ENSGALG00000002024	7.39503	8.86119	8.90673	15.4723	6.93249	8.61032
ENSGALG00000002028	3.46727	2.48077	4.03124	1.88681	3.14149	2.84217
ENSGALG00000002029	19.1497	18.7213	22.5884	16.1122	19.5174	17.0349
ENSGALG00000002033	165.039	194.369	161.787	156.532	152.472	167.413
ENSGALG00000002038	3.84384	3.16302	2.89313	3.31984	4.16431	3.89978
ENSGALG00000002042	7.58952	7.08015	8.99128	7.24853	8.42455	8.829
ENSGALG00000002043	6.02611	5.68974	5.36789	5.02931	5.84505	5.38008
ENSGALG00000002044	3.76234	3.01349	4.16562	5.05723	5.26715	4.01849
ENSGALG00000002046	4.13659	3.33656	3.37123	3.29289	2.90486	4.52158
ENSGALG00000002048	1.33353	0.981271	1.51607	1.18064	1.49866	1.47377
ENSGALG00000002050	19.8822	20.5147	24.4146	15.1474	22.2124	21.055
ENSGALG00000002053	126.698	114.289	92.6828	103.098	113.492	118.735
ENSGALG00000002055	4.2892	5.95382	19.694	5.48384	5.14927	4.35653
ENSGALG00000002056	14.0869	16.8945	23.3216	19.4658	14.0523	19.4466
ENSGALG00000002057	25.1994	32.5388	34.1318	29.6709	31.3942	34.4229
ENSGALG00000002060	40.7387	36.5388	34.2335	30.3963	47.7508	41.2275
ENSGALG00000002062	23.5683	23.6738	22.3941	20.8398	26.4542	24.2576
ENSGALG00000002064	23.6532	30.4725	27.058	21.9315	24.3428	25.8045
ENSGALG00000002066	59.3311	60.6377	66.0868	53.8982	58.5903	61.7997
ENSGALG00000002067	7.36136	6.05565	8.01319	7.72998	7.69736	7.63441
ENSGALG00000002069	5.6202	5.35719	5.3073	12.2378	4.49479	5.95087
ENSGALG00000002070	10.4966	10.0372	9.84684	9.23231	10.633	9.53723
ENSGALG00000002080	0.823596	0.63167	1.51679	1.62539	0.527533	0.667122
ENSGALG00000002081	2.79304	2.55032	2.20843	2.71261	4.56657	3.18149
ENSGALG00000002082	0.0605929	0.0405717	0.153	0.114047	0.0583098	0.0951826
ENSGALG00000002083	0.425994	0.965203	23.6932	0.416413	0.54492	1.47568
ENSGALG00000002085	15.1351	15.2612	19.248	12.1664	13.3436	15.4208
ENSGALG00000002086	0.556317	0.964542	1.45992	1.11307	1.94194	2.35357
ENSGALG00000002087	7.80941	7.65988	9.72269	5.46663	9.63854	8.87651
ENSGALG00000002088	0.744655	1.70548	1.29692	0.860317	0.835935	0.794693
ENSGALG00000002089	34.9677	40.5335	34.5184	28.8525	38.5597	35.5168
ENSGALG00000002090	8.94998	8.24326	7.50249	6.65656	11.8721	9.24006
ENSGALG00000002091	2.26067	2.19377	0.395785	0.379074	0.391397	3.08635
ENSGALG00000002094	9.80971	10.5326	10.2134	11.3386	11.1986	10.4977
ENSGALG00000002095	52.8901	58.3332	52.0332	53.2144	55.7589	49.5621
ENSGALG00000002099	9.30826	9.62243	12.4075	9.12083	10.7236	10.9335
ENSGALG00000002102	0.713876	3.71203	2.70057	8.86269	4.14473	0.663436
ENSGALG00000002103	13.78	31.2239	11.0775	25.6093	11.8319	21.891
ENSGALG00000002105	0.117232	0.119543	0.490646	0.291255	0.130385	0.130532
ENSGALG00000002106	15.4885	16.7934	12.4668	12.8413	14.692	15.8178
ENSGALG00000002107	65.5015	64.9808	56.5409	38.6852	71.4505	66.6457
ENSGALG00000002108	0.160396	0.112628	0.0530192	0.0359096	0.0590325	0.152641
ENSGALG00000002110	1.89488	3.00044	2.76225	2.0787	2.37939	2.65026
ENSGALG00000002111	0.0759423	0.203837	0.75055	0.268587	0.24755	0.26458
ENSGALG00000002112	2.84818	6.8884	1.69005	7.86189	3.23179	3.05014
ENSGALG00000002113	1.08865	1.21155	0.77761	3.38134	0.978858	0.984276
ENSGALG00000002116	1.37002	0.879045	1.34353	1.1907	1.05454	1.25217
ENSGALG00000002117	17.6063	17.9882	17.3085	15.0082	17.0991	17.5198
ENSGALG00000002118	22.179	12.4394	23.8547	18.5162	23.824	40.3614
ENSGALG00000002119	16.1084	18.1717	23.97	15.8139	18.404	18.1324
ENSGALG00000002121	0.0412728	0.0537157	0.0757296	0.0767302	0.106793	0.126704
ENSGALG00000002123	1.99713	1.64118	1.7463	2.19853	1.57126	1.9105
ENSGALG00000002124	4.70344	4.29405	3.70924	4.83769	4.0255	5.09383
ENSGALG00000002125	0.748576	0.646511	0.64481	0.936843	0.779024	0.944319
ENSGALG00000002127	4.82777	5.03831	5.64634	6.20606	3.7035	6.38222
ENSGALG00000002129	8.25601	6.89655	15.0743	7.28132	8.20737	7.9527
ENSGALG00000002131	9.49462	11.1682	9.79962	9.68692	8.92849	10.9524
ENSGALG00000002132	1.96997	2.30947	4.58499	3.02013	1.80404	1.99849
ENSGALG00000002137	27.2489	28.2769	28.1621	23.771	27.8411	27.294
ENSGALG00000002138	12.1959	13.8533	12.3054	9.19082	11.972	12.305
ENSGALG00000002139	115.429	121.674	129.521	101.461	127.011	123.118
ENSGALG00000002141	20.2379	28.444	19.642	12.9232	18.3484	19.9459
ENSGALG00000002142	2.82241	4.01183	16.1323	1.79016	1.26463	3.66768
ENSGALG00000002143	8.91275	8.09406	9.36971	6.37696	9.43394	8.94335
ENSGALG00000002144	46.6174	41.7751	36.9277	42.7813	51.4608	44.9368
ENSGALG00000002145	9.41303	9.81131	9.77198	8.89656	7.90414	9.8285
ENSGALG00000002147	30.6813	36.0159	62.8594	30.2439	38.834	36.0299
ENSGALG00000002150	1.30106	1.97221	14.8806	1.94924	2.13675	2.82361
ENSGALG00000002151	5.21634	6.25774	7.968	5.87591	7.2938	4.905
ENSGALG00000002152	0.15812	0.0598967	0.200464	0.400302	0.273125	0.242147
ENSGALG00000002155	29.1442	23.7635	28.8733	19.0514	31.8952	27.8334
ENSGALG00000002157	497.393	695.809	573.684	725.227	488.561	576.149
ENSGALG00000002158	11.8544	11.2853	15.7147	9.5766	10.7884	11.6716
ENSGALG00000002159	40.6577	47.1936	37.829	36.2705	41.7239	39.7606
ENSGALG00000002160	293.64	502.94	394.109	571.044	345.727	334.798
ENSGALG00000002162	28.8237	30.199	25.4116	23.2041	30.9946	30.946
ENSGALG00000002164	5.39434	5.62447	9.68004	7.30016	6.5578	6.89969
ENSGALG00000002165	4.21462	3.75941	3.52634	2.02074	4.53673	3.52272
ENSGALG00000002167	2.05244	2.17649	5.22532	2.46648	2.33078	2.84309
ENSGALG00000002169	51.2386	53.1025	33.8887	60.5802	54.4497	52.1312
ENSGALG00000002170	0.497978	0.385976	0.328899	0.460507	0.308698	0.517715
ENSGALG00000002172	27.0216	25.3467	24.8145	21.7127	27.3256	26.5324
ENSGALG00000002175	2.84638	5.10557	4.24517	3.30437	3.83281	3.01206
ENSGALG00000002179	5.44177	7.10298	8.2371	7.84046	6.80156	4.86326
ENSGALG00000002180	10.1691	9.30249	12.2072	8.99991	10.4992	11.2077
ENSGALG00000002182	48.3271	68.7395	51.9084	49.7433	35.3174	43.8456
ENSGALG00000002183	3.17164	6.21812	6.72154	7.29329	5.88654	2.87908
ENSGALG00000002187	22.7639	26.8089	25.8879	25.3033	22.4051	21.8303
ENSGALG00000002189	67.0859	77.9547	153.696	56.2861	75.5869	84.4624
ENSGALG00000002192	2.44459	3.07989	1.628	6.32771	2.30006	1.9049
ENSGALG00000002193	5.81186	4.63707	5.69124	4.40546	6.00928	5.98615
ENSGALG00000002194	14.9526	18.4946	17.5836	16.7111	13.8929	13.6212
ENSGALG00000002197	284.186	341.005	295.726	267.614	315.064	308.249
ENSGALG00000002198	8.88839	9.539	6.45955	10.5224	8.69751	8.66421
ENSGALG00000002199	1.2017	0.561512	0.502747	0.81236	0.638068	0.839382
ENSGALG00000002201	11.9666	29.7362	21.812	29.1183	13.503	21.0805
ENSGALG00000002203	0.644567	0.732056	1.3558	1.82251	0.705647	1.34897
ENSGALG00000002204	1.03599	0.839438	4.0792	0.914213	0.915476	1.36168
ENSGALG00000002205	6.87333	7.51697	6.84054	8.17026	6.97075	7.56988
ENSGALG00000002207	0.167687	0.0581908	0.24547	0.0786425	0	0.346524
ENSGALG00000002210	717.521	830.721	651.803	685.854	748.645	733.041
ENSGALG00000002216	11.5962	9.92237	14.3624	12.2531	11.6057	12.3392
ENSGALG00000002219	27.5559	42.2995	53.561	34.9488	32.3547	33.7138
ENSGALG00000002222	15.3499	15.226	13.9281	11.8844	17.4828	13.7379
ENSGALG00000002223	3.23887	1.42096	2.60756	0.872347	1.62565	1.44673
ENSGALG00000002225	6.89595	7.20239	11.7618	7.3596	6.5348	6.45692
ENSGALG00000002227	1.12999	1.75216	1.49261	1.54993	0.777546	1.27419
ENSGALG00000002229	26.93	31.7929	35.1592	24.6938	27.3365	26.1174
ENSGALG00000002232	13.2286	14.4507	12.5982	13.5196	13.3326	11.3099
ENSGALG00000002234	0.695012	0.350477	0.554795	1.13667	0.396576	0.728413
ENSGALG00000002237	31.9793	42.1088	41.9955	34.1668	31.8917	33.0659
ENSGALG00000002239	4.2806	3.57624	4.12172	4.09295	5.35266	4.9613
ENSGALG00000002240	1.58477	0.80559	1.49278	1.94542	1.37645	0.985326
ENSGALG00000002242	0.663553	0.410507	0.50433	0.464295	0.738738	0.789302
ENSGALG00000002244	0.0502985	0.190047	0.0874003	0.424741	0.0659825	0.259932
ENSGALG00000002246	1.18335	1.44239	2.72322	1.84227	0.764348	1.88638
ENSGALG00000002247	6.75727	7.55797	7.73719	7.27678	6.63796	7.5582
ENSGALG00000002249	17.4097	14.2485	11.5621	12.0267	17.6338	15.0579
ENSGALG00000002250	0.721967	0.467856	0.76438	0.639337	0.611048	0.906205
ENSGALG00000002253	2.76687	2.91393	3.56725	2.87261	2.84591	2.61363
ENSGALG00000002260	45.1378	47.0836	37.4343	34.4346	36.5803	40.7543
ENSGALG00000002262	36.4032	41.8083	45.0649	27.3083	40.5681	38.9086
ENSGALG00000002263	1.23393	1.42559	1.2702	1.68672	1.4492	1.20617
ENSGALG00000002266	2.06533	3.14948	6.76382	1.48525	1.22039	1.88575
ENSGALG00000002267	7.38372	5.89024	7.24657	6.15154	6.24222	6.87889
ENSGALG00000002272	31.1546	35.1219	26.9451	23.9604	31.9582	36.5485
ENSGALG00000002273	8.05943	4.9103	7.62676	8.58474	8.07975	7.72097
ENSGALG00000002276	1.50396	2.4187	2.68756	1.82195	1.82683	2.03727
ENSGALG00000002277	7.29186	8.59243	10.5849	8.5587	6.70709	7.46418
ENSGALG00000002278	3.72032	2.94928	3.44067	3.97348	3.51944	2.95544
ENSGALG00000002282	39.9987	17.2827	29.7451	18.6273	39.5147	37.6543
ENSGALG00000002283	4.50295	4.75145	11.2911	12.2197	4.66349	5.97506
ENSGALG00000002284	26.6173	31.9285	31.7115	30.5996	33.1873	30.011
ENSGALG00000002285	16.3097	21.8313	31.192	18.3783	14.9911	15.7117
ENSGALG00000002286	267.025	304.965	279.581	277.3	304.771	299.783
ENSGALG00000002288	10.5199	9.77375	8.71473	9.46854	12.1036	10.8749
ENSGALG00000002294	8.78256	14.3354	7.28182	14.554	8.24092	8.64013
ENSGALG00000002298	11.7996	7.64418	6.44041	9.76457	8.27862	5.82069
ENSGALG00000002301	21.084	22.1847	23.2731	17.7553	21.3686	20.2657
ENSGALG00000002304	14.5186	16.7755	19.2911	15.2627	15.3254	14.3343
ENSGALG00000002305	2.73337	3.32799	3.7702	2.56204	2.74507	2.91415
ENSGALG00000002307	0	0.166316	0.76269	0.0634462	0.0662952	0.0319058
ENSGALG00000002308	11.5815	13.551	15.1321	11.825	20.476	10.6202
ENSGALG00000002311	6.66099	8.10273	7.5529	8.06114	7.54553	6.66619
ENSGALG00000002312	0.588972	0.148337	0.637933	0.463864	0.770325	0.7902
ENSGALG00000002313	11.7368	10.6016	7.18233	9.2805	11.2074	10.7602
ENSGALG00000002314	0	0.0493309	0.502294	0.104225	0.0703193	0.138703
ENSGALG00000002315	27.7492	31.2231	28.4621	29.5959	27.0205	27.9809
ENSGALG00000002316	9.10708	11.0305	12.5907	9.1004	9.38081	10.2528
ENSGALG00000002318	0.201578	0.105611	0.0449847	0.0326697	0.101369	0.0111354
ENSGALG00000002319	5.34992	3.52867	1.89659	2.07394	4.15002	5.77993
ENSGALG00000002321	106.408	142.24	109.976	72.7493	96.3112	99.6404
ENSGALG00000002325	0.22942	0.208407	0.255758	0.410667	0.241496	0.0864564
ENSGALG00000002326	10.929	10.708	9.17848	8.01973	11.3063	11.9204
ENSGALG00000002329	0.503019	0.332205	0.0758126	0.226	0.389142	0.0756181
ENSGALG00000002335	0.208867	0.0951943	0.379002	0.340547	0.135603	0.348057
ENSGALG00000002336	5.02284	5.44714	6.91114	4.74741	5.01024	5.24329
ENSGALG00000002341	26.6671	27.2169	29.433	27.444	27.4323	28.2791
ENSGALG00000002345	12.9732	13.3909	16.806	13.224	11.2298	12.6945
ENSGALG00000002346	3.12033	3.51628	2.58641	1.61127	3.18172	2.61522
ENSGALG00000002347	29.1648	39.743	27.0107	39.8156	23.3537	25.4764
ENSGALG00000002350	0.086738	0.0823131	0.239908	0.211645	0.00555801	0.0383211
ENSGALG00000002354	11.8548	10.0102	11.3477	10.5588	11.5917	11.4159
ENSGALG00000002356	2.7381	1.87866	5.07635	3.10133	2.43764	3.2405
ENSGALG00000002358	4.84436	1.76585	3.87211	1.69894	6.53554	6.67282
ENSGALG00000002362	112.106	139.897	128.874	127.512	134.247	132.812
ENSGALG00000002363	91.5649	125.929	104.729	81.0578	95.7106	92.8875
ENSGALG00000002364	15.7243	15.7716	17.0573	13.5935	13.4816	16.1586
ENSGALG00000002370	0.049994	0.0912146	0.989753	0.0212185	0.128492	0.105073
ENSGALG00000002371	4.56476	2.7619	3.57126	2.25888	3.69225	3.47425
ENSGALG00000002374	2.0946	1.87136	2.56493	6.97761	1.74038	1.68213
ENSGALG00000002375	8.19176	5.93294	5.77066	6.5735	7.78461	7.15388
ENSGALG00000002377	537.485	790.867	917.895	442.379	663.805	689.037
ENSGALG00000002379	52.1527	63.7213	65.8594	70.2521	59.3049	61.0895
ENSGALG00000002383	0.148964	0.190079	0	0.791508	0	0.0725443
ENSGALG00000002386	0.360358	0.409869	0.501575	0.783192	0.543638	0.60234
ENSGALG00000002388	20.9984	24.6671	24.7687	23.9248	23.0912	23.9659
ENSGALG00000002389	4.6264	2.95967	3.80175	4.5757	2.56246	5.47512
ENSGALG00000002390	0.140774	0.965721	0.529671	0.452258	0.532431	0.161152
ENSGALG00000002394	5.54842	5.32521	5.7038	4.78307	5.08606	5.94196
ENSGALG00000002397	2.08782	2.48628	3.09987	1.70808	2.72669	2.41182
ENSGALG00000002399	8.21301	6.74156	5.71635	9.44861	10.2213	8.72481
ENSGALG00000002403	4.73883	4.14142	5.22027	2.99777	3.39173	2.89417
ENSGALG00000002408	3.78542	4.94167	5.0771	3.67391	4.8941	4.44251
ENSGALG00000002412	10.9726	13.0256	14.7106	10.1088	10.2273	11.4654
ENSGALG00000002414	12.4093	12.2555	10.7368	10.3835	10.7318	10.5764
ENSGALG00000002415	11.8073	16.1835	22.0725	14.2664	14.3838	14.122
ENSGALG00000002417	17.8721	13.6158	14.2642	12.9356	16.1643	16.5648
ENSGALG00000002419	1.23576	0.974298	0.837054	1.05891	1.00405	1.10679
ENSGALG00000002421	114.836	188.038	124.336	193.972	77.6299	112.967
ENSGALG00000002424	2.74801	2.4908	4.33458	2.85015	2.69022	3.50206
ENSGALG00000002426	8.64609	10.2467	9.64656	10.3589	9.438	10.7557
ENSGALG00000002427	1.53744	1.8804	8.38374	2.46197	1.27098	1.64086
ENSGALG00000002428	7.77682	14.2963	49.5759	5.26401	10.4212	13.2151
ENSGALG00000002430	38.6841	43.7707	39.737	32.4761	39.6073	41.9788
ENSGALG00000002431	17.7512	12.5192	17.1017	18.5247	17.1481	14.8558
ENSGALG00000002437	2.45291	2.10268	3.54688	3.5498	2.37435	2.88235
ENSGALG00000002439	12.0002	22.4952	10.4657	12.7237	8.57056	12.1767
ENSGALG00000002442	0.0500384	0.0329611	0.249205	0.315033	0.129881	0.0311088
ENSGALG00000002445	15.9198	17.2857	15.2172	13.1092	14.0697	13.839
ENSGALG00000002447	64.2468	66.1935	69.9554	49.7917	68.021	65.5485
ENSGALG00000002448	99.6829	128.015	123.317	84.4739	118.956	116.643
ENSGALG00000002450	11.9913	10.7227	9.65348	9.64457	10.9088	9.97208
ENSGALG00000002452	2.78213	5.41612	9.06458	2.84054	2.89847	4.29088
ENSGALG00000002457	11.6866	12.7459	16.6449	13.4997	8.41067	12.4898
ENSGALG00000002458	9.9887	11.7652	12.6516	13.8735	8.97655	10.8266
ENSGALG00000002461	2.12964	1.7214	7.66197	3.67244	3.48944	2.85849
ENSGALG00000002463	8.38952	10.0252	8.48552	9.90803	7.0358	8.5286
ENSGALG00000002466	0.846137	0.930657	1.38246	2.04489	0.622828	0.878067
ENSGALG00000002467	28.0922	13.9247	17.1458	14.6414	22.5742	21.4864
ENSGALG00000002469	12.744	14.3304	14.2564	14.5957	13.3203	13.239
ENSGALG00000002470	7.36311	10.4289	13.6829	8.9966	4.98963	9.20786
ENSGALG00000002473	1.75856	1.62964	2.28316	2.5318	1.8675	1.69025
ENSGALG00000002478	50.7369	51.0493	48.0182	50.8736	53.8101	55.5342
ENSGALG00000002479	4.96676	5.85107	4.80076	3.96033	6.26753	6.05984
ENSGALG00000002484	6.07145	6.72888	15.6048	5.85115	7.47452	5.1979
ENSGALG00000002485	13.5265	15.4103	14.7263	14.1081	13.5647	14.9962
ENSGALG00000002486	5.63205	4.86205	4.88169	4.77855	5.23973	4.92765
ENSGALG00000002487	10.367	7.71865	10.216	11.0476	10.2475	10.6964
ENSGALG00000002488	99.8193	115.301	116.564	106.262	102.967	107.329
ENSGALG00000002489	4.0426	4.52786	4.04626	3.33972	4.53909	4.29939
ENSGALG00000002490	76.5138	94.4559	83.339	69.9414	80.319	81.7545
ENSGALG00000002492	3.17023	3.68436	6.5051	3.99825	2.34933	4.09054
ENSGALG00000002495	108.994	167.092	130.703	119.966	109.92	117.244
ENSGALG00000002496	0.353668	0.106431	0.801139	0.0481247	0.149875	0.0493236
ENSGALG00000002497	9.22269	10.1606	9.98262	9.50586	10.1474	8.72116
ENSGALG00000002499	7.33113	6.236	6.59181	6.95786	6.611	7.9788
ENSGALG00000002500	32.8071	30.1972	24.5919	23.5646	28.8694	29.628
ENSGALG00000002501	11.2556	16.0239	16.7623	12.0102	13.5277	16.6516
ENSGALG00000002503	0.0911303	0.0494686	0.186156	0	0.0455924	0.0455206
ENSGALG00000002504	4.37261	5.05366	8.94321	4.46152	3.4401	5.6609
ENSGALG00000002506	24.9912	21.302	26.8628	21.1133	26.5693	19.65
ENSGALG00000002507	0.0616109	0.114856	0.216186	0.284682	0.0260525	0.104962
ENSGALG00000002510	15.8253	13.1227	16.7988	15.5983	14.8379	13.4076
ENSGALG00000002511	0.0680148	0.117519	1.36003	0.105289	0.138315	0.106189
ENSGALG00000002514	49.4859	56.1338	49.3243	44.8975	59.3013	50.536
ENSGALG00000002515	10.0898	9.16599	7.83205	5.14477	13.9285	9.53042
ENSGALG00000002517	10.7635	24.9895	18.0486	43.6995	9.60672	19.1759
ENSGALG00000002519	6.67462	8.36085	5.40833	6.48728	6.42926	7.59974
ENSGALG00000002523	33.4955	39.1272	26.3498	28.9837	32.8096	30.119
ENSGALG00000002524	26.5897	29.6893	35.5746	20.2042	30.2436	29.2896
ENSGALG00000002525	7.74356	8.61975	10.1896	6.89406	11.4033	8.5695
ENSGALG00000002527	15.3755	19.0421	15.9387	10.1092	11.9865	16.5653
ENSGALG00000002528	41.012	60.1807	76.3623	49.2521	43.4649	50.093
ENSGALG00000002529	4.66801	4.59251	7.80175	5.69373	5.58471	6.68282
ENSGALG00000002531	42.8107	42.8251	37.9261	32.7875	47.1744	38.9856
ENSGALG00000002532	3.47849	4.50214	16.2549	5.70381	3.06739	4.5335
ENSGALG00000002536	32.4052	37.0393	32.2932	28.6795	32.153	31.1894
ENSGALG00000002539	2.39334	1.58375	1.86557	1.4035	2.35739	2.42477
ENSGALG00000002542	10.2563	11.2687	11.5119	13.79	8.0684	8.81544
ENSGALG00000002543	12.379	14.335	14.1291	16.3326	13.2005	12.3495
ENSGALG00000002544	3.67806	2.68405	3.21752	2.83127	2.89774	3.25364
ENSGALG00000002546	196.493	98.4243	148.871	64.1508	202.54	162.492
ENSGALG00000002548	52.5468	47.2443	43.875	39.0263	49.2509	48.691
ENSGALG00000002549	0.708242	0.549763	0.434426	0.934709	0.35658	0.359933
ENSGALG00000002551	0.624975	0.430832	0.916533	1.15223	0.860146	0.693507
ENSGALG00000002553	3.29192	1.98073	2.67816	1.9444	3.96997	2.83486
ENSGALG00000002554	7.76543	7.15384	7.37414	4.87966	9.96344	8.17316
ENSGALG00000002555	0.125298	0	0.208859	0.294656	0.794093	0.201998
ENSGALG00000002556	1.37972	1.67787	1.84375	1.02669	1.24512	1.47959
ENSGALG00000002557	3.24472	6.79062	7.1984	4.98935	2.21955	5.0457
ENSGALG00000002558	0.0215452	0.13918	0.0669653	0.0909003	0.0845301	0.0663327
ENSGALG00000002561	4.47107	5.83984	6.83815	5.96577	6.03286	6.0589
ENSGALG00000002562	6.9335	4.65301	6.09145	4.89957	6.87097	6.96574
ENSGALG00000002563	136.597	104.6	90.1625	59.9636	146.765	131.361
ENSGALG00000002564	3.18641	2.78724	3.25123	1.22916	3.29842	4.10508
ENSGALG00000002569	269.253	296.834	285.261	181.174	312.876	285.964
ENSGALG00000002570	0.0988975	0.190591	0.210194	0.213174	0.353622	0.0918192
ENSGALG00000002576	1.90344	4.36772	2.85594	5.58171	2.5941	4.48158
ENSGALG00000002577	0.110174	0.279849	0.292652	0.164454	0.320197	0.108657
ENSGALG00000002578	18.0578	19.6716	16.2591	18.9779	15.9242	15.582
ENSGALG00000002579	0.0750005	0.198974	0.391332	0.522138	0.310749	0.370434
ENSGALG00000002581	9.24986	8.94365	13.4776	10.7265	11.0203	13.2824
ENSGALG00000002583	2.35078	2.2198	2.53337	3.1622	2.36108	2.35528
ENSGALG00000002587	12.5326	16.3639	19.3318	19.1341	10.7692	17.5343
ENSGALG00000002588	15.7367	19.2203	19.0072	12.7202	16.1636	17.5444
ENSGALG00000002591	77.9929	97.6657	79.7844	78.6987	81.3326	77.8866
ENSGALG00000002594	6.45169	9.68262	8.18211	7.53977	7.81648	10.7533
ENSGALG00000002595	169.042	238.986	208.492	251.675	145.412	172.073
ENSGALG00000002598	61.5334	73.3054	62.4963	66.5978	66.2553	61.4522
ENSGALG00000002599	5.69207	8.11033	10.0804	7.84091	7.76201	5.95465
ENSGALG00000002603	13.8225	12.2751	12.6991	12.8817	15.0495	13.1715
ENSGALG00000002605	37.0954	70.7374	59.5738	68.7159	45.6962	51.3152
ENSGALG00000002606	109.819	177.185	100.597	84.5611	98.3528	111.581
ENSGALG00000002610	1.05855	1.31302	0.894285	1.46689	1.98921	0.919183
ENSGALG00000002612	15.6932	12.9526	12.4649	14.5395	16.3867	15.3754
ENSGALG00000002615	1.75955	1.65561	3.18078	3.52661	2.05705	1.74726
ENSGALG00000002616	20.5555	19.7551	27.8316	19.4158	22.947	21.8644
ENSGALG00000002618	2.12171	2.24413	5.28967	1.66107	2.48509	2.48896
ENSGALG00000002621	10.2497	11.7646	29.2896	10.8614	11.1907	13.8493
ENSGALG00000002622	1.81704	1.70459	2.69092	1.91882	2.23747	2.13199
ENSGALG00000002623	5.65246	5.64412	4.29014	1.99236	7.37531	6.85592
ENSGALG00000002624	10.3846	9.5082	8.83728	7.60676	11.4453	10.8582
ENSGALG00000002630	2.58132	1.99184	2.33898	2.65983	2.64844	2.84107
ENSGALG00000002631	7.56091	3.62393	3.43896	2.99361	3.17994	4.4168
ENSGALG00000002632	5.68011	4.38279	5.81721	4.80721	6.07401	8.25102
ENSGALG00000002634	11.5007	13.811	19.5603	12.6385	16.1034	12.711
ENSGALG00000002637	162.503	368.536	130.313	109.003	117.519	262.194
ENSGALG00000002638	1.41369	0.871759	1.97473	1.15449	1.57395	2.29946
ENSGALG00000002639	11.6175	6.84169	8.34423	9.55411	11.4267	11.0205
ENSGALG00000002643	1.41724	1.96397	2.76653	1.15639	1.73956	2.37568
ENSGALG00000002644	251.212	339.81	327.313	295.503	276.024	311.862
ENSGALG00000002645	0.383049	0.897347	5.42052	0.513834	0.645296	0.674686
ENSGALG00000002646	3.44505	2.29653	6.10317	2.03908	3.00897	3.85199
ENSGALG00000002647	0.360435	0.657742	10.6228	0.235251	0.424642	0.845186
ENSGALG00000002648	5.89907	3.36526	3.51441	5.51585	5.85918	4.51883
ENSGALG00000002649	12.6888	11.5182	14.9093	13.1067	14.1295	12.1081
ENSGALG00000002651	30.9296	23.199	24.3465	22.3993	35.2755	25.7924
ENSGALG00000002653	5.36572	5.09529	4.09388	5.36614	5.70985	5.04929
ENSGALG00000002655	23.9107	24.3757	26.5242	16.9464	19.1057	27.3
ENSGALG00000002656	19.2482	22.6747	23.2345	17.9394	22.7921	22.4904
ENSGALG00000002659	31.1077	33.5768	34.7853	26.2903	35.9859	30.7458
ENSGALG00000002661	242.296	276.859	244.004	185.527	270.922	250.456
ENSGALG00000002663	2.97318	3.53477	2.89517	1.81923	2.44038	3.02293
ENSGALG00000002666	16.6234	16.1954	13.9992	14.0858	15.7563	14.6719
ENSGALG00000002667	23.3625	17.59	20.4199	15.1301	26.0227	20.4824
ENSGALG00000002671	0.378303	0.930697	2.01413	1.31909	0.830294	0.413179
ENSGALG00000002675	6.57973	11.3617	6.34901	6.58824	6.38391	6.61944
ENSGALG00000002678	8.00872	2.51951	3.13389	1.79566	8.09965	6.20713
ENSGALG00000002679	1.07901	0.779039	1.2813	2.7289	1.06387	1.38282
ENSGALG00000002682	8.21849	8.71098	7.0348	7.36513	7.93768	7.62236
ENSGALG00000002683	22.779	27.2508	36.7627	31.3721	24.5688	21.1059
ENSGALG00000002686	8.56101	8.07287	7.54441	8.62709	8.70873	8.28415
ENSGALG00000002688	0.782568	0.63049	0.610239	0.632358	0.440628	0.782328
ENSGALG00000002689	15.9222	16.4497	27.9592	10.8374	17.3273	14.6008
ENSGALG00000002690	6.22678	6.64082	6.67674	5.55225	5.07509	5.05773
ENSGALG00000002693	11.7488	10.2381	12.01	11.0894	15.1998	11.5866
ENSGALG00000002695	9.46073	9.79534	11.3804	14.5499	9.68773	10.2961
ENSGALG00000002699	14.1492	12.5515	12.2613	8.44759	14.0635	11.3395
ENSGALG00000002701	26.129	32.241	40.6725	23.4347	31.2233	28.7033
ENSGALG00000002703	33.459	39.0905	41.3239	39.5055	40.0108	35.1463
ENSGALG00000002705	34.2356	46.3029	48.4668	43.267	41.5639	43.1532
ENSGALG00000002706	3.56197	3.98383	3.12404	3.05095	2.52345	3.65425
ENSGALG00000002707	2.1921	2.58308	1.17918	3.69068	1.3714	1.98524
ENSGALG00000002708	15.4236	14.9495	12.8961	12.4902	19.2284	12.4053
ENSGALG00000002709	45.8141	38.5406	32.923	33.0344	39.5606	35.493
ENSGALG00000002710	6.30085	5.75132	10.7875	6.19225	5.41556	5.66329
ENSGALG00000002714	0.567239	0.263889	0.452775	0.45557	0.540598	0.420869
ENSGALG00000002719	19.7018	23.351	25.3703	21.3497	22.4611	22.3443
ENSGALG00000002722	4.67557	9.72349	5.28468	14.5619	3.24561	4.96032
ENSGALG00000002723	3.77107	3.37754	3.229	4.1349	4.54246	4.22438
ENSGALG00000002725	10.4725	9.97187	9.28594	7.1894	11.2695	11.0483
ENSGALG00000002726	36.7106	26.3391	30.3175	27.3015	29.4762	31.2505
ENSGALG00000002728	0.39244	0.589508	0.453971	0.256468	0.355847	0.617843
ENSGALG00000002729	3.94241	6.2901	5.0806	3.52157	3.27442	4.07981
ENSGALG00000002734	29.5287	33.8172	59.2782	31.5579	33.4504	33.1212
ENSGALG00000002735	10.6609	11.692	15.591	14.9419	12.1373	10.2772
ENSGALG00000002739	19.0989	16.6017	16.7923	16.9022	17.579	16.5473
ENSGALG00000002742	0.692577	0.400181	1.84972	1.12849	0.978141	1.37956
ENSGALG00000002744	0.0340499	0.0522516	0.442734	0.00693717	0.0791389	0.115923
ENSGALG00000002750	46.0242	47.1832	38.4688	31.6936	43.7445	43.2451
ENSGALG00000002759	17.2224	12.5334	15.9102	9.87523	10.2883	14.9578
ENSGALG00000002761	9.73907	7.86719	6.61866	8.87413	8.38258	8.88636
ENSGALG00000002762	6.76174	6.19262	6.97707	6.26454	6.25455	6.31149
ENSGALG00000002763	46.3357	40.3654	42.1596	44.4555	46.3269	44.1665
ENSGALG00000002764	103.021	119.508	91.545	73.2786	109.603	94.5278
ENSGALG00000002765	16.4202	16.0002	18.8955	19.1331	15.7007	19.8195
ENSGALG00000002766	0.49159	0.699949	0.456596	0.549326	0.592091	0.430477
ENSGALG00000002769	4.62402	3.75569	6.91626	13.5882	6.3265	6.25038
ENSGALG00000002771	130.303	174.667	119.518	200.063	132.425	151.456
ENSGALG00000002773	34.6476	40.6457	38.2374	33.8084	40.3433	35.843
ENSGALG00000002774	121.518	152.334	148.703	149.415	138.433	125.044
ENSGALG00000002775	0.857985	1.65426	2.75128	0.540355	0.66601	0.722841
ENSGALG00000002781	5.74669	5.55289	18.6346	3.38223	6.82961	6.35304
ENSGALG00000002783	8.15296	16.4815	13.7576	19.1869	7.88724	10.0843
ENSGALG00000002784	11.2041	12.9564	12.6472	13.8953	10.928	11.6248
ENSGALG00000002786	0.695737	0.860353	0.764331	2.16227	0.945521	0.886839
ENSGALG00000002789	2.17209	3.77422	2.42818	3.76361	2.21477	2.82761
ENSGALG00000002790	3.29125	4.59425	3.66316	4.14128	4.07682	5.28148
ENSGALG00000002797	50.6747	62.9376	50.4315	47.324	57.3076	58.6413
ENSGALG00000002798	3.37119	3.15682	4.60867	4.48388	3.69189	3.66355
ENSGALG00000002800	0.364221	0.262612	0.58431	0.482009	0.220424	0.241228
ENSGALG00000002802	0.922064	2.80876	1.2922	1.45469	1.22174	2.07024
ENSGALG00000002803	32.03	33.101	32.1425	34.0037	32.8287	29.4728
ENSGALG00000002804	0.618689	0.397421	2.68015	0.665489	0.375984	0.736539
ENSGALG00000002813	1318.4	1628.29	1534.77	1633.27	1260.82	1493.54
ENSGALG00000002816	4.61448	6.95675	8.01131	9.35796	4.70085	5.86592
ENSGALG00000002818	41.4027	42.117	48.0081	30.9832	37.6066	44.4514
ENSGALG00000002820	7.40223	5.45115	6.21013	9.14586	5.90307	8.77063
ENSGALG00000002827	13.479	15.5002	20.5136	13.0505	15.8647	15.654
ENSGALG00000002830	13.8814	18.0835	19.7479	12.7339	13.4949	15.0564
ENSGALG00000002831	17.161	19.4046	17.0274	19.1164	17.5414	18.8521
ENSGALG00000002832	13.1666	16.9374	14.7232	19.0118	12.2995	13.0507
ENSGALG00000002836	9.93687	12.097	9.6854	8.73259	9.74489	11.13
ENSGALG00000002837	489.183	566.472	579.69	653.462	573.901	562.952
ENSGALG00000002840	1.43369	1.07726	1.60673	1.26886	1.70124	1.50016
ENSGALG00000002841	7.94327	7.80266	17.3443	8.28795	7.88287	9.08387
ENSGALG00000002843	3.81624	3.75601	7.94378	5.4086	3.75095	4.55262
ENSGALG00000002845	0.118197	0.0630441	1.00263	0.0783868	0.150026	0.108728
ENSGALG00000002846	13.7973	10.0077	19.0253	10.1578	15.3623	14.1947
ENSGALG00000002849	7.75128	13.5712	12.244	19.9276	9.53534	11.4346
ENSGALG00000002850	4.92742	4.81386	5.41387	4.97643	5.57065	5.53869
ENSGALG00000002853	17.3335	18.962	16.3942	18.8805	16.8532	17.2084
ENSGALG00000002854	6.12646	7.70698	4.09663	7.20022	4.30717	7.09522
ENSGALG00000002855	2.40075	2.92355	1.80066	1.63236	1.11022	1.63788
ENSGALG00000002856	14.3132	17.5016	18.988	18.5026	15.2351	15.7687
ENSGALG00000002861	6.64365	6.46492	10.5533	8.20347	8.24816	6.92905
ENSGALG00000002863	61.6363	68.5588	64.2164	55.6966	68.216	71.0956
ENSGALG00000002864	0.183546	0.0659846	0.0313873	0.0500537	0.0918398	0.0719548
ENSGALG00000002866	6.62154	5.59785	5.84463	5.62495	7.36431	6.62241
ENSGALG00000002868	338.292	540.165	493.253	562.826	373.988	429.683
ENSGALG00000002870	11.6703	10.3753	10.4963	10.5743	13.711	11.3099
ENSGALG00000002877	2.76122	2.46231	3.23351	3.53989	3.39434	3.08202
ENSGALG00000002878	2.71924	3.46041	4.09039	5.61791	2.16738	3.20373
ENSGALG00000002880	13.8044	12.527	12.6091	12.9331	13.209	15.1441
ENSGALG00000002881	13.9939	18.1299	19.9277	16.548	14.3433	17.9367
ENSGALG00000002882	7.00694	7.00408	9.21553	9.10806	6.88196	7.89222
ENSGALG00000002883	2.18141	2.28704	4.95848	2.38224	2.16294	2.78426
ENSGALG00000002886	0	0.0697891	0.336797	0	0.0369827	0
ENSGALG00000002888	1.04655	0.997613	1.10252	2.81924	1.45946	2.14955
ENSGALG00000002891	65.3044	87.5037	61.2376	69.9237	73.7717	69.4007
ENSGALG00000002892	1.94907	1.66953	2.2788	2.19389	1.99456	1.76901
ENSGALG00000002893	11.0699	13.1168	7.26258	6.45041	15.551	13.3198
ENSGALG00000002897	0.505787	0.210873	0.220674	0.60281	0.32377	0.145638
ENSGALG00000002899	25.1026	30.1532	24.8669	12.5076	33.1488	33.38
ENSGALG00000002900	1.44691	1.06694	2.38126	1.33231	0.962292	2.24756
ENSGALG00000002904	11.9669	8.909	14.9282	9.96279	12.8623	12.7997
ENSGALG00000002906	47.0561	41.0669	38.3469	41.8453	52.7785	46.5422
ENSGALG00000002907	0.154818	0.104995	0.037192	0	1.09128	0.0487228
ENSGALG00000002908	6.63336	6.90544	9.45375	5.01492	7.47263	5.34875
ENSGALG00000002911	4.59708	3.03201	3.51807	3.01057	7.84869	3.87268
ENSGALG00000002913	46.738	43.5886	37.1043	36.8772	44.6336	46.2604
ENSGALG00000002919	9.89061	11.2223	13.4331	11.0984	9.53228	9.29265
ENSGALG00000002921	12.6858	12.4645	16.4459	9.3896	14.3396	13.9057
ENSGALG00000002922	34.8303	29.2902	30.9367	23.5522	32.5437	28.9573
ENSGALG00000002925	76.7043	76.654	70.9944	65.6306	74.1884	75.938
ENSGALG00000002929	26.6291	30.2374	32.6601	28.1286	23.665	27.3877
ENSGALG00000002932	517.328	658.22	556.76	566.725	554.53	561.419
ENSGALG00000002937	60.1399	68.8268	63.5213	48.1537	62.7445	61.3075
ENSGALG00000002942	8.33626	7.21212	7.45789	7.04287	7.18354	8.39738
ENSGALG00000002943	34.7085	39.742	32.8996	28.9966	35.0784	33.1086
ENSGALG00000002944	0.239633	0.288467	0.309593	0.361423	0.186654	0.226286
ENSGALG00000002945	2.00621	1.99176	1.72683	2.12156	2.01696	1.77586
ENSGALG00000002952	1.48198	2.64479	2.5178	4.11244	1.68646	1.61876
ENSGALG00000002954	6.96626	5.77818	7.03354	6.66633	6.33746	6.54363
ENSGALG00000002955	14.4446	9.16075	10.6777	15.6094	13.5093	12.8794
ENSGALG00000002957	0.171625	0.0535499	0.0682466	0.193645	0	0.0700825
ENSGALG00000002958	3.18495	1.89129	5.62491	1.21317	3.50298	4.45265
ENSGALG00000002959	7.26023	8.20104	9.9045	10.7845	7.16468	8.07586
ENSGALG00000002960	0.430689	0.205353	0.237001	0.0822226	0.221086	0.162787
ENSGALG00000002963	20.3299	19.767	30.4017	13.3488	24.2717	26.2775
ENSGALG00000002964	8.10149	7.26237	10.0445	7.34709	8.35461	8.85805
ENSGALG00000002967	8.81283	7.88957	9.90813	7.31052	12.6267	9.5892
ENSGALG00000002968	2.20708	2.07921	2.66139	2.53587	2.53728	1.86233
ENSGALG00000002969	10.9689	11.388	9.70242	10.1091	12.4921	9.87308
ENSGALG00000002971	7.38815	5.3613	6.03156	6.04282	7.29152	7.31381
ENSGALG00000002973	16.639	15.7068	17.6557	16.3173	17.1927	17.738
ENSGALG00000002974	0.126421	0.0862894	0.246847	0.215151	0.0481084	0.165792
ENSGALG00000002980	2.55243	1.63436	2.65733	1.17706	2.02308	2.4187
ENSGALG00000002981	4.80659	4.45982	5.78071	4.90398	3.97073	4.85556
ENSGALG00000002982	1.12372	2.20744	0.773248	4.94575	1.00999	1.6391
ENSGALG00000002984	14.2132	18.017	20.2338	21.5436	18.6067	17.0455
ENSGALG00000002985	13.7861	10.9366	13.9163	11.9493	15.6368	15.2927
ENSGALG00000002987	10.2443	11.9316	10.0607	15.1466	8.87153	8.84265
ENSGALG00000002988	0.842012	1.31198	0.875217	0.516252	2.14905	6.07724
ENSGALG00000002990	191.968	229.754	204.922	202.626	193.485	198.146
ENSGALG00000002992	0.385561	0.46358	1.05513	0.488672	0.327794	0.541844
ENSGALG00000002993	44.3748	56.0223	36.7877	44.6477	28.4867	37.8958
ENSGALG00000003003	0.574148	0.688098	0.0805619	0.0779226	0.321852	0.397397
ENSGALG00000003010	14.3272	13.4711	13.6752	10.994	16.7409	15.0789
ENSGALG00000003011	26.6561	26.2422	15.1439	25.9297	23.572	15.8143
ENSGALG00000003013	0.316909	0.263097	0.424796	0.103383	0.0722883	0.140747
ENSGALG00000003015	133.245	103.211	80.4037	83.4005	87.4038	107.076
ENSGALG00000003016	0.110516	0.0664772	0.299268	0.169654	0.0786893	0.243831
ENSGALG00000003021	1.15851	1.10925	1.38484	0.98618	1.22171	1.21056
ENSGALG00000003022	1.72719	1.92749	0.958967	0.94993	1.16661	1.39107
ENSGALG00000003024	8.79567	9.67754	12.6468	7.77006	9.28262	8.75582
ENSGALG00000003025	0.266979	0.551498	0.563677	0.423549	0.487032	0.615263
ENSGALG00000003026	8.08172	7.49327	8.51451	7.34977	7.59104	9.9334
ENSGALG00000003029	9.52558	11.7891	12.812	9.23118	9.11354	11.7487
ENSGALG00000003031	9.97279	9.48179	15.5363	9.95362	10.734	12.1218
ENSGALG00000003033	5.40081	5.04307	6.20467	5.02385	6.15621	6.04813
ENSGALG00000003034	0.298318	0.947986	0.175284	2.21802	0	0.352707
ENSGALG00000003035	1.95053	0.98957	3.93912	1.32592	1.69161	2.15972
ENSGALG00000003039	31.8689	27.7833	21.8441	18.8535	34.917	31.6925
ENSGALG00000003042	12.6646	12.5658	12.9826	15.1151	14.0008	12.378
ENSGALG00000003045	16.7871	15.8213	13.5257	11.2172	16.1284	14.0663
ENSGALG00000003046	92.3414	109.833	85.463	79.0492	94.8984	92.129
ENSGALG00000003047	9.01946	10.8194	12.2171	14.4683	7.69617	10.5695
ENSGALG00000003052	54.1224	70.6305	62.3593	47.7704	53.3037	53.738
ENSGALG00000003053	118.301	162.766	183.183	143.129	121.557	122.821
ENSGALG00000003058	0.194207	0.691799	1.19544	0.942293	0.477829	0.286085
ENSGALG00000003059	9.51364	11.4686	10.9929	10.9112	9.51106	8.55138
ENSGALG00000003063	2.82081	2.79526	2.69211	3.23774	3.41422	2.77381
ENSGALG00000003065	3.47993	3.55728	3.78229	3.4083	3.39761	3.2963
ENSGALG00000003067	36.5394	53.0118	42.5475	47.3137	44.2941	43.3294
ENSGALG00000003068	7.22401	5.87498	8.27762	8.0527	7.20686	7.16946
ENSGALG00000003071	7.27247	6.80431	7.34804	7.29643	7.31732	7.28497
ENSGALG00000003072	36.2967	45.3765	39.1088	31.1605	37.9751	36.506
ENSGALG00000003073	1.2846	1.17763	0.603113	0.94125	0.983089	1.25118
ENSGALG00000003074	12.3632	11.2479	14.9817	9.80365	14.2878	13.1737
ENSGALG00000003076	0.186313	0.124088	0.187236	0.234541	0.168545	0.187391
ENSGALG00000003078	107.782	97.5423	67.4744	84.299	95.5643	96.4741
ENSGALG00000003079	20.5359	25.9473	30.9601	32.9698	22.3894	23.4554
ENSGALG00000003081	15.0233	16.9524	18.9973	14.1058	15.3649	17.0557
ENSGALG00000003082	10.9692	11.8178	9.5574	10.2565	10.1259	11.0653
ENSGALG00000003084	36.9902	40.2226	36.1556	34.0106	43.7433	43.4599
ENSGALG00000003085	91.7526	103.143	97.752	41.6271	123.418	95.4881
ENSGALG00000003086	10.9149	9.55951	9.44313	10.8112	11.5169	10.8125
ENSGALG00000003091	12.1568	12.7157	15.826	9.28852	13.8574	12.8445
ENSGALG00000003092	53.5985	61.5367	64.4239	42.4261	56.1082	56.1049
ENSGALG00000003096	3.41342	2.26492	4.42422	2.61753	3.84814	2.92168
ENSGALG00000003099	3.72746	7.26577	9.29374	7.01162	3.74112	5.15789
ENSGALG00000003101	13.8775	18.0982	23.6451	11.7113	15.0257	17.0323
ENSGALG00000003103	1.93481	3.25441	2.44219	3.6221	1.9451	1.62077
ENSGALG00000003106	28.0278	37.7326	26.798	42.8768	33.4211	28.2723
ENSGALG00000003107	15.093	16.1127	14.0808	15.8791	15.6871	14.4358
ENSGALG00000003108	17.5281	15.575	15.8437	13.6265	17.9889	16.5795
ENSGALG00000003111	7.51049	9.15363	11.2751	9.15598	8.66214	7.89309
ENSGALG00000003113	7.31524	5.15408	5.02925	5.45735	8.30939	6.62065
ENSGALG00000003114	10.247	18.7267	12.376	22.5266	10.5573	10.8153
ENSGALG00000003118	11.5092	5.66415	6.93798	5.19983	8.97445	7.2378
ENSGALG00000003120	15.6123	22.1813	16.8149	19.7847	16.8735	19.1418
ENSGALG00000003122	13.8449	17.4682	34.618	14.0243	16.7743	16.9649
ENSGALG00000003123	11.429	5.44867	4.7544	6.50545	8.07854	6.76758
ENSGALG00000003124	3.37624	3.91263	4.2922	3.63867	3.50831	3.1778
ENSGALG00000003126	0.774293	0.631241	2.21516	0.288349	0.583055	0.717056
ENSGALG00000003128	23.3523	31.9487	20.7022	30.2882	29.8502	30.5831
ENSGALG00000003129	7.27546	6.54904	9.92202	8.71914	7.27148	7.32443
ENSGALG00000003130	11.2128	15.4783	15.6193	11.232	13.9694	13.3425
ENSGALG00000003131	4.17314	4.91255	6.36293	4.33732	3.45272	5.72591
ENSGALG00000003135	2.58952	2.46897	6.42543	2.27376	2.79682	3.37843
ENSGALG00000003136	1.23499	1.77912	3.41588	2.1488	1.0022	1.62824
ENSGALG00000003137	5.49034	6.49518	5.18327	2.66773	8.56909	9.13657
ENSGALG00000003138	0.245867	0.122042	0.477316	0.28902	0.282641	0.251022
ENSGALG00000003142	0.154359	0.198028	0	0	0.0673479	0.127136
ENSGALG00000003143	18.5247	17.4303	21.897	17.3964	18.3431	16.3785
ENSGALG00000003144	23.887	38.6124	30.653	30.0887	25.4363	25.2264
ENSGALG00000003146	6.80501	5.79137	7.198	7.4273	5.57351	7.05697
ENSGALG00000003147	33.7677	41.4546	34.3765	34.5656	31.8581	33.0665
ENSGALG00000003148	1.279	1.34376	4.13095	1.40365	1.49197	1.92381
ENSGALG00000003149	4.69701	3.45668	2.86433	2.75043	4.75024	4.1733
ENSGALG00000003153	69.733	77.2035	75.8658	59.1418	92.0802	86.1223
ENSGALG00000003154	10.7909	10.4399	14.6396	8.60774	14.1804	11.8675
ENSGALG00000003155	0.878916	0.968277	0.864979	1.12397	1.09052	0.797997
ENSGALG00000003160	10.4688	9.95468	13.5564	4.6078	8.22143	11.7567
ENSGALG00000003161	6.703	8.63736	8.23515	3.79844	5.22711	7.30036
ENSGALG00000003162	15.2599	16.9712	16.8095	15.842	13.4612	14.3088
ENSGALG00000003163	29.8146	35.3709	15.0405	13.8333	28.834	25.0303
ENSGALG00000003164	0.0901225	0.478519	0.562343	0.219729	0.0570559	0.223387
ENSGALG00000003165	15.568	15.1425	16.1871	11.5925	14.8208	14.7959
ENSGALG00000003168	3.71953	3.77325	8.89794	3.23951	3.22815	4.26179
ENSGALG00000003169	57.2241	65.2502	52.3316	57.0086	54.012	48.0728
ENSGALG00000003172	12.0853	11.863	16.1996	11.5594	8.521	8.87855
ENSGALG00000003175	1.22502	0.753831	4.88704	1.78968	1.84985	1.95492
ENSGALG00000003176	0.114869	0.156923	0.369576	0	0.144555	0.145071
ENSGALG00000003179	3.36428	1.06098	0.207352	0.689467	0.70593	1.30428
ENSGALG00000003181	10.5779	12.8449	14.3808	11.8182	13.1408	11.2267
ENSGALG00000003183	7.51522	7.15221	8.96455	8.07523	7.8553	7.19232
ENSGALG00000003185	59.7118	88.0555	72.2583	75.1059	45.4743	58.2307
ENSGALG00000003189	31.0664	39.0685	38.002	40.5573	34.0986	32.6539
ENSGALG00000003193	0	0	0.448928	0.193385	0.137261	0.324357
ENSGALG00000003194	18.7477	17.6907	26.6164	16.8206	21.576	18.8076
ENSGALG00000003195	3.54137	3.82544	3.1439	3.12281	3.24444	2.91537
ENSGALG00000003196	5.0848	7.74711	4.75022	22.2519	3.99457	6.41843
ENSGALG00000003197	594.631	861.769	786.292	680.872	656.83	760.195
ENSGALG00000003199	44.9566	28.4019	33.7444	51.2242	44.1838	44.3794
ENSGALG00000003201	6.80103	4.78995	6.52837	6.80328	7.6701	6.7688
ENSGALG00000003203	5.39894	3.74516	2.0869	3.48921	6.68325	3.64028
ENSGALG00000003204	15.578	22.2867	27.8879	20.0304	17.4424	20.7935
ENSGALG00000003205	62.7798	87.4236	102.414	89.966	76.7071	77.3861
ENSGALG00000003206	3.37507	2.72121	3.41315	2.28523	3.54584	3.1959
ENSGALG00000003208	17.0618	25.5973	25.3886	26.7689	17.5192	18.1129
ENSGALG00000003211	16.6791	21.8708	22.7338	19.8913	16.1916	17.3761
ENSGALG00000003212	0.28203	0.216913	0.128376	0.446193	0.260603	0.582369
ENSGALG00000003213	1.76187	1.94725	0.991826	1.35839	1.37255	1.6176
ENSGALG00000003217	0.852962	1.7048	7.53948	1.6325	0.80077	1.10156
ENSGALG00000003219	13.2142	11.5824	12.4265	13.7294	11.14	12.4395
ENSGALG00000003220	23.1803	22.6375	23.0121	18.4515	23.3816	21.7426
ENSGALG00000003221	22.7029	27.5805	22.4705	23.3782	25.057	29.2932
ENSGALG00000003226	5.22778	4.34714	4.2045	5.29343	6.82721	7.38768
ENSGALG00000003227	17.7591	36.4293	31.1461	25.5612	12.1094	18.3606
ENSGALG00000003228	17.4282	19.6607	34.765	19.2872	18.078	19.8881
ENSGALG00000003233	55.2323	41.9909	31.2416	31.9782	44.3158	36.8666
ENSGALG00000003235	7.08272	6.82555	5.75162	5.77119	6.98952	8.33977
ENSGALG00000003238	30.8069	30.4547	25.2901	23.31	27.9297	25.851
ENSGALG00000003241	3.97927	3.53481	3.21321	4.51812	2.93955	4.05576
ENSGALG00000003242	596.308	292.557	134.639	123.411	349.78	304.986
ENSGALG00000003243	7.26656	5.91032	5.00722	5.42402	7.30469	6.3457
ENSGALG00000003245	30.8314	36.6736	24.407	27.0394	26.3146	28.5276
ENSGALG00000003247	18.328	20.2149	21.6231	20.0528	19.5736	20.2065
ENSGALG00000003248	35.9764	36.1136	35.4858	31.0852	37.3014	37.3679
ENSGALG00000003249	24.6153	27.4705	27.7237	26.0679	25.7254	25.9854
ENSGALG00000003250	12.4347	16.6336	19.2337	13.1577	16.0881	16.4609
ENSGALG00000003254	15.137	16.2188	18.4606	17.4988	15.9369	15.9708
ENSGALG00000003256	24.0093	20.8865	31.5655	23.7788	23.1079	24.0617
ENSGALG00000003258	0.696748	1.27761	2.02403	1.27659	0.886754	1.32837
ENSGALG00000003259	9.6616	11.1218	10.0057	8.83573	10.157	10.4263
ENSGALG00000003260	12.2027	13.1369	20.9925	11.1341	14.2595	12.7741
ENSGALG00000003261	181.302	301.397	231.184	250.165	175.899	202.718
ENSGALG00000003265	69.854	66.9159	63.8064	60.7779	61.1184	62.5881
ENSGALG00000003267	33.7165	41.0197	34.0387	35.445	34.824	32.4809
ENSGALG00000003272	31.1403	31.221	23.206	23.9479	34.2212	27.3521
ENSGALG00000003273	8.49997	8.37019	14.0005	8.50302	9.34969	9.78022
ENSGALG00000003281	15.5003	21.2314	17.2698	20.0557	14.7372	14.2385
ENSGALG00000003282	18.3501	24.2248	23.3023	25.219	16.6712	18.4155
ENSGALG00000003283	1.92069	0.576718	0.73963	1.77154	0.98181	0.851979
ENSGALG00000003284	19.0344	18.3898	22.5756	23.296	18.2747	20.0608
ENSGALG00000003285	0.172445	0.159128	0.180598	0.238486	0.0860327	0.0714645
ENSGALG00000003286	0.0985605	0.150214	0.312604	0.620168	0.475231	0.125367
ENSGALG00000003287	11.8577	11.9098	12.8051	11.3005	9.96553	9.92571
ENSGALG00000003288	15.6061	15.074	20.9696	10.0535	18.1872	16.8935
ENSGALG00000003293	27.669	32.4716	27.4168	29.2193	26.0652	26.115
ENSGALG00000003294	2.61429	2.73373	3.20209	2.14166	2.25176	2.49593
ENSGALG00000003295	2.87293	3.44739	3.00495	2.40163	2.19973	3.40038
ENSGALG00000003297	23.9487	28.6205	23.9377	22.8849	26.0745	24.3198
ENSGALG00000003298	5.47871	3.70914	4.96806	4.65702	5.39605	5.24081
ENSGALG00000003299	8.43584	8.59583	9.99221	8.00692	7.76402	8.17999
ENSGALG00000003301	3.61269	0	3.65472	0	1.91842	0
ENSGALG00000003304	6.63599	6.07872	7.51682	5.96019	8.50392	7.11615
ENSGALG00000003307	181.617	216.758	169.684	189.34	186.805	188.813
ENSGALG00000003308	15.1499	14.3751	17.2617	14.5159	16.9714	16.9407
ENSGALG00000003310	0.22901	0.0251506	0.0946861	0.0232385	0.0974023	0.49625
ENSGALG00000003313	3.91314	4.34219	3.48392	5.85653	3.98197	4.20445
ENSGALG00000003314	15.23	16.7304	14.7551	12.0382	17.8664	15.1944
ENSGALG00000003318	3.99349	4.02753	4.81646	4.64299	3.71695	3.92427
ENSGALG00000003319	0.793452	0.878516	0.401195	3.01685	0.605274	0.771494
ENSGALG00000003321	19.7198	24.423	19.5357	18.7394	19.3651	19.0658
ENSGALG00000003322	8.41495	9.75018	14.186	7.81461	7.69466	9.74716
ENSGALG00000003323	2.97616	3.61953	5.98899	4.7959	2.47522	3.21691
ENSGALG00000003324	8.61687	2.26043	3.79653	12.2581	4.95675	4.33326
ENSGALG00000003325	8.40895	9.10588	18.7848	6.61623	10.2018	9.92293
ENSGALG00000003326	3.82815	4.94338	4.2042	4.56262	4.04835	4.26152
ENSGALG00000003329	14.0771	11.7935	11.3696	13.0802	13.3112	14.178
ENSGALG00000003331	21.5986	26.229	39.382	19.2236	25.1456	23.2118
ENSGALG00000003333	4.85681	4.26745	6.16758	7.59467	4.98823	6.11085
ENSGALG00000003336	0.49645	1.02619	0.958845	0.961691	0.830273	1.70907
ENSGALG00000003337	78.5268	101.1	100.185	80.7854	88.7459	100.792
ENSGALG00000003339	6.52249	6.46675	6.05326	4.85451	5.61865	5.83565
ENSGALG00000003340	4.21283	6.36086	5.84922	6.14903	4.22259	5.3846
ENSGALG00000003344	93.5545	126.703	135.403	96.5218	93.7224	90.0066
ENSGALG00000003345	1.99395	2.54225	2.02691	3.71076	1.59493	2.51114
ENSGALG00000003348	50.7515	83.5392	88.0957	88.8528	54.2129	75.6522
ENSGALG00000003349	2.77334	2.67361	6.40497	5.04648	2.1415	2.50473
ENSGALG00000003353	16.1145	16.1813	17.8168	14.6601	16.6726	17.4763
ENSGALG00000003354	0.0969118	0.19607	0.113357	0.493279	0.106284	0.236001
ENSGALG00000003355	16.3888	21.0758	21.5932	17.4508	20.1724	18.3184
ENSGALG00000003356	8.39798	12.2089	9.93942	11.6827	7.55418	9.77765
ENSGALG00000003357	18.8867	22.9518	22.8163	17.3422	18.8654	20.6074
ENSGALG00000003358	31.2888	32.6196	31.2244	24.6809	25.4202	27.1537
ENSGALG00000003359	71.4889	94.4954	105.293	83.3977	80.332	84.9285
ENSGALG00000003360	1.40551	2.74551	1.71843	2.86151	1.79372	1.87853
ENSGALG00000003361	0.180962	0.191677	0.354575	0.489876	0.104507	0.272047
ENSGALG00000003362	13.0106	15.3529	13.6125	12.684	11.8217	12.6256
ENSGALG00000003365	5.39748	5.79543	5.52981	5.18054	5.79544	6.034
ENSGALG00000003369	11.4359	13.2104	13.8069	11.9237	10.5126	10.8251
ENSGALG00000003370	14.7436	19.6658	34.5085	16.4269	17.9322	17.0478
ENSGALG00000003373	14.4775	18.2549	20.8384	13.0033	17.3654	17.0513
ENSGALG00000003374	0.30234	0.345185	2.27064	0.298393	0.214104	0.297653
ENSGALG00000003377	6.38226	5.89415	5.13656	6.94925	7.22975	5.77862
ENSGALG00000003378	2.49635	1.68776	1.72025	1.97555	2.76543	3.58682
ENSGALG00000003381	4.86745	4.88986	5.98525	5.05168	3.48276	4.06135
ENSGALG00000003383	19.0811	18.6844	29.3676	18.372	21.0375	21.6025
ENSGALG00000003385	20.2112	21.0619	23.304	15.5015	25.0556	19.0249
ENSGALG00000003387	3.36169	3.34722	10.5087	4.1535	5.57844	4.04167
ENSGALG00000003391	6.39522	6.73232	9.17594	9.3167	7.13591	7.55813
ENSGALG00000003392	16.0739	16.4777	18.9122	15.0161	15.3787	15.8534
ENSGALG00000003396	14.0513	13.6204	11.5932	10.9981	10.8812	13.1853
ENSGALG00000003397	17.7991	18.3365	19.6483	15.7702	17.014	16.4744
ENSGALG00000003398	19.5437	20.0125	22.8797	18.2454	18.6495	18.7408
ENSGALG00000003400	28.921	40.2842	36.9647	23.4759	33.2365	37.423
ENSGALG00000003403	0.20154	0.239591	4.62214	0.262883	0.17432	0.356756
ENSGALG00000003405	12.1101	13.639	19.1404	15.2145	11.4219	11.6034
ENSGALG00000003408	7.28845	4.57774	6.9102	7.20563	7.21206	5.87665
ENSGALG00000003409	7.28925	4.18906	5.15847	4.90237	7.63056	5.96677
ENSGALG00000003412	8.1225	8.60568	6.76684	8.72645	8.72685	6.64016
ENSGALG00000003416	11.8311	9.51987	11.4877	12.4228	12.1303	9.60441
ENSGALG00000003419	2.50766	2.49634	4.13173	2.76068	2.98237	3.12726
ENSGALG00000003420	7.92016	6.70244	8.16682	5.98841	9.40818	7.66073
ENSGALG00000003426	0.74282	1.05097	1.59883	3.07589	0.511371	1.25883
ENSGALG00000003427	11.5973	10.6271	17.686	8.82841	11.2117	12.5223
ENSGALG00000003428	28.0039	28.1976	26.7154	28.5334	27.5588	23.9457
ENSGALG00000003429	31.4995	25.4528	27.4649	21.6066	25.9785	27.8731
ENSGALG00000003430	7.02354	5.267	9.07808	4.27478	6.60775	6.66318
ENSGALG00000003432	6.03842	8.58907	5.42049	4.6172	3.27255	4.07799
ENSGALG00000003433	3.46215	6.13567	14.4443	8.52557	3.32921	4.67806
ENSGALG00000003434	17.6053	17.0342	15.6795	15.5265	15.3477	13.6629
ENSGALG00000003435	0.310874	0.0719459	1.0256	0.386302	0.2224	0.454728
ENSGALG00000003438	19.2179	24.2161	33.8003	15.6433	26.5671	22.0789
ENSGALG00000003439	18.2623	18.2526	18.7382	17.3706	19.027	15.2904
ENSGALG00000003441	2.28335	3.23656	2.36792	2.89558	2.24654	2.6465
ENSGALG00000003443	4.69299	6.97286	2.98489	6.46397	6.39595	5.61893
ENSGALG00000003445	57.2586	83.0063	67.3952	128.876	66.2589	76.8812
ENSGALG00000003446	0.241865	0.798994	0.367119	0.771102	0.110241	0.335091
ENSGALG00000003447	5.90075	3.75867	6.63195	7.30269	5.42238	5.74177
ENSGALG00000003454	69.9473	89.3259	78.656	69.6881	80.2005	72.4035
ENSGALG00000003456	0.294892	0	0	0	0.107941	0
ENSGALG00000003457	26.1118	33.4793	29.3719	37.4846	29.2263	29.1942
ENSGALG00000003458	17.653	19.7735	25.5102	18.331	19.4772	19.3956
ENSGALG00000003461	3.22316	2.61909	3.53047	3.11869	1.65929	3.81773
ENSGALG00000003464	0.136397	0.08263	0.169973	0.0530191	0.1511	0.233736
ENSGALG00000003466	3.38787	2.38517	2.38314	4.29406	2.39817	2.88587
ENSGALG00000003467	19.5492	24.9262	22.6303	20.2732	18.996	18.5878
ENSGALG00000003470	0.485804	0.164189	0.785449	0.289181	0.236341	0.349249
ENSGALG00000003472	2.59483	3.27195	2.44209	3.77566	2.35788	3.58032
ENSGALG00000003473	18.7435	13.5066	21.8711	8.64326	22.9016	18.0769
ENSGALG00000003474	21.4275	27.8638	31.9032	26.7487	22.5561	23.9776
ENSGALG00000003475	53.9716	59.1733	46.0759	24.5289	64.0643	54.309
ENSGALG00000003476	6.2594	6.6262	5.77629	6.56052	6.79288	6.03901
ENSGALG00000003478	0.18151	0.139705	0.0654849	0.228079	0	0.0970985
ENSGALG00000003483	49.2527	52.7886	61.7822	54.6392	49.9253	53.942
ENSGALG00000003484	5.69773	6.53334	11.6423	4.14238	5.94083	6.37873
ENSGALG00000003485	13.0805	12.5914	15.1964	12.534	10.9148	11.2621
ENSGALG00000003487	26.5753	35.1856	35.9555	30.9972	29.4973	30.5297
ENSGALG00000003492	33.0951	35.2705	30.2111	28.9646	31.8144	31.2562
ENSGALG00000003495	69.1835	96.8651	90.2799	89.6298	77.6491	81.1212
ENSGALG00000003496	7.7476	7.93237	11.4937	9.09864	9.43051	8.78124
ENSGALG00000003498	7.37352	8.63338	9.50914	9.08217	8.1413	7.38444
ENSGALG00000003499	3.54414	2.24334	2.42231	2.73291	2.64855	2.82533
ENSGALG00000003500	2.08509	2.90471	3.86792	2.18935	3.23246	2.23528
ENSGALG00000003503	12.1234	11.3023	16.5112	7.51926	13.5699	12.4771
ENSGALG00000003505	6.70845	6.8051	5.9029	6.53075	6.95534	5.95931
ENSGALG00000003507	3.24591	2.56949	4.04657	3.82708	3.03796	3.50271
ENSGALG00000003509	0.177552	0.360685	0	0.109638	0.33614	0.110515
ENSGALG00000003510	31.9071	45.8942	70.0154	32.5017	34.1578	40.651
ENSGALG00000003517	11.6695	11.9544	14.505	21.4679	13.7926	14.6078
ENSGALG00000003518	15.5986	16.8244	17.2332	15.3189	15.6298	14.6703
ENSGALG00000003520	4.91728	3.38809	5.90409	3.66863	2.09602	3.9399
ENSGALG00000003521	685.416	440.196	507.13	262.897	762.879	607.877
ENSGALG00000003522	127.002	147.398	133.869	105.213	138.408	130.224
ENSGALG00000003523	13.2182	13.5316	19.1503	11.4577	12.7614	14.1088
ENSGALG00000003526	10.0505	9.59009	10.7871	11.6289	10.6896	11.2543
ENSGALG00000003527	9.94455	10.4242	14.4451	11.0175	7.58841	7.8396
ENSGALG00000003529	10.5015	9.57439	8.71154	9.76051	12.5789	11.5831
ENSGALG00000003532	249.088	218.501	202.438	213.534	258.497	241.36
ENSGALG00000003533	4.56953	4.5673	6.19581	6.03071	5.34563	5.32568
ENSGALG00000003536	14.6116	13.3653	21.9198	15.8964	15.0404	15.0009
ENSGALG00000003537	12.1548	15.5666	75.5636	11.9273	14.1718	17.4579
ENSGALG00000003539	19.2893	17.9129	19.8489	21.3416	13.9318	18.3107
ENSGALG00000003540	2.61326	2.60797	3.06521	3.09448	2.54483	2.80529
ENSGALG00000003545	0.119418	0.847822	0.239285	0.727388	0.364978	0.440816
ENSGALG00000003547	102.739	174.304	101.399	149.74	110.812	93.1641
ENSGALG00000003548	4.59184	6.96044	10.0173	7.27077	3.67982	4.84088
ENSGALG00000003549	14.4126	16.0788	9.53164	9.2581	8.41452	7.56147
ENSGALG00000003550	11.7964	18.2461	9.75172	17.1218	11.7524	11.3924
ENSGALG00000003553	0.198709	0.153217	0.134458	0.258427	0.0958003	0.158308
ENSGALG00000003554	13.6836	3.52105	6.09769	4.02863	12.78	12.0828
ENSGALG00000003558	22.2327	32.7799	23.2392	34.3122	21.5832	22.0271
ENSGALG00000003559	3.87311	5.44933	17.6674	5.27659	4.41759	5.64543
ENSGALG00000003560	0.560261	0.209539	0.398065	0.674125	0.563679	0.2788
ENSGALG00000003562	9.09139	9.81114	16.8152	6.26095	5.25796	6.49562
ENSGALG00000003563	18.5578	20.6246	18.1575	14.8585	18.6708	18.053
ENSGALG00000003566	4.5762	4.2235	5.79527	3.69611	5.04914	4.7902
ENSGALG00000003567	36.7929	20.2304	16.2805	31.5098	30.1802	32.9378
ENSGALG00000003568	9.94533	9.5937	5.92313	9.38366	6.65975	7.13679
ENSGALG00000003569	8.06467	13.5909	17.783	11.9739	6.52813	8.96946
ENSGALG00000003570	57.1372	69.3047	68.0317	69.1278	53.0785	61.3498
ENSGALG00000003572	4.1696	4.37703	11.4394	3.90556	3.90345	4.5715
ENSGALG00000003573	0.129991	0.111166	0.159236	0.107507	0	0.0535724
ENSGALG00000003574	24.7565	27.5978	30.5744	19.8266	22.6898	21.4248
ENSGALG00000003575	5.00081	6.92604	6.61376	8.87752	3.97907	5.1784
ENSGALG00000003578	323.211	263.534	227.57	226.776	336.659	307.247
ENSGALG00000003580	62.7892	50.3985	47.8853	66.0242	49.1154	49.8513
ENSGALG00000003582	5.81509	6.25943	6.01753	6.04588	4.51818	5.15521
ENSGALG00000003584	93.8038	120.56	141.433	40.0935	127.276	104.735
ENSGALG00000003589	2.88037	15.6402	8.84996	38.6333	3.64762	10.2261
ENSGALG00000003590	2.19679	2.46435	7.32313	1.69993	2.8131	2.88721
ENSGALG00000003594	0.289575	0.655155	0.242795	0.773886	0.328547	0.417272
ENSGALG00000003595	0.523826	0.460446	0.364857	0.592476	0.201321	1.00232
ENSGALG00000003596	8.79874	8.60914	9.08389	7.46882	7.23176	8.75851
ENSGALG00000003597	37.0661	44.6093	38.5035	37.9453	38.6607	42.9987
ENSGALG00000003601	22.5086	19.6234	24.9467	17.7287	22.9438	20.7151
ENSGALG00000003602	0.686963	0.73944	0.982614	0.677759	0.814748	0.633239
ENSGALG00000003604	4.64637	3.69245	4.74803	6.90401	4.54479	4.85194
ENSGALG00000003605	4.22284	3.91729	3.97601	3.73342	3.20906	4.03728
ENSGALG00000003614	2.3391	2.96486	2.0214	4.99389	2.62652	3.1554
ENSGALG00000003624	0.360407	0.0895667	0.170205	0.43113	0.156884	0.322205
ENSGALG00000003625	51.1258	61.7021	53.8514	59.3579	53.2355	50.4237
ENSGALG00000003628	6.02251	5.56425	5.4503	5.8117	5.09722	5.59924
ENSGALG00000003631	1.10361	1.17198	1.80334	0.974786	0.959786	1.02214
ENSGALG00000003634	32.6963	28.5811	28.5696	24.0193	32.2433	30.5838
ENSGALG00000003636	2.15749	3.44701	1.91115	3.29751	2.21027	1.97938
ENSGALG00000003641	8.59892	8.12409	7.98763	7.86569	6.38564	8.28569
ENSGALG00000003642	23.37	20.9075	22.2535	17.8829	27.1022	21.6577
ENSGALG00000003644	0.786694	0.311675	6.91179	1.45853	0.631731	0.750333
ENSGALG00000003645	4.78487	6.83841	10.3117	5.28962	4.18761	4.59976
ENSGALG00000003648	13.5322	14.7847	21.2675	18.1099	12.9175	15.9723
ENSGALG00000003650	12.7047	15.9971	14.0695	12.9282	14.2233	14.5478
ENSGALG00000003651	9.45152	11.1542	10.3283	11.6675	11.5126	9.12873
ENSGALG00000003652	19.5862	21.8487	18.6902	17.3479	22.4686	19.5748
ENSGALG00000003655	18.1998	20.8978	19.1638	16.7283	15.4498	15.4097
ENSGALG00000003657	2.50308	1.90578	1.85249	2.04643	1.49714	3.61931
ENSGALG00000003658	2.91439	3.02045	3.34039	2.57998	3.13758	3.12678
ENSGALG00000003660	7.44147	6.23811	15.8011	6.9108	6.88824	5.40642
ENSGALG00000003661	13.9136	23.74	15.118	19.7216	11.4096	15.8146
ENSGALG00000003663	6.61321	6.37639	5.34402	4.84568	6.04824	5.39666
ENSGALG00000003665	48.7064	68.9681	48.571	58.4173	35.9422	50.4672
ENSGALG00000003670	10.6491	13.5092	12.5039	32.3287	8.89109	10.0734
ENSGALG00000003672	12.4261	12.669	14.7402	11.9782	13.7304	13.4757
ENSGALG00000003674	8.78785	11.2778	10.891	9.96872	7.99532	8.25496
ENSGALG00000003675	11.9905	11.235	12.8794	9.85454	12.9836	12.171
ENSGALG00000003677	4.7836	4.90405	3.79652	3.44729	4.92463	3.94222
ENSGALG00000003681	33.9322	42.7951	29.156	28.3143	38.744	33.5702
ENSGALG00000003682	12.5082	10.6763	11.9708	15.0703	12.7831	11.3727
ENSGALG00000003683	18.4999	23.6343	25.3732	18.5559	17.9793	18.084
ENSGALG00000003684	9.34365	8.08195	12.7106	9.12275	8.96921	8.53802
ENSGALG00000003687	5.78049	3.36741	4.11299	4.73386	5.06245	3.84694
ENSGALG00000003688	11.824	10.9296	9.66389	6.02724	12.6524	11.6968
ENSGALG00000003689	15.1255	21.0161	13.6758	11.8965	16.5425	11.331
ENSGALG00000003690	26.618	49.9568	36.6458	63.6799	44.4365	19.2669
ENSGALG00000003691	19.7787	24.8255	21.5656	20.0945	23.6279	21.7237
ENSGALG00000003693	15.8304	13.0908	13.9746	12.9825	18.2262	17.6498
ENSGALG00000003695	9.50866	10.5039	16.5009	7.1986	9.39767	8.57838
ENSGALG00000003696	9.50294	11.3974	19.4645	10.0276	8.88644	10.0435
ENSGALG00000003699	3.20764	2.43007	3.59745	1.60923	4.03837	3.67759
ENSGALG00000003701	9.30687	8.29038	8.71224	10.7366	9.77299	8.96057
ENSGALG00000003702	43.1042	51.9847	41.8994	39.1976	46.5703	44.3851
ENSGALG00000003703	9.45951	9.95955	12.9013	9.04315	10.5587	10.0827
ENSGALG00000003705	1.59293	1.73281	2.33828	1.64154	0.987692	1.64216
ENSGALG00000003708	5.82746	5.44017	5.33327	5.08879	6.14978	5.91548
ENSGALG00000003709	5.3999	15.2088	17.9784	18.6367	7.25708	10.2094
ENSGALG00000003712	14.0378	11.4657	12.6604	11.6917	12.58	11.3337
ENSGALG00000003713	0.345508	0.162209	0.0509397	0.102679	0.0555996	0.313221
ENSGALG00000003716	1.92276	1.11687	0.408544	0.890343	1.02601	1.10576
ENSGALG00000003717	9.57881	10.0913	11.094	10.5191	9.76226	10.1951
ENSGALG00000003720	5.18938	4.4619	4.2061	2.86477	6.36575	4.54378
ENSGALG00000003722	9.92944	10.8756	12.5901	8.637	10.5332	8.5132
ENSGALG00000003726	63.0368	42.4302	35.0998	27.7872	61.1626	50.2006
ENSGALG00000003727	6.05807	7.91352	13.3084	5.9568	7.31918	6.29387
ENSGALG00000003731	12.4522	13.713	12.5719	10.4686	14.7358	11.9179
ENSGALG00000003732	11.6088	17.0339	11.8753	17.0675	21.1027	17.4412
ENSGALG00000003733	4.16843	6.38588	5.21659	4.19517	1.52157	5.3414
ENSGALG00000003734	20.9637	18.371	22.4236	21.8636	21.5614	16.2388
ENSGALG00000003736	1.70132	1.94163	3.10868	1.33456	1.77623	1.6867
ENSGALG00000003738	33.196	40.5672	46.1535	37.1246	32.7857	37.7385
ENSGALG00000003741	24.1055	15.1835	18.493	18.6946	25.2422	19.9951
ENSGALG00000003742	4.31258	3.5323	6.1998	3.95737	3.67725	4.4869
ENSGALG00000003743	11.5409	9.55737	11.1092	9.37975	8.85591	9.97883
ENSGALG00000003744	0.479565	0.175462	2.55382	0.331726	0.474884	0.442677
ENSGALG00000003745	20.4019	22.6638	27.8131	25.003	21.8325	20.9196
ENSGALG00000003747	27.1261	21.7837	21.9679	15.4202	29.7781	29.1265
ENSGALG00000003748	20.5381	17.6639	17.8601	15.3485	19.2517	20.3461
ENSGALG00000003750	22.3147	29.0433	17.7204	28.3416	19.6145	20.4239
ENSGALG00000003753	2.52517	2.21973	4.6045	2.68245	2.7435	3.04724
ENSGALG00000003757	15.3757	10.2944	17.9975	12.6774	12.3321	11.0814
ENSGALG00000003758	1.91076	2.14394	2.18741	2.51326	2.13931	2.49359
ENSGALG00000003759	0.67722	0.651027	1.53557	0.411168	0.568875	0.402352
ENSGALG00000003766	5.68695	5.6071	5.97142	6.26541	5.40463	5.90856
ENSGALG00000003767	2.88201	2.28886	2.47576	2.94174	2.05016	2.73625
ENSGALG00000003770	243.17	406.604	313.066	253.837	228.869	295.591
ENSGALG00000003771	7.97857	6.40417	7.74386	7.19457	8.24276	7.75529
ENSGALG00000003774	10.7943	6.12219	7.55516	8.57781	11.7447	9.32331
ENSGALG00000003775	4.36397	3.27937	3.46056	5.63213	2.31231	4.61308
ENSGALG00000003777	0.225719	0.128513	1.34761	0.170259	0.109239	0.240442
ENSGALG00000003778	11.6911	12.6958	14.4796	11.4158	11.9902	12.7709
ENSGALG00000003781	18.6189	16.7847	26.6009	20.4522	16.9497	17.516
ENSGALG00000003786	16.8101	17.6477	16.5623	18.8272	18.22	18.7797
ENSGALG00000003788	15.5219	16.366	24.0513	13.5207	16.8652	17.5021
ENSGALG00000003789	1.10829	1.38112	0.819516	2.39143	1.13829	0.756137
ENSGALG00000003792	4.36105	6.48898	4.5014	4.38341	3.85923	4.05262
ENSGALG00000003793	37.9237	51.8897	50.2445	52.416	46.3505	48.941
ENSGALG00000003794	20.8558	19.5364	18.9448	16.7648	21.4776	19.8813
ENSGALG00000003795	23.7172	29.008	26.9383	32.9639	27.2789	30.3453
ENSGALG00000003798	32.2639	36.7033	48.4826	29.6527	37.3287	34.7376
ENSGALG00000003799	13.8922	15.858	15.8265	13.6249	14.9748	16.3079
ENSGALG00000003800	8.01707	9.2995	12.4168	9.96089	9.27261	8.8142
ENSGALG00000003802	0.750722	0.687757	1.55047	0.96945	0.869534	0.754323
ENSGALG00000003803	42.1292	66.6329	105.921	39.8968	43.9829	50.293
ENSGALG00000003805	28.4006	20.0292	24.3348	13.3407	27.3506	29.2585
ENSGALG00000003806	435.934	436.414	417.628	361.614	462.96	468.031
ENSGALG00000003807	14.4859	16.8084	15.3282	14.1184	14.3613	17.1058
ENSGALG00000003812	25.0362	26.2567	25.7075	19.0894	26.532	17.1619
ENSGALG00000003814	0.493306	0.211381	0.530562	0.112647	0.135658	0.34401
ENSGALG00000003815	169.216	207.401	157.041	167.701	175.845	163.06
ENSGALG00000003816	1.97627	0.973177	2.1306	0.951787	2.09105	2.20409
ENSGALG00000003818	0.424523	0.445455	0.495503	0.62549	0.590703	0.955843
ENSGALG00000003819	4.80481	10.5614	6.06704	3.99994	3.00228	1.53747
ENSGALG00000003820	110.654	134.431	110.955	127.016	107.945	135.986
ENSGALG00000003821	9.05156	8.85247	5.11687	4.33728	6.52444	9.99105
ENSGALG00000003824	15.9087	17.4084	20.713	14.922	16.7936	15.4798
ENSGALG00000003826	8.39496	10.0376	8.49009	7.96252	9.29433	9.32701
ENSGALG00000003829	0.138234	0.174751	0.297584	0.473957	0.179891	0.0337825
ENSGALG00000003832	20.3335	20.8463	23.3709	24.6707	17.841	20.947
ENSGALG00000003833	0.129614	0.0858201	0.131034	0.0802471	0.173819	0.184363
ENSGALG00000003836	0.163071	0.0926321	0.634663	0	0.104571	0.224451
ENSGALG00000003837	0.483822	0.514362	0.523825	0.512126	0.362063	0.322712
ENSGALG00000003838	0	0.0811717	0.109695	0.282999	0.193919	0.120055
ENSGALG00000003841	0.170672	0.0366209	0.119079	0.0564143	0.15742	0.0863489
ENSGALG00000003845	19.0305	22.0281	27.077	24.8237	18.6168	20.2364
ENSGALG00000003849	0.159662	0.0303109	0.193227	0.146029	0.0211246	0.0140258
ENSGALG00000003851	6.82997	8.7904	11.8026	12.8326	7.71312	7.77659
ENSGALG00000003854	4.53518	3.47489	5.73237	4.38489	4.78401	4.05299
ENSGALG00000003855	22.4859	32.3529	21.4005	29.789	22.3266	24.7609
ENSGALG00000003857	0	0	0	1.02387	0.526038	0
ENSGALG00000003859	5.84052	3.62473	6.00613	5.25802	6.1443	5.25018
ENSGALG00000003860	3.22309	2.35769	2.40933	2.30653	3.43369	2.72407
ENSGALG00000003861	11.2865	10.507	12.9956	10.2567	12.2632	11.9439
ENSGALG00000003862	5.34549	7.17031	8.59446	5.55942	5.31889	7.32387
ENSGALG00000003863	0.832847	1.01311	1.04775	0.656965	1.88933	0.859906
ENSGALG00000003866	0.132869	0.160354	0.247083	0.0322277	0.352473	0.0956783
ENSGALG00000003870	7.01788	8.60138	17.4763	9.75043	8.43916	8.10163
ENSGALG00000003875	32.8632	30.623	26.1551	23.2158	28.602	29.3003
ENSGALG00000003876	1.79404	1.49394	4.53558	3.74823	1.95239	1.77855
ENSGALG00000003878	69.5351	87.4359	70.4442	80.2071	79.0646	78.7176
ENSGALG00000003879	10.8849	10.4705	14.1236	7.54405	11.0918	10.6757
ENSGALG00000003880	11.5079	11.767	13.2435	11.6477	12.4872	11.6708
ENSGALG00000003881	4.40866	5.06292	3.63397	1.78984	6.00645	4.61457
ENSGALG00000003882	56.9096	76.5482	76.672	46.5955	66.6078	79.8662
ENSGALG00000003883	11.9727	9.31927	10.5542	11.1241	10.9735	11.554
ENSGALG00000003885	1.8621	0.877576	1.44425	1.0369	2.17077	2.02894
ENSGALG00000003886	16.765	17.6228	16.7775	12.5997	14.3221	21.6597
ENSGALG00000003891	12.6903	10.7142	8.94641	9.97451	11.6962	11.8539
ENSGALG00000003893	32.0024	31.6101	24.6643	29.9253	30.6867	24.911
ENSGALG00000003895	0	0	0.817808	0.0986395	0	0.292495
ENSGALG00000003899	0.177138	0.0472452	0.0642476	0.306069	0.0374544	0
ENSGALG00000003901	6.87822	7.90308	8.97545	8.39222	5.81586	6.15182
ENSGALG00000003904	0.14665	0.294705	1.23424	0.190246	0.30555	0.122885
ENSGALG00000003906	7.28064	6.63817	8.43496	5.72499	7.0079	7.17696
ENSGALG00000003907	11.9613	15.349	24.0374	13.8713	11.7674	13.7688
ENSGALG00000003908	0.0491324	0.0651772	0.639193	0.0805199	0.0629848	0.0617389
ENSGALG00000003909	21.7097	19.9042	18.3407	18.0596	21.0334	19.7614
ENSGALG00000003911	0.163982	0.0955102	0.434095	0	0.0470643	0.0686653
ENSGALG00000003913	1.64283	3.21887	3.85104	3.6921	2.85332	3.47784
ENSGALG00000003914	0.519232	1.53417	2.77644	1.21135	0.775668	0.900004
ENSGALG00000003916	14.4891	17.2541	18.886	18.7013	13.9855	13.8246
ENSGALG00000003919	15.2093	17.9628	19.3281	16.7048	17.487	19.0096
ENSGALG00000003920	5.76429	3.87355	5.01769	4.40002	5.30202	4.84415
ENSGALG00000003921	20.6728	34.5924	24.0801	25.9702	24.9714	31.7321
ENSGALG00000003922	39.802	37.4991	23.8114	16.9316	41.7389	33.7229
ENSGALG00000003923	71.9039	32.9188	59.5091	17.6848	58.6391	58.8515
ENSGALG00000003924	18.9958	19.786	22.3209	20.9094	20.2009	16.2518
ENSGALG00000003925	0.0262676	0.0241959	0.262891	0	0.0224227	0.112562
ENSGALG00000003928	0	0.0814675	1.10124	0	0.0436015	0.281467
ENSGALG00000003929	19.1608	19.3054	21.8758	21.9003	19.1811	18.3885
ENSGALG00000003930	3.05757	2.72969	4.08424	2.58447	4.25102	3.28249
ENSGALG00000003932	36.4103	47.9846	54.0798	36.178	47.1185	33.4935
ENSGALG00000003933	32.5718	39.4249	27.2857	36.8908	27.0391	32.9694
ENSGALG00000003935	2.9064	3.09702	2.30837	2.02911	2.32046	3.91994
ENSGALG00000003936	56.2329	87.6225	57.0524	84.969	51.0991	54.4158
ENSGALG00000003937	11.5706	10.5744	11.4877	7.07503	12.6431	11.1254
ENSGALG00000003939	44.4994	44.4613	28.2242	39.4744	41.5494	37.4593
ENSGALG00000003941	22.2918	21.7692	21.2873	18.8819	22.8069	19.7806
ENSGALG00000003942	11.7773	13.5339	16.0235	14.5473	11.7681	13.0474
ENSGALG00000003944	1.62993	1.36164	2.43143	1.30026	1.61978	1.70168
ENSGALG00000003947	108.255	109.447	100.249	89.2005	128.504	114.959
ENSGALG00000003948	143.459	106.751	105.107	104.24	113.285	115.138
ENSGALG00000003950	16.1077	17.4925	19.4372	15.5567	17.4618	16.3256
ENSGALG00000003952	0.349676	0.22346	0.722196	0.560935	0.410695	0.689613
ENSGALG00000003955	2.18674	2.32046	2.75482	1.83813	1.17191	1.89201
ENSGALG00000003958	8.90861	8.52468	8.90995	6.80392	10.3676	9.62764
ENSGALG00000003959	17.8102	20.6882	28.2339	13.4592	16.576	19.9711
ENSGALG00000003966	713.488	991.066	950.693	898.36	822.105	916.968
ENSGALG00000003969	44.0372	53.4163	38.2075	37.0569	43.9113	41.061
ENSGALG00000003972	1.8381	1.30475	0.961906	2.57105	1.31851	1.94878
ENSGALG00000003973	16.5521	22.711	18.6178	24.7225	13.6187	18.7995
ENSGALG00000003976	2.50806	1.91151	3.59549	2.19317	2.3471	1.99497
ENSGALG00000003977	29.1123	35.508	27.7824	27.8398	32.8863	30.1647
ENSGALG00000003978	0	0	0.619187	0.434995	0	0
ENSGALG00000003979	3.35354	3.76936	5.10455	3.33813	3.06034	3.94357
ENSGALG00000003985	8.90712	6.97948	9.68856	7.91481	9.99999	9.86333
ENSGALG00000003986	13.5454	17.5678	16.0747	18.5375	12.7157	16.0265
ENSGALG00000003987	4.02095	4.87498	7.69132	10.5045	5.21939	6.65482
ENSGALG00000003990	3.70435	3.20952	4.03874	4.46092	2.68402	3.84975
ENSGALG00000003991	15.6091	20.4109	16.9847	18.1919	20.136	16.4857
ENSGALG00000003995	8.36144	9.12269	11.2114	8.82478	7.72832	8.80805
ENSGALG00000003999	6.8554	4.91491	5.13661	6.53482	5.33532	6.02492
ENSGALG00000004002	48.0799	49.7812	58.5104	37.9436	46.7442	46.987
ENSGALG00000004003	28.5321	36.6996	22.9905	28.7017	27.7969	30.1861
ENSGALG00000004004	8.77183	8.88776	11.5726	8.51365	8.6948	9.21686
ENSGALG00000004005	38.8285	52.7005	38.1515	51.9701	33.3373	40.2644
ENSGALG00000004009	2.27956	2.33046	2.12139	1.53252	3.22655	1.25478
ENSGALG00000004017	12.6516	16.064	7.8489	9.87392	12.5968	10.4102
ENSGALG00000004019	6.19866	6.84977	7.72488	5.30877	5.99849	6.59119
ENSGALG00000004028	0.267442	0.140866	0.348247	0.33008	0.380286	0.0818362
ENSGALG00000004033	6.15224	8.36477	5.81347	5.30421	4.798	6.81021
ENSGALG00000004034	80.7645	79.2761	69.0602	60.75	80.427	77.0804
ENSGALG00000004035	0.781458	0.652157	0.618927	1.18869	0.535879	0.567185
ENSGALG00000004037	4.94355	4.84069	6.42705	3.45123	5.85788	4.89349
ENSGALG00000004038	5.71305	5.28755	5.82969	6.85916	4.24531	4.26535
ENSGALG00000004039	39.0961	43.8733	60.941	53.1215	49.7097	57.1561
ENSGALG00000004040	27.7291	27.0173	26.4843	28.1705	25.7492	28.2842
ENSGALG00000004042	11.7577	10.5586	11.3157	7.98809	13.1012	10.0528
ENSGALG00000004045	9.96569	10.3415	9.73931	7.32264	8.36834	7.62347
ENSGALG00000004046	7.86353	5.16319	7.82836	5.37911	8.60054	7.37511
ENSGALG00000004047	31.8308	28.3638	26.1815	24.7662	28.6636	29.4926
ENSGALG00000004048	24.36	12.0753	18.7197	14.0584	24.7332	19.6617
ENSGALG00000004049	11.7355	14.957	15.3205	9.95632	12.9989	12.037
ENSGALG00000004052	13.6782	14.3232	14.477	12.5927	14.0983	13.4227
ENSGALG00000004055	13.2555	14.2751	19.9571	10.7104	17.1019	15.6542
ENSGALG00000004057	15.8958	20.0736	16.9089	22.2922	15.6659	17.0967
ENSGALG00000004058	0.816741	1.17026	1.26372	2.17934	0.745249	0.602072
ENSGALG00000004059	1.79533	0.898182	3.88585	0.948098	1.18049	1.67095
ENSGALG00000004063	8.81573	11.1948	15.2914	10.575	10.9127	11.0875
ENSGALG00000004064	0.0300904	0.0826585	0.902762	0.0373866	0.153427	0.115556
ENSGALG00000004065	17.5312	15.5957	13.389	12.033	16.4083	18.8235
ENSGALG00000004066	0.529441	0.776211	0.909602	0.717754	0.621102	1.09725
ENSGALG00000004068	6.90098	6.84096	8.37204	7.86293	7.13792	7.5557
ENSGALG00000004069	0.190263	0.0808667	0	0.152437	0.163193	0.31097
ENSGALG00000004070	12.5476	12.8565	16.9925	8.19131	15.3305	13.0497
ENSGALG00000004071	0.366938	0.692841	0.258593	0.316513	0.324042	0.308052
ENSGALG00000004074	0.135344	0.0417845	0	0.1239	0.134177	0
ENSGALG00000004078	0.173151	0.241927	3.79934	0.353839	0.101125	0.444217
ENSGALG00000004079	12.9607	12.3376	13.1726	10.8875	14.9041	12.5473
ENSGALG00000004081	1.39903	2.06672	1.69095	1.73034	0.954841	1.501
ENSGALG00000004082	15.765	14.7293	15.1108	13.1716	15.9978	14.0931
ENSGALG00000004085	6.86473	9.41608	10.0367	8.36768	7.28226	7.60203
ENSGALG00000004087	6.66772	8.1527	8.97826	5.37926	3.65548	7.4527
ENSGALG00000004088	11.6616	11.7677	12.7657	9.26745	12.2717	10.8926
ENSGALG00000004096	16.5845	30.9627	19.1543	34.3368	18.0144	22.4265
ENSGALG00000004097	1.85994	1.93746	2.09571	2.45438	2.05164	2.35413
ENSGALG00000004098	15.4199	18.4218	22.848	14.0184	18.074	17.1684
ENSGALG00000004104	8.12343	8.81924	8.76574	7.49091	9.75205	8.43476
ENSGALG00000004106	34.5525	54.9284	39.4311	27.5466	39.7059	51.0975
ENSGALG00000004107	304.21	427.544	378.467	458.364	312.751	359.156
ENSGALG00000004108	55.5388	52.1908	49.0935	37.4786	53.4173	42.5025
ENSGALG00000004110	8.66915	12.6466	14.3192	9.3175	10.0646	11.4455
ENSGALG00000004111	0.169984	0.145295	0.107015	0.413824	0.157567	0.184594
ENSGALG00000004112	13.9402	18.0504	12.4276	17.4683	9.25364	12.3861
ENSGALG00000004113	5.02083	3.7411	3.75717	3.11053	3.43502	4.64987
ENSGALG00000004115	63.8784	79.2907	70.0631	58.6863	68.7942	65.855
ENSGALG00000004116	0.464232	0.210076	0.421804	0.253542	0.160504	0.305219
ENSGALG00000004121	22.7938	24.8897	25.6755	18.79	22.7336	20.7241
ENSGALG00000004122	62.6624	72.3177	71.1668	55.1977	70.4461	67.6404
ENSGALG00000004123	1.77784	1.98536	9.06238	1.38689	2.08073	2.42609
ENSGALG00000004127	1.76898	1.73217	2.40795	1.28671	1.22428	1.7031
ENSGALG00000004128	4.23833	1.68394	2.39878	3.0254	2.41277	3.34307
ENSGALG00000004129	0.571289	0.525113	0.609741	0.589591	0.421038	0.658108
ENSGALG00000004133	26.5559	26.6718	25.771	21.1454	26.8392	23.8114
ENSGALG00000004140	48.8041	47.7176	44.2398	41.4361	53.0901	50.1351
ENSGALG00000004141	0	0.467412	0	0	0	0.4097
ENSGALG00000004143	137.962	165.742	168.746	129.663	156.19	154.794
ENSGALG00000004144	17.497	15.8099	12.1815	10.6769	20.8925	17.0764
ENSGALG00000004146	0.0330027	0.241658	0.117187	0.039971	0.175169	0.441055
ENSGALG00000004150	4.40897	2.75627	2.66657	2.66903	4.62048	2.91491
ENSGALG00000004152	12.6983	16.0689	17.7299	16.0545	12.7944	15.3393
ENSGALG00000004153	3.32873	3.09272	4.17032	3.37971	5.25979	3.65702
ENSGALG00000004156	12.2489	13.0409	17.3619	15.3556	14.3975	12.0442
ENSGALG00000004160	68.3728	68.4124	66.2859	47.758	80.6272	66.9635
ENSGALG00000004161	83.1493	132.148	320.618	94.7063	115.513	115.073
ENSGALG00000004162	1.6479	1.80733	3.70139	1.1707	1.55911	1.45333
ENSGALG00000004165	30.0698	32.0802	30.0984	27.155	30.5904	27.0436
ENSGALG00000004166	12.3923	12.2835	14.8348	11.5567	11.8811	13.9576
ENSGALG00000004167	4.52634	12.3738	6.26801	19.6625	9.31282	5.5963
ENSGALG00000004168	17.9191	18.4988	17.8946	16.7452	18.9692	16.8148
ENSGALG00000004169	40.6592	44.0801	30.9895	27.2784	39.1413	37.8792
ENSGALG00000004170	19.6991	34.1895	32.2724	24.2938	21.8386	24.7641
ENSGALG00000004171	6.97583	6.45879	8.22909	7.51309	6.91434	7.81652
ENSGALG00000004172	11.7576	13.3671	16.0727	13.7634	14.5071	12.9153
ENSGALG00000004173	0.109436	0.0754077	0.0715972	0.108864	0.0835644	0.0278914
ENSGALG00000004174	32.2598	35.8465	43.705	29.5304	29.4391	32.0619
ENSGALG00000004176	72.1008	103.88	88.1992	124.16	70.3175	91.4108
ENSGALG00000004179	7.94518	7.70055	9.25985	5.02149	7.59853	7.36064
ENSGALG00000004180	32.9207	50.2935	44.4312	30.666	31.428	33.2956
ENSGALG00000004184	2995.6	3412.56	2495	2989.02	2966.01	2689.49
ENSGALG00000004186	7.60938	8.29953	5.57857	6.40354	6.22072	5.83958
ENSGALG00000004189	14.731	14.5877	12.9166	11.2124	19.9435	15.425
ENSGALG00000004190	12.9492	15.0452	15.7899	15.9557	14.0966	13.5151
ENSGALG00000004191	6.77785	7.27741	10.7861	8.08871	7.74247	6.47503
ENSGALG00000004192	10.2892	10.0434	10.3196	11.9429	11.8983	9.88287
ENSGALG00000004193	2.54331	1.57425	2.95388	2.17162	2.15345	2.2006
ENSGALG00000004195	16.252	17.6022	14.5388	7.70567	20.4012	14.692
ENSGALG00000004196	0.181927	0.431535	0.155349	0.112726	0.15476	0.192277
ENSGALG00000004197	10.1585	10.3073	12.5987	9.78591	11.7533	13.013
ENSGALG00000004198	34.9811	39.411	40.9641	36.3786	40.823	39.2844
ENSGALG00000004199	2.17384	3.65302	11.6187	2.56231	3.42245	3.26015
ENSGALG00000004200	15.9821	20.3929	22.4572	13.7063	15.6945	17.0549
ENSGALG00000004203	14.4695	18.4369	19.9699	15.8918	21.7273	18.645
ENSGALG00000004204	15.2592	16.7227	15.8793	13.8471	15.4456	16.8652
ENSGALG00000004205	84.2614	73.0502	69.73	76.1869	71.228	81.7781
ENSGALG00000004209	0.188041	0.0354698	0.151128	0.138389	0.193812	0.203421
ENSGALG00000004212	34.5709	41.2659	34.9104	34.5619	35.299	40.4233
ENSGALG00000004215	22.5181	20.6517	19.9052	18.6599	24.5726	23.0473
ENSGALG00000004216	13.0613	10.4804	19.1425	9.11248	11.0177	15.0919
ENSGALG00000004220	173.497	227.414	190.25	186.581	166.213	167.404
ENSGALG00000004221	1.3522	2.37608	1.96178	1.37894	1.89026	1.70459
ENSGALG00000004222	32.8208	37.3187	34.7479	26.681	32.6342	29.3042
ENSGALG00000004224	6.49166	8.46628	10.4547	7.81748	7.03632	7.30926
ENSGALG00000004225	14.0249	16.1235	16.794	13.349	12.8959	13.4501
ENSGALG00000004227	7.65799	8.10021	6.53941	7.05122	8.29581	8.52334
ENSGALG00000004228	4.29524	5.95653	7.31937	4.29234	3.65686	4.41507
ENSGALG00000004230	0.167006	0.49979	0.396964	0.353238	0.105984	0.283207
ENSGALG00000004231	3.74028	2.76215	3.83422	2.1892	4.10216	2.78516
ENSGALG00000004234	2.84523	2.09226	2.25076	2.4796	3.39591	2.80909
ENSGALG00000004236	3.39337	4.23454	5.32877	4.54827	4.33749	4.40127
ENSGALG00000004237	90.1242	92.155	80.6044	72.1641	93.9351	84.4776
ENSGALG00000004238	6.34707	9.258	10.6291	9.94876	7.96514	8.53772
ENSGALG00000004239	2.49506	1.98573	1.47293	1.54258	1.75315	2.55754
ENSGALG00000004240	6.23493	6.66223	7.72281	7.67505	5.99177	6.85413
ENSGALG00000004243	2.2315	1.81552	27.1591	2.27851	0.866382	3.37875
ENSGALG00000004244	5.24731	3.65915	5.5097	5.2533	5.24051	4.35961
ENSGALG00000004245	18.4294	36.5043	18.621	33.5607	24.1641	28.463
ENSGALG00000004246	0.858083	0.948647	0.838287	0.45359	0.875601	0.584127
ENSGALG00000004247	0.186184	0.107632	0.25552	0.252116	0.265084	0.179253
ENSGALG00000004249	0.568866	0.697793	0.748159	0.92822	0.631252	0.703929
ENSGALG00000004250	9.59451	12.3022	10.0624	8.86943	9.53042	8.87104
ENSGALG00000004252	1.03629	1.21352	0.865757	0.713289	1.05302	0.970931
ENSGALG00000004254	3.19127	3.03163	5.22412	3.19485	3.94391	3.84949
ENSGALG00000004255	8.15923	7.62183	15.1946	7.43409	7.68982	8.85205
ENSGALG00000004257	1.64837	1.76149	1.46662	1.01308	2.34978	1.82384
ENSGALG00000004259	37.227	41.6883	45.6915	30.7926	37.5452	38.5728
ENSGALG00000004260	0.0882553	0.0930175	0.0535426	0.0553394	0.0194686	0.109253
ENSGALG00000004261	0.151375	0.234217	0.0450118	0.0427404	0.0611346	0.141523
ENSGALG00000004263	58.2644	71.272	60.3771	71.3833	64.9077	67.39
ENSGALG00000004266	10.6136	15.7222	12.1678	13.251	13.5735	11.753
ENSGALG00000004267	0.103389	0.160728	0.203175	0.206967	0.188684	0.102694
ENSGALG00000004268	15.3889	15.1264	20.9953	13.1693	18.8669	18.9665
ENSGALG00000004270	5.01661	9.47937	12.3514	5.53625	3.29549	7.15992
ENSGALG00000004272	7.74335	9.25052	9.2857	8.2264	7.81797	9.32227
ENSGALG00000004273	14.029	15.7891	31.8545	14.7566	14.0985	18.7467
ENSGALG00000004274	3.00063	2.06774	2.87586	1.58966	2.26671	2.3235
ENSGALG00000004276	17.1665	18.2241	11.8033	19.6947	16.3869	14.1565
ENSGALG00000004280	0.133031	0.0582761	0	0.136941	0.0568451	0.0552153
ENSGALG00000004282	16.2188	15.2691	16.2517	15.4037	17.6363	15.1391
ENSGALG00000004286	1.19653	0.575738	0.824627	0.951864	0.85395	0.729169
ENSGALG00000004288	5.34265	4.63884	4.09114	5.02808	4.95656	4.61027
ENSGALG00000004290	0.633818	0.692443	0.936803	2.204	0.686371	0.523434
ENSGALG00000004294	9.55555	8.96175	9.24467	7.17267	6.63452	9.8608
ENSGALG00000004295	24.1966	31.7922	25.2741	26.2656	23.7294	25.8886
ENSGALG00000004297	0.0295474	0.0562716	0.810152	0.0136743	0.0898976	0.0900956
ENSGALG00000004300	13.3338	12.4802	15.8957	10.6939	11.1883	12.9327
ENSGALG00000004302	36.3089	45.4716	39.3014	33.9073	34.8454	37.8238
ENSGALG00000004304	102.636	88.468	92.2955	83.5493	114.36	95.2609
ENSGALG00000004306	1.93435	2.80209	3.19475	1.79617	2.22523	3.0467
ENSGALG00000004309	1.0305	0.963657	1.79618	1.49022	1.36617	1.29079
ENSGALG00000004310	27.7125	30.1545	20.4874	27.5218	21.9585	27.5777
ENSGALG00000004311	6.95926	8.47811	9.20693	8.11679	5.94579	5.8632
ENSGALG00000004319	1.94747	1.44012	1.46603	1.23183	1.41057	1.79913
ENSGALG00000004320	0.0810114	0.0531689	0.129701	0.0503738	0.204112	0.0844718
ENSGALG00000004321	13.692	14.4461	21.5789	15.9116	13.942	13.0275
ENSGALG00000004323	3.58821	3.67706	4.4369	4.16913	4.78257	4.91158
ENSGALG00000004324	2.48005	2.38312	2.47621	3.10863	2.29311	2.2206
ENSGALG00000004325	58.2365	53.9106	49.8466	50.4781	59.3958	50.7494
ENSGALG00000004326	15.6885	15.7903	21.0688	21.1125	16.9754	16.9717
ENSGALG00000004328	3.18623	3.53684	4.64992	4.45814	3.71558	3.402
ENSGALG00000004329	4.808	5.9946	6.64951	5.77978	5.28597	7.26258
ENSGALG00000004332	0.119127	0.275197	0.242951	0.0368812	0.019197	0.0937316
ENSGALG00000004333	10.7727	8.40602	9.22929	9.49798	7.03381	8.21961
ENSGALG00000004334	3.1487	2.35996	1.83826	2.43048	3.36108	3.61865
ENSGALG00000004336	0.12398	0.145959	0.0230729	0.0834411	0.176323	0.0589645
ENSGALG00000004341	3.01477	3.66564	4.1948	4.87082	3.44768	3.08757
ENSGALG00000004342	14.8272	18.1882	16.8302	12.2486	14.6141	12.0788
ENSGALG00000004343	1.11196	1.59337	0.825337	1.57418	0.653994	1.66447
ENSGALG00000004345	2.09689	1.39779	2.86846	1.61924	1.92219	2.66478
ENSGALG00000004346	0.463995	0.641133	0.0593833	0.896356	0.153495	0.407408
ENSGALG00000004347	6.63098	6.68261	7.37805	7.39667	8.44992	8.01126
ENSGALG00000004348	3.15294	2.43148	3.55935	3.63781	2.58579	3.55244
ENSGALG00000004350	1.7618	2.17567	4.9312	2.11401	1.48299	1.87019
ENSGALG00000004352	27.9151	31.4394	41.6499	35.9216	30.8226	31.975
ENSGALG00000004353	26.4736	31.4564	26.3561	22.7748	24.8699	23.1596
ENSGALG00000004355	14.4672	17.721	17.2308	10.1562	16.7821	19.7774
ENSGALG00000004357	138.82	150.092	126.76	108.029	140.461	129.773
ENSGALG00000004362	9.71444	13.5356	17.2041	12.9362	11.0902	12.8928
ENSGALG00000004363	16.4885	15.9983	16.2586	17.6211	17.6769	16.3009
ENSGALG00000004364	8.06798	7.09325	8.25488	5.26043	7.96197	6.31475
ENSGALG00000004366	17.4042	17.0181	15.7513	18.2812	17.052	15.8462
ENSGALG00000004367	0.318651	0.143787	0.134096	0.465598	0.370942	0.274385
ENSGALG00000004369	3.59762	3.14987	9.39698	3.04948	3.54673	4.18439
ENSGALG00000004370	4.79921	6.19813	5.86752	4.9982	4.40973	4.39534
ENSGALG00000004372	14.1064	15.0102	15.8789	12.8823	16.5425	16.5217
ENSGALG00000004373	0.0307758	0.0561754	0.0264066	0.0901604	0.130745	0.155976
ENSGALG00000004375	37.5485	46.2323	51.9715	32.6753	41.8482	40.291
ENSGALG00000004376	2.34125	1.99765	2.67297	2.2009	2.30424	3.19228
ENSGALG00000004378	5.70363	4.97995	5.71393	5.8929	6.50074	5.38082
ENSGALG00000004379	0	0	0	0	0	1.03771
ENSGALG00000004383	15.7773	21.0706	23.1907	17.1363	17.22	14.9598
ENSGALG00000004386	0.340586	0.585754	3.56044	0.773734	0.890881	0.603773
ENSGALG00000004387	17.9268	21.7421	18.0479	20.1252	15.768	20.3137
ENSGALG00000004390	11.7663	13.938	15.7714	13.9836	12.3876	14.0339
ENSGALG00000004394	1.41496	1.14265	1.77068	1.64064	0.804672	1.09111
ENSGALG00000004397	5.85754	8.1453	7.14246	5.8128	5.13272	5.86094
ENSGALG00000004398	0.728894	0.75306	1.09878	2.84391	0.951692	0.972126
ENSGALG00000004400	3.9072	5.00635	9.00851	6.16981	2.66661	3.74027
ENSGALG00000004401	0	0.137443	2.99066	0.285937	0	0.49571
[truncated: 14,159 more rows]
