# Supplementary material for: Morphological Characteristics and Transcriptome Landscapes of Chicken Follicles during Selective Development
Source: Animals (Basel). 2022 Mar 11;12(6):713. doi: 10.3390/ani12060713 (PMC8944860; doi:10.3390/ani12060713)
Supplement: Supplementary file 1 [file animals-12-00713-s001.zip › Supplementary materials/Supplemental Table S5.xlsx]

## Sheet: A-DEGs in LWF versus SYF group
ENSEMBL	SYMBOL	log2FoldChange	lfcSE	stat	pvalue	padj	LWF-1	LWF-2	LWF-3	LWF-4	LWF-5	LWF-6	SYF-1	SYF-2	SYF-3	SYF-4	SYF-5	SYF-6
ENSGALG00000000364	STC1	1.06457	0.3096	3.43855	0.000584848	0.0469288	3.76545	3.46848	1.6347	2.25682	1.85988	1.70389	3.64128	5.46029	4.75861	4.09509	11.2557	3.20091
ENSGALG00000000585	MYL4	1.24453	0.328626	3.78708	0.000152428	0.0221898	3.99469	4.49279	3.51461	2.49211	3.30637	4.28969	11.6902	10.7164	7.57646	11.5014	2.96498	5.80349
ENSGALG00000001449	STRA6	3.51024	0.681999	5.14699	2.64699e-07	0.000622042	1.57716	0.268007	0.0991782	1.35816	0.620174	0.36978	18.7741	7.9141	6.79642	8.61717	4.12888	0.890284
ENSGALG00000002182	NR5A2	1.65243	0.420465	3.93002	8.4939e-05	0.0159871	3.42645	4.09056	2.84048	2.33411	3.58104	1.40759	18.7329	12.821	9.62556	5.54289	4.68362	3.40416
ENSGALG00000002766	MLKL	2.90594	0.72679	3.99832	6.37926e-05	0.0135724	0.0230355	0.0893639	0.0241432	0.0400696	0.0705969	0.0905257	0.830523	0.294191	0.176641	0.0959031	0.139905	0.0713867
ENSGALG00000003750	PLCG1	1.1681	0.311957	3.74442	0.000180809	0.025206	4.23076	5.15298	6.31093	5.26356	5.10279	5.99492	17.9838	16.3241	8.14537	12.38	6.63579	5.43881
ENSGALG00000004974	PPARG	1.32391	0.349118	3.79216	0.000149344	0.0219756	22.0977	18.1929	14.2246	14.5084	17.0744	15.0449	69.2459	58.1351	28.3043	46.4596	21.8961	18.4329
ENSGALG00000005845	SLC7A5	1.1628	0.312447	3.7216	0.000197966	0.0256421	20.6417	21.099	19.7728	27.6284	20.1425	17.2406	56.6344	64.3481	37.9429	68.7916	30.9286	19.9789
ENSGALG00000005985	-	1.48387	0.366311	4.05085	5.1032e-05	0.0116813	1.05642	0.547322	0.831785	0.53018	0.804161	1.05005	1.39822	3.41614	1.916	2.51187	0.428421	1.39471
ENSGALG00000006598	SORL1	1.70696	0.415814	4.10511	4.04121e-05	0.01063	2.73938	3.06241	3.05547	4.09165	3.22607	2.28546	19.504	14.7563	6.7795	10.361	4.47895	3.02413
ENSGALG00000006662	BPIFB3	7.26765	1.44265	5.03771	4.71141e-07	0.000959133	0	0	0	0	0	0	1.10506	0.324306	0.0840879	0.0728309	0	0.0901418
ENSGALG00000007620	GFRA3	4.32268	0.987922	4.37553	1.21139e-05	0.00622732	0	0	0.0397944	0	0	0.0729188	0.797447	0.940952	0.845027	0.339362	0.1151	0
ENSGALG00000007669	EGR1	1.12242	0.312239	3.59475	0.000324701	0.0340213	10.9168	12.4071	16.9022	6.6323	14.6528	11.7818	20.7034	37.408	16.027	22.1132	43.9394	14.3657
ENSGALG00000007675	CXCR5	2.35735	0.668421	3.52674	0.000420709	0.039774	0.0217757	0.0417381	0.04607	0.0381185	0.0449186	0.0422566	0.223543	0.139915	0.103679	0.128901	0.401983	0.0452186
ENSGALG00000008263	CNTN4	1.41654	0.349728	4.05041	5.11279e-05	0.0116813	0.906564	0.762721	0.915631	1.56921	0.848719	2.5583	5.32958	2.99791	3.61471	3.5339	1.70704	2.24107
ENSGALG00000008815	LRRN4	1.79133	0.429205	4.17361	2.99813e-05	0.00930553	20.3522	20.2968	17.7825	16.7989	13.6344	12.7814	121.637	79.1155	38.585	54.7589	23.5419	16.9411
ENSGALG00000008936	ENTPD8L	1.05044	0.272552	3.85407	0.000116171	0.0187354	5.88947	5.71347	7.2928	6.88259	6.32118	8.67904	24.4405	14.2693	12.8898	13.5519	8.4346	9.22467
ENSGALG00000008945	NEXN	1.59235	0.431448	3.69071	0.000223625	0.0274525	4.13034	4.35913	2.48018	5.01946	2.93351	2.63315	17.2544	17.2932	10.4575	18.252	2.05128	4.83964
ENSGALG00000010018	CTSEAL	2.18637	0.61752	3.54056	0.000399273	0.0393296	0.15787	0	0.0412565	0.033609	0.0401615	0.037872	0.471589	0.324548	0.0378141	0.259107	0.238269	0.161864
ENSGALG00000010303	EPHX1L	1.74959	0.455179	3.84375	0.000121167	0.0190451	2.29691	2.04817	2.95361	2.76842	2.61833	10.4801	23.7756	15.6345	8.73774	16.6937	7.05708	9.39536
ENSGALG00000010326	FLVCR2	1.44606	0.385629	3.74988	0.000176923	0.0250895	2.12469	1.65937	1.83612	2.39822	1.05823	1.69771	8.51448	6.34026	3.80766	5.91135	2.34323	1.70852
ENSGALG00000010343	TSPAN16	3.61389	0.889799	4.06147	4.87655e-05	0.0115418	0.324369	0	0.339345	0.139819	0.207469	1.32153	11.0347	1.76496	2.97669	8.53547	0.534931	0.542828
ENSGALG00000010364	AADAC	1.84814	0.407215	4.53847	5.66634e-06	0.00358505	2.88514	2.79966	3.0257	4.43769	2.84038	8.03552	24.746	28.9582	8.30007	9.60159	7.05526	8.63632
ENSGALG00000010593	GALC	1.39349	0.399992	3.4838	0.000494342	0.0434862	10.2022	8.02765	7.15119	6.8757	6.58144	17.6025	48.5347	33.8761	18.3174	15.1621	10.8193	12.7111
ENSGALG00000011086	ACTA1	1.31709	0.366042	3.5982	0.000320431	0.033789	60.4145	56.7926	39.7626	29.0233	42.9969	58.8651	98.4192	251.587	74.4436	123.993	64.095	79.973
ENSGALG00000011489	TBXT	-1.36472	0.32665	-4.17793	2.9417e-05	0.00930553	1.65868	1.63041	1.20841	1.55222	1.38161	2.83434	0.488759	0.22428	1.06353	0.499021	0.75469	1.19567
ENSGALG00000011537	PDE10A	1.23837	0.334643	3.70057	0.000215118	0.0270129	0.860053	1.17418	1.21621	0.884558	0.92892	0.802932	3.78918	2.68757	1.82192	2.15471	1.9992	0.856013
ENSGALG00000011608	INF2	1.04186	0.294962	3.53218	0.000412141	0.039774	7.05421	6.99763	6.6262	5.13944	4.76486	4.58835	17.4953	16.6422	10.5159	11.1387	8.01311	6.67538
ENSGALG00000012140	FSHB	6.11199	1.58118	3.86548	0.000110873	0.018058	0	0.0170071	0	0.0144334	0	0.0159096	0.966227	0.204833	0.0341399	0.271418	0	0
ENSGALG00000012396	PTGER2	1.00206	0.277276	3.61396	0.000301551	0.032582	1.43936	1.30854	2.14876	1.36436	1.48911	2.45466	3.47912	3.28216	1.79714	2.85544	4.69304	2.6687
ENSGALG00000013409	-	2.47901	0.497768	4.98025	6.35019e-07	0.00100631	24.4224	26.4278	8.36803	16.6159	12.0115	8.87332	154.982	131.057	53.4637	89.0331	48.8628	18.9548
ENSGALG00000014267	-	1.2588	0.315652	3.98794	6.66488e-05	0.0135724	2.77486	3.18508	3.98172	3.4908	4.00046	1.93506	8.46812	9.32672	6.75029	11.2731	6.23056	3.29774
ENSGALG00000014690	SLC12A2	1.36518	0.365215	3.73804	0.000185464	0.025358	20.8892	16.3786	12.3626	11.7834	17.327	16.4772	77.4981	58.3489	32.3252	26.9825	21.6097	18.6864
ENSGALG00000014734	ZSWIM6	1.63877	0.413881	3.95952	7.51002e-05	0.0146649	1.95772	1.92613	1.82262	1.85263	1.5325	1.13677	9.48156	8.68836	3.22357	4.68838	2.46648	1.72692
ENSGALG00000014938	ABHD3	1.70565	0.438961	3.88565	0.000102057	0.0174879	2.14186	1.55155	1.03158	0.702434	2.92253	1.40437	7.06998	9.72662	4.44795	3.74944	2.65589	2.09378
ENSGALG00000015028	RLN3	2.23846	0.588177	3.80577	0.000141365	0.0215319	210.316	157.393	105.554	751.663	212.336	89.9706	1922.93	1601.07	718.799	2072.14	548.694	238.845
ENSGALG00000015205	TYRP1	4.44591	1.27432	3.48885	0.0004851	0.0429445	0.0215057	0.02081	0.0223255	0	0	0	0.410454	0.511933	0.0831071	0.259018	0.0641197	0
ENSGALG00000015340	TGS1	-1.02625	0.246995	-4.15494	3.25369e-05	0.00955068	34.7425	34.1308	32.5482	33.754	30.9584	27.3	10.4442	8.91604	26.2832	9.69243	18.6559	21.8489
ENSGALG00000016478	MATN3	1.07067	0.261384	4.09618	4.20031e-05	0.01063	11.15	12.4786	11.7945	11.3112	15.2456	11.1035	33.9436	38.5565	18.4796	23.1098	16.547	19.3141
ENSGALG00000016498	MFSD2B	2.62165	0.6575	3.9873	6.68304e-05	0.0135724	0.0770722	0.185719	0	0.127997	0.193836	0.14417	1.77617	0.386563	0.524266	0.490052	0.420394	0.117211
ENSGALG00000016511	ADGRG2	1.91659	0.554059	3.45919	0.000541801	0.0459414	2.8303	2.57877	3.29054	1.39832	1.69971	1.65342	15.8563	17.223	4.86763	6.26457	1.24891	2.41826
ENSGALG00000016563	ASB9	1.13903	0.331091	3.44022	0.000581237	0.0469288	4.63129	3.60966	4.13607	4.76875	3.60243	1.98269	10.2813	9.62209	7.70398	11.7826	6.16904	4.04917
ENSGALG00000017216	LOC428094	2.04008	0.563362	3.62126	0.000293173	0.0319822	6.4129	6.22878	2.05145	10.3939	2.37932	2.23585	32.0271	41.5371	13.9831	24.8816	5.12332	5.22908
ENSGALG00000025764	FKBP10	1.13723	0.285167	3.98794	6.66496e-05	0.0135724	56.725	56.0601	47.7217	55.9179	43.8172	26.3261	119.264	124.423	94.0822	131.706	106.834	51.4137
ENSGALG00000026790	DMRT2	2.53153	0.648692	3.90251	9.52e-05	0.0168006	0.191272	0.229368	0.180252	0.0212418	0.0506458	0.247054	1.27873	1.30656	0.732332	0.188008	0.394993	0.272679
ENSGALG00000026808	-	5.34148	0.986313	5.4156	6.10848e-08	0.00047526	0.928391	0.540982	0	0.413527	0.479408	0.236245	50.6181	44.9333	14.1556	24.6577	1.65466	0.321039
ENSGALG00000027786	SOCS3	1.16776	0.328311	3.55686	0.000375317	0.0377311	2.72913	3.86435	2.49386	1.60089	2.39071	3.28071	5.98473	5.07416	3.45037	3.18331	12.9555	5.88028
ENSGALG00000028595	CCNO	-1.07978	0.26597	-4.0598	4.91142e-05	0.0115418	54.9922	73.2307	60.6712	81.2779	87.3303	118.041	30.0432	19.43	47.3654	20.9893	61.1624	47.9066
ENSGALG00000031997	SFRP4	2.18109	0.584129	3.73392	0.000188524	0.025358	28.9577	29.9873	36.124	24.6318	19.2688	10.9633	177.597	277.51	75.1606	71.2162	27.8904	14.3933
ENSGALG00000033234	JAK3	1.38585	0.32873	4.21575	2.48947e-05	0.00819127	0.103443	0.169471	0.186111	0.134514	0.191849	0.172978	0.580242	0.585158	0.20766	0.303008	0.338444	0.26026
ENSGALG00000033683	PHOSPHO1	1.79071	0.515294	3.47513	0.000510615	0.0442085	11.4341	10.3117	9.94337	11.3828	9.71009	5.05597	61.1448	50.6949	28.3844	35.8736	7.74983	5.59612
ENSGALG00000035873	-	1.78423	0.518463	3.44138	0.000578748	0.0469288	0.12223	0.30688	0.152488	0.0213002	0.122199	0.141061	0.869058	0.939815	0.46375	0.334609	0.449973	0.051338
ENSGALG00000036346	AMH	-1.50611	0.414044	-3.63756	0.000275238	0.030919	253.02	223.241	248.283	180.187	399.795	279.684	39.2023	23.946	171.231	50.9427	167.375	118.22
ENSGALG00000036358	LMO3	-1.10821	0.324431	-3.41585	0.000635823	0.0498062	7.19768	4.7422	4.22475	5.68761	5.58124	2.83282	4.07351	1.37855	1.93854	2.26933	1.55168	3.82011
ENSGALG00000036728	PRDM16	2.59434	0.492866	5.26379	1.41112e-07	0.00047526	0.29308	0.201722	0.338781	0.411774	0.480786	0.300449	3.72828	2.94777	1.31414	2.75564	0.59712	0.46325
ENSGALG00000037603	LOC100858796	1.64575	0.396677	4.14884	3.34164e-05	0.00955068	5.65471	6.65333	6.96289	6.69627	6.5488	7.59133	37.011	31.4437	15.0505	21.4967	7.67594	6.59691
ENSGALG00000038399	PLEKHA6	1.93734	0.414343	4.67569	2.92967e-06	0.00267739	1.06157	1.51115	0.865173	1.48625	1.78163	1.49713	9.00033	8.53897	3.78805	5.42895	1.77344	2.07145
ENSGALG00000038884	SRL	2.8786	0.631997	4.55477	5.24419e-06	0.00358505	0.109513	0.10521	0.0579644	0.215643	0.147184	0.656704	2.28011	1.90411	2.37127	2.88507	0.613383	0.369312
ENSGALG00000039553	SULF1	2.3497	0.498004	4.71825	2.37887e-06	0.00235861	5.51033	3.11477	2.08521	4.86601	2.55624	2.02932	40.2108	16.7426	10.288	20.5388	5.32882	4.71484
ENSGALG00000041634	ACTG2	1.36442	0.321521	4.24365	2.19917e-05	0.00797649	131.076	175.266	177.486	116.661	133.536	278.536	350.608	702.875	287.312	512.026	172.571	441.683
ENSGALG00000041775	ESRRB	2.38057	0.530614	4.48644	7.24233e-06	0.00425487	0.703383	0.783271	0.350836	0.575873	0.455244	1.83869	6.70873	8.3023	2.20221	3.91112	1.16692	1.98953
ENSGALG00000041932	SLC5A5	3.55271	0.865472	4.10494	4.04423e-05	0.01063	1.8279	1.62047	0.150106	1.5983	0.566495	0.226458	24.2366	26.4295	7.93558	11.9785	2.5545	1.06243
ENSGALG00000042607	RSPO3	1.78112	0.358789	4.96425	6.89671e-07	0.00100631	2.44436	1.48793	5.15528	1.68755	2.42973	3.30314	11.5531	7.308	4.72702	10.766	6.54299	11.4448
ENSGALG00000043389	-	1.34336	0.352875	3.80689	0.000140725	0.0215319	0.0987817	0.189802	0.140891	0.131957	0.103393	0.150614	0.434912	0.454726	0.202361	0.44411	0.237524	0.137276
ENSGALG00000043964	SPINK4	2.13423	0.615276	3.46873	0.000522919	0.0450367	0	0.181428	0.192726	0.487249	0.189006	0	4.18459	4.08113	0.885435	1.49569	0.372363	0.376325
ENSGALG00000046159	KNG1	2.79916	0.780657	3.58564	0.000336253	0.0347885	0	0.0409795	0.0144213	0.0236864	0.0139074	0.0128317	0.389662	0.23861	0.0135852	0.397327	0.0690261	0.0286806
ENSGALG00000047495	-	3.11052	0.819784	3.79432	0.000148051	0.0219756	0.439537	0.319204	0	0.584116	0.11622	0	4.23787	1.82614	0.738834	3.27599	0	0
ENSGALG00000047771	PGF	2.1359	0.469708	4.54729	5.43406e-06	0.00358505	2.42298	2.49571	2.87151	3.39686	1.90347	3.61722	29.637	26.7629	5.95451	11.495	3.9889	3.64277
ENSGALG00000047941	-	2.63533	0.499175	5.27937	1.29628e-07	0.00047526	65.441	57.4757	20.5407	31.6556	28.7336	20.56	386.893	346.917	156.397	226.905	123.68	40.6063
ENSGALG00000051984	CDH3	-1.05354	0.284354	-3.70505	0.000211352	0.0267441	61.1454	71.07	47.3123	83.0089	62.6044	62.9546	18.9038	12.6538	40.5802	24.9613	48.6269	45.9877
ENSGALG00000053624	-	1.12878	0.272443	4.14316	3.42547e-05	0.00955068	0.277936	0.200863	0.373999	0.366489	0.147379	0.144247	0.58695	0.518222	0.402614	0.482737	0.359	0.433622
ENSGALG00000054431	-	2.59619	0.527462	4.92205	8.56438e-07	0.00100631	0.403935	0.390253	0.310225	0.338555	0.434608	0.188073	5.96998	2.76227	1.46268	2.44301	0.82256	0.817157
ENSGALG00000054770	INHA	3.35393	0.85377	3.92837	8.55237e-05	0.0159871	64.4112	21.6532	6.30909	51.7782	27.2247	12.4341	758.975	483.47	146.528	379.292	31.2739	21.327
ENSGALG00000055117	-	2.32074	0.492383	4.71329	2.43747e-06	0.00235861	7.93857	3.97642	3.54292	6.8325	3.26479	3.52912	52.0555	22.3911	12.7545	33.8006	8.57052	7.2576

## Sheet: B-DEGs in SYF versus LYF group
ENSEMBL	SYMBOL	log2FoldChange	lfcSE	stat	pvalue	padj	SYF-1	SYF-2	SYF-3	SYF-4	SYF-5	SYF-6	LYF-1	LYF-2	LYF-3	LYF-4	LYF-5	LYF-6
ENSGALG00000001115	MMEL1	-1.32783	0.350999	-3.78301	0.000154944	0.0221952	10.7189	3.57923	7.3447	9.99575	6.98867	8.60007	2.45341	1.79764	1.76329	5.9158	2.03165	3.02856
ENSGALG00000001480	FAM212B	-1.3053	0.386053	-3.38114	0.000721851	0.0497011	1.49636	1.28078	2.75344	2.02568	3.58797	7.41149	0.730561	0.703716	1.70946	1.26932	1.00846	1.37694
ENSGALG00000001559	ZP3	1.02188	0.303345	3.36871	0.000755215	0.0497011	1869.47	1426.77	963.01	853.855	1540.58	846.334	1856.48	4186.95	1477.64	2297.78	1769.99	2342.86
ENSGALG00000001696	SAG	-1.42271	0.37736	-3.77016	0.000163143	0.0222814	1.42954	1.45628	1.61519	3.33083	3.26379	2.4113	0.356406	0.32865	0.687222	0.286588	1.70604	0.718137
ENSGALG00000002182	NR5A2	2.55394	0.38146	6.69518	2.15407e-11	1.54232e-07	18.7329	12.821	9.62556	5.54289	4.68362	3.40416	48.3271	68.7395	51.9084	49.7433	35.3174	43.8456
ENSGALG00000002623	PCOLCE2	1.26853	0.341304	3.7167	0.000201843	0.0244948	2.14236	4.5095	2.49281	1.75896	2.60837	1.40722	5.65246	5.64412	4.29014	1.99236	7.37531	6.85592
ENSGALG00000002789	MAP2	1.07963	0.200303	5.38997	7.04684e-08	8.40923e-05	1.54248	1.31189	0.891665	1.94965	0.994324	1.40327	2.17209	3.77422	2.42818	3.76361	2.21477	2.82761
ENSGALG00000003750	PLCG1	1.14903	0.317184	3.62259	0.000291668	0.0294133	17.9838	16.3241	8.14537	12.38	6.63579	5.43881	22.3147	29.0433	17.7204	28.3416	19.6145	20.4239
ENSGALG00000004162	SLC16A6	-1.59548	0.449847	-3.54673	0.00039005	0.0358046	3.34054	1.46284	6.87183	3.03138	9.94257	15.4133	1.6479	1.80733	3.70139	1.1707	1.55911	1.45333
ENSGALG00000005204	GSTT1L	1.1392	0.337868	3.37174	0.000746955	0.0497011	17.1737	16.7428	8.15127	12.4182	6.05858	8.52129	26.0097	31.9323	26.2514	32.9316	10.7442	15.6877
ENSGALG00000006490	SCN3B	-2.47983	0.453455	-5.46874	4.53244e-08	7.96717e-05	2.93566	1.16426	8.28112	3.06592	3.70458	6.40466	0.276515	0.290769	1.26772	0.565578	1.24237	1.11089
ENSGALG00000008263	CNTN4	1.39012	0.303623	4.57844	4.68446e-06	0.00309526	5.32958	2.99791	3.61471	3.5339	1.70704	2.24107	8.25994	10.6676	10.5852	6.83101	3.70567	7.0892
ENSGALG00000008888	IL1RAPL2	-1.02557	0.186261	-5.50608	3.66918e-08	7.50609e-05	9.14251	3.74018	7.89176	5.73562	6.37328	6.50345	2.62719	2.82203	3.21267	3.24963	2.70913	3.10011
ENSGALG00000008914	NRAP	-1.48265	0.395171	-3.75192	0.000175485	0.0226083	0.587918	0.282872	0.258257	0.593981	0.246021	0.284707	0.158441	0.109463	0.103471	0.241844	0.0677309	0.084408
ENSGALG00000009687	KCNK2	-2.39036	0.532523	-4.48875	7.16415e-06	0.0035315	12.8146	9.51237	105.446	18.2617	109.977	59.6116	4.90446	8.66002	12.1117	15.7992	6.31328	5.8777
ENSGALG00000009844	ACTC1	2.66641	0.489156	5.45105	5.0073e-08	7.96717e-05	5.51585	8.53547	3.15818	2.62518	2.28431	2.52497	16.0196	11.0536	33.5367	5.75721	43.4476	41.3463
ENSGALG00000009845	GJD2	1.83451	0.474777	3.86394	0.000111574	0.0183648	0.838604	0.926028	0.479158	0.435121	0.198364	0.316367	1.78887	0.477505	2.83779	1.22717	1.9219	2.33305
ENSGALG00000009861	RD3	-1.19464	0.315751	-3.7835	0.000154637	0.0221952	0.123127	0.859147	0.297334	0.905947	0.93734	1.40717	0.220486	0.184166	0.434842	0.439327	0.188704	0.264229
ENSGALG00000010010	RHOQ	1.00984	0.186165	5.42443	5.81391e-08	8.32551e-05	1.96861	1.85624	2.12153	2.22336	3.24044	1.96444	3.36457	4.17911	3.80198	5.29874	3.20444	4.01184
ENSGALG00000010180	GLIS3	2.07778	0.510202	4.07246	4.6519e-05	0.0106647	0.613516	0.577717	0.219739	0.205479	0.10905	0.0933613	0.989014	1.33066	1.42065	1.57234	0.707503	0.898457
ENSGALG00000010237	NPC2	2.13795	0.385094	5.55177	2.82793e-08	6.74933e-05	306.056	315.69	163.444	149.208	116.373	91.3594	619.79	1614.33	781.764	516.973	509.492	650.706
ENSGALG00000010593	GALC	1.55116	0.393488	3.94208	8.07786e-05	0.0152204	48.5347	33.8761	18.3174	15.1621	10.8193	12.7111	63.4665	101.249	55.7299	67.1207	35.9885	59.7417
ENSGALG00000010645	ENPP6	1.21895	0.33899	3.59582	0.000323372	0.031717	2.13661	1.13826	1.97191	1.3598	2.78251	1.6458	3.25888	7.27353	5.48141	3.61162	1.29276	3.17954
ENSGALG00000011858	KCNH5	-1.50328	0.405923	-3.70336	0.000212762	0.0251797	0.85326	0.300175	1.06996	1.00741	1.14807	1.46404	0.207799	0.316575	0.725512	0.221923	0.292713	0.385376
ENSGALG00000013072	AKR1B10	1.55609	0.406955	3.82375	0.000131438	0.0204587	25.3099	15.2218	7.91827	12.74	7.98081	6.52869	23.8129	52.9047	22.3738	58.2266	15.1366	33.1573
ENSGALG00000014908	FST	-1.8494	0.376147	-4.91669	8.80182e-07	0.0009003	41.3653	33.893	152.67	77.5465	192.296	134.083	21.282	25.1696	16.9323	43.6735	24.4644	20.9016
ENSGALG00000014938	ABHD3	1.26686	0.356941	3.5492	0.000386406	0.0357604	7.06998	9.72662	4.44795	3.74944	2.65589	2.09378	9.86553	14.0955	10.8894	10.9919	9.82431	11.5387
ENSGALG00000015205	TYRP1	2.94036	0.744254	3.95075	7.79076e-05	0.0149841	0.410454	0.511933	0.0831071	0.259018	0.0641197	0	1.46493	2.22232	1.43171	2.54314	0.578663	1.14357
ENSGALG00000015627	HAPLN1	1.19011	0.307472	3.87062	0.000108559	0.0180764	6.48714	11.2246	4.85835	9.36921	5.07181	7.34739	15.1409	14.33	13.8361	7.29	19.2058	25.338
ENSGALG00000016448	KCNF1	-1.56563	0.38165	-4.10227	4.09116e-05	0.00992974	1.48103	0.70415	3.25948	2.64946	5.00406	4.25715	0.63306	0.597559	0.781026	1.29375	1.0698	0.892043
ENSGALG00000016478	MATN3	1.19654	0.278911	4.29003	1.78649e-05	0.00556142	33.9436	38.5565	18.4796	23.1098	16.547	19.3141	63.1006	68.5625	49.8894	29.7342	48.9235	60.8093
ENSGALG00000016498	MFSD2B	1.97229	0.447381	4.40852	1.04079e-05	0.00438357	1.77617	0.386563	0.524266	0.490052	0.420394	0.117211	1.32683	2.12877	2.25642	1.36142	2.8446	2.91833
ENSGALG00000016522	PPEF1	-1.14527	0.298724	-3.83388	0.000126136	0.0202755	6.6234	3.38494	10.1427	4.96907	16.5808	16.8981	2.69565	3.16653	6.34532	3.90827	2.65313	3.64918
ENSGALG00000016945	LECT1	-2.93867	0.433934	-6.77215	1.26881e-11	1.54232e-07	3.28319	4.38968	11.8854	20.7074	15.8532	16.7544	1.79058	2.04407	0.661178	1.94303	1.13646	0.548966
ENSGALG00000017191	ANGPTL5	2.05634	0.474922	4.32985	1.49211e-05	0.00496307	0.541174	0.632832	0.310317	0.312685	0.438491	0.341182	1.46461	0.923565	3.81696	0.379852	2.21381	1.50586
ENSGALG00000017276	ARHGEF5	-1.01689	0.278832	-3.64695	0.000265371	0.0282597	0.69006	0.663704	1.48715	0.980169	1.43254	2.1221	0.383436	0.458159	0.944423	0.453737	0.38614	0.616125
ENSGALG00000023904	FIBIN	1.38375	0.215829	6.41134	1.44248e-10	6.88542e-07	59.5472	50.9587	47.274	60.9046	31.9103	33.981	110.397	149.01	103.974	109.13	101.299	112.956
ENSGALG00000024047	MYCL	-1.27334	0.283632	-4.48943	7.14136e-06	0.0035315	33.0603	21.5878	69.3564	22.6002	53.9979	48.0759	10.4186	16.6179	20.871	20.6738	12.2366	13.1667
ENSGALG00000026790	DMRT2	2.11687	0.591801	3.577	0.000347556	0.0329603	1.27873	1.30656	0.732332	0.188008	0.394993	0.272679	2.79875	6.53684	3.54324	1.40775	1.45388	1.06206
ENSGALG00000027090	LOC422926	-4.41377	1.26289	-3.49498	0.000474099	0.0404113	80.2504	24.8758	2956.42	268.827	3872.23	1808.93	10.4052	7.7965	326.248	22.495	17.5348	16.8251
ENSGALG00000029596	HAS2	1.25453	0.200504	6.25688	3.92753e-10	1.40606e-06	2.63016	2.50379	2.07957	2.21738	2.4809	2.0166	3.99328	7.31286	3.62871	3.88233	4.97503	6.07068
ENSGALG00000030160	DRC7	1.10933	0.318099	3.48738	0.000487769	0.0410874	2.78586	1.42121	0.687703	1.75054	1.25158	1.30696	2.52844	3.69266	1.87919	4.63791	2.42465	3.16102
ENSGALG00000030512	PROCA1	-2.53277	0.585532	-4.3256	1.5212e-05	0.00496307	3.66758	3.88853	10.7621	50.5257	15.0455	16.244	0.700816	2.34138	3.83374	5.03806	1.70491	1.66872
ENSGALG00000031105	SLC4A4	1.08982	0.299748	3.63581	0.00027711	0.0285492	3.62919	3.05418	5.50921	3.35041	4.96989	3.74791	2.78141	11.1615	8.52999	12.8493	5.93935	6.80572
ENSGALG00000032402	VSTM2B	1.51994	0.39851	3.81405	0.000136708	0.0210501	6.12054	4.41527	1.2753	1.79518	2.37093	3.52721	9.48043	14.5721	5.2782	6.97985	8.0741	8.90554
ENSGALG00000033089	LOC414835	-1.03025	0.182781	-5.63651	1.7353e-08	4.96989e-05	1.63735	1.58103	2.41383	1.2457	2.01424	1.82913	0.686526	1.26092	0.782923	0.590836	0.714407	0.796076
ENSGALG00000033535	RGS16	-1.07157	0.288963	-3.70832	0.000208636	0.0248972	8.85046	3.38408	6.3373	2.69381	9.14217	8.88157	2.63894	3.09875	2.99896	3.39469	2.24776	2.60125
ENSGALG00000033925	LOC422895	1.19217	0.26225	4.54594	5.46904e-06	0.0032504	1.00422	0.88272	0.969279	0.733875	0.983909	1.01304	2.42782	3.76246	2.6125	2.6634	0.940269	1.17222
ENSGALG00000035219	ALB	2.01883	0.444856	4.53817	5.67458e-06	0.0032504	9.70503	9.79451	6.88211	2.45788	3.5705	1.90985	20.7802	35.182	23.441	7.42254	12.1663	30.1682
ENSGALG00000036133	KLF15	-1.06332	0.286586	-3.71031	0.000207007	0.0248972	4.87571	3.32006	7.44567	3.88723	12.7408	8.1788	2.72718	4.08343	2.59346	3.07127	2.59063	2.36628
ENSGALG00000036346	AMH	-1.90234	0.517554	-3.67564	0.000237254	0.0267517	39.2023	23.946	171.231	50.9427	167.375	118.22	17.2712	10.6496	69.606	12.3909	15.4721	16.0549
ENSGALG00000036686	PLTP	1.8929	0.428584	4.41664	1.00249e-05	0.00438357	34.7662	22.6962	10.3766	26.3395	21.1596	12.9612	65.5633	88.908	52.7997	163.757	20.9989	55.0291
ENSGALG00000036831	LOC101749846	1.18583	0.274176	4.32505	1.52497e-05	0.00496307	0.372953	0.28259	0.33192	0.382557	0.652954	0.63371	0.724224	0.819474	1.25942	1.16389	0.652608	0.841258
ENSGALG00000038884	SRL	1.98083	0.409977	4.83156	1.35471e-06	0.00114114	2.28011	1.90411	2.37127	2.88507	0.613383	0.369312	2.8857	7.03029	11.621	4.55849	8.94981	6.18966
ENSGALG00000039145	CA8	-1.74772	0.487999	-3.58139	0.000341768	0.0326274	0.165964	0.214731	0.682357	0.685704	1.16634	1.08928	0.285757	0.244486	0.195662	0.362349	0.208767	0.0930853
ENSGALG00000039772	RGS7	-1.9869	0.512662	-3.87566	0.000106338	0.0179148	0.153506	0.581677	0.551045	0.526679	1.53127	0.565148	0.11943	0.242403	0.18883	0.205155	0.143564	0.0730879
ENSGALG00000041344	FABP5	2.16227	0.478284	4.52089	6.15806e-06	0.00339167	3.74836	7.19005	5.4707	6.18404	7.07691	4.92014	3.76967	15.3629	17.759	57.0121	10.4173	33.4403
ENSGALG00000041826	S100A6	1.03133	0.217239	4.74743	2.06019e-06	0.00159665	369.869	254.07	170.87	304.006	316.017	241.243	402.165	633.281	453.017	496.499	455.083	572.676
ENSGALG00000042836	KCNH2	1.37897	0.307675	4.48189	7.39839e-06	0.0035315	16.9002	13.6217	6.0139	13.3727	6.04925	6.9544	24.9044	28.0842	19.0949	24.7963	21.1422	32.5314
ENSGALG00000043909	MSMB	1.8326	0.497486	3.68373	0.000229843	0.0266008	0.230633	1.00214	2.55397	1.61765	2.92378	1.8049	1.59053	8.07741	6.93382	7.14479	3.40303	5.3724
ENSGALG00000046810	-	-1.9102	0.55191	-3.46107	0.000538038	0.0445358	0.155478	0.125655	0.63951	0.285206	0.991662	0.84478	0.213373	0.0361458	0.120029	0.0985806	0.118832	0.0677312
ENSGALG00000047108	-	1.55811	0.375188	4.15287	3.28333e-05	0.0085486	0.27981	0.226747	0.15251	0.243206	0.214707	0.126943	0.359533	0.461613	0.592768	0.624428	0.485437	0.551349
ENSGALG00000047706	-	-1.25075	0.319861	-3.91028	9.219e-05	0.0164026	1.27646	1.12275	2.09703	2.42286	4.04944	2.81427	0.939573	0.612186	0.602502	1.24343	1.01108	0.652985
ENSGALG00000047771	PGF	1.81887	0.486556	3.73824	0.000185312	0.0230753	29.637	26.7629	5.95451	11.495	3.9889	3.64277	37.6325	66.831	28.6282	58.8631	36.5127	44.5118
ENSGALG00000049807	-	1.12711	0.308552	3.6529	0.000259291	0.0282597	11.0362	19.8727	8.90775	13.131	9.07155	11.6196	12.2865	43.8395	14.7102	28.602	22.0729	31.5503
ENSGALG00000049967	-	-3.07457	0.710828	-4.32534	1.52295e-05	0.00496307	0.116455	0.0712312	0.112894	0.18741	0.635667	2.04256	0.0520983	0.070833	0.11615	0.0215972	0.0221164	0.115758
ENSGALG00000050381	-	-1.04271	0.302745	-3.44418	0.000572799	0.0451577	0.315853	0.278096	0.595353	0.243109	0.473232	0.489567	0.203121	0.183078	0.0864744	0.125145	0.172175	0.213801
ENSGALG00000050611	-	1.23908	0.283995	4.36304	1.2827e-05	0.00496307	87.3767	87.1366	53.695	115.478	56.3127	45.6401	221.543	155.44	93.9274	178.789	107.742	198.606
ENSGALG00000051300	-	-1.87056	0.448503	-4.17068	3.03698e-05	0.00805363	2.65539	1.46263	9.70664	4.81105	9.97654	6.09195	1.48255	0.957822	1.00672	3.24495	1.38731	0.696548
ENSGALG00000052094	-	-3.06613	0.902432	-3.39763	0.000679726	0.0484263	0.254274	0.127623	0.856863	0.445142	0.326057	2.33802	0	0.0493728	0.185909	0.0899074	0	0.0920155
ENSGALG00000052645	-	1.07493	0.282994	3.79843	0.000145616	0.0217257	58.222	99.925	54.9803	89.3371	51.3335	41.2389	82.0587	176.549	80.6298	136.754	117.861	171.463
ENSGALG00000052818	-	1.05568	0.294543	3.58413	0.000338206	0.0325041	94.3941	47.4709	31.0078	53.8145	37.2394	36.678	123.728	97.6506	45.5177	84.1499	85.973	137.919
ENSGALG00000053525	-	-2.16034	0.455597	-4.74178	2.11846e-06	0.00159665	0.0952801	0.0480539	1.40936	0.128684	0.366617	1.12137	0	0.254087	0.885004	0.111977	0	0.104065
ENSGALG00000053549	ADAM8	1.26183	0.329362	3.83112	0.000127563	0.0202755	0.442946	0.384551	0.417329	0.449102	0.580551	0.0786408	0.503101	1.40987	0.620247	1.35062	0.476095	0.832829
ENSGALG00000054260	-	-2.16534	0.517835	-4.18153	2.89551e-05	0.00805363	1.15829	0.200616	2.91763	0.876602	4.2915	4.42749	0.408667	0.498163	0.421886	0.232427	0.321721	0.519232
ENSGALG00000054404	-	-2.04635	0.577412	-3.544	0.000394111	0.0359469	0.147999	0.209945	0.413472	0.41641	0.738486	1.89617	0.128791	0.0708755	0.33297	0.10485	0.149963	0.172559
ENSGALG00000054873	NPPC	2.1651	0.480544	4.50553	6.62074e-06	0.00351145	0	0	0	0	0	0	0	0.568344	0	0	0	0

## Sheet: C-DEGs in LWF versus LYF group
ENSEMBL	SYMBOL	log2FoldChange	lfcSE	stat	pvalue	padj	LWF-1	LWF-2	LWF-3	LWF-4	LWF-5	LWF-6	LYF-1	LYF-2	LYF-3	LYF-4	LYF-5	LYF-6
ENSGALG00000000242	EBF2	-2.2169	0.820689	-2.70126	0.00690773	0.0292463	0.254705	0.820759	1.31097	0.131612	0.98472	8.02355	0.0575998	0	1.39504	0.127002	0.0860774	0.209251
ENSGALG00000000293	A2ML4	-1.51447	0.406013	-3.7301	0.000191404	0.0016647	0.0787175	0.121084	0.0332453	0.206441	0.129547	0.0462245	0.0376987	0.0741277	0.0623808	0.071555	0.0328655	0.0706335
ENSGALG00000000313	TNNI1	1.84003	0.398019	4.62296	3.78307e-06	6.07239e-05	0.391225	0.810498	0.50118	0.838261	0.631488	0.136196	2.07213	1.01077	0.903369	2.23129	1.87025	1.47655
ENSGALG00000000314	-	-1.3747	0.395628	-3.47472	0.000511384	0.00373242	25.9118	31.3937	42.2613	32.9413	42.4057	132.52	9.38045	17.462	40.476	10.406	10.4694	13.1031
ENSGALG00000000318	CSRP1	1.17704	0.148901	7.90487	2.68223e-15	3.64221e-13	104.81	108.666	96.4563	98.1092	112.14	107.79	286.121	182.81	180.63	166.799	269.683	213.15
ENSGALG00000000364	STC1	1.71239	0.298241	5.74163	9.37721e-09	3.21575e-07	3.76545	3.46848	1.6347	2.25682	1.85988	1.70389	7.204	14.2356	7.57576	4.81221	6.38103	4.10319
ENSGALG00000000379	ITGB3	1.20221	0.299709	4.01125	6.03974e-05	0.000632445	2.83422	2.4599	2.35864	1.64455	2.80063	7.54702	7.95914	6.61352	6.20077	4.2918	8.27769	7.69349
ENSGALG00000000402	LOXL2	1.25624	0.190527	6.59352	4.29516e-11	2.41073e-09	15.1982	20.2378	19.3667	10.9712	16.8616	11.6867	40.5175	33.5784	39.1146	21.9074	41.1305	38.4241
ENSGALG00000000441	KCNA10	-2.77878	0.668221	-4.15848	3.20374e-05	0.000367971	0.124409	0.144279	0.157047	0.411285	0.254867	0.724736	0.0198862	0.0521171	0	0.0743483	0.0256633	0.0988412
ENSGALG00000000442	KCNA2	-1.03778	0.196933	-5.26973	1.36627e-07	3.40818e-06	5.53346	4.90283	7.10394	5.80087	6.62911	8.15288	2.10921	1.72659	4.15968	3.09329	2.5151	3.22795
ENSGALG00000000461	MRC2	1.07392	0.203649	5.27338	1.33933e-07	3.37095e-06	32.6768	34.5911	41.9142	29.3511	46.6537	31.6795	84.982	50.3991	70.9059	42.5535	93.059	72.8229
ENSGALG00000000476	LRRTM4	-1.29337	0.482238	-2.68201	0.0073181	0.0306599	0.437847	0.170761	0.333335	0.171447	0.407289	0.823786	0.0737038	0.22218	0.245502	0.139224	0.214683	0.127709
ENSGALG00000000497	C26H6ORF222	-1.8436	0.429382	-4.29362	1.75782e-05	0.000221543	5.2171	4.29474	3.7062	7.15863	1.95964	1.41876	0.958507	1.22004	0.47128	1.57183	0.595648	1.0006
ENSGALG00000000504	ETV7	-1.0166	0.343461	-2.95986	0.00307778	0.0158594	1.0233	1.02727	1.23187	0.741302	1.01752	1.77801	0.401496	0.55651	0.706244	1.3862	0.38057	0.358587
ENSGALG00000000585	MYL4	1.95336	0.189035	10.3333	4.97996e-25	2.09632e-22	3.99469	4.49279	3.51461	2.49211	3.30637	4.28969	10.7794	10.0927	18.2463	10.2455	15.1951	14.6983
ENSGALG00000000604	NKAIN1	1.18606	0.242639	4.88817	1.01776e-06	1.94961e-05	1.11643	1.1478	1.01937	1.07527	1.42027	2.28694	2.40719	2.1761	2.68938	1.8752	3.90194	3.84243
ENSGALG00000000731	THEMIS2	1.18192	0.414886	2.84878	0.00438876	0.0206851	0.681822	0.407079	0.519962	0.551411	0.439315	0.449147	0.691502	1.37073	0.48526	2.61099	0.54852	0.535819
ENSGALG00000000902	KDF1	-1.51304	0.437901	-3.45521	0.000549862	0.00397067	3.75376	6.25776	6.37725	6.97559	6.78348	20.4482	1.37026	2.30531	6.92675	3.01088	1.09999	1.76411
ENSGALG00000000927	ANGPTL2	1.07514	0.268351	4.00646	6.16355e-05	0.000642613	17.3461	13.6494	16.5572	5.63147	9.22211	11.6949	28.0851	17.7686	24.935	13.4646	26.8903	28.9709
ENSGALG00000001080	NR5A1	1.09359	0.212727	5.14079	2.73581e-07	6.25656e-06	43.9227	40.7137	27.6936	37.5206	39.9064	26.9887	65.8554	94.8412	49.1311	75.138	60.9326	80.8184
ENSGALG00000001115	MMEL1	-1.4909	0.436178	-3.41811	0.000630574	0.00446493	17.88	7.10505	4.75238	13.3642	4.53407	4.24815	2.45341	1.79764	1.76329	5.9158	2.03165	3.02856
ENSGALG00000001207	PLCH2	1.46189	0.475476	3.07458	0.00210796	0.0117998	0.494995	0.356183	0.197416	1.47129	0.374595	0.293552	0.666023	2.40694	1.76835	1.74981	1.04184	0.696969
ENSGALG00000001220	HERPUD1	1.14891	0.198293	5.79401	6.87237e-09	2.44645e-07	14.2377	17.2894	27.7992	20.7511	22.0567	24.4683	29.2127	57.2065	55.7334	31.2965	44.0679	36.6985
ENSGALG00000001244	CFAP52	-2.19831	0.46696	-4.70769	2.50536e-06	4.28766e-05	2.1159	0.635871	1.85732	2.419	4.60957	8.60416	0.299973	0.330409	1.09647	0.618551	0.694883	0.51809
ENSGALG00000001264	PLXNA2	1.09617	0.150869	7.26573	3.71042e-13	3.32319e-11	5.25723	5.50415	6.07446	5.29606	6.36593	4.1149	8.64909	14.0967	9.79323	10.4246	10.0147	10.6253
ENSGALG00000001311	ARHGAP44	-1.96149	0.35877	-5.46727	4.5701e-08	1.3087e-06	1.42145	1.49437	1.30629	1.72621	2.08812	4.48862	0.434423	0.236516	0.917469	0.401483	0.289024	0.441887
ENSGALG00000001383	HTR4	-1.99486	0.756695	-2.63628	0.00838212	0.0339601	0	0.216608	0.102972	0.0781409	0.0501033	0.267413	0.078567	0	0	0.0887473	0.151799	0.0902672
ENSGALG00000001405	IRF6	-2.05995	0.486528	-4.23398	2.29588e-05	0.000275735	23.7143	41.0788	41.9009	37.2155	48.3143	120.488	4.09194	6.98987	36.5862	9.69291	5.8129	5.92828
ENSGALG00000001449	STRA6	4.82383	0.516499	9.33947	9.68147e-21	2.76299e-18	1.57716	0.268007	0.0991782	1.35816	0.620174	0.36978	18.1468	22.5742	13.4875	20.2974	18.3207	14.7202
ENSGALG00000001480	FAM212B	-1.51186	0.373872	-4.0438	5.25912e-05	0.000559699	1.34149	2.90183	2.74781	2.59175	3.16226	9.07556	0.730561	0.703716	1.70946	1.26932	1.00846	1.37694
ENSGALG00000001559	ZP3	1.72194	0.316203	5.44567	5.16095e-08	1.45075e-06	1116.47	1081.1	508.092	711.303	721.308	460.423	1856.48	4186.95	1477.64	2297.78	1769.99	2342.86
ENSGALG00000001620	CUTA	-1.61641	0.551353	-2.93172	0.00337096	0.0170349	1.78372	1.80397	1.67278	1.6269	1.78255	4.1485	0.327851	0.604376	1.48855	0.949717	0.0608669	0.202606
ENSGALG00000001633	DUSP26	-1.41701	0.208596	-6.7931	1.09751e-11	7.27553e-10	17.0587	16.6126	21.543	18.2299	18.7015	34.0027	6.60347	6.09154	11.7529	6.73205	4.55145	6.91582
ENSGALG00000001764	HCN4	1.35956	0.363807	3.73705	0.000186195	0.00162843	1.35286	1.30392	0.796307	1.03775	1.55467	1.2376	5.36471	1.42284	1.73798	1.11259	4.55185	2.88321
ENSGALG00000001768	TENM2	-1.08446	0.293498	-3.69495	0.000219931	0.0018656	1.99732	2.71374	2.68119	2.94405	1.91987	3.22312	0.686321	0.939103	2.08533	1.61803	0.71977	0.744564
ENSGALG00000001857	FAM132A	-1.19896	0.439301	-2.72924	0.006348	0.0274212	3.81624	3.06641	4.06096	3.15866	6.20781	16.8817	1.64101	1.05385	5.65903	2.25886	1.67493	2.02886
ENSGALG00000001862	ST6GALNAC1	-1.43258	0.259083	-5.52944	3.21254e-08	9.71146e-07	2.25154	1.7486	1.58861	2.68782	2.83171	2.50938	0.700875	0.360574	1.34213	0.807043	0.803895	0.561645
ENSGALG00000001883	ST6GALNAC2	-1.38146	0.540736	-2.55478	0.0106255	0.040625	3.60099	3.24653	5.33453	2.42145	4.07307	18.8134	1.01673	1.54313	6.83579	1.1633	1.16513	1.00084
ENSGALG00000001918	DNAJB5	1.03793	0.15561	6.67008	2.55668e-11	1.51582e-09	3.15558	3.86571	3.71679	3.76477	4.28867	3.84675	6.06231	9.80349	6.01964	7.0457	5.70937	7.02343
ENSGALG00000001926	HSPB1	1.24938	0.1391	8.98186	2.66225e-19	6.40385e-17	99.6713	124.758	149.961	135.602	103.752	115.31	291.371	255.745	274.94	231.606	267.05	270.926
ENSGALG00000001956	OLFML3	1.0472	0.233011	4.49419	6.98342e-06	0.000102427	8.95318	9.10769	11.6021	8.89236	9.87327	7.51455	23.182	14.7459	18.0645	7.86293	19.891	20.8291
ENSGALG00000001983	FNDC7	-1.10683	0.394509	-2.80558	0.0050226	0.0229624	0.977398	0.716105	0.760507	0.499501	0.780094	3.02721	0.521873	0.544094	0.822955	0.19649	0.384426	0.370257
ENSGALG00000002000	-	-1.5561	0.366226	-4.249	2.14724e-05	0.000262184	21.6686	29.803	28.1602	31.7986	34.3666	78.754	6.13608	8.16768	28.6789	10.0307	6.37568	7.49054
ENSGALG00000002046	SYT15	-1.03072	0.143929	-7.16127	7.99321e-13	6.64991e-11	7.22059	8.58901	7.01981	9.04872	8.30534	8.3548	4.13659	3.33656	3.37123	3.29289	2.90486	4.52158
ENSGALG00000002103	TPPP3	1.37878	0.433246	3.18244	0.00146041	0.00877916	11.3136	16.6249	6.47373	2.47919	6.08852	7.65758	13.78	31.2239	11.0775	25.6093	11.8319	21.891
ENSGALG00000002132	KCNIP1	-1.32769	0.241572	-5.49604	3.8842e-08	1.14741e-06	7.73167	5.16458	7.21643	9.90823	5.79131	5.71227	1.96997	2.30947	4.58499	3.02013	1.80404	1.99849
ENSGALG00000002150	CPEB1	-1.92188	0.714241	-2.6908	0.00712818	0.0300406	5.79652	7.29311	14.1703	7.65097	10.5649	59.2018	1.30106	1.97221	14.8806	1.94924	2.13675	2.82361
ENSGALG00000002152	GABRP	-1.63459	0.455323	-3.58996	0.000330732	0.00260714	0.826022	0.571407	0.719933	1.35934	0.612031	0.297057	0.15812	0.0598967	0.200464	0.400302	0.273125	0.242147
ENSGALG00000002167	PATL2	-1.20015	0.275306	-4.35932	1.30468e-05	0.000173661	4.65261	4.91884	6.55319	5.49671	8.13832	16.0521	2.05244	2.17649	5.22532	2.46648	2.33078	2.84309
ENSGALG00000002182	NR5A2	4.20331	0.235649	17.8371	3.64003e-71	6.12908e-67	3.42645	4.09056	2.84048	2.33411	3.58104	1.40759	48.3271	68.7395	51.9084	49.7433	35.3174	43.8456
ENSGALG00000002198	FHOD1	1.54809	0.179324	8.6329	5.98138e-18	1.25893e-15	3.08485	3.78579	3.59106	3.62135	2.97237	2.54418	8.88839	9.539	6.45955	10.5224	8.69751	8.66421
ENSGALG00000002204	-	-1.48539	0.499743	-2.9723	0.00295578	0.0153627	1.85471	1.76712	4.79534	3.61372	3.7287	13.8868	1.03599	0.839438	4.0792	0.914213	0.915476	1.36168
ENSGALG00000002289	CHAT	-3.25219	0.959857	-3.3882	0.000703533	0.00486892	0.299851	0.0683388	0.218645	0.0149229	0.0176421	0.049533	0.0406647	0	0	0	0	0
ENSGALG00000002325	-	2.07377	0.699598	2.96423	0.0030344	0.0156681	0.0287923	0.221667	0.0610816	0	0.0595596	0.111918	0.22942	0.208407	0.255758	0.410667	0.241496	0.0864564
ENSGALG00000002335	DOCK3	-1.24816	0.452678	-2.75727	0.00582864	0.0257053	0.937063	0.334722	0.556927	0.670549	0.385273	0.884674	0.208867	0.0951943	0.379002	0.340547	0.135603	0.348057
ENSGALG00000002358	CDO1	1.46825	0.346539	4.2369	2.2663e-05	0.000273548	1.60374	1.45818	1.99613	1.52926	2.31922	1.15401	4.84436	1.76585	3.87211	1.69894	6.53554	6.67282
ENSGALG00000002427	SMIM5	-1.21311	0.475299	-2.5523	0.0107014	0.0408041	4.80173	6.21846	7.00207	4.55726	5.38767	14.6429	1.53744	1.8804	8.38374	2.46197	1.27098	1.64086
ENSGALG00000002428	ZP2	-2.1175	0.601931	-3.51785	0.000435059	0.0032529	45.0484	45.2394	47.3309	36.0078	69.6734	244.114	7.77682	14.2963	49.5759	5.26401	10.4212	13.2151
ENSGALG00000002439	BDP1L	1.22719	0.368926	3.3264	0.000879769	0.00582523	12.5519	7.23669	3.47818	6.33246	5.69154	2.12115	12.0002	22.4952	10.4657	12.7237	8.57056	12.1767
ENSGALG00000002452	AQP3	-1.96556	0.285432	-6.88626	5.72797e-12	4.00197e-10	17.7227	18.2816	15.1539	14.9405	17.0366	33.16	2.78213	5.41612	9.06458	2.84054	2.89847	4.29088
ENSGALG00000002470	CYP27A1	-1.08588	0.205546	-5.28289	1.27159e-07	3.22941e-06	17.5709	19.8488	18.472	20.8053	23.2087	31.9479	7.36311	10.4289	13.6829	8.9966	4.98963	9.20786
ENSGALG00000002484	CRYM	-1.2045	0.267935	-4.49549	6.94085e-06	0.000101892	13.5325	16.8923	17.4681	15.28	18.995	38.1172	6.07145	6.72888	15.6048	5.85115	7.47452	5.1979
ENSGALG00000002546	COL5A1	1.26371	0.266785	4.7368	2.17115e-06	3.79231e-05	54.9076	72.0882	84.0772	62.6388	77.9646	47.7795	196.493	98.4243	148.871	64.1508	202.54	162.492
ENSGALG00000002555	RET	-2.54801	0.905893	-2.81271	0.00491259	0.0226068	0.869373	0.0529361	1.89009	0.749952	4.89934	3.64203	0.125298	0	0.208859	0.294656	0.794093	0.201998
ENSGALG00000002561	FANCE	-1.34538	0.146959	-9.15477	5.44762e-20	1.43323e-17	12.0935	19.3982	13.5396	16.6115	18.6821	23.2334	4.47107	5.83984	6.83815	5.96577	6.03286	6.0589
ENSGALG00000002563	TPM4	1.09054	0.323553	3.37053	0.000750236	0.00511181	65.8047	57.1107	50.889	68.9379	63.1141	62.6294	136.597	104.6	90.1625	59.9636	146.765	131.361
ENSGALG00000002576	ASL2	1.05815	0.295483	3.58107	0.000342183	0.00268235	1.84204	2.75266	2.30906	1.02528	0.947467	2.56587	1.90344	4.36772	2.85594	5.58171	2.5941	4.48158
ENSGALG00000002598	TPST1	1.60535	0.122511	13.1038	3.13371e-39	5.86283e-36	18.6772	19.2019	26.572	26.7254	25.0686	28.1211	61.5334	73.3054	62.4963	66.5978	66.2553	61.4522
ENSGALG00000002623	PCOLCE2	2.33255	0.346191	6.73775	1.60862e-11	1.00319e-09	0.91084	2.18206	1.12	0.371353	1.0516	0.834916	5.65246	5.64412	4.29014	1.99236	7.37531	6.85592
ENSGALG00000002637	RBP7	1.64125	0.372305	4.40834	1.04164e-05	0.000142827	97.3547	108.764	37.3592	28.6124	66.7022	57.7425	162.503	368.536	130.313	109.003	117.519	262.194
ENSGALG00000002645	PIWIL1	-1.81099	0.73546	-2.46239	0.0138015	0.0492767	2.55012	2.0885	4.8341	2.13433	3.87437	16.8958	0.383049	0.897347	5.42052	0.513834	0.645296	0.674686
ENSGALG00000002671	TMEM132D	-1.69657	0.356495	-4.75904	1.94515e-06	3.42241e-05	3.06664	4.47207	3.69868	2.10253	2.61668	4.88187	0.378303	0.930697	2.01413	1.31909	0.830294	0.413179
ENSGALG00000002675	SCUBE3	1.0918	0.227716	4.79457	1.63024e-06	2.93583e-05	3.12415	2.4184	2.65005	5.51966	4.15071	4.41068	6.57973	11.3617	6.34901	6.58824	6.38391	6.61944
ENSGALG00000002766	MLKL	4.02983	0.423809	9.50858	1.93274e-21	6.02657e-19	0.0230355	0.0893639	0.0241432	0.0400696	0.0705969	0.0905257	0.49159	0.699949	0.456596	0.549326	0.592091	0.430477
ENSGALG00000002771	CRIP1	1.41051	0.167255	8.43328	3.36105e-17	5.95719e-15	69.7946	67.8984	58.1181	57.9035	60.1371	64.8612	130.303	174.667	119.518	200.063	132.425	151.456
ENSGALG00000002775	FA2H	-1.37886	0.394424	-3.49587	0.000472513	0.00348802	3.06406	2.31021	3.36381	2.36143	3.50778	7.84386	0.857985	1.65426	2.75128	0.540355	0.66601	0.722841
ENSGALG00000002789	MAP2	1.63205	0.266143	6.13225	8.66433e-10	3.78935e-08	0.713475	0.985577	1.21345	0.620663	0.781779	1.8	2.17209	3.77422	2.42818	3.76361	2.21477	2.82761
ENSGALG00000002804	RND2	-1.54503	0.497718	-3.10422	0.0019078	0.0108889	1.95131	1.70211	2.07979	2.02237	1.98884	8.51694	0.618689	0.397421	2.68015	0.665489	0.375984	0.736539
ENSGALG00000002974	SPHKAP	2.17228	0.495618	4.38296	1.17076e-05	0.000157579	0.0513462	0.0343637	0.0660979	0.0209933	0.0220193	0.0563034	0.126421	0.0862894	0.246847	0.215151	0.0481084	0.165792
ENSGALG00000002988	PHGDH	1.48988	0.493444	3.01934	0.00253322	0.0136276	0.776828	0.700282	0.676081	0.537579	0.637172	1.01432	0.842012	1.31198	0.875217	0.516252	2.14905	6.07724
ENSGALG00000003011	TOM1L1	1.03881	0.36999	2.80766	0.00499026	0.0228642	23.4542	6.94713	3.68984	15.4247	13.8302	8.05249	26.6561	26.2422	15.1439	25.9297	23.572	15.8143
ENSGALG00000003034	SS2	1.69029	0.582445	2.90207	0.0037071	0.0182836	0.173607	0.701877	0.187733	0	0.366677	0.552674	0.298318	0.947986	0.175284	2.21802	0	0.352707
ENSGALG00000003137	RFLNA	1.33279	0.253055	5.2668	1.38822e-07	3.45272e-06	2.27579	2.33332	2.56271	3.49234	5.25866	1.30487	5.49034	6.49518	5.18327	2.66773	8.56909	9.13657
ENSGALG00000003148	SPAG16	-1.19144	0.376775	-3.1622	0.00156583	0.00928747	2.31275	3.27583	4.13514	3.54803	3.95834	10.6732	1.279	1.34376	4.13095	1.40365	1.49197	1.92381
ENSGALG00000003163	GNAO1	1.30767	0.300872	4.34627	1.38472e-05	0.000182297	14.1412	12.4684	7.25929	13.9475	13.8815	5.12068	29.8146	35.3709	15.0405	13.8333	28.834	25.0303
ENSGALG00000003175	STKLD1	-1.3866	0.522931	-2.65159	0.00801127	0.0328049	3.14931	2.68754	3.78162	1.87722	3.98813	15.6548	1.22502	0.753831	4.88704	1.78968	1.84985	1.95492
ENSGALG00000003193	CRABP1	-2.01954	0.760327	-2.65615	0.00790393	0.032468	0.130333	0.314864	0.760022	0.739484	0.810138	2.10135	0	0	0.448928	0.193385	0.137261	0.324357
ENSGALG00000003217	LITAF	-1.6237	0.645943	-2.51369	0.0119477	0.0443214	1.75957	3.35108	4.84759	2.02275	4.27644	26.8899	0.852962	1.7048	7.53948	1.6325	0.80077	1.10156
ENSGALG00000003242	STAR	1.09823	0.419478	2.61809	0.00884241	0.0352816	297.24	115.69	97.3264	151.219	177.272	68.8111	596.308	292.557	134.639	123.411	349.78	304.986
ENSGALG00000003310	SLC45A2	3.72286	0.941348	3.95481	7.6594e-05	0.000772732	0	0	0.0249305	0.0202948	0.0242237	0.0690475	0.22901	0.0251506	0.0946861	0.0232385	0.0974023	0.49625
ENSGALG00000003354	KCNH4	-1.33013	0.416833	-3.19103	0.00141766	0.0085896	0.862591	0.86827	0.434318	0.719245	0.85869	0.396942	0.0969118	0.19607	0.113357	0.493279	0.106284	0.236001
ENSGALG00000003374	ESRP2	-1.60254	0.640543	-2.50185	0.0123547	0.0454209	0.534322	1.25334	1.42439	1.22736	1.29772	6.46694	0.30234	0.345185	2.27064	0.298393	0.214104	0.297653
ENSGALG00000003435	PGC	-1.23004	0.477832	-2.57421	0.010047	0.0389887	0.451324	0.76646	0.591243	1.03823	0.903625	1.92795	0.310874	0.0719459	1.0256	0.386302	0.2224	0.454728
ENSGALG00000003521	TPM1	1.42047	0.228971	6.2037	5.51492e-10	2.52149e-08	242.956	219.762	242.547	227.948	270.135	200.689	685.416	440.196	507.13	262.897	762.879	607.877
ENSGALG00000003529	SYNC	1.46637	0.130958	11.1972	4.20731e-29	3.22012e-26	3.74655	4.43469	3.36833	4.6288	4.62661	4.20839	10.5015	9.57439	8.71154	9.76051	12.5789	11.5831
ENSGALG00000003537	SGK2	-1.78806	0.459248	-3.89345	9.8828e-05	0.00095636	61.0651	53.3721	80.0292	69.6754	69.8975	224.208	12.1548	15.5666	75.5636	11.9273	14.1718	17.4579
ENSGALG00000003554	OPTC	1.13722	0.364886	3.11664	0.00182923	0.0105193	3.93878	2.67877	4.91155	6.64704	3.71441	4.47942	13.6836	3.52105	6.09769	4.02863	12.78	12.0828
ENSGALG00000003559	ACTR5	-1.18869	0.463971	-2.562	0.010407	0.0400258	7.77647	9.83911	13.3331	9.84536	11.9027	55.498	3.87311	5.44933	17.6674	5.27659	4.41759	5.64543
ENSGALG00000003569	TMEM130	-1.14011	0.201884	-5.64732	1.6297e-08	5.31802e-07	27.2425	23.8474	28.5881	29.3693	25.9107	25.7934	8.06467	13.5909	17.783	11.9739	6.52813	8.96946
ENSGALG00000003578	FN1	1.78687	0.15666	11.4061	3.89903e-30	3.2826e-27	91.0471	99.5033	97.5655	78.1637	100.628	73.0307	323.211	263.534	227.57	226.776	336.659	307.247
ENSGALG00000003588	IRX5	-3.43673	1.23934	-2.77303	0.00555364	0.0247517	0.152698	0.194717	0	0	0	0.707102	0	0	0.0501976	0.0539812	0	0
ENSGALG00000003590	C18H17orf58	-1.8392	0.295886	-6.21593	5.10202e-10	2.35172e-08	9.12634	9.76836	12.1794	10.9305	12.2967	20.6204	2.19679	2.46435	7.32313	1.69993	2.8131	2.88721
ENSGALG00000003595	-	1.23461	0.366272	3.37074	0.000749672	0.00511052	0.109536	0.356301	0.313846	0.164105	0.115973	0.381589	0.523826	0.460446	0.364857	0.592476	0.201321	1.00232
ENSGALG00000003644	C2CD4A	-1.7691	0.698108	-2.53413	0.0112727	0.0424915	3.23812	1.80416	4.86564	4.48666	2.74876	22.407	0.786694	0.311675	6.91179	1.45853	0.631731	0.750333
ENSGALG00000003647	SLC13A2	-1.79383	0.541539	-3.31246	0.000924799	0.00607041	0	0	0	0	0	0	0	0	0	0	0	0
ENSGALG00000003661	SETX	1.60075	0.21959	7.2897	3.10645e-13	2.90591e-11	7.69853	7.79915	4.26507	6.15566	6.27691	4.10001	13.9136	23.74	15.118	19.7216	11.4096	15.8146
ENSGALG00000003689	PAPSS2	1.60762	0.293885	5.47024	4.4942e-08	1.29356e-06	3.36602	7.19287	9.8495	3.5232	4.11581	3.10621	15.1255	21.0161	13.6758	11.8965	16.5425	11.331
ENSGALG00000003713	-	1.43103	0.443446	3.22706	0.00125069	0.00779533	0.0510191	0	0	0	0.106821	0	0.345508	0.162209	0.0509397	0.102679	0.0555996	0.313221
ENSGALG00000003750	PLCG1	2.30906	0.156712	14.7344	3.87465e-49	1.63103e-45	4.23076	5.15298	6.31093	5.26356	5.10279	5.99492	22.3147	29.0433	17.7204	28.3416	19.6145	20.4239
ENSGALG00000003770	ANXA2P2	1.3005	0.201207	6.46347	1.02327e-10	5.26905e-09	139.908	161.347	171.48	110.331	93.096	99.2713	243.17	406.604	313.066	253.837	228.869	295.591
ENSGALG00000003789	-	1.12374	0.307714	3.65191	0.000260299	0.00214114	0.891669	0.472896	0.873332	0.785387	0.425493	0.686891	1.10829	1.38112	0.819516	2.39143	1.13829	0.756137
ENSGALG00000003792	FYB	1.02739	0.170299	6.03286	1.61085e-09	6.59941e-08	2.25849	2.17633	2.71518	1.75472	3.28117	2.29629	4.36105	6.48898	4.5014	4.38341	3.85923	4.05262
ENSGALG00000003802	OTUD7A	-1.26188	0.215344	-5.85986	4.6327e-09	1.72012e-07	1.87045	2.10623	2.08673	1.83433	2.92352	3.34775	0.750722	0.687757	1.55047	0.96945	0.869534	0.754323
ENSGALG00000003803	DAB2	-1.15996	0.230109	-5.04092	4.63287e-07	9.91707e-06	121.917	111.288	144.341	96.6178	158.553	220.54	42.1292	66.6329	105.921	39.8968	43.9829	50.293
ENSGALG00000003819	-	1.08945	0.383014	2.84441	0.00444934	0.0209362	1.31794	1.98076	2.08316	2.63866	2.01562	7.4742	4.80481	10.5614	6.06704	3.99994	3.00228	1.53747
ENSGALG00000003904	MLPH	-2.48082	0.718914	-3.45079	0.000558956	0.0040307	0.619237	1.3627	0.647779	0.456755	1.94889	9.23394	0.14665	0.294705	1.23424	0.190246	0.30555	0.122885
ENSGALG00000003914	CALR3	-1.12947	0.413722	-2.73001	0.00633317	0.0273657	1.39739	3.24034	2.01747	2.73656	2.30471	7.48324	0.519232	1.53417	2.77644	1.21135	0.775668	0.900004
ENSGALG00000003921	DBNDD2	1.13147	0.149709	7.55783	4.0986e-14	4.60082e-12	13.6755	14.1704	14.4382	10.855	12.8015	15.5698	20.6728	34.5924	24.0801	25.9702	24.9714	31.7321
ENSGALG00000003952	RBPJL	-2.33917	0.327652	-7.13919	9.38807e-13	7.74884e-11	1.88131	1.64937	1.54781	3.11626	2.62931	4.96389	0.349676	0.22346	0.722196	0.560935	0.410695	0.689613
ENSGALG00000003980	IQCA1	-3.17631	0.608678	-5.21838	1.80498e-07	4.36671e-06	0.282502	0.197137	0.277256	0.0675318	0.503859	0.0897861	0.0482333	0	0.0309506	0.0154519	0.0624599	0
ENSGALG00000004033	GALNT10	1.40162	0.183858	7.62338	2.47127e-14	2.90988e-12	3.1824	2.85246	2.37405	2.27965	2.72956	1.91768	6.15224	8.36477	5.81347	5.30421	4.798	6.81021
ENSGALG00000004096	CHRNA7	1.48608	0.271793	5.4677	4.55915e-08	1.30778e-06	12.1542	9.67088	6.29381	9.72972	10.943	4.65215	16.5845	30.9627	19.1543	34.3368	18.0144	22.4265
ENSGALG00000004113	LOC422147	1.03192	0.184249	5.60066	2.13533e-08	6.74571e-07	2.48524	1.98188	2.16608	2.60361	2.14458	1.6615	5.02083	3.7411	3.75717	3.11053	3.43502	4.64987
ENSGALG00000004161	CCNB1	-1.35493	0.28073	-4.82647	1.38976e-06	2.55694e-05	281.204	380.857	376.046	334.179	413.519	624.558	83.1493	132.148	320.618	94.7063	115.513	115.073
ENSGALG00000004162	SLC16A6	-1.61617	0.430752	-3.75198	0.000175445	0.00155073	5.2462	3.50653	2.96733	4.46163	4.06359	21.0945	1.6479	1.80733	3.70139	1.1707	1.55911	1.45333
ENSGALG00000004196	UGT1A1	1.06828	0.432841	2.46806	0.0135847	0.04873	0.0978057	0.208035	0.0404574	0.098115	0.078439	0.163574	0.181927	0.431535	0.155349	0.112726	0.15476	0.192277
ENSGALG00000004199	TMEM184A	-1.85777	0.365898	-5.07729	3.82849e-07	8.38284e-06	10.2889	16.1103	14.2719	13.2357	17.3966	33.3351	2.17384	3.65302	11.6187	2.56231	3.42245	3.26015
ENSGALG00000004260	-	1.98488	0.56405	3.51897	0.000433224	0.00324206	0.0180301	0.017358	0.0580212	0.0160887	0.0378501	0.0546469	0.0882553	0.0930175	0.0535426	0.0553394	0.0194686	0.109253
ENSGALG00000004273	RALGPS2	-1.12628	0.184073	-6.11863	9.43859e-10	4.07505e-08	35.302	44.0145	35.6737	38.8083	42.1557	60.5982	14.029	15.7891	31.8545	14.7566	14.0985	18.7467
ENSGALG00000004286	COL13A1	-1.07865	0.207156	-5.20698	1.91941e-07	4.61042e-06	1.95136	2.12988	2.15172	1.50532	1.7229	1.29384	1.19653	0.575738	0.824627	0.951864	0.85395	0.729169
ENSGALG00000004306	SYT12	-1.32186	0.191735	-6.89419	5.41724e-12	3.86507e-10	5.38147	6.45459	8.0217	6.14926	9.67963	6.39154	1.93435	2.80209	3.19475	1.79617	2.22523	3.0467
ENSGALG00000004343	HPD	1.6313	0.345085	4.72723	2.27605e-06	3.95501e-05	0.451192	0.331783	0.296247	0.744021	0.17732	0.602696	1.11196	1.59337	0.825337	1.57418	0.653994	1.66447
ENSGALG00000004424	SEC16B	-1.14041	0.353793	-3.22339	0.00126685	0.00786739	0.569918	1.60796	0.485668	0.878235	0.497522	1.47781	0.230826	0.475465	0.450704	0.672094	0.129695	0.31061
ENSGALG00000004449	CYP3A5	-3.51119	1.18628	-2.95983	0.00307807	0.0158594	0	0.0796189	0.0283919	0	0.0275204	0	0	0	0	0.0535224	0	0
ENSGALG00000004581	NDST1	1.31708	0.155857	8.45054	2.89957e-17	5.36516e-15	15.5276	13.9888	11.134	15.6975	18.2871	16.2039	36.93	43.971	27.6723	31.8145	36.6629	36.6793
ENSGALG00000004725	LOC107057078	-1.41759	0.147555	-9.60719	7.45567e-22	2.46154e-19	223.543	184.788	173.761	250.697	224.966	290.315	68.7215	73.0672	98.5716	90.4864	60.4701	64.032
ENSGALG00000004777	AIFM2	1.70135	0.236619	7.19022	6.46871e-13	5.58564e-11	5.94955	5.03548	5.73904	10.2024	5.91751	3.54305	16.4719	22.6912	15.0284	20.2659	15.079	17.0204
ENSGALG00000004778	SLC47A2	1.33362	0.52364	2.54684	0.0108705	0.041355	0.0946175	0.137445	0.0761491	0.0417929	0.224778	0.0973112	0.219923	0.246999	0.164489	0.14294	0.468314	0.12031
ENSGALG00000004852	DNM1	-1.60247	0.249196	-6.43057	1.27129e-10	6.46706e-09	20.1223	24.9111	31.9347	20.6956	22.7761	33.2206	5.10848	7.82411	15.4463	5.77009	5.16359	6.44495
ENSGALG00000004860	RASD1	2.76832	0.268455	10.3121	6.21579e-25	2.49194e-22	2.06413	1.9768	1.71667	2.36851	2.30249	1.31248	17.1383	13.9723	7.76237	15.7753	8.06764	9.264
ENSGALG00000004903	CHST8	1.26161	0.398382	3.16683	0.0015411	0.00917545	1.18401	1.00025	0.386328	1.60367	0.496963	0.503966	1.81215	2.13643	1.18091	3.23334	0.826791	2.03315
ENSGALG00000004960	FBN1	1.08331	0.24925	4.34629	1.38459e-05	0.000182297	44.1561	45.5249	45.487	31.4498	52.6502	20.4704	98.2201	61.1845	87.7336	43.7362	93.6468	87.2789
ENSGALG00000004966	NYAP2	-1.63515	0.52377	-3.12189	0.00179697	0.0103656	0.293645	0.564876	0.489839	0.260356	0.444792	1.54945	0.0844648	0.175	0.331365	0.191155	0.0678928	0.353328
ENSGALG00000004974	PPARG	1.81882	0.145119	12.5333	4.90889e-36	6.88799e-33	22.0977	18.1929	14.2246	14.5084	17.0744	15.0449	50.746	63.3184	52.9556	61.6177	48.1831	48.512
ENSGALG00000004980	KCNMA1	1.06879	0.14349	7.44855	9.43718e-14	9.74867e-12	2.22457	2.33933	2.63048	1.49421	1.95951	1.79572	4.6985	2.91955	4.42088	4.46744	4.46927	4.10858
ENSGALG00000005005	MIEF2	-1.01066	0.28477	-3.54903	0.000386654	0.002962	8.87871	9.78464	10.5426	8.59818	10.9785	24.9489	4.29982	4.39462	11.0651	4.67983	4.35932	4.49645
ENSGALG00000005011	SHC4	-1.46934	0.534963	-2.74662	0.00602134	0.0263706	4.91645	8.31355	8.89968	7.52881	6.99248	34.23	1.91945	2.7823	12.0478	1.98546	1.97511	2.4854
ENSGALG00000005043	-	1.41548	0.231379	6.11757	9.50123e-10	4.09161e-08	1.76098	1.79833	1.82819	1.12395	1.43993	1.23342	4.38278	4.96594	2.76647	3.28614	3.86482	4.67203
ENSGALG00000005077	F8	1.04419	0.204454	5.1072	3.26971e-07	7.28146e-06	0.374472	0.46789	0.853306	0.421504	0.571336	0.863705	0.91562	1.04465	1.10214	0.916558	1.24951	1.2461
ENSGALG00000005086	PLAU	-1.6532	0.369717	-4.47153	7.76629e-06	0.000110955	17.2535	11.5582	9.37068	6.09536	6.17414	4.46021	3.03185	2.67823	1.88295	4.9073	1.59619	1.70359
ENSGALG00000005171	AP1S3	-1.62167	0.23062	-7.03176	2.03943e-12	1.55384e-10	12.0972	16.4535	12.5127	13.4452	16.2874	20.6658	2.1653	5.13296	7.14337	3.87642	2.75186	3.87991
ENSGALG00000005204	GSTT1L	1.89379	0.322399	5.87404	4.25292e-09	1.59845e-07	8.57389	5.95059	7.08889	10.5296	2.88121	7.32795	26.0097	31.9323	26.2514	32.9316	10.7442	15.6877
ENSGALG00000005318	OVCH1	-2.05529	0.253465	-8.10876	5.11406e-16	7.90004e-14	0.477884	0.771215	0.888257	0.916036	0.759588	0.732742	0.110413	0.136811	0.243871	0.275191	0.069943	0.098109
ENSGALG00000005319	CDH8	2.1971	0.859614	2.55591	0.0105909	0.0405111	0.0545637	0.0350185	0.0900596	0.0356572	0.0533991	0.128242	0.0326821	0.0572181	0.457402	0.935502	0.0642446	0.218826
ENSGALG00000005360	CA4	1.28255	0.277304	4.62506	3.74483e-06	6.02249e-05	3.20339	6.02157	2.06738	3.78363	3.09336	1.99732	7.04636	10.0569	5.06352	7.86792	6.93869	7.71012
ENSGALG00000005408	BCO1	1.2148	0.36674	3.31243	0.000924894	0.00607041	2.17085	2.71696	2.61055	1.63715	1.55136	1.15669	1.9575	6.11985	3.16141	8.35716	2.83849	2.36599
ENSGALG00000005483	CDH13	1.01463	0.209636	4.83997	1.2986e-06	2.41346e-05	23.7622	33.0299	24.5124	15.8911	24.7622	16.3195	49.9841	40.6552	41.4706	25.1189	48.5965	50.6004
ENSGALG00000005502	KCNG4	1.09812	0.405509	2.70801	0.0067688	0.0288029	0.667974	1.45724	0.85999	0.901158	0.620862	0.837725	1.01762	3.54351	1.30233	1.00635	0.758437	2.64095
ENSGALG00000005551	DKK3	1.35104	0.22807	5.92379	3.14612e-09	1.20396e-07	61.518	82.4867	87.1929	44.6329	51.2532	81.4706	134.58	242.357	184.983	142.87	103.223	132.935
ENSGALG00000005609	OGFR	-1.12024	0.284279	-3.94065	8.12607e-05	0.000813476	8.25974	7.15338	10.574	8.44561	13.3017	26.6494	4.07437	4.09775	8.3978	3.57389	4.57072	5.17095
ENSGALG00000005628	COL9A3	-1.18799	0.456071	-2.60483	0.00919187	0.0364	0.473037	0.351019	2.1519	0.517389	0.54833	0.671584	0.26629	0.0674529	0.937791	0.111592	0.229859	0.266369
ENSGALG00000005648	SESN2	-1.07652	0.186581	-5.76975	7.93909e-09	2.75626e-07	3.31772	4.01822	3.26144	3.67884	3.27465	3.98687	1.12041	1.5247	1.41353	2.42493	1.10625	1.51901
ENSGALG00000005649	TMEM150B	1.07269	0.155583	6.89464	5.40001e-12	3.86507e-10	5.52709	6.50275	5.83414	7.52386	6.11724	6.37603	13.4784	11.7853	9.67519	9.64507	15.0759	12.6953
ENSGALG00000005675	PTTG1IP	-1.35728	0.272027	-4.98952	6.05287e-07	1.23537e-05	65.4018	70.5409	91.0497	67.6088	77.7838	164.718	20.2751	31.9816	60.992	28.6638	22.0255	25.8931
ENSGALG00000005678	FLNB	1.08265	0.160086	6.76292	1.35238e-11	8.62554e-10	65.4615	77.9214	60.152	62.104	74.6894	101.647	150.539	162.956	127.809	94.7908	167.406	141.333
ENSGALG00000005747	LOC101748744	1.19774	0.46637	2.56821	0.0102226	0.0394879	0.441321	0.106904	0.477492	0.246176	0.176529	0.814257	0.937613	0.285419	0.711055	0.224292	0.554565	0.563893
ENSGALG00000005752	ABCA4	-1.55891	0.558202	-2.79274	0.00522644	0.0236519	0.304043	0.287187	0.477702	0.378685	0.621931	0.719031	0.109939	0.0538468	0.509431	0.0660285	0.0728918	0.0725319
ENSGALG00000005774	NKAIN4	-1.13439	0.330538	-3.43195	0.00059926	0.00427738	23.1983	27.9799	33.9193	24.6226	25.761	67.1446	10.0205	10.9907	33.7155	10.2043	9.87351	11.7529
ENSGALG00000005790	DEPTOR	1.01778	0.251311	4.04988	5.12432e-05	0.000547136	5.85395	5.59349	5.39348	5.59668	4.79288	5.36969	12.5587	14.3646	10.0656	4.37828	8.52606	13.7976
ENSGALG00000005808	KREMEN1	1.04853	0.234066	4.47964	7.47695e-06	0.00010777	1.26129	1.95489	2.48749	2.39838	2.89101	2.02835	4.47186	3.09928	2.47832	4.0653	4.19013	4.34891
ENSGALG00000005823	HDLBP	1.1151	0.134136	8.31324	9.31263e-17	1.5839e-14	76.3637	92.4088	94.1203	91.5511	104.4	97.4661	185.317	203.543	156.308	133.756	208.564	191.143
ENSGALG00000005845	SLC7A5	1.49908	0.22237	6.74139	1.56876e-11	9.81965e-10	20.6417	21.099	19.7728	27.6284	20.1425	17.2406	40.2036	69.0851	32.6834	67.1592	59.5775	56.9903
ENSGALG00000005846	MPDZ	-1.08508	0.203009	-5.345	9.04161e-08	2.38251e-06	14.9219	17.6931	17.2205	17.1192	20.5859	35.5054	6.47111	7.60255	13.9782	7.02737	7.56629	9.12121
ENSGALG00000005852	-	-2.08904	0.577937	-3.61465	0.000300756	0.00240296	1.64964	2.62622	3.35128	2.4803	4.3162	10.6856	0.433881	0.140385	2.99737	0.573363	0.390635	0.437463
ENSGALG00000005903	NRIP2	1.58279	0.407482	3.88431	0.00010262	0.000987377	0.0642001	0.123786	0.134346	0.0684284	0.098551	0.0469627	0.192052	0.133134	0.395847	0.204315	0.181774	0.301869
ENSGALG00000005923	NPY4R	-2.12712	0.559094	-3.80458	0.000142045	0.0013084	0.242907	0.350947	0.167009	0.0336469	0.18184	0.222852	0.0155081	0.0634185	0.100166	0.0387954	0.0592979	0.0593536
ENSGALG00000005981	GDF2	1.60283	0.560155	2.8614	0.00421774	0.0201299	0.0960098	0.074467	0.0785438	0.0159924	0.0948145	0.0351768	0.20249	0.0605449	0.305045	0.200986	0.239301	0.0925439
ENSGALG00000005985	-	2.0106	0.275644	7.2942	3.00443e-13	2.82618e-11	1.05642	0.547322	0.831785	0.53018	0.804161	1.05005	2.68793	1.38422	2.59502	2.46209	2.2271	3.98078
ENSGALG00000006009	PODXL2	-1.60373	0.189853	-8.4472	2.98375e-17	5.46092e-15	36.0794	33.9771	38.7383	39.7223	39.0514	58.9033	11.1805	14.5581	20.2427	8.44732	9.6824	10.2252
ENSGALG00000006031	BRDT	-1.34724	0.384097	-3.50754	0.000452262	0.00336955	15.4646	16.8855	20.1055	15.0212	22.951	49.9037	5.03866	5.76639	24.4725	3.41084	4.28267	6.30563
ENSGALG00000006087	GPC3	-2.07515	0.748283	-2.77322	0.00555047	0.0247442	0.611783	0.264952	0.586147	0.0863272	0.696657	2.10387	0.224259	0.304575	0.621991	0.0395282	0.168281	0.315064
ENSGALG00000006106	TNFRSF6B	1.91948	0.340314	5.64032	1.69733e-08	5.49607e-07	3.15799	3.41119	3.42133	0.940701	5.48852	2.71861	9.71837	13.2229	10.0314	4.38506	14.5935	11.626
ENSGALG00000006137	ARHGAP22	-1.27465	0.258654	-4.928	8.30737e-07	1.62273e-05	2.54948	2.92519	3.27557	3.41356	4.14529	5.79515	1.09072	1.06888	2.56265	1.52141	0.927695	1.24704
ENSGALG00000006175	DPEP1	2.492	0.759439	3.28137	0.00103302	0.00663896	0.0302639	0.0291507	0	0.0270811	0.0318971	0	0.174151	0.0937992	0.0893711	0.0620804	0.0328935	0.337286
ENSGALG00000006216	MYOD1	-2.29614	0.933405	-2.45996	0.0138951	0.0495272	0.294857	0.405948	0.350737	0.432137	0.58032	2.69209	0.0524807	0.0668886	0.708741	0.0332796	0.034835	0.0329533
ENSGALG00000006221	KIF1A	1.06789	0.162738	6.56203	5.30816e-11	2.89252e-09	0.374644	0.493246	0.315516	0.463294	0.386925	0.389244	0.796523	0.784535	0.646415	0.627178	0.771594	0.850345
ENSGALG00000006272	ECE2	1.02433	0.236425	4.33255	1.47391e-05	0.000191348	0.818563	1.05135	0.968022	0.771176	1.10367	0.861638	2.34616	1.96457	1.20708	1.23756	1.43876	1.75224
ENSGALG00000006325	NTN4L	1.42954	0.267699	5.34011	9.28917e-08	2.43252e-06	0.790015	0.701961	0.668491	0.313149	0.411918	0.676117	1.24165	1.74864	0.972983	1.54058	1.81506	1.28439
ENSGALG00000006329	IL9	-1.51028	0.521445	-2.89633	0.00377555	0.0185343	2.55698	3.61509	11.1844	7.7429	4.31644	17.7326	0.51729	0.885872	8.48383	2.12051	0.754181	1.18599
ENSGALG00000006343	ACTA2	1.33537	0.273152	4.88874	1.01484e-06	1.94624e-05	644.499	509.353	553.761	559.265	645.808	456.463	1783.74	742.35	934.764	689.498	1861.31	1638.88
ENSGALG00000006436	AQP12A	3.27737	0.783516	4.1829	2.87817e-05	0.000335614	0.0358838	0.0352257	0.190622	0.063273	0.0373663	0	0.148643	0.227768	0.467267	1.49947	0.228917	0.47012
ENSGALG00000006440	GAL3ST4	2.31189	0.558692	4.13805	3.50273e-05	0.000397165	0.913046	2.26536	0.414734	6.64748	1.12242	1.66279	8.39113	17.0328	6.04659	14.2036	4.34396	6.66003
ENSGALG00000006490	SCN3B	-3.1114	0.351616	-8.84885	8.8424e-19	1.99242e-16	7.77028	6.28697	6.51014	6.52159	5.21987	5.96593	0.276515	0.290769	1.26772	0.565578	1.24237	1.11089
ENSGALG00000006491	ANKRD1	2.56561	0.584068	4.39265	1.11976e-05	0.000151564	0.101119	0.097728	0	0.0187846	0.0783073	0.166141	0.807049	0.515942	0.233198	0.118349	0.522525	0.304336
ENSGALG00000006515	BSX	-2.70974	0.830539	-3.26262	0.00110386	0.00704046	0.304353	0.74677	1.15823	0.412097	0.893903	6.91365	0.125535	0.157566	0.379842	0.157034	0.166696	0.387845
ENSGALG00000006544	-	-1.08059	0.368886	-2.92934	0.00339683	0.0171258	0.275161	0.140608	0	0.366096	0.709746	0.274691	0	0	0.42498	0	0	0.13929
ENSGALG00000006567	UBASH3B	1.47053	0.134719	10.9155	9.71614e-28	5.64139e-25	3.02204	3.30969	3.26114	3.27902	2.77339	2.38156	6.40543	8.61283	7.98121	7.71577	8.03941	8.09978
ENSGALG00000006576	GRM3	1.54956	0.492792	3.14445	0.001664	0.00974554	0.0870172	0.113267	0.0935396	0.0490479	0.0586552	0	0.160052	0.285087	0.117487	0.252051	0.175851	0.13018
ENSGALG00000006598	SORL1	2.57666	0.215413	11.9615	5.6539e-33	7.3231e-30	2.73938	3.06241	3.05547	4.09165	3.22607	2.28546	19.0245	23.7766	11.098	14.318	14.9351	19.1587
ENSGALG00000006633	TMEM243	-1.34397	0.25454	-5.28001	1.29179e-07	3.26594e-06	13.2897	11.4033	8.74338	7.94119	11.5713	5.83977	2.46955	3.56204	3.60615	5.6007	3.0329	4.3573
ENSGALG00000006637	XKRX	1.57212	0.314198	5.0036	5.6269e-07	1.16682e-05	2.19793	1.88116	1.30772	1.21305	1.3431	1.63717	7.80838	2.55717	2.65815	3.5785	6.14058	4.94121
ENSGALG00000006647	DUSP8	1.45256	0.347977	4.17431	2.98896e-05	0.000346373	3.99534	2.86619	1.91546	1.51575	3.27072	3.49517	10.0057	5.27797	4.80863	2.80742	11.6219	8.55082
ENSGALG00000006662	BPIFB3	7.827	1.16298	6.73011	1.69538e-11	1.04952e-09	0	0	0	0	0	0	0.804816	0	0.11533	0.403558	0.428714	0.614596
ENSGALG00000006705	MYOF	1.23654	0.228046	5.42233	5.88266e-08	1.62915e-06	2.73144	2.94051	3.55303	1.04735	2.61298	2.53009	4.60464	5.82843	6.96845	4.25214	6.87559	6.22734
ENSGALG00000006707	NOX1	1.41927	0.478576	2.96561	0.00302082	0.0156266	0.387217	0.131455	0.217776	0.14644	0.259966	0.22572	1.09589	0.472055	0.540195	0.320413	1.1645	0.402764
ENSGALG00000006728	SLC5A1	-1.37502	0.444554	-3.09303	0.00198125	0.0112476	1.0346	0.616092	0.524153	0.639173	0.840581	0.234884	0.264528	0.172079	0.20192	0.384469	0.347618	0.124229
ENSGALG00000006751	THY1	1.58648	0.205744	7.71096	1.24878e-14	1.5461e-12	51.5315	74.1958	74.8242	46.6924	67.725	42.5396	190.044	177.543	163.577	105.344	195.365	142.785
ENSGALG00000006776	KLHDC8B	1.1544	0.311293	3.70841	0.000208568	0.00178086	5.99394	7.58768	10.3285	16.7577	8.73171	3.89657	15.3441	11.6039	19.3536	22.6781	28.7845	15.3547
ENSGALG00000006796	SRPX2	1.0493	0.222728	4.71114	2.46335e-06	4.22812e-05	14.5142	10.1924	11.4282	18.3012	11.3211	10.7284	24.4573	29.0865	14.8645	29.6652	23.573	27.6087
ENSGALG00000006809	POU2AF1	1.26253	0.429885	2.9369	0.00331511	0.0168132	0.0530968	0.0861368	0.147961	0.179727	0.324368	0.186101	0.338865	0.244127	0.408	0.345191	0.396174	0.353092
ENSGALG00000006821	TNMD	1.92575	0.364608	5.28171	1.27984e-07	3.24548e-06	4.9281	2.69341	2.84685	5.08731	3.70776	3.15249	18.4709	5.33291	9.18617	5.33318	17.5001	20.7123
ENSGALG00000006851	PCDH11X	1.19327	0.274882	4.34102	1.41822e-05	0.000185981	1.20043	1.26693	0.853429	0.67101	0.830904	1.74891	2.08908	1.87148	3.21353	1.22122	2.8427	2.24612
ENSGALG00000006854	NEURL2	1.76368	0.450409	3.91573	9.01315e-05	0.000884918	0.553337	0.414533	0.135361	0.388066	0.668454	0.329256	0.886486	2.37035	0.788924	1.02072	0.99031	0.695082
ENSGALG00000006876	CTSA	2.39083	0.32229	7.41825	1.18681e-13	1.1755e-11	358.468	284.734	177.356	348.335	206.371	182.356	1163.73	1959.21	846.128	1732.55	617.986	1081.45
ENSGALG00000006882	ST8SIA2	-1.1906	0.260403	-4.57214	4.82773e-06	7.47831e-05	13.9181	12.9437	9.487	16.8258	10.3038	10.5717	4.06324	4.45531	7.08213	7.69746	3.28657	3.15838
ENSGALG00000006942	PIK3IP1	-1.40444	0.320034	-4.3884	1.14186e-05	0.000154307	31.8463	31.0657	37.3649	27.978	31.8152	62.5977	7.96164	8.61735	24.7557	18.7067	6.34654	6.30494
ENSGALG00000006973	SH2D6	-1.41581	0.563097	-2.51433	0.011926	0.04429	2.75336	3.25153	5.62313	3.57268	4.03062	21.0574	0.964746	1.24899	8.13211	1.56066	0.990821	1.36708
ENSGALG00000006992	MMP9	1.44752	0.359212	4.0297	5.58481e-05	0.000591057	127.597	261.587	120.532	209.285	113.463	55.7115	331.036	558.921	176.869	419.849	336.262	392.999
ENSGALG00000007042	CCDC40	-1.10283	0.408231	-2.70148	0.00690324	0.0292346	0.870488	0.955849	1.23988	1.44687	1.07812	3.60205	0.391977	0.642409	1.43811	0.877594	0.190248	0.58982
ENSGALG00000007257	TEKT5	1.12411	0.390582	2.87804	0.00400153	0.0193115	0.144866	0.0803849	0.0645687	0.0716903	0.0834678	0.0396826	0.226743	0.17296	0.224012	0.142604	0.103611	0.121579
ENSGALG00000007284	SYP	-1.09125	0.427202	-2.5544	0.0106371	0.040653	1.48457	1.87473	2.02374	1.69534	2.96165	6.93851	1.37091	1.15188	1.73827	0.716143	2.12751	0.925013
ENSGALG00000007409	SCN4B	1.06602	0.312908	3.4068	0.000657285	0.0045999	1.14955	2.42332	2.16633	1.20701	1.31092	2.92687	1.76153	3.81241	4.31866	4.58428	2.02665	3.24236
ENSGALG00000007412	MPZL2	-1.34536	0.3343	-4.02439	5.7122e-05	0.000602644	11.3237	11.5562	15.2203	11.6542	13.1498	28.4624	2.77048	4.23639	12.8261	5.67384	3.96282	3.45669
ENSGALG00000007419	MASP1	1.71216	0.617167	2.77423	0.00553326	0.0247001	0.204113	0.130277	0.0838391	0.00984705	0.0698457	0.427838	0.334823	0.483724	0.682574	0.500024	0.129872	0.508974
ENSGALG00000007441	MAP6	-1.34057	0.328373	-4.08245	4.4564e-05	0.000487886	0.853867	1.16485	1.03979	1.21035	0.751271	2.55263	0.351757	0.299866	0.762523	0.534546	0.2698	0.458019
ENSGALG00000007476	VAMP7	-1.25138	0.288477	-4.33789	1.43856e-05	0.000188063	55.4137	56.3869	72.0705	65.1309	81.8715	155.458	20.6623	27.302	66.01	25.8429	24.033	23.9544
ENSGALG00000007513	FAM207A	-1.00876	0.238929	-4.222	2.42145e-05	0.000288552	28.7886	36.954	35.6311	32.2383	40.8022	80.7819	12.7965	16.8453	32.8587	18.8623	15.9872	15.6456
ENSGALG00000007543	APCDD1L	1.13335	0.21124	5.36522	8.08526e-08	2.15411e-06	6.1286	5.71539	8.54294	6.43451	6.46211	5.9278	19.2179	10.5232	14.5993	6.49005	16.52	10.7021
ENSGALG00000007582	DPYSL3	1.10587	0.174597	6.33388	2.3907e-10	1.15343e-08	12.4207	10.5556	17.3311	11.631	16.724	17.0086	27.2367	23.403	26.6839	20.2481	39.2131	32.1637
ENSGALG00000007620	GFRA3	5.85171	0.718872	8.14013	3.94851e-16	6.21355e-14	0	0	0.0397944	0	0	0.0729188	0.719013	1.27775	1.96758	0.634155	1.45933	1.47193
ENSGALG00000007669	EGR1	1.07327	0.308843	3.47514	0.000510582	0.0037298	10.9168	12.4071	16.9022	6.6323	14.6528	11.7818	33.0304	29.1141	9.87535	13.1159	24.3593	27.1161
ENSGALG00000007675	CXCR5	2.23651	0.531905	4.20472	2.61402e-05	0.000309093	0.0217757	0.0417381	0.04607	0.0381185	0.0449186	0.0422566	0.156809	0.136395	0.172198	0.286802	0.136986	0.130995
ENSGALG00000007701	B3GNT7	-1.80513	0.345059	-5.23137	1.68255e-07	4.11785e-06	19.3327	20.1268	21.8558	24.2468	15.4668	33.4385	2.98554	4.40832	16.7519	5.7011	2.52242	3.86318
ENSGALG00000007768	AURKB	-1.00884	0.350967	-2.87446	0.00404715	0.0194703	44.6709	59.1268	62.4596	61.5587	75.1059	153.234	21.0768	31.7859	83.6659	16.1982	29.1216	24.2145
ENSGALG00000007806	FGF16	-1.53819	0.437297	-3.5175	0.00043563	0.00325572	3.63155	6.53993	5.1797	3.13571	7.0449	12.9348	0.830973	2.76593	6.69412	0.674205	1.09281	2.11104
ENSGALG00000007867	SLC9A5	1.7354	0.329829	5.26151	1.42874e-07	3.54302e-06	0.788684	0.730993	0.262919	0.975195	0.59856	0.463001	2.42656	2.24085	1.01104	3.51413	1.4016	1.29141
ENSGALG00000007945	CRYAB	-1.08761	0.249802	-4.35388	1.33749e-05	0.000177189	1.9524	1.62683	1.50981	1.96312	1.96227	3.32893	1.1201	0.684324	0.971607	0.736875	1.00039	0.783595
ENSGALG00000007955	SLC16A5	1.31562	0.424517	3.0991	0.00194107	0.0110493	0.370179	0.414945	0.478253	0.170804	0.203803	0.248741	1.01398	0.81029	0.509717	1.25889	1.14379	0.654114
ENSGALG00000007964	GATSL3	-1.17761	0.402038	-2.92911	0.00339937	0.0171271	29.3632	47.5061	39.4843	31.3799	50.4596	158.64	15.6387	21.1443	53.1499	13.4263	14.4937	19.7907
ENSGALG00000007972	TRPC5	-2.05124	0.802291	-2.55673	0.0105662	0.0404716	0.238701	0.296146	0.714062	0.530306	0.890208	4.16296	0.0614136	0.097557	1.37106	0.0769962	0.143544	0.220574
ENSGALG00000007976	-	-1.73659	0.651559	-2.66529	0.00769225	0.031808	1.99745	1.40697	2.78433	1.01139	1.56932	12.1854	0.327144	0.229682	3.6812	0.473448	0.468015	0.555324
ENSGALG00000007993	DCX	-1.18977	0.479079	-2.48345	0.0130118	0.0472591	2.14156	1.73359	1.70418	1.16927	1.6527	6.75466	0.8027	0.998252	2.28418	0.606252	0.498282	0.874086
ENSGALG00000008043	CORO2B	-1.22748	0.346529	-3.54223	0.000396764	0.00301612	9.04077	11.6291	12.8466	11.964	15.598	39.1549	4.79279	5.09974	13.86	4.16552	4.91817	5.24074
ENSGALG00000008060	PRKAR2B	1.13159	0.233097	4.85457	1.20648e-06	2.25219e-05	2.10715	3.08642	2.30435	1.56219	2.07329	1.64652	5.89814	3.11959	4.19931	3.49691	5.62732	4.70276
ENSGALG00000008085	NEFH	-1.82101	0.629076	-2.89474	0.00379473	0.0185959	0.103	0.208557	0.196825	0.376019	0.158377	0.928357	0.0900036	0.065202	0.298277	0.116653	0.0324471	0.0409565
ENSGALG00000008178	CYP2AB2	1.00904	0.269196	3.74835	0.000178	0.00156878	1.3712	1.32907	1.49051	1.93299	1.44757	0.75487	4.23451	2.52908	2.36228	3.38152	2.4727	2.69634
ENSGALG00000008206	TESC	-1.57024	0.292302	-5.37198	7.78768e-08	2.08141e-06	14.1639	13.5283	15.2392	17.7074	15.8766	30.8757	2.43466	3.22327	9.2695	6.83132	3.89287	4.93412
ENSGALG00000008263	CNTN4	2.7954	0.315919	8.84845	8.87467e-19	1.99242e-16	0.906564	0.762721	0.915631	1.56921	0.848719	2.5583	8.25994	10.6676	10.5852	6.83101	3.70567	7.0892
ENSGALG00000008267	IL5RA	2.38712	0.738052	3.23436	0.00121916	0.00764267	0	0.0429942	0.0282283	0	0.0170098	0.0469439	0.0257287	0.0573946	0	0	0	0
ENSGALG00000008308	BHLHE40	1.0074	0.179184	5.62215	1.88592e-08	6.06013e-07	11.0709	11.1284	15.2881	12.8321	11.882	13.5364	27.635	22.9946	17.9295	18.8738	31.5812	17.9422
ENSGALG00000008309	-	-1.57228	0.390599	-4.02531	5.68992e-05	0.000600786	0.618365	0.295376	0.282894	0.694007	1.25652	0.739653	0.141226	0	0.109427	0.182112	0.132077	0.205342
ENSGALG00000008418	LARGE2	1.14324	0.207718	5.50379	3.71717e-08	1.10975e-06	11.7359	14.3175	8.2375	15.4068	13.9537	15.4796	27.8565	37.8281	17.248	20.6848	25.8667	27.9674
ENSGALG00000008490	TRH	1.36002	0.531473	2.55897	0.0104983	0.0402729	0.0468192	0.0453701	0.0159418	0.0776935	0	0.113305	0.175147	0.196211	0.248084	0.402491	0.148959	0.346488
ENSGALG00000008518	GSL	1.07587	0.233235	4.61281	3.9727e-06	6.31655e-05	24.6469	22.9218	18.1326	29.2829	26.1046	19.1511	35.6414	54.3151	32.3045	70.6937	35.4014	38.5962
ENSGALG00000008635	LOC417741	-2.19674	0.833665	-2.63504	0.00841264	0.0340211	2.81783	0.398781	1.25285	0.67129	3.79455	10.5725	0.325304	0.039652	2.53565	0.436304	0.452631	0.222721
ENSGALG00000008646	HRG	3.39363	0.770308	4.40555	1.05516e-05	0.000144094	0.106412	0	0	0.106039	0.0356823	0	0.189792	0.583756	0.333438	0.375583	0.278025	0.140152
ENSGALG00000008661	CYR61	1.72172	0.396469	4.34264	1.40782e-05	0.000184906	42.7407	30.5508	27.9486	18.1347	47.2674	29.074	193.415	89.441	46.105	34.6915	147.601	116.312
ENSGALG00000008691	SNX5	-1.38424	0.275645	-5.02183	5.11818e-07	1.07189e-05	57.0837	56.3731	74.4559	65.5017	88.543	142.471	15.7055	22.556	58.2936	25.7455	21.1303	22.9558
ENSGALG00000008702	OVOL3	-1.56007	0.333547	-4.6772	2.90817e-06	4.87241e-05	0.497654	1.51252	0.544157	0.369299	0.893536	1.49406	0.209828	0.50266	0.654079	0	0	0.25531
ENSGALG00000008733	LPAR3	1.05551	0.282519	3.73608	0.000186912	0.00163238	0.438504	0.463933	0.479523	0.940516	0.839175	0.724496	1.04577	0.962341	0.777529	1.18926	1.39231	1.41923
ENSGALG00000008747	ITGA8	1.32557	0.250667	5.28815	1.23562e-07	3.14756e-06	20.1747	21.4822	30.4835	13.0636	23.8949	12.9289	51.5172	42.1328	48.7086	25.3373	61.3702	52.1326
ENSGALG00000008815	LRRN4	2.91886	0.208114	14.0253	1.09147e-44	3.67563e-41	20.3522	20.2968	17.7825	16.7989	13.6344	12.7814	116.349	169.968	82.1792	110.723	91.856	122.23
ENSGALG00000008818	IDH1	1.23335	0.16058	7.6806	1.5834e-14	1.93197e-12	34.4843	36.7379	34.8398	29.3608	33.0015	27.4582	62.5382	105.112	66.0074	60.9477	64.2393	60.8513
ENSGALG00000008859	WDR31	1.07893	0.218702	4.93332	8.08423e-07	1.59021e-05	1.27079	2.06587	2.01912	1.14654	1.10957	1.48549	3.0015	3.51455	3.99021	2.97433	1.8478	3.33076
ENSGALG00000008888	IL1RAPL2	-1.86453	0.134401	-13.8729	9.24717e-44	2.59506e-40	11.696	11.7306	13.815	11.5764	12.3749	8.64853	2.62719	2.82203	3.21267	3.24963	2.70913	3.10011
ENSGALG00000008901	PTGFR	-1.56668	0.352437	-4.44529	8.77718e-06	0.000123158	3.99537	3.71631	6.62152	2.45665	2.84356	2.17174	1.42996	0.609759	1.82445	1.05311	0.899026	0.576958
ENSGALG00000008914	NRAP	-1.86844	0.468639	-3.98695	6.69284e-05	0.000687578	0.679702	0.580722	0.204546	0.897142	0.174047	0.303382	0.158441	0.109463	0.103471	0.241844	0.0677309	0.084408
ENSGALG00000008918	LAMP5	1.64731	0.191154	8.61769	6.83179e-18	1.42017e-15	3.92875	6.7132	6.44854	6.75154	6.09967	4.68685	17.119	16.1084	17.44	10.8489	22.5525	16.5813
ENSGALG00000008926	CADPS2	-1.10192	0.403032	-2.73407	0.00625573	0.0271294	1.96281	1.63696	1.45629	1.39124	2.24918	6.59798	0.8125	0.577712	2.30363	0.522823	0.812289	1.35778
ENSGALG00000008936	ENTPD8L	1.68002	0.192395	8.73213	2.49922e-18	5.39512e-16	5.88947	5.71347	7.2928	6.88259	6.32118	8.67904	24.172	18.4243	13.872	18.4288	27.9197	17.5275
ENSGALG00000008945	NEXN	1.93715	0.182786	10.5979	3.04729e-26	1.42528e-23	4.13034	4.35913	2.48018	5.01946	2.93351	2.63315	14.0244	15.664	16.0045	13.1753	12.8354	12.4606
ENSGALG00000008960	KCNK12	-1.10908	0.382826	-2.89707	0.00376661	0.0185066	2.03036	2.06596	3.32975	2.92482	2.12414	9.71032	0.919296	1.44803	2.42018	1.49321	1.23198	1.53026
ENSGALG00000008969	EPCAM	-2.02531	0.46801	-4.32749	1.50818e-05	0.000194894	37.7738	48.9203	66.6107	59.7255	68.1251	148.308	5.22041	10.0778	51.4263	12.7814	8.26241	9.48231
ENSGALG00000008980	VWA2	-2.53193	0.454973	-5.565	2.62158e-08	8.06987e-07	1.88674	1.96133	3.65143	1.55882	3.25052	9.14716	0.239862	0.381849	1.06406	0.434395	0.420933	0.969424
ENSGALG00000009006	STEAP1	1.5784	0.381969	4.13227	3.59195e-05	0.000405046	0.539183	0.0824191	0.354307	0.237469	0.230536	0.379148	0.676432	1.00338	1.26759	0.488012	0.889177	1.12449
ENSGALG00000009012	ZNF385B	-1.71579	0.62777	-2.73316	0.00627305	0.0271601	1.09074	2.25366	2.01009	1.65916	2.6063	7.49483	0.42991	0.271121	3.19025	0.375148	0.606125	0.331302
ENSGALG00000009042	ISM1	2.00176	0.639705	3.12919	0.00175289	0.0101601	0.545135	0.207684	0.074617	0.72469	0.289525	0.0698935	1.88577	1.28975	0.256842	1.55327	0.58266	1.26376
ENSGALG00000009078	GALNT14	-1.0904	0.354711	-3.07405	0.00211177	0.0118132	0.940685	1.5303	0.888445	1.16088	1.7816	3.80528	0.537554	0.611546	1.50742	0.328737	0.373077	0.506899
ENSGALG00000009241	SFRP2	-1.10291	0.244731	-4.50661	6.58705e-06	9.77205e-05	9.37154	9.61282	9.05886	9.05105	10.7682	19.1239	3.19138	4.8841	8.92718	4.15951	2.6129	3.54412
ENSGALG00000009254	ENO4	-1.32367	0.278941	-4.74535	2.08144e-06	3.64317e-05	0.315843	0.352109	0.219937	0.432286	0.295212	0.410279	0.106748	0.0947446	0.20074	0.21635	0.134412	0.116455
ENSGALG00000009256	LEFTY1	1.82873	0.713689	2.56237	0.0103962	0.0399934	0	0	0.0498078	0	0	0	0.0950192	0.0999802	0.0235773	0.141146	0.073715	0
ENSGALG00000009360	CAPN2	1.59946	0.272951	5.85987	4.63218e-09	1.72012e-07	1.7564	3.48501	1.78898	1.43262	1.25039	1.45424	4.90283	7.04848	3.54705	6.88185	4.13647	4.13024
ENSGALG00000009382	CAPN8	-2.95763	0.97242	-3.04152	0.0023539	0.0128685	0.070319	0.0792061	0.0121567	0.00991662	0.0942652	0.684426	0	0.0245159	0.0580237	0.0113497	0.035133	0.0114956
ENSGALG00000009403	GRK5	1.63933	0.344983	4.75193	2.01482e-06	3.53024e-05	0.577507	0.912809	0.430654	0.321684	0.635624	0.359561	1.52351	2.00455	1.24685	0.945018	0.824094	2.02584
ENSGALG00000009415	SMOC1	1.16665	0.416023	2.8043	0.00504254	0.0230285	3.38996	4.7682	3.02227	0.641936	1.70265	2.68436	9.13788	4.39449	7.528	2.39579	3.51949	6.24679
ENSGALG00000009507	PLEKHH1	1.25485	0.318706	3.93733	8.23917e-05	0.000824308	8.97481	6.32641	3.64688	12.0142	6.43371	3.78006	16.0314	20.8189	10.2472	23.7299	9.37469	15.5663
ENSGALG00000009562	PLEK2	1.35069	0.308887	4.37277	1.22681e-05	0.000164336	1.09086	0.964388	1.3145	0.424842	0.794645	0.984006	1.10988	1.79138	2.02778	2.8425	2.54907	2.77981
ENSGALG00000009567	TLL1	-1.56393	0.201361	-7.76682	8.04804e-15	1.02661e-12	5.96793	5.88369	5.685	4.72628	4.58936	2.68302	1.60699	1.20627	1.75013	1.52407	1.47715	1.62031
ENSGALG00000009594	RARRES1	1.04967	0.172638	6.08014	1.20078e-09	5.04209e-08	42.2331	49.8771	47.0062	35.5556	44.9339	31.948	72.0788	101.123	80.8652	56.5079	76.3907	84.1499
ENSGALG00000009603	LOC417800	-1.14614	0.340586	-3.36521	0.000764862	0.00519933	1.84471	0.402609	0.438198	0.710678	1.14087	1.18224	0.147751	0.141919	0.546059	0.0895256	0.285277	0.18335
ENSGALG00000009624	FSIP1	-1.12316	0.424547	-2.64555	0.00815571	0.0332347	0.864548	0.81222	0.304465	0.971818	0.572456	1.26753	0.558518	0.0623291	0.337408	0.356355	0.29769	0.456764
ENSGALG00000009626	THBS1	1.77695	0.322627	5.50776	3.63431e-08	1.08887e-06	40.7672	34.3883	38.9659	32.1124	38.5986	22.5408	157.864	63.9935	62.4704	52.3374	177.347	124.434
ENSGALG00000009641	COL1A2	1.41659	0.224203	6.31832	2.64418e-10	1.26485e-08	741.541	680.217	875.476	664.378	888.577	600.088	2684.33	1210.24	1608.03	1147.86	2337.42	2039.16
ENSGALG00000009668	HPF1	-1.15076	0.144355	-7.97171	1.56488e-15	2.23301e-13	138.998	144.459	154.563	167.394	187.836	215.41	51.1841	70.0332	96.5035	76.5529	55.9289	57.7489
ENSGALG00000009687	KCNK2	-2.45623	0.287211	-8.552	1.20976e-17	2.34137e-15	58.6805	63.802	64.5672	55.1375	33.3599	40.2113	4.90446	8.66002	12.1117	15.7992	6.31328	5.8777
ENSGALG00000009689	PON1	1.09438	0.206494	5.2998	1.15928e-07	2.97561e-06	7.79134	8.52376	4.90189	5.5985	4.84117	4.13696	11.8409	13.295	10.1136	12.3019	9.17071	13.7921
ENSGALG00000009693	-	-2.01755	0.399476	-5.05049	4.40672e-07	9.47641e-06	2.41827	2.71218	1.21824	1.21259	2.37909	6.58347	0.761576	0.736632	1.07179	0	0.319381	0.614726
ENSGALG00000009700	PDK4	-1.11815	0.378001	-2.95806	0.00309585	0.0159315	27.2194	28.818	18.924	11.872	12.2903	43.5099	5.27857	10.2506	19.3521	15.3698	5.59565	4.97772
ENSGALG00000009805	PPM1H	-1.53472	0.41172	-3.72759	0.000193317	0.00167528	3.62731	4.85467	4.4912	4.5131	5.46307	14.1737	0.932201	1.82225	4.51997	1.27554	0.910028	1.6416
ENSGALG00000009807	FLVCR1	1.49858	0.274031	5.46865	4.53465e-08	1.30298e-06	5.47176	3.88506	3.95996	3.81545	3.92378	3.29405	15.1061	17.8025	7.60693	4.8093	10.8642	12.5453
ENSGALG00000009844	ACTC1	4.17385	0.545764	7.64772	2.04576e-14	2.47817e-12	2.25556	0.526395	1.35399	0.345743	1.57515	3.36193	16.0196	11.0536	33.5367	5.75721	43.4476	41.3463
ENSGALG00000009845	GJD2	3.03778	0.728827	4.16804	3.07229e-05	0.000354323	0.845585	0.0354082	0.226764	0.030734	0.164331	0.136248	1.78887	0.477505	2.83779	1.22717	1.9219	2.33305
ENSGALG00000009861	RD3	-1.26238	0.387331	-3.25917	0.00111738	0.00710517	0.570415	0.343257	0.608379	0.431444	0.638808	2.04256	0.220486	0.184166	0.434842	0.439327	0.188704	0.264229
ENSGALG00000009864	TRAF5	-1.11505	0.315806	-3.53081	0.000414293	0.00312516	0.737412	0.844341	0.785551	0.905783	0.899323	2.12248	0.336038	0.364152	0.822778	0.454939	0.252893	0.373965
ENSGALG00000009875	HMGA2	-1.227	0.36678	-3.34533	0.000821858	0.00551552	3.68083	3.34823	3.2434	2.53135	3.96948	2.45035	1.3123	2.57805	0.744455	1.83895	1.23564	1.32093
ENSGALG00000009943	FAM117A	-1.02163	0.221534	-4.61161	3.99558e-06	6.34445e-05	23.7986	37.3771	37.0316	31.275	37.6926	68.0608	13.1068	15.8164	31.3797	15.6693	10.3717	14.3692
ENSGALG00000009948	HHIP	-1.59001	0.337023	-4.7178	2.38407e-06	4.113e-05	1.00763	1.17228	0.948764	0.399557	0.779566	0.398576	0.224853	0.223775	0.235976	0.171112	0.324587	0.314635
ENSGALG00000009993	MED8	-1.03475	0.26974	-3.8361	0.000125001	0.00116932	17.1439	27.2931	22.8219	28.249	26.8888	46.8423	6.59842	12.9858	23.5803	12.5344	7.89177	10.5352
ENSGALG00000010001	EGLN3	-1.04691	0.315703	-3.31612	0.000912761	0.00601059	4.90443	6.94495	7.48165	8.39606	7.57786	19.9214	2.13844	3.34104	7.76856	2.16199	3.07154	3.62366
ENSGALG00000010009	TTC29	-1.24496	0.432309	-2.8798	0.00397934	0.0192375	1.02399	0.57218	0.804883	0.523261	0.748876	1.62323	0.247011	0.19654	0.52864	0.129151	0.523573	0.337876
ENSGALG00000010010	RHOQ	1.02993	0.182993	5.62822	1.82075e-08	5.86192e-07	1.77436	2.23319	2.81588	1.79585	2.03293	2.09939	3.36457	4.17911	3.80198	5.29874	3.20444	4.01184
ENSGALG00000010018	CTSEAL	3.23418	0.53388	6.05788	1.37927e-09	5.67826e-08	0.15787	0	0.0412565	0.033609	0.0401615	0.037872	0.566034	0.540895	0.312942	0.818824	0.161096	0.234992
ENSGALG00000010068	KCNK17	-1.71756	0.420322	-4.0863	4.38302e-05	0.000480477	7.82341	9.16864	13.5921	9.80541	11.18	27.0252	1.99361	2.35091	10.9363	2.79018	2.03932	2.06754
ENSGALG00000010133	PTCH2	-1.0591	0.273716	-3.86934	0.000109131	0.0010417	5.60848	8.85297	10.4062	8.1819	7.47966	5.38744	3.16394	3.38897	3.65212	1.50346	3.1152	5.89054
ENSGALG00000010160	-	1.23196	0.201333	6.11902	9.41522e-10	4.07505e-08	2.90429	3.65822	3.68063	2.65676	3.13506	2.38461	8.31097	7.42819	5.92288	4.45089	5.75853	5.18912
ENSGALG00000010166	VLDLR	-1.54341	0.213056	-7.24411	4.35275e-13	3.83764e-11	231.238	180.022	242.745	184.236	238.895	322.538	53.8688	83.1217	135.951	58.7146	48.6238	63.4566
ENSGALG00000010180	GLIS3	3.25009	0.325036	9.99916	1.53696e-23	5.62595e-21	0.23656	0.157464	0.0595951	0.278423	0.109857	0.11852	0.989014	1.33066	1.42065	1.57234	0.707503	0.898457
ENSGALG00000010233	SYNDIG1L	1.80877	0.257175	7.03324	2.01796e-12	1.54447e-10	0.752611	0.51882	0.974822	0.550564	0.534719	0.714623	2.24601	1.7853	2.43147	1.1392	2.11257	3.16129
ENSGALG00000010237	NPC2	3.06921	0.280848	10.9283	8.4369e-28	5.07359e-25	102.837	105.458	87.7928	135.569	91.6915	96.3421	619.79	1614.33	781.764	516.973	509.492	650.706
ENSGALG00000010269	KCNAB1	1.56073	0.287542	5.42783	5.70438e-08	1.58988e-06	2.977	3.6721	2.29853	5.97434	4.90757	8.58013	9.4161	12.8496	8.77418	13.3963	12.7638	17.2804
ENSGALG00000010303	EPHX1L	2.38469	0.404232	5.89931	3.6503e-09	1.37811e-07	2.29691	2.04817	2.95361	2.76842	2.61833	10.4801	24.015	28.8332	17.4461	21.3179	16.2817	16.4136
ENSGALG00000010312	PLCH1	-1.45733	0.562273	-2.59185	0.00954609	0.0374853	0.708148	0.714911	1.00253	0.915923	1.15937	3.79505	0.242326	0.0931215	1.62632	0.369665	0.29739	0.250289
ENSGALG00000010326	FLVCR2	1.97644	0.229847	8.59892	8.04696e-18	1.63247e-15	2.12469	1.65937	1.83612	2.39822	1.05823	1.69771	6.09681	9.09331	4.36797	6.80335	6.78433	6.43632
ENSGALG00000010343	TSPAN16	3.49417	0.703113	4.96958	6.70992e-07	1.34823e-05	0.324369	0	0.339345	0.139819	0.207469	1.32153	4.98466	0.984934	1.85731	4.32603	6.62363	3.64992
ENSGALG00000010364	AADAC	2.71522	0.328294	8.2707	1.33176e-16	2.24242e-14	2.88514	2.79966	3.0257	4.43769	2.84038	8.03552	22.289	49.4991	12.9412	23.0941	19.7392	27.1321
ENSGALG00000010375	SLC30A2	-1.57783	0.296508	-5.32136	1.02994e-07	2.67214e-06	7.00011	7.28219	8.10517	5.41646	5.98046	4.30798	1.43652	2.21862	1.38986	2.88193	1.08652	1.69001
ENSGALG00000010386	DLK2	1.49407	0.225996	6.61103	3.81644e-11	2.18575e-09	1.67222	1.70203	1.4915	1.43799	1.84052	1.45083	5.3034	3.46795	3.45251	2.84128	5.63536	4.60419
ENSGALG00000010402	HPGDS	1.17529	0.295728	3.97422	7.06106e-05	0.000721883	43.6797	69.6258	39.8669	37.8113	26.1661	35.9724	44.2835	129.952	81.4587	122.379	44.2923	90.0096
ENSGALG00000010406	TMEM63C	-1.0167	0.184424	-5.51283	3.53112e-08	1.06173e-06	21.0954	25.2588	28.3386	17.7	26.2918	48.0593	12.0574	12.4595	18.0635	10.7209	9.42908	11.3864
ENSGALG00000010490	DPYSL4	-1.11094	0.367545	-3.0226	0.0025061	0.0135247	0.896521	1.29457	1.11775	1.96457	1.58787	4.85464	0.63114	0.579406	1.37975	0.631814	0.949894	0.825682
ENSGALG00000010533	ELAVL4	1.84195	0.318434	5.78442	7.27641e-09	2.5525e-07	3.40474	1.33761	1.23325	3.08629	1.45642	5.76655	9.12966	10.9505	6.63408	10.0391	6.38072	7.97236
ENSGALG00000010537	CDKN2C	1.05016	0.202553	5.18462	2.16454e-07	5.13332e-06	5.28032	6.48644	8.99358	7.21595	8.29586	5.68127	11.3428	11.4609	10.8799	11.265	17.0701	13.2451
ENSGALG00000010593	GALC	2.93272	0.264261	11.0978	1.28534e-28	8.65703e-26	10.2022	8.02765	7.15119	6.8757	6.58144	17.6025	63.4665	101.249	55.7299	67.1207	35.9885	59.7417
ENSGALG00000010645	ENPP6	1.92289	0.430953	4.46196	8.12129e-06	0.000115106	0.796775	1.12198	2.30971	0.508295	0.462018	1.59983	3.25888	7.27353	5.48141	3.61162	1.29276	3.17954
ENSGALG00000010692	LRP8	1.07274	0.279418	3.83919	0.000123443	0.00115764	0.444352	0.47499	0.288019	0.411622	0.31576	0.449199	1.18172	1.25487	0.782643	0.353728	0.959631	1.12307
ENSGALG00000010697	SEMA4D	-1.13019	0.122859	-9.19912	3.60894e-20	9.96186e-18	5.45819	5.17869	7.067	4.35957	5.07035	5.03116	2.14068	2.0834	2.52745	2.18504	1.74126	2.38926
ENSGALG00000010721	GLIS1	1.16748	0.329743	3.54059	0.000399234	0.00302943	5.87768	3.21686	1.14461	4.06453	2.2287	2.19094	7.34957	8.69061	4.12575	8.87837	5.01012	6.81971
ENSGALG00000010741	MAP1LC3C	-1.19167	0.208047	-5.72787	1.01697e-08	3.47336e-07	114.332	118.427	157.313	175.378	149.973	183.402	39.4455	49.578	93.0288	78.6616	45.6459	45.3269
ENSGALG00000010812	RYR2	-1.60805	0.586064	-2.74381	0.00607306	0.0265192	0.09757	0.134139	0.069977	0.0451802	0.105124	0.345964	0.0071571	0.058783	0.127789	0.0316781	0.0205376	0.0458552
ENSGALG00000010896	TMEM161B	1.02053	0.266837	3.82453	0.000131023	0.0012182	3.00373	2.90689	1.69949	2.12593	1.83596	1.18096	3.72936	5.59063	3.38591	4.18391	2.63339	3.63887
ENSGALG00000010983	NPY	1.58029	0.468867	3.37044	0.000750469	0.00511181	5.06367	1.80409	1.22542	3.33235	3.20314	1.70517	11.8555	8.96997	2.56193	2.67327	10.6697	10.789
ENSGALG00000011086	ACTA1	1.96056	0.269733	7.26853	3.63428e-13	3.29e-11	60.4145	56.7926	39.7626	29.0233	42.9969	58.8651	204.315	163.969	172.729	66.4461	226.187	201.143
ENSGALG00000011109	MAPK10	-1.51741	0.561163	-2.70404	0.00685027	0.0290761	0.253833	0.410319	0.128411	0.07548	0.0479389	0.0844754	0.0661998	0.0498683	0.104154	0.0274203	0.037602	0.0468115
ENSGALG00000011111	PGBD5	-1.36314	0.341296	-3.994	6.49676e-05	0.000671532	3.90253	5.2347	3.50641	4.7709	6.34029	8.4266	1.2625	1.22659	4.56461	1.07651	1.56413	2.03595
ENSGALG00000011136	CAPN9	1.49689	0.496976	3.012	0.00259531	0.013895	0.359476	0.0996304	0.110506	0.255789	0.347696	0.0986798	0.751806	0.13975	0.330277	0.177893	0.837386	0.663411
ENSGALG00000011190	PLACL2	-1.89815	0.257407	-7.37412	1.65435e-13	1.61017e-11	19.073	8.33099	16.9153	14.1849	17.7186	7.86319	3.86616	2.56941	5.04487	6.59814	3.92548	1.59043
ENSGALG00000011242	OBSL1	2.5281	0.461851	5.47385	4.40354e-08	1.274e-06	1.2192	0.721314	0.0638276	1.32352	0.561979	0.573076	4.25009	4.41064	2.21309	5.63796	4.16016	3.7343
ENSGALG00000011314	LRRC3B	2.83798	0.784959	3.61545	0.000299828	0.00239834	0	0.0405801	0.106531	0	0.0414999	0.0391898	0.112689	0.115442	0.574216	0.159634	0.122619	0.204849
ENSGALG00000011320	TMCC3	-1.40064	0.516481	-2.71188	0.00669022	0.0285406	5.17169	3.39916	4.43024	2.84633	3.35351	16.0081	1.02835	1.33927	6.40664	1.21431	0.838581	1.09624
ENSGALG00000011324	TUBA4B	1.43592	0.291024	4.93405	8.05438e-07	1.58805e-05	0.382688	0.609699	0.68536	1.0201	0.670358	0.675143	1.31225	2.87404	1.21952	2.37481	1.87401	1.74166
ENSGALG00000011355	WNT10A	-1.6059	0.599683	-2.67792	0.00740807	0.0309675	0.765846	0.770993	0.751173	0.718115	0.972695	5.78914	0.182675	0.411008	1.11976	0.448317	0.203695	0.593384
ENSGALG00000011358	WNT6	-2.09984	0.313285	-6.70267	2.04646e-11	1.22627e-09	42.9582	45.7147	37.0354	42.4162	42.6716	85.7883	4.89479	9.58708	19.851	14.3461	6.2985	9.83095
ENSGALG00000011360	PRKAG3	-1.51241	0.569225	-2.65697	0.00788476	0.0324201	0	0	0.161665	0.0800172	0	0	0	0	0	0.0306094	0	0
ENSGALG00000011376	ANKRD9	1.61594	0.30906	5.22857	1.70825e-07	4.16862e-06	2.84496	4.85241	5.05429	6.37978	4.70191	10.4364	7.58502	27.8622	11.1245	20.9138	10.7014	11.6163
ENSGALG00000011391	AMN	-1.08836	0.399506	-2.72426	0.00644462	0.0277389	1.42988	0.935329	0.747628	1.26193	1.4732	2.02212	0.388052	0.443771	0.927774	0.509883	0.12781	0.196943
ENSGALG00000011413	CYP2J19	-1.80184	0.723376	-2.49088	0.0127426	0.0464717	0.901104	0.56606	1.55123	0.708648	0.691509	6.02249	0.326653	0.205029	1.74336	0.166946	0.22219	0.240581
ENSGALG00000011419	DUSP4	-1.10546	0.30109	-3.67154	0.000241098	0.0020177	7.47791	7.89164	7.97647	9.01199	12.6051	21.7895	3.56135	4.36848	9.64432	2.86581	2.70081	3.62584
ENSGALG00000011489	TBXT	-2.1616	0.429734	-5.0301	4.90225e-07	1.03568e-05	1.65868	1.63041	1.20841	1.55222	1.38161	2.83434	0.205772	0.251663	1.19532	0.372682	0.22032	0.167747
ENSGALG00000011537	PDE10A	1.49673	0.1654	9.0491	1.44146e-19	3.62259e-17	0.860053	1.17418	1.21621	0.884558	0.92892	0.802932	2.58858	2.38016	2.26601	1.84624	2.97376	2.90809
ENSGALG00000011571	AGPAT4	-1.15789	0.300682	-3.85089	0.000117689	0.00111017	26.1179	21.6301	19.5316	13.8234	26.747	55.7314	8.17234	13.5084	17.2445	5.53647	8.26016	12.2783
ENSGALG00000011594	NR1H4	1.75129	0.566955	3.08894	0.00200875	0.0113615	0.232856	0.0748533	0.0798248	0.0818976	0.154006	0.285144	0.830467	0.547043	0.229273	0.14995	0.522928	0.356558
ENSGALG00000011608	INF2	1.99091	0.185678	10.7224	7.99318e-27	4.07846e-24	7.05421	6.99763	6.6262	5.13944	4.76486	4.58835	22.3202	21.5634	15.3746	21.1296	22.1524	26.0566
ENSGALG00000011624	PNLDC1	-1.41437	0.57211	-2.4722	0.0134284	0.0483341	0.809157	0.94926	1.53662	0.760037	0.762874	7.29854	0.0227461	0.150633	1.89791	0.674229	0.526475	0.343402
ENSGALG00000011635	TFCP2L1	-2.16046	0.657097	-3.28789	0.00100941	0.00651454	1.33392	1.64802	2.20148	1.73623	2.89188	13.9521	0.350195	0.254836	3.09775	0.237062	0.478763	0.59159
ENSGALG00000011663	FNDC1	1.43454	0.272916	5.25633	1.4696e-07	3.62831e-06	9.35128	8.40627	19.565	5.90467	15.9729	10.4032	25.3356	22.139	31.9815	19.6125	38.6737	31.6606
ENSGALG00000011681	DEPDC7	-1.23819	0.499861	-2.47706	0.013247	0.0478859	9.75966	13.1403	22.365	11.6779	17.556	78.6547	6.14329	5.4643	27.3729	4.87024	7.31791	5.87998
ENSGALG00000011708	MYLK	1.08865	0.245765	4.42964	9.43912e-06	0.000130811	32.9296	26.7787	29.535	20.8794	27.8188	32.4379	61.0315	28.6193	51.4956	32.6012	69.7582	74.3842
ENSGALG00000011796	-	1.90958	0.75827	2.51834	0.011791	0.0439437	0.0657398	0	0.0682196	0.2769	0.0660108	0.123068	0.358176	0.206884	0.195425	0.825931	0.196105	0.129235
ENSGALG00000011803	EMP1	2.07993	0.25762	8.07362	6.82417e-16	1.03518e-13	6.53781	5.55226	3.42207	6.98908	3.91816	5.33264	20.3297	20.5563	16.445	29.8099	10.5495	23.8665
ENSGALG00000011809	GRIN2B	-1.72967	0.618724	-2.79554	0.00518124	0.02349	0.578439	0.602656	1.12699	0.621962	0.965925	2.96872	0.176676	0.181744	1.18439	0.147644	0.152136	0.196537
ENSGALG00000011858	KCNH5	-1.91337	0.398368	-4.80303	1.56282e-06	2.82954e-05	1.35328	1.24707	0.619261	0.909681	1.5469	2.42466	0.207799	0.316575	0.725512	0.221923	0.292713	0.385376
ENSGALG00000011865	SMTN	1.14214	0.172548	6.61927	3.60982e-11	2.08158e-09	9.23808	9.25593	9.34285	10.5188	10.5139	10.0397	25.2799	15.2683	16.3398	14.1163	26.7027	21.1054
ENSGALG00000011902	TAGLN	1.82514	0.231429	7.88639	3.11045e-15	4.18352e-13	290.6	262.777	250.525	268.459	279.041	284.602	1368.68	548.503	824.241	467.198	1092.45	952.148
ENSGALG00000011921	DHRS7	1.14635	0.162565	7.05165	1.76805e-12	1.37191e-10	38.9168	39.2642	44.9863	43.7381	39.4849	60.3985	84.1656	124.132	77.6332	68.1819	104.023	79.0244
ENSGALG00000012033	SGSM3	-1.03453	0.259578	-3.98544	6.73538e-05	0.000690684	6.34507	7.00739	7.29775	7.1328	8.87564	17.3008	3.07907	3.27712	7.44052	2.68534	3.38798	3.01708
ENSGALG00000012045	SLC12A8	-2.01172	0.317963	-6.3269	2.5014e-10	1.20339e-08	2.59736	2.98336	1.98321	1.7727	3.77746	5.71176	0.458689	0.895808	1.49466	0.485964	0.459164	0.745314
ENSGALG00000012089	-	-1.84847	0.702119	-2.6327	0.00847102	0.0341887	14.4855	14.1238	25.5877	10.8654	18.77	99.1627	3.24272	4.52264	29.534	2.12527	2.68038	5.18125
ENSGALG00000012140	FSHB	6.30521	1.05313	5.98709	2.13631e-09	8.4638e-08	0	0.0170071	0	0.0144334	0	0.0159096	0.725444	0.183417	0.139221	0.414352	0.117284	0.169725
ENSGALG00000012211	PDLIM5	1.48931	0.275995	5.39615	6.80868e-08	1.84316e-06	22.8368	12.899	15.2256	13.9137	15.4299	13.091	58.3658	24.5553	27.9645	23.8354	55.9866	45.2976
ENSGALG00000012220	CDKN3	-1.03112	0.26233	-3.93062	8.47287e-05	0.00084368	11.2098	12.6117	12.8787	16.9005	17.4958	29.4955	5.75798	7.39238	13.2269	5.13754	7.2856	6.63854
ENSGALG00000012223	-	-1.05211	0.414858	-2.53607	0.0112105	0.0423139	1.30615	2.63339	2.4515	2.59816	3.23323	6.23433	0.904413	1.07516	3.65879	0.499308	0.973647	0.985481
ENSGALG00000012285	BAIAP2L2	-1.88198	0.378695	-4.96964	6.70757e-07	1.34823e-05	2.25092	2.23763	1.28969	2.98731	2.05544	5.30665	0.412625	0.539778	1.53564	0.593306	0.343427	0.584335
ENSGALG00000012300	RAB32	-1.31421	0.471758	-2.78576	0.00534017	0.0240612	33.4776	27.8277	38.3768	22.9638	28.5306	130.654	9.20585	10.7817	49.3261	11.1862	7.74028	14.2148
ENSGALG00000012350	TDRD7	-1.01408	0.25626	-3.95722	7.58276e-05	0.000766378	4.78259	5.21359	7.20811	4.44914	5.58717	12.6752	2.15113	2.22037	5.2326	2.7454	2.39572	2.53462
ENSGALG00000012394	NID2	1.05959	0.222843	4.75488	1.98566e-06	3.4864e-05	35.8715	41.9215	38.3731	24.8523	40.6543	25.4618	75.5657	83.5567	64.972	37.6769	58.6819	72.665
ENSGALG00000012396	PTGER2	1.07399	0.233109	4.60724	4.0804e-06	6.4452e-05	1.43936	1.30854	2.14876	1.36436	1.48911	2.45466	2.87309	2.48616	2.5199	3.5316	3.17492	4.06016
ENSGALG00000012420	CG-1B	1.164	0.183038	6.35933	2.02631e-10	9.9183e-09	89.3071	66.7492	71.2066	88.1673	69.1219	139.749	171.727	148.149	152.868	222.442	167.473	182.669
ENSGALG00000012464	SOUL	-1.69311	0.64745	-2.61505	0.00892143	0.0355317	0.24843	1.54997	0.746154	0.212888	0.326381	0.393894	0.0463964	0.159613	0.595745	0.105898	0.0604754	0.0943097
ENSGALG00000012470	LYPD6	1.86118	0.416654	4.46696	7.93383e-06	0.000112925	2.08128	0.471559	1.71815	0.141548	0.338123	1.49557	2.84109	4.89622	1.27368	1.91084	1.38639	3.43202
ENSGALG00000012480	NMI	-1.09087	0.123596	-8.82614	1.08347e-18	2.40046e-16	50.7979	45.8558	59.0154	47.3994	65.3167	67.9086	18.5394	22.384	33.7269	22.7709	22.5435	22.0789
ENSGALG00000012481	TNFAIP6	-1.01298	0.308041	-3.28846	0.00100737	0.00650884	2.9145	2.38745	1.47386	1.32211	1.50536	1.57747	0.759796	1.35933	0.961719	0.406876	0.818544	1.0533
ENSGALG00000012544	-	1.14898	0.297988	3.85577	0.000115365	0.00109254	0.774572	0.533952	0.992445	1.18316	1.7029	1.69014	2.55679	1.64406	3.39182	1.23382	3.76913	2.42323
ENSGALG00000012594	NTRK2	1.19177	0.374302	3.18397	0.00145268	0.00874719	1.73873	1.23785	0.836302	2.01937	1.1368	0.263017	1.60197	3.65864	2.64046	3.28303	1.70435	2.21509
ENSGALG00000012710	NCS1	1.48027	0.266712	5.55007	2.85554e-08	8.71044e-07	1.26571	2.86654	2.77621	2.47866	3.41085	3.08518	6.42416	5.6823	8.40909	2.54624	10.6415	7.95075
ENSGALG00000012735	EDN1	-1.24436	0.319561	-3.89398	9.8613e-05	0.000955377	9.43431	3.75194	7.80321	12.7696	4.93211	15.1411	2.04134	3.04165	5.96674	4.42001	1.86165	2.86933
ENSGALG00000012761	DRAM1	1.01454	0.303808	3.33942	0.000839523	0.00560503	1.84908	1.739	1.83831	1.88614	1.34695	1.75109	2.54373	3.44359	1.96253	6.58744	1.97976	2.84934
ENSGALG00000012792	HIPK2	1.03998	0.18317	5.6777	1.36516e-08	4.52492e-07	8.34936	9.93916	7.0209	6.83839	6.72266	5.57415	15.6117	16.4615	10.7643	11.964	13.8041	15.2589
ENSGALG00000012847	CGTL	-1.13442	0.458139	-2.47615	0.0132809	0.0479572	0.488164	1.07767	0.878019	0.35658	0.464225	0.60351	0.168925	0	0.27934	0.275009	0.253636	0.315233
ENSGALG00000012850	RAB19	-1.07292	0.403272	-2.66055	0.00780131	0.0321484	6.23501	6.28321	6.37325	6.66069	7.11661	22.6726	2.04103	3.43147	9.97418	2.13522	2.69128	2.90159
ENSGALG00000012873	SERPINB5	1.26094	0.387052	3.2578	0.00112279	0.00713146	1.16864	2.59676	1.63544	0.324897	1.44324	1.27004	2.10416	3.181	2.76947	5.03734	3.66609	1.94636
ENSGALG00000012941	CDH12	-1.39832	0.404051	-3.46076	0.000538643	0.00390261	0.37555	0.667723	0.489915	0.642746	0.681964	1.5528	0.150917	0.26119	0.473122	0.256128	0.182271	0.308947
ENSGALG00000012947	CAPRIN2	-1.52836	0.282465	-5.41078	6.27507e-08	1.72365e-06	28.7849	25.5767	37.8918	30.8627	39.9466	74.4169	7.97851	9.08636	26.7266	8.51103	10.1125	12.0857
ENSGALG00000012978	CDYL2	1.32367	0.265735	4.98119	6.31953e-07	1.28048e-05	4.86164	3.3307	2.90261	3.55235	3.71768	1.71067	6.51918	10.6884	7.10043	10.4245	5.34371	8.40923
ENSGALG00000012987	CCDC77	-1.33304	0.425521	-3.13272	0.00173193	0.0100663	7.05866	8.33782	9.82371	8.85299	9.5607	29.4314	2.5081	3.0929	12.4505	2.64865	3.04397	2.85073
ENSGALG00000012988	B4GALNT3	-1.45735	0.391257	-3.72479	0.000195475	0.00169128	0.548443	0.361961	0.396143	0.873183	0.286362	1.5134	0.240635	0.224169	0.329679	0.204563	0.167863	0.223949
ENSGALG00000013072	AKR1B10	1.97013	0.469865	4.19297	2.75329e-05	0.000323291	6.96277	27.5029	7.71361	4.46299	5.73156	5.3863	23.8129	52.9047	22.3738	58.2266	15.1366	33.1573
ENSGALG00000013073	UPP1	1.35194	0.23312	5.79932	6.65853e-09	2.37535e-07	2.4512	1.33651	1.33343	1.55134	2.57734	1.06488	3.22093	4.656	4.16429	3.35292	4.68956	4.78086
ENSGALG00000013173	PYROXD1	-1.3137	0.5031	-2.61121	0.00902224	0.0358655	5.6475	6.03496	11.7174	6.72921	9.46612	49.3191	4.1717	3.76084	12.8423	4.15231	3.84425	4.30217
ENSGALG00000013200	GABBR2	1.43118	0.281343	5.08694	3.63882e-07	8.01969e-06	1.20936	1.37679	1.31406	2.27578	2.98305	1.2233	4.36047	4.45612	2.81687	2.90782	5.35674	5.37065
ENSGALG00000013225	VAT1L	-2.35742	0.396179	-5.95038	2.67522e-09	1.04031e-07	38.2702	44.5941	48.4913	27.1659	47.4331	47.8634	3.31051	6.50842	25.0588	3.47489	4.52071	5.02049
ENSGALG00000013239	-	1.08622	0.237193	4.57949	4.661e-06	7.26685e-05	1.82854	2.22532	1.77884	2.42502	2.16913	2.60371	4.60831	2.95653	3.60765	2.34107	4.76146	6.8688
ENSGALG00000013247	CCDC83	-1.114	0.437264	-2.54765	0.010845	0.0412859	0.27403	0.263261	0.449957	0.458709	0.43154	0.712651	0.0920357	0.1314	0.563473	0.181163	0.0996375	0.0986874
ENSGALG00000013265	GYS2	-1.49524	0.58125	-2.57247	0.0100977	0.0391583	0.145285	0.176044	0.243762	0.0458188	0.0726082	0.34003	0.0702487	0.0760861	0.143564	0.034776	0.0178317	0.053061
ENSGALG00000013409	-	3.84754	0.374059	10.2859	8.15622e-25	3.19383e-22	24.4224	26.4278	8.36803	16.6159	12.0115	8.87332	158.35	316.688	138.208	261.432	135.934	165.072
ENSGALG00000013489	CCDC82	-1.07573	0.156107	-6.89096	5.54156e-12	3.93708e-10	12.3001	10.7799	9.82	8.53631	11.386	17.6889	4.61679	4.86847	6.58683	5.8732	3.89743	4.53795
ENSGALG00000013617	PDGFRL	1.06673	0.232239	4.59325	4.36397e-06	6.84175e-05	21.6062	17.7728	12.1965	21.6654	15.4128	22.2436	47.7481	32.0304	20.4749	43.7752	27.8052	38.8291
ENSGALG00000013626	GMNN	-1.19513	0.401553	-2.97627	0.00291781	0.01522	39.7444	48.4432	53.7404	53.4126	62.7567	196.002	14.2617	22.1494	73.6764	26.6555	17.3008	23.2471
ENSGALG00000013634	LRRC2	-1.99231	0.530213	-3.75757	0.000171573	0.00152489	0	0	0	0.125654	0.184771	0	0.0568447	0.0791909	0.0748359	0	0.107476	0.216572
ENSGALG00000013688	UROS	-1.1568	0.351627	-3.28985	0.00100242	0.00648183	6.86967	9.33052	9.75151	10.5375	11.6716	31.8015	3.21263	4.8062	10.7943	3.2832	4.22622	6.09074
ENSGALG00000013697	CNDP1	-2.02027	0.29185	-6.92229	4.44387e-12	3.22525e-10	2.43717	2.50785	1.37915	2.41565	2.69933	4.61623	0.478435	0.432015	0.833569	0.695939	0.57805	0.724496
ENSGALG00000013900	MAP7	-1.13384	0.166627	-6.80467	1.0128e-11	6.76727e-10	3.85315	2.39054	2.69306	2.82	3.69972	3.25405	1.25699	1.24875	1.65095	0.937943	1.32752	1.51421
ENSGALG00000013948	RASL11B	1.28872	0.159492	8.08015	6.46846e-16	9.90145e-14	5.34612	5.40241	5.77306	6.19727	5.45735	10.4874	11.2078	15.1533	15.6904	11.3983	15.3798	14.4907
ENSGALG00000014085	TM7SF3	-1.16043	0.191168	-6.0702	1.27749e-09	5.32434e-08	35.1176	37.3521	42.7621	34.5446	39.5984	64.5005	12.282	17.4537	28.9241	14.1013	13.8219	14.7028
ENSGALG00000014236	ATP8A1	1.44126	0.209388	6.8832	5.85245e-12	4.07204e-10	1.42218	1.24958	1.24272	0.852966	1.08497	1.27047	2.56743	4.03229	3.26112	2.65979	1.4582	3.80141
ENSGALG00000014267	-	1.22017	0.223816	5.45167	4.98998e-08	1.40739e-06	2.77486	3.18508	3.98172	3.4908	4.00046	1.93506	5.66056	8.10068	4.26652	8.56912	7.08893	6.356
ENSGALG00000014337	NWD2	-1.3771	0.304126	-4.52807	5.95238e-06	8.97102e-05	0.338898	0.258356	0.304894	0.111372	0.245398	0.201121	0.112779	0.124311	0.118211	0.0804433	0.0546864	0.0888866
ENSGALG00000014408	LLGL1	-1.15029	0.133656	-8.60631	7.54471e-18	1.54924e-15	44.5871	60.3263	59.0578	61.6017	67.6216	82.1011	23.537	26.506	35.5196	20.8261	22.0288	24.1001
ENSGALG00000014453	FAM46C	-1.49702	0.499561	-2.99666	0.00272954	0.0144211	15.5846	13.0164	16.9323	12.2584	20.0293	53.26	3.6456	3.76223	24.4475	2.67455	4.48664	3.89009
ENSGALG00000014508	CD38	1.3121	0.197203	6.65354	2.86133e-11	1.69049e-09	3.27093	3.21264	5.00428	4.50913	3.32388	2.9707	5.57809	8.72049	7.76914	10.6856	9.91218	8.44288
ENSGALG00000014509	BST1	1.21267	0.176088	6.88674	5.70852e-12	4.00197e-10	8.62698	6.99458	5.2592	5.75279	7.17015	3.19889	15.7765	12.1341	12.092	10.1675	14.1123	11.9765
ENSGALG00000014537	BMF	-1.3717	0.343116	-3.99776	6.39449e-05	0.000662587	7.72577	9.95313	11.2837	6.29992	6.35466	7.09592	2.12341	1.9183	4.0942	6.82235	1.47637	2.04572
ENSGALG00000014649	MBLAC2	-1.41745	0.261171	-5.42728	5.72197e-08	1.58988e-06	5.39069	5.47205	4.81811	7.58836	6.66012	8.34494	1.32469	1.46885	4.1257	2.95566	1.69161	1.63981
ENSGALG00000014673	RFESD	1.43446	0.383791	3.73761	0.000185778	0.00162585	0.717908	0.490039	0.667342	0.598558	0.47475	0.291952	0.997151	1.69291	1.13454	2.21409	0.436132	1.41406
ENSGALG00000014686	FBN2	-1.09387	0.316587	-3.45518	0.000549923	0.00397067	16.2733	12.7262	13.082	9.18752	4.00057	5.48979	4.35373	4.96833	4.10046	4.56824	2.91137	5.63184
ENSGALG00000014690	SLC12A2	2.17304	0.202177	10.7482	6.04204e-27	3.17924e-24	20.8892	16.3786	12.3626	11.7834	17.327	16.4772	64.3606	98.4868	51.8357	52.2372	56.3379	65.2276
ENSGALG00000014719	-	-1.04567	0.190677	-5.484	4.15812e-08	1.21884e-06	10.0067	11.8648	9.80255	13.989	8.36778	9.85159	4.45665	4.4965	4.57293	7.59435	3.94441	4.23692
ENSGALG00000014726	RAB3C	1.0732	0.427915	2.50798	0.0121422	0.0448751	0	0.268918	0.458034	0.15091	0	1.25704	0.157602	0	0.128033	0.0629772	0.268584	0.581042
ENSGALG00000014734	ZSWIM6	2.76615	0.211453	13.0816	4.19282e-39	7.05987e-36	1.95772	1.92613	1.82262	1.85263	1.5325	1.13677	9.94836	14.4945	8.53533	12.1049	7.484	9.09222
ENSGALG00000014766	HAO2	1.26913	0.454566	2.79197	0.00523888	0.0237002	0.249963	0.134914	0.115246	0.142025	0.279537	0.0796719	0.43912	0.352185	0.331165	0.0810578	0.362874	0.464484
ENSGALG00000014847	MYOM1	-1.02215	0.299294	-3.41519	0.000637378	0.00449798	2.9312	1.9028	1.69752	0.779127	1.74423	1.24948	1.3172	0.593803	0.969751	0.331391	0.852109	0.686329
ENSGALG00000014897	TYMS	-1.18089	0.164865	-7.16276	7.90679e-13	6.62361e-11	55.7954	72.0464	66.3145	94.9966	78.2063	119.872	26.1575	31.8292	45.2522	31.7292	29.4419	31.1416
ENSGALG00000014908	FST	-2.34461	0.292288	-8.02155	1.0442e-15	1.5157e-13	177.784	179.352	136.611	183.8	99.356	79.0513	21.282	25.1696	16.9323	43.6735	24.4644	20.9016
ENSGALG00000014934	HS3ST1	1.14735	0.280184	4.09499	4.22183e-05	0.00046564	5.95785	7.81111	6.8643	3.47236	3.00397	3.65718	8.58329	15.9121	9.42386	10.9003	6.25015	10.3544
ENSGALG00000014938	ABHD3	2.9649	0.283909	10.4431	1.57511e-25	6.80043e-23	2.14186	1.55155	1.03158	0.702434	2.92253	1.40437	9.86553	14.0955	10.8894	10.9919	9.82431	11.5387
ENSGALG00000014940	ZUFSP	-1.12141	0.346868	-3.23297	0.0012251	0.0076685	4.60096	5.65836	9.64959	16.0573	7.21847	20.7897	2.52727	2.6854	10.2857	3.85282	4.00995	3.02414
ENSGALG00000014971	SLC2A9	-1.30877	0.33442	-3.91355	9.09474e-05	0.000890333	71.4087	56.1667	24.4742	39.3368	30.6516	18.5317	14.8716	21.8283	12.5146	19.5105	10.5035	10.5916
ENSGALG00000014978	IQGAP2	1.78229	0.197441	9.02696	1.76512e-19	4.3074e-17	16.7481	18.2149	13.0259	20.2377	14.6233	11.4383	44.1716	62.0609	46.1784	64.1406	43.8277	36.6068
ENSGALG00000014980	-	-1.02214	0.342618	-2.98333	0.0028513	0.0149292	0.468989	0.318591	0.411027	0.438607	0.491742	0.927171	0.234463	0.196229	0.486984	0.295378	0.184602	0.182104
ENSGALG00000014983	F2R	1.0273	0.255322	4.02354	5.73294e-05	0.000604453	6.61366	4.20589	3.24485	3.33192	5.50428	3.91911	10.1543	7.67577	5.59525	4.40398	8.89316	10.0491
ENSGALG00000014984	F2RL1	1.57228	0.486402	3.23248	0.00122722	0.00767605	2.38881	1.74882	0.524221	0.818218	1.03598	1.29584	4.39399	6.17947	1.30347	0.838848	2.78475	5.28387
ENSGALG00000014989	S100Z	-4.22984	1.33737	-3.16281	0.00156253	0.0092804	0.64084	0.916261	0	0.72178	0.0279084	0	0.0217135	0.0583984	0	0.0800424	0	0.0272762
ENSGALG00000014999	MAP1B	-1.07084	0.27681	-3.86849	0.000109512	0.00104415	32.5038	32.9184	15.9948	16.2085	20.2171	10.1591	7.92342	10.8547	13.2362	7.82663	6.66807	9.21415
ENSGALG00000015010	NSG1	-1.46589	0.581503	-2.52087	0.0117066	0.0437259	1.20005	1.12551	2.98593	2.20621	1.72212	7.40183	0.445993	0.339327	3.20489	0.779162	0.52739	0.862003
ENSGALG00000015015	CYTL1	1.65901	0.395209	4.1978	2.6952e-05	0.000317577	2.41622	8.31971	10.1887	6.8856	8.12226	6.33307	13.4004	10.426	19.1081	9.82808	44.1731	21.6798
ENSGALG00000015020	TMEM174	-1.40871	0.23432	-6.01191	1.8335e-09	7.38576e-08	12.1009	15.3739	14.3863	18.011	14.6515	21.4762	4.04934	5.57514	9.34005	6.32169	3.6201	4.24727
ENSGALG00000015028	RLN3	3.09386	0.661981	4.67364	2.95912e-06	4.95286e-05	210.316	157.393	105.554	751.663	212.336	89.9706	1373.31	3093.55	1301.07	3221.87	1553.62	1349.45
ENSGALG00000015030	NPC1	-1.15111	0.181009	-6.35938	2.02572e-10	9.9183e-09	256.482	226.229	251.895	224.156	262.308	395.375	87.8436	125.269	179.442	84.2676	84.5934	98.0262
ENSGALG00000015040	SLC16A10	1.01287	0.210017	4.82279	1.41567e-06	2.5938e-05	25.4252	26.5611	19.257	22.9318	20.4924	12.9666	35.5439	63.8526	33.4214	45.1427	33.5795	32.5475
ENSGALG00000015079	UPK1B	-2.18955	0.8806	-2.48643	0.0129031	0.0469757	0.598465	0.58809	1.28005	0.225097	1.85984	13.0281	0.249444	0.324485	2.16993	0.0195918	0.244908	0.508018
ENSGALG00000015084	IGSF11	-1.2539	0.315244	-3.97754	6.9631e-05	0.000712908	12.2397	11.4134	13.03	14.5488	19.4198	37.3001	7.78765	4.85468	12.3489	3.35683	4.90968	7.06047
ENSGALG00000015086	OSBPL1A	-1.07533	0.10425	-10.315	6.03113e-25	2.47688e-22	10.9731	16.9423	15.2776	13.2391	14.2022	17.9585	5.77623	5.99027	8.08802	5.80878	5.13299	6.07667
ENSGALG00000015089	GAP43	2.03949	0.523475	3.89605	9.77735e-05	0.000948882	0.365189	0.17602	0.268349	0.288742	0.447666	0.255987	1.38627	1.29456	0.774564	1.05918	1.22948	0.465918
ENSGALG00000015110	-	2.2766	0.286874	7.9359	2.08972e-15	2.95686e-13	62.1078	48.4658	44.7973	88.1305	44.8527	27.1035	198.807	301.912	193.398	346.796	159.261	198.674
ENSGALG00000015115	MAMDC2	1.14905	0.266113	4.3179	1.57517e-05	0.000201694	10.4336	8.534	5.6857	3.69309	3.76432	5.20896	12.0433	17.3702	8.97102	11.5607	10.7448	13.7396
ENSGALG00000015117	DRD3	1.53112	0.302678	5.05857	4.2241e-07	9.10696e-06	1.78414	1.0228	1.42078	1.26676	1.2222	0.617406	4.02677	1.51905	2.98273	4.45648	2.97869	2.34653
ENSGALG00000015122	TAF4B	-1.03447	0.313154	-3.3034	0.000955217	0.00622685	1.97411	1.40083	2.17218	1.17428	2.83296	4.65508	0.717278	0.823812	1.95148	0.602523	0.682784	1.01861
ENSGALG00000015126	TRPM3	-1.46491	0.367145	-3.99001	6.60703e-05	0.000681673	2.01972	2.62951	0.902747	0.998175	2.11544	0.63158	0.688069	0.637763	0.436309	0.475114	0.553208	0.26961
ENSGALG00000015148	ANXA1	1.17605	0.230835	5.09479	3.49131e-07	7.70467e-06	23.5415	29.7631	22.2133	14.2885	18.6666	24.9015	28.9611	65.965	43.6058	63.3245	29.1537	43.3688
ENSGALG00000015166	GCNT1	-1.30398	0.273613	-4.7658	1.88106e-06	3.32896e-05	4.38758	4.89108	5.02376	5.15157	6.64175	7.5497	1.51666	2.11989	4.55945	1.85303	1.55005	1.15997
ENSGALG00000015167	PRUNE2	1.12007	0.346361	3.23381	0.00122151	0.00764977	0.128889	0.411552	0.361558	0.281751	0.324029	0.347948	0.23594	0.585028	1.31232	0.573041	0.464296	0.604652
ENSGALG00000015170	VPS13A	1.14147	0.157844	7.23166	4.77127e-13	4.1843e-11	2.23192	2.83363	1.92764	1.76907	2.08836	2.94041	3.61579	6.14812	5.34508	4.44996	3.24836	4.77362
ENSGALG00000015198	NOL4L	-1.89505	0.748755	-2.53094	0.0113759	0.0428	0.0994819	0.111647	0.0515419	0.113269	0.0497576	0.644263	0.0255278	0	0.0488296	0.0485014	0.0328207	0.0161126
ENSGALG00000015205	TYRP1	7.39446	0.68792	10.749	5.99003e-27	3.17924e-24	0.0215057	0.02081	0.0223255	0	0	0	1.46493	2.22232	1.43171	2.54314	0.578663	1.14357
ENSGALG00000015216	SYK	1.11648	0.360756	3.09485	0.00196916	0.011194	0.415551	0.348317	0.336349	0.360948	0.392112	0.269591	0.614153	0.396713	0.485369	1.36161	0.331168	0.583025
ENSGALG00000015253	COL8A1	2.73159	0.327241	8.34735	6.98137e-17	1.19951e-14	9.81552	11.8399	7.94255	13.5128	12.3937	8.94322	83.5054	42.878	48.6856	20.1931	101.279	83.553
ENSGALG00000015311	RNF38	-1.09717	0.186864	-5.87149	4.31907e-09	1.6197e-07	53.7884	53.1574	44.1482	54.366	50.2212	29.3018	23.6445	21.9496	20.8719	21.8338	22.5793	27.1984
ENSGALG00000015340	TGS1	-1.75747	0.109443	-16.0582	5.00578e-58	2.80958e-54	34.7425	34.1308	32.5482	33.754	30.9584	27.3	7.50407	9.31554	9.9624	9.60538	8.44426	7.22024
ENSGALG00000015403	EPHA3	1.24577	0.340596	3.65761	0.000254579	0.00210334	5.34852	5.4419	6.62706	2.07665	6.89938	7.62895	16.8412	8.98868	10.8643	4.33568	16.8751	16.7373
ENSGALG00000015404	KIF20AL	-1.89307	0.748096	-2.53051	0.0113896	0.0428267	3.07502	5.04446	6.05758	5.31027	5.15885	16.8788	0.303252	0.696571	7.78268	0.598765	0.662751	0.805033
ENSGALG00000015464	PTGFRN	1.45501	0.185299	7.85221	4.08777e-15	5.29461e-13	15.7845	12.7024	10.7733	10.2333	7.87269	10.9356	27.345	38.7352	25.2483	25.8634	23.2952	27.9686
ENSGALG00000015497	VGLL3	1.69018	0.319254	5.29414	1.19576e-07	3.05992e-06	5.1196	4.31472	4.14255	2.86949	3.24018	2.32808	17.353	9.39232	7.84533	5.30475	17.379	11.5175
ENSGALG00000015517	KLHL32	-1.83096	0.599849	-3.05237	0.00227045	0.0124975	0.231088	1.06886	1.02264	0.321563	0.865092	2.04737	0.116223	0.259046	0.606774	0.112275	0.254957	0.121202
ENSGALG00000015568	SH3TC1	-1.18263	0.2662	-4.44263	8.88669e-06	0.000124178	7.87443	9.04726	10.3039	8.56711	9.76418	13.5354	2.59555	2.91235	7.5806	5.14457	1.75856	3.19652
ENSGALG00000015616	ACOT12	-1.66356	0.650809	-2.55613	0.0105843	0.0405041	0.486312	1.01438	0.957973	0.84796	0.926897	3.01197	0.132628	0.330126	1.58065	0.0468709	0.0960866	0.332671
ENSGALG00000015624	VCAN	1.01454	0.261446	3.8805	0.00010424	0.000998974	33.4351	30.2877	20.7952	27.8766	22.5297	9.51408	42.2078	52.951	50.1409	30.257	44.5652	47.6105
ENSGALG00000015627	HAPLN1	1.23024	0.281236	4.37442	1.21758e-05	0.000163489	9.36339	5.7682	7.44905	6.26882	10.6382	4.87068	15.1409	14.33	13.8361	7.29	19.2058	25.338
ENSGALG00000015677	SUSD1	1.36602	0.408829	3.3413	0.000833859	0.00557164	7.63227	6.28297	4.55948	22.8172	11.1337	4.39193	17.2776	23.9432	13.1653	36.5196	16.9059	25.8982
ENSGALG00000015692	POLN	-1.56133	0.338312	-4.61506	3.92989e-06	6.25439e-05	1.1931	1.90636	1.7041	1.14836	0.824238	0.853623	0.518115	0.658103	0.582193	0.0196749	0.457781	0.2419
ENSGALG00000015712	SLBP	-1.0351	0.154331	-6.70702	1.98638e-11	1.20312e-09	25.4649	21.9198	15.3356	25.1309	27.2971	25.0487	9.45098	12.7643	11.4242	9.07746	9.52003	9.08765
ENSGALG00000015799	ELAVL2	-2.3033	0.612763	-3.75888	0.000170673	0.00151972	1.44798	2.14685	3.72826	2.28241	3.13452	7.24249	0.185391	0.293902	2.55418	0.699149	0.199416	0.198022
ENSGALG00000015835	GRIK1	-1.70537	0.573406	-2.9741	0.00293851	0.0152995	0.075562	0.508887	0.970315	0.21384	0.573341	0.210735	0.0466009	0.0315563	0.313058	0.116757	0.148998	0.147681
ENSGALG00000015910	CD109	1.22945	0.313305	3.92412	8.70467e-05	0.000862679	1.20258	1.26224	1.08689	0.409387	1.11979	1.12911	2.7579	2.1112	3.00749	0.771806	2.11072	2.70956
ENSGALG00000015953	LOC422929	-2.3105	0.768768	-3.00546	0.00265183	0.0141035	0.173065	0.166377	0.157529	0.0914286	0.591256	0.923573	0.0513906	0.0225679	0.213856	0.0839395	0	0.0427639
ENSGALG00000015977	SMOX	1.4858	0.254752	5.83235	5.46508e-09	1.9918e-07	6.64698	6.49	4.34632	7.21939	3.72049	7.51885	12.6084	20.1299	10.2693	22.4615	10.1633	15.3524
ENSGALG00000016102	CYP26B1	-1.4776	0.357418	-4.13411	3.56339e-05	0.000402573	3.50135	2.3784	1.2057	5.0178	2.7061	1.5644	0.594207	0.58827	1.15155	1.41786	0.994514	0.801051
ENSGALG00000016157	-	-2.03985	0.697078	-2.92629	0.0034303	0.0172571	0.133745	0.166131	0.329344	0.0954771	0.26672	2.0358	0.0879728	0	0.305442	0.128106	0.111944	0.0930454
ENSGALG00000016202	HSF2BP	-1.0172	0.228744	-4.44692	8.71113e-06	0.000122436	4.7867	7.36246	5.27783	6.76272	7.75661	10.369	2.45977	2.8874	4.86966	2.71243	3.84772	2.02322
ENSGALG00000016262	XK	-1.44401	0.267892	-5.39027	7.035e-08	1.89832e-06	1.96196	2.46675	3.24967	1.78422	3.31557	3.1832	0.565077	0.868852	1.6707	0.550465	0.977026	0.97569
ENSGALG00000016362	SH3YL1	-1.36731	0.343052	-3.98572	6.72747e-05	0.000690293	3.13864	2.78507	2.8672	4.34596	3.63132	8.07468	0.668015	1.27577	3.20235	1.60647	0.973514	1.2665
ENSGALG00000016415	MAP7D2	1.24038	0.306322	4.04927	5.13774e-05	0.000548221	1.99452	1.37068	2.16346	2.91594	2.00285	1.95595	2.0855	5.45333	3.31221	6.89768	1.76271	3.92141
ENSGALG00000016448	KCNF1	-1.6015	0.281939	-5.68032	1.34442e-08	4.47377e-07	4.17574	3.33441	2.30954	3.30978	2.39435	1.7296	0.63306	0.597559	0.781026	1.29375	1.0698	0.892043
ENSGALG00000016478	MATN3	2.26209	0.196205	11.5292	9.39824e-31	9.30868e-28	11.15	12.4786	11.7945	11.3112	15.2456	11.1035	63.1006	68.5625	49.8894	29.7342	48.9235	60.8093
ENSGALG00000016494	-	-2.38824	0.866956	-2.75474	0.00587387	0.0258573	0	0	0	0	0	0	0	0	0.0542506	0	0	0
ENSGALG00000016498	MFSD2B	4.5911	0.399984	11.4782	1.69741e-30	1.58783e-27	0.0770722	0.185719	0	0.127997	0.193836	0.14417	1.32683	2.12877	2.25642	1.36142	2.8446	2.91833
ENSGALG00000016507	FNDC4	-1.31836	0.292999	-4.49952	6.81062e-06	0.00010033	3.46511	2.77354	4.29024	3.43563	4.75672	7.99714	1.03199	0.949745	3.56028	1.47381	1.30006	1.7127
ENSGALG00000016510	KRTCAP3	-1.08914	0.247261	-4.40482	1.05871e-05	0.000144462	4.64146	5.97883	6.2548	5.00666	6.9991	5.98952	1.34556	3.05159	2.71437	2.06528	1.37036	2.2375
ENSGALG00000016511	ADGRG2	3.29039	0.284247	11.5758	5.46437e-31	5.75057e-28	2.8303	2.57877	3.29054	1.39832	1.69971	1.65342	22.5028	30.4294	15.2095	18.5265	9.40113	20.9047
ENSGALG00000016522	PPEF1	-1.73018	0.218768	-7.90875	2.59995e-15	3.55918e-13	14.6021	12.928	8.19192	12.4741	15.5077	25.3533	2.69565	3.16653	6.34532	3.90827	2.65313	3.64918
ENSGALG00000016563	ASB9	1.7551	0.246425	7.12225	1.0618e-12	8.59551e-11	4.63129	3.60966	4.13607	4.76875	3.60243	1.98269	9.87517	13.0354	11.6255	16.7325	10.8334	8.72854
ENSGALG00000016565	CHRNA2	2.20537	0.840504	2.62387	0.00869369	0.0348534	0	0.0280563	0	0.0765403	0	0	0.139659	0.0611434	0.0575038	0.116526	0.149726	0.0865975
ENSGALG00000016571	GLRA2	2.87143	0.74794	3.83912	0.000123478	0.00115764	0.0134392	0.0129518	0.0137028	0.0330994	0.0132597	0.0121409	0.0606854	0.0839249	0.0664075	0.11418	0.0385216	0.077941
ENSGALG00000016583	ESCO2	-1.09086	0.260418	-4.18889	2.80321e-05	0.000328466	19.0643	27.5336	21.4704	20.8843	26.7388	58.3896	9.87034	14.0287	19.0245	7.32317	11.6958	11.4173
ENSGALG00000016684	RHAG	1.53086	0.583799	2.62224	0.00873527	0.0349701	0.173562	0.117189	0.142637	0.115332	0.0172506	0.14219	0.131536	0.489838	0.206586	0.299751	0.100878	0.372673
ENSGALG00000016702	PPP2R3B	-1.15926	0.200437	-5.78363	7.31042e-09	2.5591e-07	4.36548	4.93978	4.98162	5.30782	5.83124	9.60426	2.04387	1.79335	3.4043	2.43493	1.96118	1.98261
ENSGALG00000016708	ENPP4	-1.09095	0.161342	-6.76171	1.36373e-11	8.63251e-10	17.0441	19.7675	19.0893	23.5036	18.7496	31.8071	6.82424	10.2531	11.9596	10.2283	7.60412	7.70717
ENSGALG00000016774	NPAS2	1.13662	0.248164	4.58012	4.64703e-06	7.25177e-05	1.7639	3.07502	3.32869	2.11635	1.82045	2.52505	3.39113	6.15853	4.04461	7.61634	3.2937	4.7191
ENSGALG00000016828	GRTP1	-1.73557	0.288851	-6.00855	1.87187e-09	7.5044e-08	11.1391	13.1364	14.8587	15.0258	18.3216	21.5829	1.91225	3.40913	9.35051	4.71732	3.33162	3.08219
ENSGALG00000016834	MCF2L	-1.05633	0.388562	-2.71857	0.00655649	0.0281269	3.53673	6.14942	3.76077	2.6214	5.42811	15.0218	1.60523	2.73938	5.62325	1.31596	2.08026	2.23971
ENSGALG00000016843	COL4A2	1.4301	0.231387	6.18054	6.38827e-10	2.89935e-08	70.9324	73.9911	65.3044	55.7282	77.3828	41.5426	211.243	117.877	135.369	103.527	209.45	166.105
ENSGALG00000016884	SLC15A1	-1.85197	0.300288	-6.1673	6.94649e-10	3.13579e-08	27.6814	20.4211	26.5496	19.7914	25.2489	47.9138	5.07626	5.82959	15.8793	4.36132	4.67045	6.81318
ENSGALG00000016913	SLAIN1	-1.27467	0.464397	-2.74478	0.00605507	0.0264888	1.17262	1.89538	2.21679	1.07566	2.55946	5.13146	0.509795	0.52237	2.60215	0.494868	0.685933	0.447659
ENSGALG00000016945	LECT1	-3.2091	0.391707	-8.1926	2.55638e-16	4.17907e-14	19.0457	20.8808	6.18033	22.2659	8.30582	9.71532	1.79058	2.04407	0.661178	1.94303	1.13646	0.548966
ENSGALG00000016954	RGCC	1.62975	0.309123	5.27217	1.34823e-07	3.38829e-06	4.34391	1.08957	5.60128	7.19881	6.84955	4.38547	14.5926	18.0204	9.47329	3.87601	24.4608	20.5413
ENSGALG00000016972	NUFIP1	-1.08746	0.256398	-4.24131	2.22219e-05	0.000270355	14.5132	16.365	16.7932	14.4474	20.3705	37.4992	6.03278	7.09768	16.3485	5.85328	7.11022	7.17572
ENSGALG00000016992	HTR2A	1.65514	0.413699	4.00083	6.31214e-05	0.000655071	0.528927	1.31615	1.20025	0.264186	0.646776	1.13308	0.744399	3.49367	2.60236	2.36193	1.9161	3.45782
ENSGALG00000017023	NEK5	-1.64972	0.334842	-4.92686	8.35612e-07	1.63036e-05	0.261555	0.681663	0.468478	0.526461	0.524282	0.818758	0.0683618	0.157762	0.454878	0.0703096	0.0711012	0.176702
ENSGALG00000017031	TPTE	-1.49132	0.597593	-2.49554	0.0125765	0.0460055	37.419	32.4723	57.5979	35.3757	41.0277	166.635	9.32279	12.1403	72.5052	9.89117	8.95649	10.6531
ENSGALG00000017046	POSTN	1.16586	0.326986	3.56548	0.000363197	0.00281173	52.2875	75.3858	81.0418	21.5075	35.8596	36.0833	60.5519	113.299	126.905	166.75	81.6524	70.6454
ENSGALG00000017052	CCNA1	-2.02602	0.259189	-7.81678	5.41918e-15	6.96551e-13	196.945	239.024	243.743	225.147	221.712	188.5	29.7422	55.3298	75.3088	76.428	28.9382	32.7712
ENSGALG00000017099	RASL11A	1.23853	0.27464	4.50963	6.49401e-06	9.6681e-05	12.5065	9.92212	16.674	30.2334	14.0039	11.6962	39.373	20.7289	31.1887	42.1083	38.002	42.694
ENSGALG00000017106	ATP8A2	-1.89443	0.467768	-4.04994	5.12301e-05	0.000547136	14.4942	12.3966	19.1185	12.7451	18.8172	35.7092	2.02664	2.59046	16.0369	1.66091	2.71437	4.21446
ENSGALG00000017154	ZC3H12C	1.04086	0.283865	3.66675	0.000245656	0.00204264	1.25344	0.920313	0.559299	0.770135	0.683375	1.16477	1.90356	2.13734	1.2637	1.23998	1.0889	2.32541
ENSGALG00000017167	SLC35F2	1.39756	0.269527	5.18523	2.15752e-07	5.12388e-06	15.8336	14.8575	11.1159	20.9393	16.2395	7.06876	29.3745	52.2045	31.6442	44.7637	28.8968	37.215
ENSGALG00000017168	SLN	-1.08393	0.233699	-4.63813	3.51572e-06	5.71156e-05	22.4746	16.503	15.7022	18.7266	23.9252	19.9953	9.08227	5.81042	6.42462	6.84769	13.1712	12.4794
ENSGALG00000017169	ELMOD1	-1.0784	0.202799	-5.31757	1.05163e-07	2.71584e-06	38.7934	39.556	42.4591	45.4798	56.7551	68.0755	13.4066	24.9287	32.3395	20.1102	18.9089	13.7024
ENSGALG00000017191	ANGPTL5	2.70554	0.503706	5.37126	7.81866e-08	2.08638e-06	0.272465	0.220119	0.36821	0.259733	0.423815	0.123566	1.46461	0.923565	3.81696	0.379852	2.21381	1.50586
ENSGALG00000017205	ENDOD1	1.08111	0.204322	5.29119	1.21522e-07	3.10028e-06	3.43585	3.89292	2.87652	3.26463	3.33771	2.75867	7.46294	6.87204	4.60043	4.23792	7.07188	6.94937
ENSGALG00000017216	LOC428094	3.44743	0.408189	8.44568	3.02293e-17	5.47313e-15	6.4129	6.22878	2.05145	10.3939	2.37932	2.23585	44.2005	104.329	41.3463	69.4183	36.0238	41.6267
ENSGALG00000017244	PRSS23	1.06026	0.316977	3.34493	0.000823046	0.00552129	28.3165	19.6941	22.5668	15.2356	30.8282	19.5732	62.6299	31.6044	29.9543	15.7802	64.9665	45.8687
ENSGALG00000017271	-	-1.98496	0.630069	-3.15038	0.00163059	0.0095765	0.0863537	0.0833069	0.198067	0.107044	0.212592	0.176861	0	0.0450015	0.0853609	0	0.0206647	0.0832871
ENSGALG00000017276	ARHGEF5	-1.73191	0.230784	-7.50446	6.16803e-14	6.61512e-12	1.59541	1.74472	1.55587	1.78168	1.96232	3.43992	0.383436	0.458159	0.944423	0.453737	0.38614	0.616125
ENSGALG00000017295	PTHLH	1.08431	0.271885	3.9881	6.66044e-05	0.000685924	9.4882	10.64	5.56975	13.1622	8.25929	4.9558	13.67	26.8026	16.0654	28.1439	14.0222	13.4308
ENSGALG00000017304	PGM2L1	-1.24908	0.186141	-6.7104	1.94089e-11	1.18408e-09	13.4256	16.2025	16.1065	15.6151	19.3797	18.1897	5.7669	5.63374	10.8422	3.58795	5.28026	5.03258
ENSGALG00000017308	CHRDL2	1.39288	0.517819	2.68991	0.00714723	0.0301013	0.0677413	0.113648	0.0816618	0.0340895	0.159243	0.186864	0.157489	0.207273	0.116098	0.30745	0.200956	0.271283
ENSGALG00000017327	P2RY6	1.50792	0.212402	7.09934	1.2535e-12	1.0003e-10	5.39698	4.4534	4.90604	6.21003	4.9138	4.27777	10.0471	15.4037	10.8456	16.3592	8.70798	17.0397
ENSGALG00000017392	SPDYA	-1.23367	0.462746	-2.66598	0.00767653	0.0317769	0.91745	1.12042	1.03193	0.969968	1.09798	3.50377	0.201508	0.387068	1.34811	0.359278	0.258166	0.451468
ENSGALG00000017715	TINAGL1	1.23709	0.111765	11.0687	1.78008e-28	1.15281e-25	16.5548	19.6506	17.2976	14.9385	19.4223	19.619	45.588	37.5173	37.9475	30.4465	43.4641	37.2627
ENSGALG00000018803	TMEM198	1.23298	0.175294	7.03377	2.01029e-12	1.54447e-10	3.88981	3.59979	4.05595	2.69028	3.26093	3.01908	6.26067	7.77209	5.68277	6.70617	7.32104	7.39428
ENSGALG00000018946	LMOD3	-1.72266	0.641556	-2.68513	0.00725024	0.030459	0.0593373	0.0383957	0.0411513	0.190677	0.318171	0.192992	0	0.0621993	0.0194918	0.0975741	0.0196187	0.0574382
ENSGALG00000019061	MMP1	1.97995	0.537129	3.68617	0.000227652	0.00192044	0.233112	0.203037	0.191054	0.293857	0.344702	0.215118	0.442154	0.980189	1.10498	0.134105	1.94361	0.608005
ENSGALG00000019063	MMP10	1.70896	0.335374	5.09569	3.4748e-07	7.67831e-06	224.632	140.924	210.521	259.871	240.355	144.056	876.857	358.818	341.135	292.327	871.407	918.766
ENSGALG00000019077	SPATA13	1.69004	0.223046	7.57711	3.53349e-14	4.02007e-12	5.75663	5.01611	4.38299	3.91533	3.77803	2.45054	11.9922	13.5965	8.42377	9.82656	9.11682	11.2604
ENSGALG00000019175	LOC418544	-2.03979	0.65073	-3.13461	0.00172081	0.0100125	0.153492	0.127303	0.205368	0.0568137	0.30959	0.440286	0.0685235	0	0.195901	0.0217003	0	0.0645709
ENSGALG00000019228	SFT2D2	-1.32915	0.295849	-4.49264	7.03443e-06	0.000102907	18.3455	13.878	21.4941	13.2869	20.0724	35.6827	5.57162	5.21867	17.403	5.8284	5.59393	6.06183
ENSGALG00000019231	CD200R1	1.22299	0.421764	2.8997	0.00373519	0.0183997	0.289476	0.526353	0.197269	0.520849	0.352688	0.231856	0.606105	0.857263	0.262395	1.24061	0.632686	0.573511
ENSGALG00000019552	SERPINB2	1.55868	0.458253	3.40136	0.000670517	0.00467695	7.01444	22.9577	9.22504	1.22454	8.55195	6.55243	15.2601	38.1635	21.702	29.4448	18.2162	24.6031
ENSGALG00000020139	DTHD1	-1.22485	0.471292	-2.59893	0.00935159	0.0368246	0.0734983	0.413563	0.249016	0.567826	0.252108	0.231148	0.0724598	0.114695	0.253462	0.162853	0.0577111	0.0703751
ENSGALG00000020193	PLAC8L1	-2.33418	0.46888	-4.9782	6.41784e-07	1.29884e-05	6.94389	3.45778	4.77305	9.80946	10.6139	12.6001	0.980077	0.621007	3.68887	1.53774	1.03788	0.990334
ENSGALG00000020260	PGRMC1	1.18417	0.179293	6.60465	3.98463e-11	2.25903e-09	135.969	123.266	124.573	116.401	107.224	73.4816	207.837	282.152	213.123	266.127	212.539	215.686
ENSGALG00000020703	GRB14	-1.3119	0.308659	-4.25033	2.13455e-05	0.000260824	38.3097	32.9195	22.7498	31.4895	29.59	15.5121	8.00975	11.711	11.392	17.7645	6.11424	7.34318
ENSGALG00000020745	RHO	-1.00169	0.320495	-3.12545	0.00177531	0.0102724	0.981411	0.900128	0.5217	0.66981	0.621221	0.425829	0.309362	0.5148	0.323794	0.109558	0.400528	0.218872
ENSGALG00000020836	-	1.9125	0.694634	2.75325	0.00590061	0.0259479	0.211565	0.137116	0	0.121362	0.143134	0.136435	0.562813	0.445754	0.279936	0.346758	1.28696	0.139461
ENSGALG00000020984	FAM163A	-1.8236	0.586464	-3.10949	0.00187413	0.0107445	0.944361	1.13822	2.59626	1.67605	2.72316	6.67453	0.157685	0	1.90295	0.370539	0.195888	0.941833
ENSGALG00000021225	CDCA9	-1.58928	0.210177	-7.56162	3.98076e-14	4.49853e-12	13.5564	13.4028	13.6633	15.5557	17.654	25.4367	3.57281	3.39131	9.99226	4.0239	3.18898	4.06591
ENSGALG00000021271	MPZL3	-1.88398	0.677682	-2.78003	0.00543534	0.024347	16.1806	17.1038	28.9553	16.1982	21.4877	74.0895	1.92176	4.76769	28.4479	2.17356	2.79796	4.29223
ENSGALG00000021301	TRIM69	-1.41757	0.399121	-3.55174	0.000382696	0.00293836	10.5139	11.2989	12.2239	11.5022	15.6287	41.5735	3.91473	4.20669	16.1402	3.89284	3.54261	4.79127
ENSGALG00000021304	RANBP3L	-1.11757	0.298096	-3.74903	0.000177518	0.00156658	1.2516	1.04014	0.630703	1.3745	0.999817	0.616976	0.21437	0.862929	0.311905	0.460897	0.495801	0.447161
ENSGALG00000021340	CA9	-1.71109	0.480975	-3.55755	0.000374333	0.00288594	8.45497	9.61426	18.4835	26.0197	13.4261	19.6004	1.36957	2.67648	12.1034	7.19025	1.94883	2.17989
ENSGALG00000021357	-	1.34365	0.414118	3.24459	0.00117618	0.00741743	0.0472282	0.137483	0.176736	0.020915	0.222864	0.170196	0.195447	0.0746969	0.258827	0.479405	0.281838	0.286503
ENSGALG00000021567	EPHA8	-2.46466	0.841898	-2.92751	0.0034169	0.0172051	0.0570027	0.0962237	0.0151392	0.0628983	0.0444244	0.14174	0	0.0149843	0.0141564	0.0433479	0.015158	0.0286354
ENSGALG00000021589	-	1.58872	0.576496	2.75583	0.00585436	0.0257782	0.0930011	0	0.049493	0.0407838	0.0483448	0.0916727	0.189229	0	0.230915	0.0938965	0.296197	0.047003
ENSGALG00000021598	AADACL3C	2.61533	0.506414	5.16442	2.4119e-07	5.64834e-06	0.305502	0.294603	0.750361	0.349672	0.543846	0.0344023	1.04254	3.57098	2.32833	0.936794	2.01766	2.30278
ENSGALG00000021620	TMEM59L	1.97747	0.516438	3.82905	0.000128641	0.00119804	0.0894869	0.086318	0.0972012	0.0201147	0.143851	0.0928522	0.364093	0.258126	0.201878	0.467466	0.228997	0.186615
ENSGALG00000021733	MIR21	1.1	0.280525	3.92122	8.81e-05	0.000869322	0	0	0	0	0	0	0	0	0	0	0	0
ENSGALG00000021772	MIR202	-1.44287	0.34573	-4.1734	3.00087e-05	0.000347276	0	0	0	0	0	0	0	0	0	0	0	0
ENSGALG00000022531	-	-1.05503	0.328075	-3.21582	0.00130071	0.00802538	4.57153	7.94788	4.50348	4.8752	4.64198	13.7721	1.46284	4.78874	3.77509	0.824144	0.227559	1.27767
ENSGALG00000022720	GJB2	-2.11099	0.781211	-2.7022	0.00688814	0.029178	0.666902	0.284431	0.396239	0.569025	0.191714	1.87856	0	0.207972	0.477631	0.0906645	0	0.188939
ENSGALG00000022909	PTPN3	-1.02652	0.387662	-2.64798	0.00809746	0.0330373	1.46379	2.0761	1.63503	1.60352	2.19957	5.50041	0.750568	0.911035	2.86003	0.828973	0.579082	0.93565
ENSGALG00000023036	-	1.10026	0.438543	2.50889	0.0121111	0.0448035	0.0563762	0.0961038	0.208131	0.0606478	0.143146	0.223904	0.195695	0.238346	0.175064	0.199161	0.274449	0.351575
ENSGALG00000023172	LOC430303	-2.00453	0.456815	-4.38807	1.14361e-05	0.000154339	105.553	119.83	163.8	114.412	169.232	413.349	19.5128	29.5464	121.873	14.1242	25.1849	34.8889
ENSGALG00000023364	CDC42EP4	1.30321	0.198211	6.57483	4.87079e-11	2.68021e-09	11.9366	15.246	14.4228	15.8054	17.0359	24.5501	26.6995	54.6086	35.6624	38.3042	35.1117	29.3714
ENSGALG00000023396	ASPHD1	1.01312	0.228458	4.43462	9.22345e-06	0.000128563	1.79933	2.00937	2.61553	2.99994	2.73826	2.65553	4.98356	2.70247	6.04697	3.00298	6.79984	3.64578
ENSGALG00000023472	LOC415852	1.94757	0.347615	5.60266	2.11087e-08	6.69356e-07	2.92181	4.00059	2.12664	3.04982	2.08545	2.07497	8.29367	16.0238	6.57531	9.81925	4.52336	13.4869
ENSGALG00000023542	ALPL	1.29492	0.206301	6.27684	3.4552e-10	1.64347e-08	47.4661	50.2614	43.6776	51.7663	63.6587	30.3857	119.607	134.897	90.8767	89.0023	100.812	104.453
ENSGALG00000023626	NTN1	1.0766	0.223369	4.81983	1.43684e-06	2.62418e-05	11.0846	15.3387	16.3264	22.1596	19.0264	11.8685	36.8226	20.939	20.4482	29.9937	37.983	34.432
ENSGALG00000023689	ASS1	1.24665	0.205459	6.06761	1.29831e-09	5.37122e-08	8.42623	11.4061	8.96796	7.5198	8.78428	10.243	14.9571	24.975	14.0772	29.583	17.1092	20.6356
ENSGALG00000023760	CHIA	3.12665	0.511413	6.11375	9.7317e-10	4.16953e-08	0.26001	0.220901	0.0633655	0.130688	0.0329258	0.0927436	1.35459	1.35208	0.723583	1.13223	0.429524	0.600003
ENSGALG00000023772	HSPB7	1.54748	0.40812	3.79173	0.000149604	0.00136164	1.17644	1.54873	1.65534	1.17865	1.1182	4.70965	5.27714	5.57098	5.73064	2.68875	3.83579	9.29667
ENSGALG00000023812	CCNI2	-1.02054	0.260676	-3.915	9.04059e-05	0.000886578	11.9702	16.4162	15.4737	13.202	22.6254	34.9154	6.3007	7.901	15.1965	4.92367	8.846	7.94586
ENSGALG00000023824	LIPML5	-1.19529	0.441651	-2.70641	0.00680147	0.0288908	2.1363	2.74704	1.23018	0.5912	1.8515	0.684661	1.45799	0.812994	0.969253	0.777852	1.43875	0.923799
ENSGALG00000023872	FAM129B	1.10354	0.170047	6.48961	8.60605e-11	4.54259e-09	18.499	18.5513	17.2317	19.1343	18.3527	16.2173	41.2298	35.5782	25.1412	28.8057	45.8206	33.1154
ENSGALG00000023886	ZNF804A	-2.08064	0.70764	-2.94026	0.00327941	0.0166723	0.116175	0.0948366	0.258749	0.0377847	0.0713509	0.208569	0.0203952	0.0186399	0.0882826	0.00867313	0.0174814	0.0173546
ENSGALG00000023904	FIBIN	1.90576	0.143335	13.2958	2.4486e-40	5.1537e-37	30.6522	27.4779	36.6026	39.8948	34.1974	35.6678	110.397	149.01	103.974	109.13	101.299	112.956
ENSGALG00000024047	MYCL	-1.98488	0.168636	-11.7702	5.55662e-32	6.68303e-29	64.5455	67.2346	68.7621	66.8909	69.1048	65.8481	10.4186	16.6179	20.871	20.6738	12.2366	13.1667
ENSGALG00000024056	CHST3	1.19111	0.212705	5.5998	2.14601e-08	6.76677e-07	4.94327	5.01109	5.65626	4.4814	5.62249	3.40206	12.2997	10.4216	7.75448	6.77521	13.7145	9.55331
ENSGALG00000024318	TMEM200B	1.08606	0.23962	4.53244	5.83072e-06	8.82893e-05	4.5131	4.68632	5.74845	5.39288	6.85924	3.97743	11.8827	7.52387	9.4779	5.13379	15.5087	11.2664
ENSGALG00000025163	MIR1627	-1.70554	0.495653	-3.441	0.000579577	0.00415804	0	0	0	0	0	0	0	0	0	0	0	0
ENSGALG00000025639	LOC112531627	1.00135	0.342645	2.9224	0.00347346	0.0174118	0	0	0	0	0	0	0	0	0	0	0	0
ENSGALG00000025764	FKBP10	1.35087	0.221687	6.09361	1.10396e-09	4.65876e-08	56.725	56.0601	47.7217	55.9179	43.8172	26.3261	125.834	132.809	99.9967	114.908	113.033	83.0445
ENSGALG00000025822	CYP1B1	-1.02038	0.274846	-3.71253	0.000205195	0.00175622	7.14698	9.33634	8.14911	4.51974	10.9599	3.19684	2.80561	3.58709	3.18585	3.55591	4.00896	2.23184
ENSGALG00000025842	TPM2	1.05467	0.230856	4.56851	4.91195e-06	7.5948e-05	159.76	165.85	115.435	194.335	189.769	115.957	326.338	311.307	212.507	192.669	323.4	327.411
ENSGALG00000025937	FXYD6	1.08971	0.110565	9.85578	6.47095e-23	2.26996e-20	26.5325	26.2701	25.7455	23.943	21.8823	30.2419	56.4567	42.5014	42.3679	49.3014	60.0272	48.9239
ENSGALG00000025945	AVD	2.10156	0.59049	3.55901	0.000372257	0.00287394	2.95851	12.7788	3.12701	8.27362	6.91863	23.6288	5.75272	76.5491	7.03353	73.2598	23.1663	31.7451
ENSGALG00000025948	SLA2	-1.28738	0.448176	-2.87249	0.00407245	0.0195863	1.5991	5.30112	4.04416	2.97464	7.07312	13.671	1.31616	1.71618	5.07508	1.0575	1.94305	1.74211
ENSGALG00000026033	SYT2	1.64516	0.404633	4.06581	4.78659e-05	0.000517973	0.0359709	0.0695698	0.101442	0.0526726	0.0371502	0.15593	0.175759	0.152041	0.202758	0.21834	0.1272	0.167679
ENSGALG00000026081	RBM38	-1.23874	0.369952	-3.34837	0.000812878	0.00546615	13.0999	19.2707	23.1339	22.7416	23.8652	62.0194	5.27638	8.08248	24.3113	10.0678	7.60418	7.13753
ENSGALG00000026091	CACNG4	1.8965	0.548184	3.45961	0.000540954	0.00391599	0.0290745	0.0843347	0.060731	0.0499669	0.0885156	0.0280404	0.0683432	0.180163	0.114223	0.286177	0.17647	0.142864
ENSGALG00000026146	CRLF1	1.00728	0.179262	5.61903	1.92033e-08	6.15895e-07	0.969996	0.776559	0.85762	0.904043	1.05784	1.19012	1.51291	2.01738	2.29843	2.12415	1.90378	1.62527
ENSGALG00000026159	PDLIM7	1.24359	0.198539	6.26367	3.76018e-10	1.7735e-08	21.7923	23.5936	23.7512	23.5038	31.4124	22.277	65.8803	40.0706	52.1362	33.7516	76.4381	56.4956
ENSGALG00000026179	FAM163B	-1.8107	0.423823	-4.27231	1.93456e-05	0.000239164	9.92437	13.7745	14.2115	15.1595	14.9779	33.8114	1.77517	3.14342	12.4318	4.48663	2.19677	1.99856
ENSGALG00000026207	CNTF	1.16663	0.273991	4.25791	2.06347e-05	0.000252688	1.55681	2.60963	2.07225	0.964501	1.63619	2.15952	2.92519	4.32149	3.13471	5.96161	3.56226	2.95471
ENSGALG00000026215	CCDC177	1.02031	0.324188	3.14729	0.00164794	0.00966491	0.469705	0.276955	0.46193	0.178087	0.39666	0.457877	0.737004	0.46148	0.585158	0.605577	0.688658	1.29912
ENSGALG00000026301	LOC426385	-1.04197	0.306899	-3.39514	0.000685933	0.00477065	11.0737	12.5474	12.6157	14.1828	16.3582	41.238	5.91097	6.18235	16.206	4.77975	7.71509	6.1477
ENSGALG00000026316	TMEM136	-1.17545	0.446024	-2.63541	0.00840365	0.0340146	1.9562	2.53072	3.28987	2.28264	2.8133	9.27636	0.946666	0.674635	3.99081	1.2023	1.09393	1.04012
ENSGALG00000026361	-	-1.2234	0.496413	-2.46449	0.0137208	0.0491138	0.640843	1.48239	0.523972	0.372194	0.42556	0.757017	0.120017	0.374867	0.244224	0.628784	0.104535	0.397759
ENSGALG00000026395	TRABD2A	1.18368	0.279995	4.22748	2.36319e-05	0.000282208	0.310752	0.259803	0.412798	0.215268	0.316336	0.262191	0.444933	0.39161	0.966701	0.514306	0.703357	0.490948
ENSGALG00000026422	PARP14	-1.05267	0.218819	-4.8107	1.50405e-06	2.73786e-05	37.2229	47.6122	36.0394	36.7512	41.8258	25.7163	11.8096	20.869	18.2691	23.0008	12.2903	11.4133
ENSGALG00000026518	RUNDC3A	1.39877	0.446822	3.13049	0.00174514	0.0101187	0.124343	0.0469834	0	0.088426	0.234241	0.155165	0.369616	0.222401	0.248282	0.128492	0.251928	0.274024
ENSGALG00000026600	C3H1ORF198	1.03835	0.237396	4.37391	1.22041e-05	0.00016374	21.3896	14.5363	17.829	17.6063	17.5683	20.7469	52.1546	23.7738	27.2118	20.0549	41.9843	38.3601
ENSGALG00000026613	-	1.3864	0.397834	3.48486	0.000492388	0.00361571	10.1637	14.1711	7.52137	7.67246	5.76921	9.28394	15.4574	65.7083	15.3862	23.9961	13.3082	12.8568
ENSGALG00000026687	PLCD4	1.37914	0.380833	3.62137	0.000293044	0.00235977	1.08549	0.50106	0.32975	1.43362	0.905448	0.506515	1.35882	1.48907	0.991554	3.02006	1.64957	2.30159
ENSGALG00000026698	FEV	-2.33498	0.740462	-3.15341	0.00161373	0.00950468	0.243116	0.429467	0.173638	0.395029	0.510093	0.53278	0.100657	0	0.160079	0.0821557	0	0.0822747
ENSGALG00000026790	DMRT2	4.64136	0.518187	8.95692	3.3387e-19	7.9179e-17	0.191272	0.229368	0.180252	0.0212418	0.0506458	0.247054	2.79875	6.53684	3.54324	1.40775	1.45388	1.06206
ENSGALG00000026808	-	5.82724	0.49998	11.6549	2.16563e-31	2.43099e-28	0.928391	0.540982	0	0.413527	0.479408	0.236245	31.2743	55.5013	20.5397	23.1912	28.7153	26.5158
ENSGALG00000026811	SHB	1.25846	0.165313	7.61261	2.68614e-14	3.14091e-12	4.41728	3.73455	3.84332	3.72171	4.25362	5.33865	7.47851	12.6054	8.16658	8.17319	8.52726	8.08785
ENSGALG00000026862	CLDN1	-1.51348	0.60095	-2.51847	0.0117865	0.0439437	38.5178	37.2758	62.7296	40.6525	64.8681	203.943	5.85814	17.9382	77.2836	15.8873	13.9155	14.5132
ENSGALG00000026952	-	4.46209	1.35622	3.2901	0.00100152	0.00648101	0	0.0640074	0.0345692	0	0	0	0.157199	0	0.0327716	0.392514	0.167796	0.261434
ENSGALG00000026995	-	1.17183	0.273034	4.29189	1.77156e-05	0.000222775	3.27111	3.31556	5.0219	5.76568	4.48932	7.01233	7.99808	10.6346	5.43212	17.537	10.4625	8.15764
ENSGALG00000027070	TIMP2	1.2278	0.166336	7.38142	1.56605e-13	1.53309e-11	106.808	138.914	125.383	132.632	161.625	109.69	217.684	298.715	208.714	316.191	326.05	292.172
ENSGALG00000027090	LOC422926	-6.18585	0.897047	-6.89579	5.35652e-12	3.85441e-10	0	0	0	0	0	2522.93	10.4052	7.7965	326.248	22.495	17.5348	16.8251
ENSGALG00000027144	PTF1A	-2.33888	0.887616	-2.63502	0.00841334	0.0340211	0.154969	0.185126	0.54658	0.135323	0.290666	0.787736	0	0.155877	0.0769545	0.118071	0	0.0797057
ENSGALG00000027146	GPR139	-1.73259	0.297652	-5.82084	5.85522e-09	2.10663e-07	1.38869	0.978048	1.5206	1.17596	0.966525	1.1929	0.299174	0.19594	0.373439	0.489255	0.255789	0.188232
ENSGALG00000027207	PERP2	1.42436	0.267826	5.31821	1.04795e-07	2.71468e-06	20.5303	25.5668	27.762	11.0847	12.9549	21.989	33.8236	70.3454	53.2617	45.1089	27.2598	64.0342
ENSGALG00000027242	TTF1	1.60063	0.196787	8.13382	4.15954e-16	6.48503e-14	5.50021	5.4086	5.3801	6.00188	5.80257	3.54392	14.4177	18.9769	9.81773	14.6409	13.0997	14.8726
ENSGALG00000027351	LRRC71	-1.78093	0.708888	-2.51229	0.0119952	0.0444487	0.0431725	0.256452	0.188504	0.433275	0.220637	1.41814	0.20533	0.153629	0.430473	0.120039	0.169506	0.37771
ENSGALG00000027365	HIVEP3	1.14604	0.270712	4.23344	2.30143e-05	0.000276204	1.11576	1.00131	0.626246	1.09566	1.10534	0.745998	2.62591	1.3196	1.09786	1.53742	2.47448	2.07538
ENSGALG00000027389	RGS7BP	1.4136	0.208052	6.79442	1.08747e-11	7.23746e-10	2.32726	2.33012	2.12105	2.17925	2.82023	1.77544	6.10845	4.6489	4.51231	3.48156	7.10561	6.1612
ENSGALG00000027407	GPR132	1.49052	0.555802	2.68174	0.00732402	0.0306757	0.0401813	0.0650296	0.0685639	0.0659861	0	0.146683	0.0610815	0.224452	0.0666356	0.315781	0.206124	0.182137
ENSGALG00000027422	MIR125B-1	-1.13163	0.398355	-2.84076	0.00450059	0.0211383	0	0	0	0	0	0	0	0	0	0	0	0
ENSGALG00000027462	P3H4	1.1648	0.139527	8.34818	6.93243e-17	1.19951e-14	19.7568	18.6116	15.5337	21.4186	19.6148	18.6114	45.9133	31.1488	34.5476	33.1635	50.472	38.3077
ENSGALG00000027483	GLRX	1.21654	0.403565	3.01448	0.0025742	0.0138039	11.6152	18.9868	16.4466	13.2565	8.0088	8.1232	10.8964	42.4013	28.6694	53.0551	10.121	18.2692
ENSGALG00000027494	SPTSSB	5.28036	1.39256	3.79184	0.000149534	0.00136164	0	0.0770154	0.0477398	0.763869	0.0269263	0.076017	4.53688	7.90085	0	8.31691	4.01511	9.1946
ENSGALG00000027702	SCN11A	-3.30896	1.27237	-2.60063	0.00930522	0.036702	0.0240127	0	0.122367	0	0.0790776	0.270081	0	0	0.0237664	0	0.0153308	0.0154371
ENSGALG00000027777	CNN2	1.54114	0.213901	7.20491	5.80829e-13	5.06736e-11	26.7966	28.5345	23.1248	27.8279	33.7397	20.9737	82.9885	69.1487	53.8683	43.6582	109.077	70.5981
ENSGALG00000027786	SOCS3	1.83494	0.343394	5.34354	9.11466e-08	2.39801e-06	2.72913	3.86435	2.49386	1.60089	2.39071	3.28071	7.40933	18.5746	4.84334	5.34927	7.47753	7.7341
ENSGALG00000027805	C15orf39	1.39172	0.224595	6.19657	5.77085e-10	2.6262e-08	13.2324	13.1136	18.5174	18.6054	18.9236	8.40529	38.0496	38.5691	27.1954	40.2528	40.6364	35.7906
ENSGALG00000027823	TFAP4	1.56477	0.210795	7.42318	1.14338e-13	1.13919e-11	13.6411	11.4485	9.04948	9.80078	13.6796	8.11586	32.0197	37.7805	18.3551	25.0183	30.9355	29.5715
ENSGALG00000027872	STBD1	-1.34097	0.422449	-3.17428	0.00150208	0.00898152	12.6303	12.8434	26.3357	13.4797	23.3957	47.2117	3.88741	4.97844	21.9104	7.39328	5.04285	4.80993
ENSGALG00000027885	C4ORF19	-2.42714	0.807032	-3.0075	0.0026341	0.0140313	0.0820582	0.215504	0.084536	0.0465159	0.0977718	0.101282	0.0185828	0	0	0.0239476	0.0713015	0
ENSGALG00000027960	GRPR	-1.85098	0.296553	-6.24163	4.33022e-10	2.03665e-08	3.66345	3.98248	4.02181	5.40154	3.98783	4.09623	0.72693	0.841542	1.50857	1.97817	0.593439	0.681613
ENSGALG00000027986	NIPAL1	-1.15299	0.456245	-2.52713	0.0114998	0.0431403	0.381305	0.74125	1.28762	0.41912	0.732144	2.58321	0.243356	0.319455	0.832519	0.4647	0.342106	0.342014
ENSGALG00000027991	TTLL4	-1.03187	0.20179	-5.11356	3.16146e-07	7.06942e-06	5.44358	5.81878	5.38384	5.86245	7.43413	11.4429	2.49417	2.70715	4.66665	2.488	2.71258	2.95753
ENSGALG00000028063	LOX	1.68678	0.249446	6.76209	1.36017e-11	8.63251e-10	6.23309	6.83994	6.55345	2.15589	6.74065	4.20747	18.472	11.1933	17.9353	10.2357	18.5198	15.2847
ENSGALG00000028115	SFN	1.20284	0.455917	2.63829	0.00833247	0.0338077	1.16182	1.19813	4.08346	1.59364	0.785647	0.639947	2.53629	2.8328	6.65742	3.80312	2.93607	3.47458
ENSGALG00000028186	RERG	1.01003	0.198033	5.10033	3.39056e-07	7.502e-06	35.2384	36.8306	37.7456	25.7149	27.5188	18.2763	62.9351	60.4702	58.5059	41.369	52.6972	52.4882
ENSGALG00000028225	SLC17A9	1.95973	0.249022	7.86969	3.55517e-15	4.71354e-13	0.439557	0.499133	0.399012	0.850122	0.636241	0.391814	1.82105	2.10006	1.78242	1.36607	2.70845	1.77434
ENSGALG00000028236	PRRX2	1.5366	0.291573	5.27002	1.36409e-07	3.4078e-06	1.20654	0.752485	0.850495	1.04022	1.08697	0.745063	3.72461	1.44606	1.72917	1.68242	3.94028	2.61105
ENSGALG00000028250	ANKRD22	-1.68749	0.560655	-3.00986	0.00261366	0.0139622	3.63197	3.01558	4.72302	2.61801	7.06407	20.7608	0.574432	0.748954	6.33589	1.3678	0.984263	1.18528
ENSGALG00000028256	CCL19	-1.37232	0.303684	-4.51891	6.21591e-06	9.28691e-05	1.9415	1.91257	2.43828	3.11649	3.77494	1.80382	1.07407	0.946498	0.682711	0.421482	1.24989	1.19079
ENSGALG00000028326	-	1.80946	0.395656	4.57331	4.80073e-06	7.44334e-05	0.130483	0.380052	0.351192	0.580455	0.277534	0.268841	0.876756	1.29045	0.388937	1.46394	0.57692	0.66633
ENSGALG00000028376	FGF19	2.42619	0.852203	2.84697	0.00441378	0.0207794	0.0215797	0.0208417	0	0.0180566	0.0875009	0.040935	0.0337046	0.267619	0.0427797	0.24868	0.173267	0.106235
ENSGALG00000028457	-	-1.14003	0.351182	-3.24627	0.00116927	0.00737938	0.217337	0.136614	0.132526	0.142648	0.149309	0.136405	0.0721268	0.135191	0.0321883	0.0817032	0.0613472	0.0519656
ENSGALG00000028567	MYL9	1.08231	0.131338	8.24067	1.71252e-16	2.85498e-14	198.686	236.449	196.38	272.637	223.245	212.081	468.647	363.147	403.245	380.271	500.112	462.389
ENSGALG00000028570	C6orf132	-2.05813	0.514219	-4.00244	6.26924e-05	0.00065242	4.91406	8.87381	12.5708	10.3203	11.9269	36.2062	1.72322	2.35746	10.3269	1.07307	1.52571	1.92988
ENSGALG00000028595	CCNO	-1.77068	0.348878	-5.07535	3.86779e-07	8.44694e-06	54.9922	73.2307	60.6712	81.2779	87.3303	118.041	7.95189	16.9348	40.5806	28.5526	10.0012	12.9406
ENSGALG00000028608	BTC	-1.67852	0.283003	-5.93112	3.00878e-09	1.15931e-07	31.6094	39.5498	38.21	37.071	35.2362	32.9121	4.75958	10.934	17.7271	13.9517	5.57807	5.61884
ENSGALG00000028697	GNAT1	5.86754	2.09931	2.79499	0.00519014	0.023524	0	0	0	0	0	0	0.599564	0.0324198	0	0	0.102209	0.158278
ENSGALG00000028721	LMOD1	1.57457	0.273206	5.76329	8.24876e-09	2.85787e-07	7.00255	5.27467	4.25579	4.26235	5.74619	5.15841	19.6211	7.88356	9.7265	8.68306	21.7554	15.3793
ENSGALG00000028759	LYPD6B	1.45993	0.573688	2.54481	0.0109339	0.0415304	0.753317	0.614363	2.1831	0.693233	1.39876	6.62452	4.70754	7.11252	4.60124	5.40919	1.03143	4.93775
ENSGALG00000028774	S100A10	1.3259	0.186191	7.12121	1.06982e-12	8.61899e-11	171.065	184.958	166.707	219.146	165.821	115.527	321.36	472.601	410.943	336.307	363.663	478.07
ENSGALG00000028815	VWA5A	3.42135	0.517824	6.60717	3.91739e-11	2.22841e-09	0.226582	0.14549	0.327303	0.0715042	0.211892	0.430392	2.55046	1.06219	0.606772	2.09524	2.00679	3.45459
ENSGALG00000028871	SLC38A3	-1.78944	0.715422	-2.50123	0.0123761	0.0454602	0.0516045	0.124939	0.194826	0.207156	0.164032	1.01853	0.0865025	0.0808972	0.102921	0	0.113651	0.132352
ENSGALG00000028924	S100A16	1.0059	0.256955	3.91468	9.0523e-05	0.00088721	5.63266	6.14489	4.08207	2.85083	2.62636	6.095	8.63149	15.3723	5.09154	7.83783	4.63904	5.62621
ENSGALG00000028928	LCAT	3.64926	0.487966	7.47851	7.51687e-14	7.91056e-12	1.60761	2.29796	3.96487	0.69398	0.977858	0.48171	21.2166	42.4269	11.5471	15.2253	13.3259	12.9981
ENSGALG00000029083	NXPH2	-1.97288	0.769031	-2.56541	0.0103052	0.0397161	0	0.9509	1.1526	1.26834	1.06212	3.62331	0.0976507	0.127574	0.963308	0.240249	0.438769	0.362587
ENSGALG00000029151	ISLR2	1.36178	0.382575	3.55952	0.000371535	0.00286968	0.675736	0.318079	0.353117	0.537348	0.313499	0.180903	1.39869	1.01475	0.729891	1.00171	0.806516	0.498512
ENSGALG00000029235	CPNE4	-1.04281	0.179187	-5.81967	5.89648e-09	2.11695e-07	3.17737	4.79485	4.30959	4.18666	3.34165	4.16686	1.29973	1.97994	2.72486	1.7908	1.40531	1.1776
ENSGALG00000029244	SMAP2	-1.24027	0.226678	-5.47151	4.46222e-08	1.28656e-06	77.3828	74.7029	95.3633	84.0369	100.978	176.558	27.4804	36.4055	69.8652	31.2798	31.6301	35.7397
ENSGALG00000029278	-	-2.75482	0.640331	-4.30218	1.69129e-05	0.00021412	1.11253	0.305412	0.258519	0.281804	0.169908	0.251383	0	0	0.0785854	0	0.0895667	0
ENSGALG00000029298	F5	1.0943	0.404741	2.70372	0.00685687	0.0290894	3.68035	4.29107	4.68624	1.31446	2.0955	1.5718	2.58894	6.75183	7.67989	12.3268	2.62164	3.51261
ENSGALG00000029416	TRPC6	1.31345	0.278072	4.7234	2.31938e-06	4.01374e-05	0.553223	0.583991	0.530621	0.439356	0.29385	0.274974	1.43146	0.864552	0.752117	0.724321	0.975413	0.860559
ENSGALG00000029429	TGFBI	1.00146	0.265212	3.77605	0.000159333	0.00143238	76.0409	75.6603	49.7176	32.1001	41.3744	40.8292	90.3018	151.344	78.0836	80.7737	73.5591	102.376
ENSGALG00000029446	LOC419112	-1.51531	0.558152	-2.71488	0.00663005	0.0283414	10.5028	11.9558	17.7686	11.0214	13.1789	66.6249	3.29334	3.17345	23.3811	1.57054	4.3263	4.77152
ENSGALG00000029532	CXCL13L3	-1.66289	0.609117	-2.72999	0.00633353	0.0273657	0.13313	0.0647475	0.676709	0	0.134985	0.192286	0.107322	0	0.0667977	0	0	0
ENSGALG00000029583	PLBD1	2.12052	0.230814	9.18712	4.03501e-20	1.09583e-17	79.0622	69.5764	49.1416	74.4837	59.4212	33.7513	239.644	375.532	212.569	234.489	222.507	211.003
ENSGALG00000029596	HAS2	1.73911	0.243873	7.13124	9.94694e-13	8.17007e-11	1.29888	1.57467	2.35635	0.984037	1.86993	1.98678	3.99328	7.31286	3.62871	3.88233	4.97503	6.07068
ENSGALG00000029610	RGS9	-1.25267	0.299038	-4.18899	2.802e-05	0.000328466	4.04294	4.47744	3.65562	1.7669	1.43407	3.70101	0.994918	0.647497	1.78372	1.814	0.878135	1.38936
ENSGALG00000029764	RXFP2	1.13702	0.278489	4.08281	4.44945e-05	0.000487442	1.35907	1.44945	1.13907	0.817196	1.23989	1.85225	2.38697	1.84007	3.06925	1.20128	2.69153	4.49872
ENSGALG00000029768	LOC107051813	1.10973	0.260396	4.26172	2.02862e-05	0.000248964	2.44173	3.00156	3.85268	4.64983	2.58863	4.31324	5.61403	5.70133	5.02232	11.7398	6.22229	5.26582
ENSGALG00000029794	AKAP7	1.16128	0.171056	6.7889	1.12994e-11	7.46114e-10	2.2008	1.80074	1.52095	2.19481	2.76303	2.33005	2.50647	1.83868	1.83716	2.08517	3.12818	2.58984
ENSGALG00000029795	-	1.30191	0.448667	2.90174	0.00371101	0.0182975	0.176649	0	0.473387	0.156621	0.186474	0	0.147394	0.452787	0.173275	0.0892825	0.290176	0.356898
ENSGALG00000029799	LOC107049024	-2.05043	0.676278	-3.03193	0.00242993	0.0131979	0	0.0925697	0.295112	0.0825388	0.191432	0.13907	0.0374445	0.100987	0.142342	0.093104	0.0957758	0.0466611
ENSGALG00000029865	-	-2.80516	1.11497	-2.5159	0.0118728	0.0441801	1.14e-10	0.128055	0.0942719	0.0163082	0.0799194	0.131318	8.75e-08	0	0.109824	0	0.0688688	3.41e-33
ENSGALG00000029968	GADD45B	1.47889	0.166889	8.86156	7.89002e-19	1.81989e-16	9.01594	9.87185	10.7621	10.7629	9.24317	10.9341	28.2669	27.6339	15.8449	22.6024	32.1345	26.7968
ENSGALG00000030096	PDPN	1.5459	0.251422	6.14861	7.81635e-10	3.4726e-08	22.4902	28.6568	17.2222	33.059	23.0913	14.0547	72.3247	51.0215	52.3327	36.167	72.5651	78.0439
ENSGALG00000030160	DRC7	1.25254	0.320683	3.90584	9.38994e-05	0.000915505	1.25685	0.947719	0.624943	2.50123	1.99312	1.29359	2.52844	3.69266	1.87919	4.63791	2.42465	3.16102
ENSGALG00000030175	FBXL2	-1.19851	0.280883	-4.26693	1.98178e-05	0.000243927	8.02925	7.10776	10.1542	8.25654	8.68262	18.1738	2.8318	2.38654	8.12278	4.15098	2.92773	3.51551
ENSGALG00000030276	SHTN1	-1.15897	0.161391	-7.18112	6.9141e-13	5.87978e-11	12.5691	10.9531	10.2942	11.1485	12.8636	18.5096	4.08799	5.33883	7.52466	4.69905	3.83089	5.1388
ENSGALG00000030324	KIAA1324L	1.65323	0.350284	4.71969	2.36206e-06	4.08341e-05	5.51932	5.76935	2.59951	2.80972	4.18898	1.69814	11.0375	20.1395	7.68589	12.844	6.68579	8.22868
ENSGALG00000030442	FOXC1	1.07334	0.227431	4.7194	2.36538e-06	4.08494e-05	0.767411	0.596801	0.595981	0.442984	0.863702	0.541681	1.36873	1.13285	0.899343	1.11848	2.2586	0.709025
ENSGALG00000030512	PROCA1	-2.71614	0.58561	-4.63813	3.5157e-06	5.71156e-05	7.34878	7.57006	9.79716	62.0151	15.2281	8.08593	0.700816	2.34138	3.83374	5.03806	1.70491	1.66872
ENSGALG00000030569	TRIM41	-1.10736	0.26243	-4.21965	2.44682e-05	0.000291163	12.4897	15.6198	15.9837	19.0516	17.6421	41.5947	6.60036	7.18148	15.066	6.62383	7.30419	7.48971
ENSGALG00000030687	LGI3	1.28924	0.268108	4.80865	1.5195e-06	2.76001e-05	3.43321	3.78777	4.53709	6.23198	4.93556	3.90053	13.179	5.49484	11.1086	4.94559	13.3891	11.4423
ENSGALG00000030845	ENHO	-1.84895	0.364768	-5.06884	4.00243e-07	8.69586e-06	18.0901	26.5833	28.4986	29.8143	36.3598	50.2895	3.30201	5.80967	19.087	10.5384	4.7743	5.54554
ENSGALG00000030855	-	-1.77816	0.546398	-3.25434	0.00113656	0.00721621	2.7821	3.97346	2.526	5.96477	2.89667	4.42995	0.838347	1.15123	0.487673	0.445511	2.35179	0.461342
ENSGALG00000030863	SLC28A2	-1.68326	0.663305	-2.53769	0.0111588	0.0421659	0.0486207	0.0473184	0.179689	0.0844695	0.22601	0.0239387	0.0198466	0	0.0242481	0.0241652	0.0510854	0.0243557
ENSGALG00000030904	LRP1	1.05049	0.170969	6.14433	8.03029e-10	3.54758e-08	18.1944	24.0336	24.8766	18.0685	20.3287	14.5695	46.0204	34.5806	32.412	33.9502	43.0346	35.7837
ENSGALG00000030996	-	1.53896	0.325681	4.72536	2.29708e-06	3.98333e-05	1.12298	0.743661	2.02477	1.50276	1.38655	0.783799	3.33196	3.17249	2.62406	2.99012	3.24477	4.96091
ENSGALG00000031094	EDA2R	1.50227	0.197542	7.60481	2.85327e-14	3.30914e-12	3.43261	4.23826	2.43583	2.39734	3.00408	3.44923	8.79161	7.96425	6.78509	6.07281	10.3142	8.9438
ENSGALG00000031105	SLC4A4	1.3928	0.355116	3.92209	8.7785e-05	0.000866935	2.14386	5.47315	4.22249	1.4057	2.37249	3.96334	2.78141	11.1615	8.52999	12.8493	5.93935	6.80572
ENSGALG00000031301	TULP1	1.11238	0.390621	2.84772	0.00440335	0.0207395	0.139975	0.448162	0.414953	0.264851	0.117927	0.0900842	0.531812	0.368069	1.06101	0.468163	0.285496	0.73564
ENSGALG00000031325	TGFB1	1.20077	0.17696	6.78552	1.15666e-11	7.60776e-10	21.6919	23.0753	21.3855	27.2143	19.0139	18.9098	46.3156	57.893	40.9293	51.2208	38.2419	39.2404
ENSGALG00000031360	FDX1L	1.27739	0.247152	5.16847	2.36023e-07	5.56604e-06	87.4608	64.7319	45.8674	80.2807	93.8536	51.1633	180.418	194.715	91.4101	165.905	146.569	152.075
ENSGALG00000031400	-	1.65092	0.457253	3.61052	0.000305585	0.00243283	0.0343265	0.0334261	0.0704671	0.0287665	0.0340969	0	0.0261458	0	0.102524	0.131537	0.166406	0.066715
ENSGALG00000031411	KCNN1	-1.62637	0.236047	-6.89003	5.57806e-12	3.94636e-10	3.46	5.19562	5.38716	6.60782	5.55096	5.841	1.08285	1.19766	1.91965	2.5209	1.03928	1.57759
ENSGALG00000031425	PMP22	1.03536	0.168701	6.13727	8.39535e-10	3.68127e-08	20.9446	24.0333	25.4744	25.3223	30.5366	26.6881	51.2273	45.3127	45.0502	28.3113	64.3605	51.4528
ENSGALG00000031430	SELE	1.28034	0.376332	3.40214	0.000668592	0.00466739	1.51508	0.724512	0.818344	0.230946	1.54391	1.24544	2.38648	2.25981	3.21294	1.19121	3.22676	2.25258
ENSGALG00000031590	B3GAT2	-2.06803	0.413177	-5.00519	5.58072e-07	1.16059e-05	2.25109	5.5158	11.5178	3.42206	5.19837	2.66176	0.841243	0.303616	1.31242	1.25825	0.750036	0.963787
ENSGALG00000031652	AK5	1.50162	0.495924	3.02792	0.0024624	0.013347	0.11765	0.681752	0.273259	0.245513	0.303809	0.257472	0.382505	1.62338	0.33319	1.35858	0.542856	0.519405
ENSGALG00000031786	BLVRA	-1.0651	0.257643	-4.13402	3.56477e-05	0.000402573	2.64612	2.99297	2.24308	3.73084	2.64595	3.05165	1.27749	1.15508	0.89242	2.18356	0.965204	1.35826
ENSGALG00000031812	TDRKH	-1.21632	0.270058	-4.50391	6.67135e-06	9.86235e-05	1.26716	1.79683	1.18519	1.45882	1.73293	4.58326	0.595126	0.701945	1.19643	0.54609	0.688899	0.801936
ENSGALG00000031824	LOC107050016	-1.1188	0.156984	-7.12686	1.02686e-12	8.39333e-11	4.67952	5.35921	5.70741	6.98956	6.39926	8.75732	2.30535	2.45457	3.31729	3.20691	2.00783	2.05963
ENSGALG00000031862	BCL11B	1.52586	0.570705	2.67364	0.00750322	0.0312103	0	0.0673789	0.0992865	0.0854774	0.14446	0.0606191	0.265277	0.0576592	0.222062	0.217006	0.124703	0.130507
ENSGALG00000031895	SDK2	1.06875	0.399421	2.67574	0.00745639	0.0310692	0.259507	0.255071	0.78061	0.378742	0.357072	0.447092	1.46063	0.327877	0.671895	0.290889	1.33892	0.805318
ENSGALG00000031997	SFRP4	3.75	0.339745	11.0377	2.51419e-28	1.56792e-25	28.9577	29.9873	36.124	24.6318	19.2688	10.9633	389.465	563.232	275.415	173.02	215	201.388
ENSGALG00000032028	SERTM1	-1.15134	0.211472	-5.44442	5.19732e-08	1.45854e-06	2.09088	1.60234	2.47363	2.52677	1.97234	3.74257	0.844908	0.66745	0.822912	1.07366	0.951304	1.31876
ENSGALG00000032087	MC5R	-1.03947	0.389689	-2.66743	0.0076433	0.0316834	2.89599	7.1994	4.81762	6.20537	2.67536	4.25089	0.868845	1.74087	2.83722	4.17388	0.799231	1.24386
ENSGALG00000032184	CSPG5	1.5934	0.382515	4.1656	3.10529e-05	0.000357395	60.6222	68.8838	19.8706	92.0453	43.3606	33.0812	107.423	232.671	93.5928	212.309	92.4465	125.401
ENSGALG00000032199	FGR	1.28424	0.183471	6.9997	2.56509e-12	1.92817e-10	8.25442	7.19592	7.64919	9.84491	7.72102	5.20642	16.7971	19.7866	13.334	19.7564	16.3895	18.7224
ENSGALG00000032220	ELN	1.15891	0.184064	6.29622	3.0499e-10	1.45479e-08	75.2605	69.5631	59.7146	55.389	76.0894	52.5931	147.069	119.5	122.445	112.476	184.348	139.694
ENSGALG00000032308	-	-1.21551	0.284814	-4.26772	1.97482e-05	0.000243291	1.53279	2.59353	2.89352	1.51021	3.10957	3.4853	1.16295	0.973773	2.03396	1.01077	0.616618	0.704841
ENSGALG00000032313	KDELR3	1.01796	0.206926	4.91946	8.67842e-07	1.68349e-05	26.8494	23.5617	25.4291	35.3559	32.1663	20.9272	60.4495	45.3749	38.4394	37.0034	61.2367	57.3408
ENSGALG00000032402	VSTM2B	2.56673	0.371011	6.91822	4.57361e-12	3.30517e-10	1.76198	0.72104	1.28393	0.523217	2.07914	3.52284	9.48043	14.5721	5.2782	6.97985	8.0741	8.90554
ENSGALG00000032565	-	1.02232	0.353183	2.89459	0.0037966	0.0185997	0.032928	0.0957298	0.0682801	0.193704	0.164865	0.092669	0.228128	0.243618	0.294337	0.349436	0.161333	0.19304
ENSGALG00000032588	ARPC1B	1.05167	0.141614	7.42636	1.11629e-13	1.11882e-11	31.3037	40.7201	37.2066	28.1035	29.5111	30.7904	58.1106	74.9733	54.374	61.8798	55.2896	60.8869
ENSGALG00000032628	SRCIN1	-1.23632	0.217257	-5.6906	1.26596e-08	4.24627e-07	2.99535	2.93007	1.54175	2.74354	3.72567	2.14674	0.962546	1.03239	0.788072	1.44129	1.15514	0.920948
ENSGALG00000032736	MGLL	1.17589	0.236022	4.98213	6.28897e-07	1.27583e-05	27.0441	38.3804	36.3616	30.436	33.5439	15.2138	61.4618	86.1091	56.8451	63.5699	59.8797	44.0128
ENSGALG00000032784	-	-1.87206	0.752148	-2.48895	0.0128121	0.0466949	0.0524018	0.0336644	0.64239	0.0590886	0.0349746	0.0809842	0.0268798	0	0	1.00937	0.0345152	0.242392
ENSGALG00000032893	SHISA4	1.0385	0.149102	6.96507	3.28251e-12	2.42416e-10	2.40885	2.11794	2.11819	3.52512	2.77407	2.0765	5.1933	4.55614	4.50204	4.96698	5.50109	5.22233
ENSGALG00000032974	ADAMTS2	1.36239	0.222947	6.11081	9.91241e-10	4.22545e-08	16.9213	18.1273	16.8687	12.8557	19.2754	9.58124	45.3762	35.4267	33.611	20.8937	44.0935	43.104
ENSGALG00000033002	SLC7A3	1.08595	0.227525	4.77288	1.8161e-06	3.2325e-05	8.74419	7.34207	8.28002	11.4885	10.2037	7.41131	22.5803	14.8963	13.237	9.54305	21.973	19.093
ENSGALG00000033009	-	-1.13072	0.284884	-3.96907	7.21541e-05	0.000734097	25.2848	31.1907	31.4856	30.2317	29.3654	78.5574	12.7694	17.445	27.3543	13.8371	8.93788	12.3939
ENSGALG00000033083	ATOH8	1.09068	0.198202	5.50285	3.73702e-08	1.11173e-06	6.23148	5.6081	10.3197	5.05683	8.49582	5.23772	13.4476	10.4767	16.2197	11.913	16.4788	12.613
ENSGALG00000033089	LOC414835	-1.38157	0.181064	-7.63026	2.34278e-14	2.77801e-12	2.55954	2.72383	2.0256	2.18037	2.24631	1.95821	0.686526	1.26092	0.782923	0.590836	0.714407	0.796076
ENSGALG00000033090	VDR	1.26006	0.244965	5.14384	2.69182e-07	6.17505e-06	2.38819	1.67151	2.47817	2.35765	1.99114	1.30139	3.18816	5.70537	3.83957	7.40508	4.91866	3.64872
ENSGALG00000033178	KLF6	1.02036	0.254502	4.00925	6.09122e-05	0.000636248	16.7034	13.0688	14.329	7.40265	14.7387	10.3733	31.8258	20.8283	18.4775	13.6221	28.6	26.6967
ENSGALG00000033234	JAK3	2.19919	0.324499	6.77718	1.22546e-11	7.9669e-10	0.103443	0.169471	0.186111	0.134514	0.191849	0.172978	0.701739	1.1523	0.468034	0.425385	0.565683	0.365977
ENSGALG00000033279	RAX	-2.60119	0.894933	-2.90658	0.00365405	0.0180696	0.672914	0.384007	0.375144	0.417542	0.745822	5.54414	0	0.285155	0.613536	0.0589484	0.201426	0
ENSGALG00000033286	ARSJ	1.13693	0.237843	4.78018	1.75141e-06	3.13061e-05	7.45338	6.06402	6.13037	4.48684	7.24249	4.51637	14.5956	10.8238	10.0159	7.08775	17.765	12.3339
ENSGALG00000033365	ALDH1A3	1.25346	0.408586	3.0678	0.00215637	0.0120031	3.32028	17.6014	8.63396	2.95644	4.48653	7.09472	6.38496	21.8572	14.5443	21.0273	12.922	17.9928
ENSGALG00000033376	APOH	2.43829	0.789457	3.08857	0.00201125	0.0113654	0.0651915	0.0473962	0.0167752	0.067316	0.0487616	0.0448389	0.124555	0.341131	0.0646445	0.542125	0.0791095	0.0159051
ENSGALG00000033405	DBN1	1.01122	0.219282	4.6115	3.99778e-06	6.34445e-05	12.0276	11.9301	12.787	13.1842	15.704	9.22077	30.0171	21.2636	17.6511	14.6716	35.5694	21.3077
ENSGALG00000033408	ZBTB7C	-1.18046	0.220198	-5.36091	8.28023e-08	2.20257e-06	3.80332	3.59411	4.17544	3.81596	6.07906	7.82033	1.39092	1.67696	3.1558	2.22289	1.92718	1.8178
ENSGALG00000033439	PRDM14	-3.78166	1.36453	-2.7714	0.00558155	0.0248236	0.0389424	0	0.0426973	0	0	0.53795	0	0.0399863	0.0386781	0	0	0
ENSGALG00000033520	DCSTAMP	1.82519	0.492487	3.70607	0.000210499	0.00179281	0.102145	0.155391	0.0749546	0.0733508	0.131025	0.26968	0.263352	0.392876	0.173498	0.336635	0.639957	0.512999
ENSGALG00000033522	AOC3	1.16502	0.215291	5.41137	6.25432e-08	1.72076e-06	6.0516	4.7976	5.64689	3.74685	4.43377	3.36115	12.9547	8.43154	10.0504	6.47064	11.8202	8.59055
ENSGALG00000033535	RGS16	-1.92701	0.181348	-10.626	2.25545e-26	1.11698e-23	14.2637	12.1577	7.8253	9.74313	10.6902	16.1061	2.63894	3.09875	2.99896	3.39469	2.24776	2.60125
ENSGALG00000033683	PHOSPHO1	2.34775	0.230911	10.1673	2.77365e-24	1.06143e-21	11.4341	10.3117	9.94337	11.3828	9.71009	5.05597	37.4388	66.9048	39.7767	39.9346	45.4892	38.2989
ENSGALG00000033696	RALY	-1.08009	0.296335	-3.64482	0.000267576	0.00219457	9.24848	11.4409	13.1059	14.3592	14.3492	33.9176	4.99959	5.63156	13.0473	6.05568	4.45975	6.05332
ENSGALG00000033698	-	-1.2119	0.485039	-2.49855	0.0124701	0.0457355	1.13291	1.38396	2.05357	1.97908	1.4529	5.73002	0.589467	0.9987	2.32842	0.664577	0.279447	1.00504
ENSGALG00000033769	-	-1.27897	0.327982	-3.89952	9.63839e-05	0.000937016	11.1905	12.8161	12.7618	22.0034	11.9908	7.77148	4.44924	3.14326	4.14161	9.47151	4.52556	3.60701
ENSGALG00000033783	FER1L6	-2.22689	0.893934	-2.49111	0.0127345	0.046463	0	0.0530762	0	0.0232309	0.00544917	0.015279	0	0.0115174	0	0.0106633	0	0
ENSGALG00000033791	-	1.07794	0.290702	3.70805	0.000208864	0.00178092	0.987884	0.829465	1.47863	0.464788	1.2261	0.399748	2.09577	1.82622	2.34509	1.62368	3.17883	1.36704
ENSGALG00000033925	LOC422895	1.51858	0.296742	5.1175	3.0961e-07	6.95095e-06	0.596485	0.704519	0.602854	0.554087	1.12494	0.592391	2.42782	3.76246	2.6125	2.6634	0.940269	1.17222
ENSGALG00000033960	ADGRB1	1.61084	0.550492	2.92618	0.00343155	0.0172582	0.0155118	0.0510971	0.0405852	0	0.0315089	0.05583	0.0173598	0.0476163	0.0740218	0.119489	0.0899302	0.111204
ENSGALG00000034000	LOC101747620	-1.23939	0.33553	-3.69382	0.00022091	0.00187296	0.189677	1.04408	1.46859	0.873323	0.427656	0.636042	0.258044	0.126568	0.322651	0.472387	0.310847	0.197567
ENSGALG00000034048	BCL11A	1.13049	0.171739	6.58263	4.62195e-11	2.57697e-09	2.15205	3.14403	2.17734	3.14051	2.49415	2.0533	5.24804	6.1144	3.85258	4.86141	4.8139	4.97119
ENSGALG00000034054	LOC420039	-1.28754	0.455731	-2.82522	0.00472488	0.0219227	0.266253	0.118844	0.107581	0.162803	0.209605	0.613659	0.131256	0.0427397	0.121197	0.0612362	0.0424219	0.0806365
ENSGALG00000034067	FMOD	1.62948	0.350279	4.65196	3.28799e-06	5.39603e-05	27.2248	22.8731	16.4949	21.2185	39.2452	23.6623	122.372	47.2379	41.1369	27.3528	109.566	73.1135
ENSGALG00000034077	KCNK5	1.28578	0.23579	5.45307	4.95064e-08	1.40099e-06	9.85796	8.23694	7.05148	6.11681	6.89713	3.83601	15.5583	21.5825	11.1341	14.5959	12.7643	15.8937
ENSGALG00000034094	SP5	-1.53826	0.610286	-2.52056	0.0117167	0.0437537	0.642911	0.834003	0.515272	0.795125	0.716692	5.07297	0.680713	0.318231	0.546111	0.533428	0.223795	0.240721
ENSGALG00000034107	TRIM63	-1.71489	0.374182	-4.58305	4.58251e-06	7.15773e-05	0.890806	1.35815	2.4263	3.0844	3.14905	1.42796	0.337005	0.435273	0.575552	0.985631	0.546122	0.328048
ENSGALG00000034346	RDH10	1.04469	0.237102	4.40609	1.05252e-05	0.000143968	5.22319	7.10859	7.12302	5.86427	5.74909	12.1821	10.2345	20.2281	12.2724	15.5474	12.2554	8.75919
ENSGALG00000034436	CEL	3.32969	0.563845	5.90533	3.51942e-09	1.33468e-07	3.18508	4.19353	4.80183	1.00403	0.539184	0.322948	14.046	39.0274	14.4334	8.60593	27.4769	27.5238
ENSGALG00000034478	CCL4	1.48177	0.438017	3.38291	0.000717223	0.00494335	4.08868	3.98629	4.00311	10.8905	7.85802	1.86029	18.6996	11.3392	10.2032	4.39507	24.3762	12.05
ENSGALG00000034500	CIDEA	-1.48785	0.289549	-5.13852	2.76918e-07	6.31807e-06	5.96544	5.86866	4.76627	6.38449	5.42154	16.0216	2.3959	2.42489	3.45444	1.93891	2.2606	1.92277
ENSGALG00000034502	SCD5	-1.13552	0.275756	-4.11786	3.82413e-05	0.000426994	30.1056	36.7865	40.0973	39.6682	40.1296	95.9389	13.6566	14.7988	36.1682	18.7789	13.1678	18.0525
ENSGALG00000034505	CDKN2A	1.10332	0.294869	3.74175	0.000182746	0.00160199	0.878943	1.61155	1.33672	1.08665	1.12222	0.83655	1.64844	3.63372	3.2753	1.67967	1.59965	1.76909
ENSGALG00000034507	CHST2	1.08098	0.145471	7.43093	1.07841e-13	1.09387e-11	4.64224	6.60624	6.12304	4.81242	6.96654	6.79243	10.1473	14.4996	11.3835	11.7966	10.4075	13.2316
ENSGALG00000034561	C2H8ORF34	-1.14434	0.373229	-3.06606	0.00216897	0.0120492	2.80812	0.8472	1.6326	3.35684	2.54883	2.08106	0.54136	0.459661	1.28778	1.34073	0.924877	0.98076
ENSGALG00000034605	-	2.10756	0.660688	3.18994	0.00142301	0.00861584	0.185929	0.0765011	0.0831122	0.0227919	0.0269283	0.0509666	0.127042	0.222206	0.235756	0.337661	0.190425	0.0262213
ENSGALG00000034616	INHBA	2.20376	0.306104	7.19939	6.04846e-13	5.24969e-11	1.57627	0.880756	0.870038	1.36985	0.604868	0.494017	5.35348	3.31456	3.50407	3.94787	3.03746	3.90875
ENSGALG00000034701	-	1.21168	0.473428	2.55938	0.010486	0.040256	0	0	0	0	0	0	0	0	0	0	0	0
ENSGALG00000034716	HEY2	-1.12106	0.232064	-4.83083	1.35967e-06	2.50758e-05	18.3654	19.0882	23.5957	21.3499	25.7933	46.1135	7.87749	10.2345	16.9644	10.5155	6.54337	8.89661
ENSGALG00000034761	-	-2.37554	0.767795	-3.09398	0.0019749	0.0112191	0.0561002	0.221137	0.320774	0.174124	0.141732	2.56017	0.0896015	0.0604256	0.112373	0.252695	0.0854521	0.0273706
ENSGALG00000034868	KRT7	1.51581	0.202146	7.49861	6.44994e-14	6.83045e-12	73.6696	122.034	99.8805	61.3688	112.153	99.3082	156.294	343.8	243.021	231.196	238.873	250.708
ENSGALG00000034975	FUT7	1.20748	0.477966	2.52628	0.0115277	0.0432014	0.564874	0.477531	0.377046	0.373894	0.257761	0.385759	0.431776	1.06219	0.3143	1.56782	0.376522	0.818498
ENSGALG00000034982	CYP11A1	1.33124	0.2625	5.0714	3.94895e-07	8.59074e-06	325.145	307.831	201.575	358.064	298.397	175.754	818.107	878.96	466.705	400.796	542.325	700.282
ENSGALG00000035007	USP35	-2.03337	0.2017	-10.0812	6.69069e-24	2.50351e-21	7.72673	8.24282	8.16025	9.40318	10.1994	7.55007	1.5107	2.37747	2.64316	2.49759	1.33068	1.32855
ENSGALG00000035016	ID2	1.17222	0.224239	5.22753	1.71792e-07	4.1801e-06	77.7367	81.7789	63.1838	75.7684	56.8212	37.6638	150.726	159.979	106.206	127.828	151.184	104.493
ENSGALG00000035219	ALB	3.34171	0.337186	9.91058	3.74468e-23	1.34155e-20	2.00006	3.60611	2.8574	1.89493	2.06355	1.3901	20.7802	35.182	23.441	7.42254	12.1663	30.1682
ENSGALG00000035244	HIST2H3A	1.22816	0.495925	2.4765	0.0132679	0.0479411	0.469411	0.253514	0.390742	0.630607	0.873986	0.473933	1.12191	0.754312	1.13837	0.152717	1.95075	1.31653
ENSGALG00000035282	IGF2	1.59756	0.203093	7.86613	3.65787e-15	4.81182e-13	70.8871	85.3965	63.5298	82.1869	79.4028	56.7959	258.275	198.036	155.689	132.667	291.816	195.459
ENSGALG00000035317	ID3	1.23319	0.1537	8.02338	1.02873e-15	1.50623e-13	20.4823	24.9543	23.9157	26.3087	25.6914	37.6826	54.7887	71.8761	56.392	40.8483	60.8004	52.1708
ENSGALG00000035360	XPO6	1.13856	0.139063	8.18732	2.67105e-16	4.32453e-14	31.8632	26.0321	28.9094	24.0796	29.541	29.971	58.0717	71.5886	50.9058	59.2136	47.2174	45.8217
ENSGALG00000035365	GTSF1L	-1.1163	0.230884	-4.83489	1.3322e-06	2.465e-05	4.73915	7.03458	5.42505	6.91122	6.85253	9.16186	1.04859	2.3664	4.47681	3.9476	1.729	2.4488
ENSGALG00000035389	-	3.21065	0.463525	6.92659	4.31109e-12	3.14243e-10	0	0	0.0593727	0.0976062	0	0.109031	0.133637	1.99114	1.38287	1.35456	2.153	1.54754
ENSGALG00000035505	AOAH	-1.39092	0.352112	-3.9502	7.80845e-05	0.000785416	3.11353	3.13815	3.99768	4.13793	3.26513	2.55233	0.927305	1.13891	1.12624	2.69955	0.588639	0.578449
ENSGALG00000035568	LOC100858759	-1.60901	0.611557	-2.63101	0.0085132	0.0342931	0.0950423	0.212315	0.133256	0.135837	0.0324497	0.0302747	0.0504993	0.0331476	0.0628621	0.0316563	0.0327958	0.0318936
ENSGALG00000035599	CD24	-1.57685	0.248435	-6.34713	2.19373e-10	1.06449e-08	129.456	142.507	129.165	131.554	147.194	189.867	35.643	49.2698	92.7751	31.4583	35.1657	23.9678
ENSGALG00000035799	-	-1.23494	0.159979	-7.71942	1.1686e-14	1.45755e-12	3.62553	2.99362	4.81574	3.09065	3.93223	3.97193	1.53793	0.927924	1.43538	1.24601	1.56351	1.17907
ENSGALG00000035873	-	1.14911	0.409366	2.80704	0.00499993	0.0228898	0.12223	0.30688	0.152488	0.0213002	0.122199	0.141061	0.362571	0.397564	0.171388	0.23585	0.244025	0.428356
ENSGALG00000035911	CBX4	-1.0052	0.237124	-4.23913	2.2439e-05	0.000271623	24.5743	29.6615	26.6673	30.479	30.8409	67.0915	12.8321	11.8961	27.7408	14.4576	12.6654	12.8319
ENSGALG00000035916	SHANK2	-1.94844	0.573044	-3.40015	0.000673481	0.00469374	1.87544	2.63329	1.61247	1.51094	1.89087	5.44131	0.289993	0.365385	2.18129	0.254907	0.19062	0.261506
ENSGALG00000035950	NGFR	-2.12545	0.327742	-6.48512	8.86612e-11	4.63627e-09	24.0726	25.9378	25.7401	25.0726	29.6805	64.0312	5.50742	4.43459	15.1591	4.01807	4.88677	5.69094
ENSGALG00000036001	SMAD2Z	2.00952	0.314723	6.38503	1.71361e-10	8.5366e-09	166.868	126.867	81.3377	140.566	97.2118	49.8787	315.333	568.751	292.046	608.846	344.73	308.766
ENSGALG00000036086	IGSF9	1.54159	0.180372	8.5467	1.26655e-17	2.3962e-15	164.177	193.701	168.004	165.207	179.268	129.505	612.302	476.107	411.324	287.056	525.849	468.787
ENSGALG00000036097	CDH18	-1.6994	0.625351	-2.71751	0.00657743	0.028188	0.171964	0.106543	0.0855907	0.0413763	0.0611805	0.0911226	0.0187271	0.0636336	0.0723597	0.0236211	0.0119789	0
ENSGALG00000036133	KLF15	-1.23073	0.221211	-5.5636	2.64265e-08	8.10509e-07	9.21261	10.4459	7.27321	5.08427	7.20094	5.3037	2.72718	4.08343	2.59346	3.07127	2.59063	2.36628
ENSGALG00000036142	LOXL3	1.03263	0.184137	5.60791	2.04787e-08	6.50606e-07	26.2386	27.571	27.5675	26.4472	28.3751	18.3565	59.2073	44.9347	41.5896	34.717	56.0414	54.6596
ENSGALG00000036175	CAPG	1.40084	0.225095	6.22332	4.86745e-10	2.26404e-08	11.7277	10.4145	14.0579	10.698	8.37181	8.26064	41.3814	23.2611	24.351	23.4681	23.8231	26.6545
ENSGALG00000036219	STK35	-1.14065	0.437374	-2.60796	0.00910842	0.036129	3.28252	5.12852	5.92474	4.47669	5.49269	22.9906	1.69978	2.05738	6.89787	2.0552	2.2649	1.80854
ENSGALG00000036300	SEC61A2	1.14037	0.141342	8.06819	7.13469e-16	1.07262e-13	30.5283	31.4874	35.4578	37.7291	32.0917	36.5256	67.64	96.5954	70.5214	68.5276	53.3112	57.675
ENSGALG00000036346	AMH	-3.41079	0.396869	-8.59424	8.3817e-18	1.68013e-15	253.02	223.241	248.283	180.187	399.795	279.684	17.2712	10.6496	69.606	12.3909	15.4721	16.0549
ENSGALG00000036358	LMO3	-1.24032	0.317969	-3.90075	9.58952e-05	0.000932804	7.19768	4.7422	4.22475	5.68761	5.58124	2.83282	1.65757	1.68022	1.38488	4.02271	1.05166	2.7665
ENSGALG00000036360	TRPV4	1.84664	0.702255	2.62959	0.00854876	0.0344035	0.016938	0.0653444	0.0362134	0.150698	0.0532842	0.0677175	0.0829054	0.405137	0.0838958	0.225603	0.145872	0.051228
ENSGALG00000036412	TMEM108	-2.58555	0.352635	-7.33208	2.26601e-13	2.19282e-11	5.63815	3.81722	5.57485	7.61658	2.0172	2.02097	0.825112	0.426406	0.715399	1.00191	0.582626	0.563244
ENSGALG00000036447	-	1.34353	0.330967	4.05941	4.91971e-05	0.000530333	0.458647	0.574658	1.10494	0.677042	0.376313	0.180142	1.72646	1.50213	1.84361	1.26774	1.93998	1.34433
ENSGALG00000036498	LOC107049991	1.26351	0.144196	8.76245	1.91047e-18	4.17773e-16	61.5948	63.0352	69.874	62.0873	64.7052	48.6174	155.81	139.95	126.913	109.541	144.119	128.88
ENSGALG00000036514	-	-1.02757	0.323788	-3.17358	0.00150571	0.00899683	1.53924	1.90732	2.4913	2.03161	2.14335	4.30526	1.28168	1.16725	1.70601	1.38992	1.13605	0.660931
ENSGALG00000036587	LHX4	-1.8059	0.705731	-2.55891	0.0105	0.0402729	0.709749	0.968234	0.734258	0.875973	1.34134	3.67142	0.142299	0.170578	1.20038	0.24292	0.307818	0.0691101
ENSGALG00000036686	PLTP	2.67154	0.406142	6.57785	4.77285e-11	2.6436e-09	15.4567	15.4612	17.716	12.2795	6.36822	7.89193	65.5633	88.908	52.7997	163.757	20.9989	55.0291
ENSGALG00000036711	S100A11	1.42408	0.149536	9.52326	1.67824e-21	5.33175e-19	130.069	114.364	120.06	109.419	115.213	106.901	345.332	299.82	259.057	193.358	303.127	305.431
ENSGALG00000036728	PRDM16	3.06002	0.275467	11.1085	1.14064e-28	8.00254e-26	0.29308	0.201722	0.338781	0.411774	0.480786	0.300449	2.18152	3.14252	1.25222	2.38707	3.05967	2.87439
ENSGALG00000036798	COL4A1	1.28462	0.211713	6.06775	1.29711e-09	5.37122e-08	113.906	112.965	107.203	90.2228	109.173	66.8059	292.737	162.652	197.816	161.869	275.346	237.8
ENSGALG00000036806	GDF11	1.87888	0.275073	6.83047	8.4635e-12	5.72483e-10	0.946031	0.654321	1.20208	1.60141	1.52601	0.634578	3.49743	4.19341	3.20494	2.91874	3.75621	3.77403
ENSGALG00000036831	LOC101749846	1.95924	0.379141	5.16756	2.3717e-07	5.57784e-06	0.26169	0.209761	0.518097	0.174671	0.36971	0.11274	0.724224	0.819474	1.25942	1.16389	0.652608	0.841258
ENSGALG00000036838	PXDNL	1.39149	0.347757	4.00134	6.2984e-05	0.000654645	0.226613	0.180052	0.105108	0.138706	0.242887	0.135287	0.496404	0.208918	0.234142	0.535261	0.238205	0.600523
ENSGALG00000036871	NOS1AP	-1.00843	0.302003	-3.33913	0.000840409	0.0056065	23.8387	35.3998	33.7519	34.4619	40.0459	101.897	13.3259	15.0174	35.2488	14.6387	15.6141	20.8033
ENSGALG00000036883	MET	-1.06377	0.388254	-2.73989	0.00614595	0.0267612	2.12715	3.34766	3.71666	1.44857	2.31574	6.03692	0.599971	1.19893	3.53734	1.0985	0.726434	1.19741
ENSGALG00000036916	-	-1.02768	0.367295	-2.79795	0.00514275	0.0233658	4.07775	3.54658	3.10448	2.13963	2.51883	5.17811	1.23042	1.86774	2.90389	1.10294	0.887491	1.15291
ENSGALG00000037011	-	1.03754	0.348708	2.97538	0.0029263	0.0152487	1.1063	0.730839	1.29824	1.47006	0.796823	1.00536	3.69372	1.30963	1.2152	0.848539	2.313	2.46362
ENSGALG00000037015	DACH1	-1.06105	0.335058	-3.16676	0.00154146	0.00917545	0.714101	1.03321	1.10353	1.08967	0.685555	0.500659	0.369876	0.30722	0.47689	0.543689	0.260129	0.280344
ENSGALG00000037082	ASCL1	-2.27759	0.785162	-2.90079	0.00372223	0.0183421	0.373023	0.279012	0.0453019	0.434967	0.849906	0.256838	0	0.168186	0.124155	0.04179	0.0938361	0
ENSGALG00000037138	KCNQ1	1.0568	0.284574	3.71363	0.000204309	0.00175165	10.6591	3.87956	4.20433	6.31952	5.29138	3.94475	9.68389	16.1991	8.55894	12.3677	8.65131	10.4271
ENSGALG00000037156	LOC420807	-1.18632	0.439828	-2.69724	0.00699161	0.0295494	2.44619	3.82776	4.5856	2.99639	5.21272	10.2128	0.78608	1.78277	5.20568	1.1184	1.86618	1.22479
ENSGALG00000037166	LOC101752158	1.07396	0.307467	3.49292	0.000477772	0.00352221	1.49912	0.801765	0.840934	0.841369	0.819548	0.82447	2.36074	1.74298	1.42171	0.816768	2.34281	1.67762
ENSGALG00000037193	HECW1	-1.1947	0.347948	-3.43356	0.000595704	0.0042538	3.30184	4.57054	4.2538	4.45706	6.29379	14.8846	2.32574	1.24561	4.57723	1.5659	2.79931	2.42424
ENSGALG00000037316	OCLN	-1.22119	0.406122	-3.00694	0.00263891	0.0140481	4.25066	4.16057	5.04309	5.22015	4.48091	16.4776	1.99843	2.08898	6.20343	1.72459	1.19209	1.78866
ENSGALG00000037366	GRID1	-1.0895	0.282911	-3.85105	0.000117614	0.00111008	0.829987	1.3067	1.19026	0.516191	1.11058	0.91327	0.41781	0.403237	0.571358	0.322468	0.48075	0.472766
ENSGALG00000037378	-	2.19298	0.82117	2.67055	0.00757266	0.0314525	0	0.397299	0	0	0	0	0.46643	0.835168	1.18884	1.62638	0	0.448632
ENSGALG00000037402	NOV	1.31503	0.317694	4.13929	3.48377e-05	0.000395548	221.786	156.869	121.438	83.3854	176.225	118.801	549.512	294.863	197.742	178.847	448.271	364.327
ENSGALG00000037603	LOC100858796	2.54934	0.190915	13.3533	1.13367e-40	2.72696e-37	5.65471	6.65333	6.96289	6.69627	6.5488	7.59133	25.6286	49.84	27.7388	42.6299	28.5577	35.774
ENSGALG00000037625	FBN3	1.5343	0.357754	4.28871	1.79715e-05	0.000225656	16.45	18.2503	16.548	16.7565	24.282	7.73856	63.1977	26.1235	41.2686	15.605	77.5499	43.1988
ENSGALG00000037675	COL14A1	1.26043	0.322825	3.90436	9.44739e-05	0.000920162	25.0682	16.8993	26.8303	28.8019	26.4888	15.4503	60.7553	17.213	30.8958	51.8095	61.3482	79.2101
ENSGALG00000037777	MSC	1.80622	0.616188	2.93129	0.00337561	0.0170431	0.139751	0.132808	0.0770905	0.0626934	0.0765449	0.238301	0.309487	0.412487	0.477053	0	0.335318	0.577127
ENSGALG00000037812	USP43	-1.23481	0.229436	-5.38194	7.36861e-08	1.97883e-06	19.5805	21.5504	18.0652	24.4104	26.7491	45.7805	8.70289	6.60811	15.4749	13.3315	7.7734	7.43195
ENSGALG00000037919	-	-2.27606	0.59752	-3.80918	0.000139427	0.00128723	0.424895	0.27607	0.370677	0.363489	0.0213812	0.136667	0	0.0748033	0.0213109	0.20783	0	0.139921
ENSGALG00000037944	LNPK	-1.25684	0.130048	-9.66442	4.27043e-22	1.43811e-19	81.5836	85.7598	82.9361	86.6803	88.081	88.6399	25.2563	33.5242	40.9071	40.9945	25.2028	29.4635
ENSGALG00000038241	CARTPT	-2.01087	0.762371	-2.63766	0.00834811	0.033863	4.24159	1.87766	8.90454	44.6968	3.42768	9.90803	0.529531	1.33256	2.02821	7.60763	1.40948	4.64674
ENSGALG00000038242	CACNA2D2	-1.15261	0.246235	-4.68092	2.85586e-06	4.79909e-05	11.9435	10.0466	11.087	13.0488	10.3775	5.39247	4.35186	4.19602	3.87948	6.70309	3.6246	3.39205
ENSGALG00000038311	COL18A1	1.11004	0.201718	5.50295	3.73498e-08	1.11173e-06	20.0671	29.3665	18.8856	24.6653	28.0668	15.8931	45.7283	54.5354	35.9166	32.8007	47.2002	53.7174
ENSGALG00000038320	COLGALT1	-1.55239	0.28994	-5.35416	8.59552e-08	2.27565e-06	14.6619	13.6267	19.9436	15.1073	18.0107	40.9075	3.4126	4.08305	11.8832	4.06225	3.54339	3.16231
ENSGALG00000038363	-	1.90319	0.646497	2.94384	0.00324163	0.0165201	0	0	0	0	0	0	0	0	0	0	0	0
ENSGALG00000038364	CCN3	1.65749	0.340987	4.86084	1.16887e-06	2.19659e-05	174.237	109.765	101.815	166.115	175.1	54.4313	565.863	181.793	268.208	357.078	554.329	324.932
ENSGALG00000038396	-	1.61573	0.59149	2.73163	0.00630218	0.0272582	0.0213064	0.102303	0.110875	0.107836	0.107646	0.0200422	0.216896	0.132589	0.122723	0.32829	0.213428	0.150826
ENSGALG00000038399	PLEKHA6	2.80563	0.220875	12.7023	5.73818e-37	8.7836e-34	1.06157	1.51115	0.865173	1.48625	1.78163	1.49713	7.4793	12.5049	6.30393	8.86967	8.29259	9.51941
ENSGALG00000038458	LOXL1	1.95187	0.179651	10.8648	1.69556e-27	9.51664e-25	18.4214	17.3158	21.4614	20.6068	22.5207	13.9162	77.28	75.6427	59.9064	78.3454	57.0022	62.6819
ENSGALG00000038574	-	-1.14566	0.423011	-2.70835	0.00676183	0.0287888	0.055235	0.0530792	0.0572876	0.0309686	0.0555675	0.121359	0	0.0766394	0	0.0355993	0	0
ENSGALG00000038612	-	1.00542	0.251868	3.99187	6.55555e-05	0.000677192	30.4026	22.9255	21.5331	30.9949	24.4824	14.1414	45.7036	72.8196	38.5246	40.6374	33.2768	41.2499
ENSGALG00000038817	CKS2	-1.2668	0.2319	-5.46271	4.6893e-08	1.34055e-06	25.6996	31.5188	24.7536	36.0749	37.1279	27.4955	6.49105	12.5286	15.5104	13.0293	8.37959	7.38
ENSGALG00000038848	MSX2	-2.83791	0.903025	-3.14267	0.00167417	0.00979826	0.0514955	0.173653	0.165301	0.136196	0.107858	0.206742	0.0208575	0.0266608	0	0.0524878	0.0277391	0
ENSGALG00000038884	SRL	4.83565	0.564489	8.56643	1.06746e-17	2.11458e-15	0.109513	0.10521	0.0579644	0.215643	0.147184	0.656704	2.8857	7.03029	11.621	4.55849	8.94981	6.18966
ENSGALG00000038969	HIST2H3A	-1.16498	0.343891	-3.38765	0.000704949	0.00487548	1.56552	3.2678	2.70839	1.26648	1.9143	1.77553	0.474632	0.534762	0.692497	1.40891	0.827885	1.09544
ENSGALG00000038995	GRIA4	-1.47635	0.488358	-3.02309	0.0025021	0.0135144	0.404301	0.479334	0.734956	0.306429	0.10842	0.348813	0.12099	0.0851506	0.252295	0.0914169	0.0577839	0.22137
ENSGALG00000039022	PDE1B	1.42613	0.529353	2.6941	0.00705784	0.0297919	0.376833	0.425037	0.0366033	0.364611	0.125582	0.241236	1.05608	0.742929	0.30122	0.515236	0.111375	0.966362
ENSGALG00000039092	STAC	1.50669	0.383896	3.92474	8.68239e-05	0.000861349	0.338073	0.328251	0.492201	0.230775	0.169764	0.546481	1.67069	0.497643	0.704219	0.329025	0.768019	1.38925
ENSGALG00000039120	NBEAL2	-1.15328	0.236203	-4.8826	1.04698e-06	1.99649e-05	13.0427	16.1874	17.5426	15.4258	18.6286	37.6566	5.22336	6.54846	12.6255	8.46269	6.35548	7.95813
ENSGALG00000039145	CA8	-2.64851	0.369694	-7.16405	7.83288e-13	6.5945e-11	1.43891	1.41316	1.32762	0.652014	1.82908	0.636329	0.285757	0.244486	0.195662	0.362349	0.208767	0.0930853
ENSGALG00000039170	LHFPL5	1.03551	0.168185	6.15693	7.41664e-10	3.3125e-08	28.3577	39.2281	37.7742	25.4218	33.0425	28.2818	57.4188	76.1874	62.7092	56.7747	44.3514	59.3343
ENSGALG00000039196	NECTIN1	1.10876	0.194772	5.69259	1.2513e-08	4.20545e-07	11.9153	13.6625	13.2143	12.8041	11.8268	9.10939	19.384	32.9018	23.5036	26.6875	17.8346	18.5222
ENSGALG00000039209	WIF1	-2.1499	0.379806	-5.66052	1.50911e-08	4.9533e-07	162.917	125.488	121.614	123.407	117.191	53.9483	16.7494	27.993	21.7939	53.7998	15.2914	9.63248
ENSGALG00000039239	SERPIND1	1.25205	0.423637	2.95548	0.0031218	0.0160504	0.186838	0.113621	0.240135	0.0983764	0.115824	0.215801	0.516064	0.835438	0.945567	0.201335	0.360484	0.40607
ENSGALG00000039299	LASP1	1.11699	0.174889	6.38685	1.69333e-10	8.4606e-09	60.8737	64.1719	51.918	60.3646	68.3849	50.813	136.851	114.018	89.6053	85.6628	152.359	129.223
ENSGALG00000039322	DDR2	1.01439	0.23298	4.35397	1.33696e-05	0.000177189	5.66866	5.29372	5.08356	6.29768	6.95094	4.29278	14.0377	7.95029	9.03927	6.02732	15.02	10.3782
ENSGALG00000039436	DLX2	-2.9291	1.16629	-2.51148	0.0120227	0.0445214	0	0.323933	0.121429	0.199666	0	1.79093	0	0	0.439209	0	0.126535	0.227054
ENSGALG00000039468	SCHIP1	1.06926	0.146432	7.30212	2.83267e-13	2.69472e-11	11.3027	10.2316	8.33768	13.3696	12.4854	13.2957	24.4736	25.4336	20.0749	14.9854	24.7373	21.7225
ENSGALG00000039497	TFAP2E	-4.78264	1.61317	-2.96475	0.00302933	0.015661	0	0.0310343	0	0	0	0.235078	0	0	0	0	0	0
ENSGALG00000039553	SULF1	2.85687	0.291108	9.81381	9.81897e-23	3.37412e-20	5.51033	3.11477	2.08521	4.86601	2.55624	2.02932	23.4129	22.9382	12.9017	19.244	24.7856	27.0163
ENSGALG00000039554	LPO	-2.09995	0.758604	-2.76818	0.00563698	0.0250172	1.48134	0.716704	1.12568	1.52484	1.98903	12.9688	0.311777	0.159534	2.98377	0.22266	0.342044	0.484416
ENSGALG00000039571	PRPH	-1.05141	0.298479	-3.52256	0.000427396	0.00320414	11.4246	26.0213	22.8076	18.5408	26.652	15.6694	5.20721	8.7011	16.027	8.9352	7.22608	3.84979
ENSGALG00000039629	HOXD11	-4.70806	1.68071	-2.80123	0.0050908	0.0231861	0	0	0.138158	0.284822	0	0.917213	0	0	0	0	0	0
ENSGALG00000039708	PRAM1	1.08791	0.370379	2.93728	0.00331101	0.0168025	0.508307	0.392925	0.914646	0.305521	0.270144	1.0107	0.601621	0.890279	0.564658	1.42143	1.33546	0.778404
ENSGALG00000039741	TNFRSF8	1.60423	0.456846	3.51153	0.000445543	0.00332538	3.95347	3.14613	12.7516	5.5584	3.40075	0.74369	11.4685	17.7712	17.6423	14.8298	12.195	9.73348
ENSGALG00000039756	NKAIN2	-1.1046	0.21569	-5.12124	3.03535e-07	6.83278e-06	6.54385	10.7811	8.11261	6.64563	6.09676	10.3313	3.18341	4.70028	5.34125	1.7127	3.28245	2.91172
ENSGALG00000039772	RGS7	-2.23279	0.564812	-3.95315	7.71276e-05	0.000776719	0.48233	2.64356	0.337289	0.490666	0.361506	0.807497	0.11943	0.242403	0.18883	0.205155	0.143564	0.0730879
ENSGALG00000039872	PDLIM4	1.6402	0.236407	6.93806	3.97525e-12	2.91023e-10	19.0705	14.7951	11.9689	13.2949	17.882	17.5187	67.2793	66.7038	41.3058	29.873	34.2807	35.9906
ENSGALG00000039895	EPHA2	1.56943	0.247163	6.34978	2.15616e-10	1.04929e-08	3.238	3.59107	2.80172	1.7993	2.84299	3.54716	10.389	8.96018	6.97613	3.99549	8.96829	10.1122
ENSGALG00000039985	CDH11	1.03028	0.282812	3.64299	0.000269491	0.00220597	56.9838	45.8267	54.9087	39.0954	62.2311	28.9614	113.16	67.0104	78.026	40.3318	137.953	98.985
ENSGALG00000039990	TNC	1.77112	0.422149	4.19547	2.72302e-05	0.000320407	5.8138	4.71459	9.02773	0.906989	4.27161	7.11877	19.7171	10.0685	28.4111	6.9112	12.7045	20.8214
ENSGALG00000040002	CD244	1.08735	0.411289	2.64376	0.00819909	0.0333469	0.394367	0.306452	0.250309	0.172771	0.285918	0.237525	0.584245	1.03902	0.19589	0.472916	0.541818	0.594803
ENSGALG00000040010	-	-2.38661	0.96255	-2.47947	0.0131578	0.0476763	0.750568	0.384257	1.44027	0.199198	0.618574	5.94253	0.0475249	0.0835705	1.07296	0	0.0756944	0.302978
ENSGALG00000040023	MAPK11	1.02939	0.141562	7.27168	3.55054e-13	3.24913e-11	5.64936	7.39394	7.02797	8.31521	5.55013	5.62836	12.0576	14.4554	10.9776	9.57887	11.3215	15.0765
ENSGALG00000040045	DBH	-2.11261	0.857481	-2.46374	0.0137494	0.0491848	0	0	0	0	0	0.0738475	0	0	0	0	0.0262235	0
ENSGALG00000040136	PSTPIP2	1.22072	0.440408	2.7718	0.00557475	0.0247999	0.306465	0.374027	0.318045	0.452057	0.267265	0.467323	0.378319	1.03728	0.34144	1.90813	0.468812	0.775214
ENSGALG00000040269	-	-1.0512	0.403603	-2.60453	0.00920005	0.0364208	0.673488	0.407226	0.269937	0.588566	0.88297	0.0861997	0.487659	0.520048	0.332525	0.251753	0.181074	0.426454
ENSGALG00000040369	PFKFB3	1.20635	0.206676	5.83688	5.31859e-09	1.95108e-07	17.0039	19.1109	11.9608	16.9257	10.9492	12.0678	27.2059	41.2301	24.1139	33.8706	30.1342	23.5357
ENSGALG00000040397	HAUS1	-1.02437	0.200083	-5.11974	3.05956e-07	6.8781e-06	12.625	15.5296	14.6487	15.4082	20.6895	25.1852	6.2042	8.09375	12.0813	4.98675	7.66548	6.98848
ENSGALG00000040418	DGAT2	-1.61938	0.35371	-4.57828	4.68807e-06	7.30228e-05	34.555	38.4675	36.7705	42.9908	33.2763	105.66	8.63934	11.7443	33.4674	13.8138	6.96343	12.2446
ENSGALG00000040432	PAPPA2	1.2401	0.320977	3.8635	0.000111772	0.00106268	0.588433	0.402612	0.470654	0.272887	0.372871	0.414607	2.38258	1.029	0.740695	0.755641	2.12806	2.80193
ENSGALG00000040444	SEMA3C	1.11727	0.286354	3.90169	9.55247e-05	0.000929737	17.2408	22.3768	15.6974	10.0598	10.4715	6.72754	20.1163	42.7446	36.6518	21.7339	18.382	27.005
ENSGALG00000040447	CDCP1	-1.31011	0.446263	-2.93574	0.00332752	0.016871	2.27225	2.98998	2.92216	2.8921	3.97317	11.4444	0.95839	1.31159	4.49424	1.19394	1.10142	0.999465
ENSGALG00000040463	CABP7	-1.39624	0.317278	-4.40067	1.07919e-05	0.000146781	2.07624	1.13179	2.21486	1.28965	2.5986	1.19315	0.44342	0.774946	0.825237	0.104012	1.22022	0.838444
ENSGALG00000040541	SLC5A6	1.17997	0.274288	4.30195	1.69303e-05	0.000214179	58.2462	45.8419	40.5513	63.7346	54.3798	26.5783	97.9866	158.298	73.0046	103.465	80.6649	92.675
ENSGALG00000040582	LMX1B	-2.45339	0.996997	-2.46078	0.0138634	0.0494455	0.11614	0.312618	0.341328	0.119997	0.30704	1.79658	0	0.0716916	0.433923	0	0.0235688	0.0456933
ENSGALG00000040648	RGS11	-1.2706	0.33084	-3.84052	0.000122772	0.00115274	2.65072	3.57445	2.60309	1.23269	4.55893	8.57892	1.16187	0.917213	2.79467	0.672506	1.22361	0.803899
ENSGALG00000040672	IGFBP4	1.26415	0.286321	4.41515	1.00938e-05	0.000138855	145.595	172.501	134.558	229.383	147.524	109.239	286.656	497.322	207.657	498.982	236.084	304.934
ENSGALG00000040754	CYP1C1	1.24758	0.486063	2.56669	0.0102673	0.0396086	0.496323	0.22025	0.373789	0.342414	0.61576	0.395892	0.54975	1.22042	0.987815	0.196991	1.42621	0.907569
ENSGALG00000040768	MAL2	-1.37686	0.476404	-2.89011	0.00385111	0.0188284	1.17878	1.57897	1.49565	1.10725	1.30422	4.41334	0.396163	0.557897	1.95324	0.462423	0.375173	0.335346
ENSGALG00000040898	-	-6.01379	1.58115	-3.80344	0.000142702	0.00131302	0	0	0.0391383	0	0	0	0	0	0	0	0	0
ENSGALG00000040899	GPAT2	-1.08762	0.223642	-4.86322	1.15494e-06	2.1784e-05	7.39882	5.65581	7.12049	6.70003	5.33489	10.8674	3.11391	1.90665	4.55272	3.66719	1.64301	2.62253
ENSGALG00000040923	AK8	-1.09354	0.394884	-2.76927	0.00561826	0.0249473	0.452991	0.936563	0.251241	0.695718	0.852863	0.975421	0.283733	0.413279	0.240353	0.148115	0.363248	0.178693
ENSGALG00000041143	UMOD	2.72004	0.401685	6.77159	1.27378e-11	8.18621e-10	33.9747	12.2296	9.73776	30.9427	21.6096	7.46746	127.575	140.025	60.1674	158.594	60.1863	130.463
ENSGALG00000041236	CBX7	-1.29687	0.522836	-2.48045	0.0131215	0.0475652	1.12691	0.76229	0.39999	0.169218	0.390637	3.17586	0.489699	0.20854	0.954365	0.368584	0	0.18963
ENSGALG00000041255	ADAM12	1.77265	0.194058	9.13462	6.56355e-20	1.6745e-17	4.40967	2.38511	2.27213	3.42157	3.31858	2.86535	11.5317	10.0935	8.55516	7.71249	10.808	11.0663
ENSGALG00000041266	CNN1	1.557	0.483227	3.2221	0.00127256	0.00789512	3.28266	7.71849	8.16029	1.44665	3.22226	19.899	10.5352	12.986	29.7119	11.7381	10.5441	34.1507
ENSGALG00000041344	FABP5	2.10972	0.679183	3.10626	0.00189469	0.0108402	1.87519	2.2485	6.61512	12.3369	2.68573	10.5723	3.76967	15.3629	17.759	57.0121	10.4173	33.4403
ENSGALG00000041372	-	-1.72013	0.529117	-3.25095	0.00115021	0.0072919	0.960227	1.50291	1.93832	1.739	1.44833	5.39268	0.578871	0.372349	1.74366	0.302794	0.309465	0.421041
ENSGALG00000041400	AADACL3A	1.0336	0.420532	2.45785	0.0139773	0.0497568	0.835161	0.492965	0.907119	0.556895	0.587295	0.241137	0.744346	1.80941	1.62549	0.815604	1.13219	0.466804
ENSGALG00000041407	LOC420748	-2.0898	0.831282	-2.51395	0.0119388	0.0443079	8.64705	12.2258	30.5185	8.41476	17.0324	82.5165	1.17032	1.93333	25.8862	1.48611	1.61476	3.30589
ENSGALG00000041456	SLC35G1	-1.02289	0.175373	-5.83268	5.45447e-09	1.9918e-07	32.5975	20.9799	23.4226	21.275	25.9245	32.9988	11.0812	9.63553	16.8899	9.05246	10.2744	12.1991
ENSGALG00000041491	ACKR4	1.25126	0.283307	4.41662	1.00255e-05	0.000138029	20.8292	23.5326	19.3026	17.3685	25.9818	17.3626	46.3788	34.7949	35.1527	18.1513	67.5579	65.3338
ENSGALG00000041555	COL1A1	1.62748	0.239963	6.78219	1.18366e-11	7.75507e-10	949.672	984.765	1252.35	968.453	1167.57	803.991	4475.81	1890.42	2542.94	1608.97	3372.13	3083.2
ENSGALG00000041575	PPP1R14C	-1.64407	0.375945	-4.37317	1.22454e-05	0.000164162	2.96276	4.1221	3.3684	2.0488	6.77357	3.86562	0.481008	1.42242	1.84899	0.158397	1.63672	1.18774
ENSGALG00000041604	NPTXR	1.17992	0.21853	5.39936	6.68783e-08	1.81458e-06	2.34849	4.26357	4.46467	4.22762	5.08366	2.66092	6.54271	7.01852	9.15341	6.15524	10.6472	7.63328
ENSGALG00000041634	ACTG2	2.19467	0.230926	9.50375	2.02467e-21	6.19843e-19	131.076	175.266	177.486	116.661	133.536	278.536	738.836	540.467	857.677	381.846	667.747	934.914
ENSGALG00000041680	KCNT2	1.12149	0.404008	2.77592	0.00550459	0.0245852	0.26298	0.317592	0.270444	0.264687	0.0654537	0.0602448	0.374396	0.523733	0.746962	1.322	0.446797	0.479085
ENSGALG00000041708	WNT4	1.27043	0.227923	5.57395	2.49028e-08	7.72216e-07	92.6032	124.957	87.6976	126.906	116.961	238.288	212.516	390.414	237.557	291.658	231.609	266.942
ENSGALG00000041755	-	-1.3031	0.315513	-4.13009	3.62624e-05	0.000407601	0.357816	0.402796	0.351125	0.280431	0.255596	0.601905	0.119963	0.0364326	0.139173	0.206427	0.143229	0.163225
ENSGALG00000041775	ESRRB	3.36232	0.399139	8.42393	3.64051e-17	6.3853e-15	0.703383	0.783271	0.350836	0.575873	0.455244	1.83869	5.40523	15.1151	5.76392	5.37064	6.73424	6.66716
ENSGALG00000041826	S100A6	1.69687	0.181112	9.36913	7.31297e-21	2.12303e-18	180.195	194.657	182.431	142.151	185.661	156.46	402.165	633.281	453.017	496.499	455.083	572.676
ENSGALG00000041834	AEBP1	1.26138	0.167539	7.52891	5.11668e-14	5.63103e-12	38.1545	38.2006	49.5299	37.1422	35.5561	30.6803	109.418	65.7841	73.915	70.668	85.979	88.6216
ENSGALG00000041932	SLC5A5	4.88573	0.572374	8.53591	1.39052e-17	2.6015e-15	1.8279	1.62047	0.150106	1.5983	0.566495	0.226458	25.9359	63.6495	21.9835	22.5614	22.6565	21.867
ENSGALG00000041939	FAM222B	-1.0457	0.224092	-4.66639	3.06541e-06	5.11044e-05	20.459	24.6331	25.0405	26.0748	28.4606	55.7602	10.9918	12.1855	20.9874	9.44047	11.525	12.4847
ENSGALG00000041965	MIOX	3.32355	0.431784	7.69725	1.3902e-14	1.70863e-12	0.263475	0	0.140915	0.238713	0.137988	0	1.97299	1.83379	1.58085	1.61451	0.565549	0.868332
ENSGALG00000041978	K123	1.20062	0.363291	3.30484	0.000950317	0.0061973	0.0993261	0.0936793	0.164874	0.141064	0.0807085	0.150468	0.153783	0.41186	0.221423	0.331509	0.15974	0.284454
ENSGALG00000042045	-	-3.11743	0.871567	-3.57681	0.000347813	0.00271636	0.581815	0.140601	0.428329	0.0895343	0.367677	4.24074	0.119131	0	0.0478895	0.102876	0.109368	0.0491994
ENSGALG00000042123	CLDN23	-2.01544	0.476332	-4.23116	2.32492e-05	0.000278825	1.50158	1.9689	4.50854	1.71579	2.16652	7.60241	0.180003	0.66462	1.58911	0.324452	0.473652	0.658262
ENSGALG00000042177	GPR182	1.01121	0.307788	3.28543	0.00101828	0.00656427	0.604673	0.774813	0.866833	0.832589	0.3559	0.676343	1.32132	1.51464	1.3941	0.619676	0.808131	0.887476
ENSGALG00000042458	ACTN1	1.27796	0.208927	6.11676	9.54987e-10	4.10206e-08	43.4825	41.0458	47.045	37.3253	48.1672	42.2591	106.163	71.4418	90.8184	51.347	131.951	116.973
ENSGALG00000042534	NFATC1	1.48926	0.263746	5.64656	1.63691e-08	5.33119e-07	2.43434	2.33892	2.67134	0.624924	2.14804	2.28338	4.60594	5.91877	5.75017	3.81778	5.75108	6.73951
ENSGALG00000042554	ABCD2	1.01182	0.153851	6.57662	4.81258e-11	2.65686e-09	5.54438	7.22289	6.50008	6.03825	5.91476	6.84289	11.1574	12.9972	10.4506	16.0452	10.1057	9.51974
ENSGALG00000042588	-	1.09625	0.363397	3.01668	0.0025556	0.0137173	0.146487	0.247324	0.266641	0.154158	0.184845	0.381143	0.456698	0.154457	0.546335	0.249381	0.484132	0.362095
ENSGALG00000042607	RSPO3	2.08364	0.310801	6.7041	2.02654e-11	1.21868e-09	2.44436	1.48793	5.15528	1.68755	2.42973	3.30314	6.98079	8.46818	8.78709	11.4062	9.0529	11.4015
ENSGALG00000042624	CEP85	-1.1385	0.366546	-3.10601	0.0018963	0.0108441	5.94984	9.24621	9.81873	9.74943	11.0592	29.5103	2.86004	3.49535	12.4388	3.70216	4.28883	3.8057
ENSGALG00000042647	-	1.21653	0.408992	2.97445	0.00293511	0.0152865	0.228087	0.329637	0.242367	0.272741	0.0674931	0.193611	0.514632	0.357303	0.322608	0.5781	0.293562	0.522488
ENSGALG00000042679	FAM134B	-1.63953	0.409806	-4.00075	6.31417e-05	0.000655071	2.91948	3.97154	4.58515	4.21965	6.11177	12.0399	1.20966	0.924274	4.85774	0.911966	0.858438	1.15019
ENSGALG00000042705	KCNK3	1.40254	0.347762	4.03305	5.50587e-05	0.000583435	3.34647	1.71989	4.60024	2.66456	4.23636	2.65178	12.8158	4.87019	5.69525	2.38932	12.7632	9.65854
ENSGALG00000042773	VOPP1	-1.19109	0.247711	-4.8084	1.52143e-06	2.76054e-05	11.5298	10.5175	11.747	14.2549	13.0627	23.2831	4.8188	5.21147	9.01692	6.79542	3.11085	3.67239
ENSGALG00000042836	KCNH2	2.27643	0.21477	10.5994	3.00038e-26	1.42528e-23	4.65743	5.96507	4.3638	8.29518	7.22133	4.36364	24.9044	28.0842	19.0949	24.7963	21.1422	32.5314
ENSGALG00000042929	LOC107049146	1.91655	0.223773	8.5647	1.08355e-17	2.1215e-15	3.6897	4.04232	2.39756	3.28313	4.94883	4.42415	13.8591	17.8791	9.76784	11.2785	12.98	13.8802
ENSGALG00000042944	LOC101748650	1.75616	0.471583	3.72396	0.000196119	0.00169433	0.354268	0	0.779913	0.656462	2.29837	0.787791	0.635359	1.16097	0.356976	1.06129	2.76557	1.09384
ENSGALG00000043064	EXFABP	1.33016	0.526982	2.52411	0.0115992	0.0434306	4.48321	5.2091	7.26729	27.2127	5.11698	13.5028	9.23451	17.8338	11.997	65.7819	13.8305	22.5582
ENSGALG00000043118	ATP10A	1.06421	0.111137	9.57564	1.01229e-21	3.27788e-19	9.77087	9.74166	12.3299	7.66171	9.49556	9.63868	19.9139	19.0619	18.8147	16.7223	18.8019	16.9358
ENSGALG00000043190	-	-1.03993	0.42164	-2.46639	0.0136482	0.0489198	0.188852	0.348293	0.22301	0.238372	0.186643	0.427224	0.060206	0.0897715	0.145645	0.21307	0.0261013	0.0828643
ENSGALG00000043198	SPEG	1.06725	0.235888	4.52439	6.0569e-06	9.08968e-05	0.660231	0.447257	0.682837	0.386273	0.522284	0.546818	1.4812	0.564349	1.13189	0.627593	1.26073	1.35486
ENSGALG00000043213	CYP26C1	2.22035	0.516855	4.29589	1.73996e-05	0.000219457	0.0358469	0.0691425	0.0385174	0.0316354	0.0754433	0.0728553	0.206685	0.223151	0.035589	0.291062	0.0776197	0.836481
ENSGALG00000043283	LGI2	-1.2042	0.281651	-4.27549	1.90714e-05	0.000236817	1.36879	1.90351	1.77636	2.33869	2.57157	4.85025	0.756288	1.01618	1.52877	0.762184	0.847683	0.917047
ENSGALG00000043287	CAV1	1.03849	0.336306	3.08794	0.00201552	0.0113845	32.2532	55.3143	59.4237	9.12851	31.128	41.2952	43.2331	91.4039	91.7161	51.3784	62.3838	81.1541
ENSGALG00000043389	-	1.92198	0.242332	7.93119	2.1705e-15	3.04557e-13	0.0987817	0.189802	0.140891	0.131957	0.103393	0.150614	0.321944	0.360124	0.261176	0.304534	0.338196	0.446908
ENSGALG00000043433	SCX	1.41929	0.350991	4.04368	5.26193e-05	0.000559699	1.80434	1.97768	1.69847	1.568	1.29815	1.7376	5.11711	3.59472	5.76678	2.02442	5.25754	4.38336
ENSGALG00000043448	ABLIM2	-1.27081	0.248782	-5.10815	3.25327e-07	7.25545e-06	2.23682	2.30548	2.38574	2.90845	2.75503	3.78166	0.743754	0.86373	1.79364	0.89515	0.534798	1.28588
ENSGALG00000043650	GFI1	-2.26082	0.787631	-2.8704	0.00409952	0.0196828	0.43134	0.788461	0.0932034	1.0253	0.548603	5.1503	0.0718026	0.0887082	0.900939	0.218008	0.190218	0.0438811
ENSGALG00000043690	C1H2ORF40	1.5344	0.231345	6.63251	3.30015e-11	1.91614e-09	6.97324	9.66837	10.6274	14.7724	5.27275	10.4001	32.2003	26.9574	22.1033	21.1366	21.5071	30.3476
ENSGALG00000043725	PIEZO1	1.06209	0.160862	6.6025	4.04284e-11	2.28434e-09	4.25435	5.37588	7.74182	4.56509	4.10116	4.99216	9.00081	9.41309	10.8364	11.2044	8.13402	10.6503
ENSGALG00000043734	LIPG	-1.08107	0.180928	-5.97513	2.29909e-09	9.04488e-08	50.6578	32.9831	28.7507	36.903	37.687	39.4614	14.6436	23.1207	16.858	13.0194	14.0617	16.0039
ENSGALG00000043756	PEX11G	-1.00891	0.207476	-4.86277	1.15756e-06	2.18021e-05	8.17749	9.34352	9.48735	9.35513	7.89014	14.6676	3.35745	3.57279	7.04734	5.67568	2.76607	3.46923
ENSGALG00000043839	SPACA1	-2.46213	0.79908	-3.0812	0.00206167	0.0116024	0.0566884	0.165131	0.288749	0.430802	0.167701	0.158481	0	0	0.224815	0.218218	0	0.0547916
ENSGALG00000043909	MSMB	2.14941	0.586667	3.66377	0.000248531	0.00206165	0.422969	3.93032	1.92549	0.291073	1.18458	0.56316	1.59053	8.07741	6.93382	7.14479	3.40303	5.3724
ENSGALG00000043964	SPINK4	3.01716	0.505381	5.97006	2.37169e-09	9.30876e-08	0	0.181428	0.192726	0.487249	0.189006	0	3.05684	6.06521	3.62744	3.01737	5.34481	0.727829
ENSGALG00000044447	-	-2.37286	0.941611	-2.52	0.0117355	0.0438008	0.116578	0.986715	0.304771	0.558365	0.7128	6.52857	0	0.189068	1.17815	0	0	0.11612
ENSGALG00000044618	SLC51B	1.93438	0.542144	3.56802	0.000359683	0.00279351	0.0658461	0.192961	0.104045	0.141978	0.13476	0.225176	0.235567	0.209253	0.725778	0.0960752	0.805763	0.883421
ENSGALG00000044632	PLIN3	-1.64862	0.358724	-4.59579	4.31103e-06	6.77138e-05	9.39137	9.17196	9.61947	10.9747	11.7857	28.5749	1.95577	2.67804	8.47663	5.13894	2.69903	2.40627
ENSGALG00000044641	-	-1.12374	0.307276	-3.65709	0.000255095	0.00210657	24.7148	25.9239	31.597	27.5506	27.3422	55.146	9.64116	13.1891	28.9545	13.1784	7.78349	10.4035
ENSGALG00000044649	P2RX2	2.8504	0.346601	8.22387	1.97045e-16	3.25279e-14	1.61632	1.8496	0.984408	2.5078	1.88086	0.562197	6.80759	8.6605	5.93374	15.1476	7.14546	10.02
ENSGALG00000044739	-	1.92744	0.638922	3.0167	0.00255542	0.0137173	0.0494847	0.213342	0.182156	0.0422646	0.202637	0.120703	0.179473	0.181006	0.269677	1.33817	0.232534	0.518962
ENSGALG00000044889	C8H1orf168	-2.23012	0.80181	-2.78136	0.00541322	0.0242737	0.533469	0.816575	1.28062	0.703894	1.32205	7.01868	0.0864094	0.133267	1.89127	0.151902	0.0973228	0.205256
ENSGALG00000044940	-	-2.37969	0.894309	-2.66093	0.00779258	0.0321282	1.5639	0.642124	1.41525	4.02281	0.337214	1.84053	0.0749462	0.135473	0.396459	1.11149	0.0508734	0.0456179
ENSGALG00000045127	-	-2.06929	0.401877	-5.14906	2.61795e-07	6.02199e-06	2.91548	2.64954	2.33281	1.55488	3.37097	8.12903	0.264977	0.554015	1.14154	0.517277	0.558952	0.421971
ENSGALG00000045235	-	-3.19203	0.771962	-4.13496	3.55019e-05	0.000401876	0.913716	0.529132	0.907649	0.720226	1.0422	0.184788	0	0.0639383	0.132643	0.363471	0.0304409	0
ENSGALG00000045327	-	1.46645	0.547668	2.67763	0.00741457	0.030987	2.32484	8.25973	1.40974	3.46699	5.47693	1.55348	4.98242	33.8742	2.34132	9.08649	13.4374	5.24586
ENSGALG00000045458	-	-1.41729	0.47635	-2.97531	0.00292693	0.0152487	0.176269	0.354186	0.107852	0.12548	0.410203	0.496795	0.0659045	0.251493	0.149525	0.0988933	0.151018	0.166995
ENSGALG00000045548	-	-1.4002	0.173742	-8.05909	7.68656e-16	1.14537e-13	119.959	101.301	123.458	91.6111	99.5978	95.1982	37.4812	22.2651	32.0493	39.9445	43.8938	36.6658
ENSGALG00000045608	FAM178B	-3.20975	1.01497	-3.16241	0.00156467	0.00928747	0	0.017408	0.14405	0.130374	0.0988484	0.337177	0	0	0.0583066	0.0186864	0.0403596	0.0297499
ENSGALG00000045671	LOC416755	1.4234	0.284389	5.00511	5.5831e-07	1.16059e-05	4.13646	2.38863	5.03944	4.90841	2.71268	4.98823	8.17941	7.25128	7.5036	18.1929	7.0759	9.16933
ENSGALG00000045920	HSD17B3	1.66007	0.361104	4.5972	4.28197e-06	6.74461e-05	3.79643	3.43344	2.59745	3.07929	1.50098	0.764411	5.45581	8.21276	6.13605	11.1505	4.56234	5.43052
ENSGALG00000046030	-	-1.07312	0.434149	-2.47178	0.0134443	0.048381	0.43468	0.216476	0.231129	0.384004	0.528022	1.77119	0.242172	0.156426	0	0.143643	0.152925	0.220157
ENSGALG00000046159	KNG1	3.64627	0.50877	7.16684	7.6749e-13	6.49397e-11	0	0.0409795	0.0144213	0.0236864	0.0139074	0.0128317	0.221116	0.309648	0.111453	0.637416	0.214941	0.556983
ENSGALG00000046180	TDRD1	-1.56661	0.532596	-2.94145	0.00326677	0.0166281	2.57111	1.96953	3.48392	2.73421	3.35712	14.486	0.624483	0.850035	4.97202	0.818334	0.722099	1.02956
ENSGALG00000046188	CDC20B	-1.94704	0.543468	-3.58263	0.000340152	0.00267265	0.378542	0.4791	0.272045	0.189666	0.375586	0.707504	0.0585749	0.0399202	0.301049	0.072146	0.0738212	0.0733481
ENSGALG00000046210	-	-1.02032	0.160347	-6.36321	1.97577e-10	9.72749e-09	1.92265	2.30198	1.67264	2.57834	1.54623	1.87653	0.927502	0.972853	1.13376	1.13765	0.636167	0.805117
ENSGALG00000046679	LOC107054063	-2.40834	0.803218	-2.99837	0.00271432	0.0143632	0.49624	2.84956	1.95559	2.07912	4.87023	14.3788	0.0903961	0.605373	2.8815	0.390959	0.523246	0.270202
ENSGALG00000046712	LOC396224	1.08945	0.146669	7.42796	1.10285e-13	1.11197e-11	19.5274	21.4646	23.8219	16.1272	21.8243	19.166	47.8587	38.0835	35.4635	24.4223	44.9683	39.3245
ENSGALG00000046715	-	1.6388	0.438812	3.73462	0.000188001	0.00164019	205.624	118.763	47.939	88.1395	131.608	50.611	415.194	527.517	82.9673	202.331	346.029	237.966
ENSGALG00000046762	-	-4.28437	1.34818	-3.17789	0.00148349	0.00888935	0	0.0577655	0.548998	0.09794	0.889895	2.70045	0	0	0.119278	0.0559908	0	0.116849
ENSGALG00000046774	-	-1.98103	0.390398	-5.07437	3.88787e-07	8.46881e-06	2.9823	4.38952	6.47397	7.64241	6.74004	9.04328	0.515272	1.11639	4.04182	1.35048	0.937482	0.918123
ENSGALG00000046799	-	-3.0561	1.24228	-2.46008	0.0138906	0.0495215	0	0.127881	0.100638	0	0.129933	0.576074	0	0	0.0649713	0	0.0631965	0
ENSGALG00000046810	-	-1.95006	0.376442	-5.18023	2.21609e-07	5.24818e-06	0.484381	0.434171	0.643257	0.446067	0.364038	0.724135	0.213373	0.0361458	0.120029	0.0985806	0.118832	0.0677312
ENSGALG00000046817	-	1.15087	0.284995	4.03822	5.38578e-05	0.00057179	10.6971	8.47078	8.86996	6.86127	8.27515	4.1476	23.8229	10.753	16.9817	7.78603	18.2534	16.6491
ENSGALG00000046823	SNX22	-2.15187	0.367234	-5.85967	4.63792e-09	1.72012e-07	41.8761	33.8004	52.2096	51.2932	45.5123	64.7584	4.16805	6.3152	21.6669	13.3805	4.80061	8.57183
ENSGALG00000046838	-	-1.95207	0.757038	-2.57857	0.00992107	0.0386245	0.0441642	0.128701	0	0.110427	0.445404	0.743507	0.102587	0	0.132282	0.0422719	0.0872883	0.0863136
ENSGALG00000046886	-	-1.5796	0.517372	-3.05313	0.00226469	0.012474	0.365877	0.270396	0.240062	0.280538	0.351574	0.171488	0.10774	0.0497116	0.13871	0.0454747	0.17015	0.226165
ENSGALG00000046906	-	-2.71216	1.05575	-2.56894	0.010201	0.0394406	0	0	0	0	0.0674427	0	0	0	0.0335927	0.0322897	0	0
ENSGALG00000046935	-	-3.79362	1.24486	-3.04744	0.00230802	0.0126629	0.0397974	0.0579044	0	0.0326131	0.118054	1.19577	0	0.0210184	0.0397218	0.0187409	0.0191985	0.0387561
ENSGALG00000046955	-	-1.32363	0.363189	-3.64447	0.000267943	0.00219593	0.63117	1.04332	0.567701	0.826382	0.530252	1.97292	0.220586	0.235219	0.321689	0.513697	0.200569	0.318729
ENSGALG00000046973	-	-3.38868	0.972848	-3.48325	0.00049536	0.00363436	0.181308	0	0.090898	0.588897	0.52817	5.85721	0	0	0	0	0.25899	0.190527
ENSGALG00000047057	-	-2.21714	0.790064	-2.80628	0.00501168	0.0229249	0.688332	1.58496	0.972359	1.23843	1.60791	7.31665	0.184988	0.0825241	2.64186	0.143489	0.155373	0.0765945
ENSGALG00000047107	LOC107053121	3.51708	1.18352	2.97171	0.0029615	0.0153812	0	0.0191855	0	0.0162982	0.0196179	0	0.0298492	0.04145	0.12643	0	0.189014	0.134348
ENSGALG00000047108	-	2.30575	0.326444	7.06324	1.62669e-12	1.26807e-10	0.125591	0.0912347	0.161272	0.181292	0.218596	0.0858006	0.359533	0.461613	0.592768	0.624428	0.485437	0.551349
ENSGALG00000047110	-	1.81362	0.657815	2.75704	0.00583267	0.0257163	0	0	0	0.0386909	0.0456248	0.214396	0	0	0	0.0439956	0.0446437	0
ENSGALG00000047124	-	-2.99196	1.14497	-2.61314	0.00897143	0.0356949	0.235494	0.229797	0.328706	0.0339107	0.560698	2.977	0.21843	0.0836695	0.118536	0	0	0.0393693
ENSGALG00000047132	LOC112529929	-3.18418	0.986963	-3.22624	0.00125427	0.00780922	0.0877635	0.126443	0.323115	0.0773908	0.0225062	0.742349	0	0.0454221	0.108046	0.0221251	0	0
ENSGALG00000047141	-	-1.56223	0.50994	-3.06355	0.00218725	0.0121188	5.53428	6.71176	11.5803	5.99145	8.16085	27.1434	1.39404	1.84491	11.7311	2.78424	1.37615	2.02632
ENSGALG00000047182	ACHE	1.75358	0.5765	3.04176	0.002352	0.0128685	1.40339	0.513656	2.13386	3.44778	0.325153	1.28353	3.25147	2.77162	3.89406	12.6618	1.37662	3.38299
ENSGALG00000047265	LOC101750583	-1.36547	0.344671	-3.96166	7.44319e-05	0.000753628	0.991858	0.521156	0.870933	1.24475	0.980553	2.2791	0.364232	0.183912	0.457881	0.528312	0.234903	0.585747
ENSGALG00000047283	DMBT1	1.09103	0.386041	2.82621	0.00471021	0.0218848	3.03009	3.41702	2.96548	2.54039	1.66534	4.11089	3.20994	6.63432	3.07964	14.0842	3.07319	4.96978
ENSGALG00000047320	MFAP5	1.93535	0.211523	9.14961	5.71412e-20	1.48022e-17	7.50187	7.78837	9.45752	6.59524	7.08397	7.11297	36.6216	24.0824	24.9375	14.0027	25.5158	34.0468
ENSGALG00000047383	WISP2	1.20722	0.311003	3.88169	0.000103735	0.000994696	1.78724	1.13091	1.44606	1.14652	1.35342	0.893626	3.92623	2.06414	1.68218	1.8216	4.37246	2.15868
ENSGALG00000047384	-	-3.86899	1.28235	-3.01711	0.00255199	0.0137066	0.187201	0.0912213	0.434014	0.039734	0.468826	2.83649	0.0365411	0	0.233206	0	0	0
ENSGALG00000047472	-	1.73867	0.353239	4.92207	8.56338e-07	1.66555e-05	21.9078	13.6515	8.67723	26.5621	10.6468	15.251	47.8665	49.326	16.0069	68.3734	30.6569	85.9264
ENSGALG00000047488	-	-1.13177	0.190557	-5.93928	2.86277e-09	1.10558e-07	20.1818	18.4637	18.75	16.9442	10.1088	10.4825	3.34346	11.244	6.05715	5.50851	0	0
ENSGALG00000047495	-	4.40306	0.576159	7.6421	2.13709e-14	2.57031e-12	0.439537	0.319204	0	0.584116	0.11622	0	4.92009	6.99967	3.59021	7.51894	1.66991	1.22017
ENSGALG00000047554	GDF7	1.50263	0.564021	2.66413	0.00771867	0.0318859	0.114044	0.275454	0.24882	0.0515031	0.122986	0.0603412	0.336812	0.815919	0.847924	0.177421	0.194859	0.233624
ENSGALG00000047567	-	2.02438	0.579594	3.49277	0.000478046	0.00352269	0.550477	0.081663	0.230099	0.869048	0.494777	0.209836	2.1617	1.03828	0.513926	2.16958	1.26863	1.83529
ENSGALG00000047598	-	-1.20211	0.425831	-2.82297	0.00475805	0.0220281	1.61274	1.81578	2.82487	2.63436	3.14612	5.74841	0.38661	0.664476	3.10286	1.15202	0.564584	0.906006
ENSGALG00000047639	LOC100859804	-1.38275	0.42865	-3.22582	0.00125614	0.00781343	1.02087	0.779023	0.493247	0.576165	0.403977	0.388987	0.142441	0.220198	0.153354	0.449692	0.146207	0.253806
ENSGALG00000047700	-	-2.92124	1.16528	-2.5069	0.0121795	0.0449514	0.103159	0.0809049	0.157614	0	0.385814	2.1446	0.039343	0	0.257873	0	0.0984645	0.149076
ENSGALG00000047702	-	1.00108	0.154735	6.46963	9.82416e-11	5.08982e-09	0.887006	1.0897	1.23666	0.832089	1.33307	1.13303	2.37912	1.92135	1.68224	1.82342	2.06831	2.00156
ENSGALG00000047706	-	-1.67012	0.321766	-5.19048	2.09755e-07	4.99555e-06	3.51001	3.52246	1.87849	4.63206	2.79839	1.50965	0.939573	0.612186	0.602502	1.24343	1.01108	0.652985
ENSGALG00000047709	-	-2.16656	0.866011	-2.50177	0.0123575	0.0454213	0.897485	1.24515	1.46471	0.633828	0.801843	10.7217	0.140485	0.213265	2.6168	0.299769	0.23306	0.182024
ENSGALG00000047710	-	-1.5787	0.475595	-3.31942	0.000902032	0.00596325	0.596406	0.484213	0.921668	0.221454	0.363322	0.426696	0.177326	0	0.39701	0.190085	0.0321305	0.226252
ENSGALG00000047720	KLHDC7A	-1.01749	0.313076	-3.24999	0.0011541	0.00730554	1.50468	2.24141	1.84713	2.38058	1.67861	1.79527	0.952542	0.34021	0.524938	0.855832	1.02431	1.30583
ENSGALG00000047771	PGF	3.94289	0.238247	16.5496	1.6124e-61	1.35748e-57	2.42298	2.49571	2.87151	3.39686	1.90347	3.61722	37.6325	66.831	28.6282	58.8631	36.5127	44.5118
ENSGALG00000047780	-	-3.18015	1.2211	-2.60433	0.00920534	0.0364254	0.0197127	0.0192111	0.0203536	0.0165269	0.158076	0.388605	0.0307912	0.0208565	0.0196382	0	0.0194014	0.019355
ENSGALG00000047844	-	-3.07159	0.979488	-3.13591	0.0017132	0.00998161	0.13299	0.264032	0.342042	0.717235	0.0665631	2.61113	0.10583	0.144388	0.399172	0.0632367	0	0
ENSGALG00000047853	-	-2.56514	0.770905	-3.32744	0.00087647	0.00580795	0	0.194827	0.280978	0.679415	1.07837	3.38892	0.0425054	0.0647282	0.215519	0.257736	0.067744	0.0602136
ENSGALG00000047890	-	1.39735	0.332234	4.20591	2.60033e-05	0.00030769	0	0	0	0	0	0	0	0	0	0	0	0
ENSGALG00000047941	-	3.97059	0.35454	11.1993	4.11083e-29	3.22012e-26	65.441	57.4757	20.5407	31.6556	28.7336	20.56	509.999	818.542	361.362	501.576	377.376	451.913
ENSGALG00000048017	-	-1.7613	0.584779	-3.0119	0.00259617	0.0138952	0.610413	0.68279	1.07075	2.92789	1.62239	10.4799	0.447759	0.35901	1.87451	0.402385	0.464917	0.859684
ENSGALG00000048020	LOC107050518	-1.20575	0.241927	-4.98394	6.23015e-07	1.26542e-05	9.27457	6.40505	6.09795	8.3358	6.75944	4.64459	3.59453	3.62695	1.78429	2.541	2.44741	2.29058
ENSGALG00000048025	-	2.69707	0.784785	3.4367	0.00058884	0.00421336	0.102884	0	0	0.0182774	0.0316271	0	0.0883377	0.195421	0.102416	0.189895	0.023406	0.191157
ENSGALG00000048026	LOC107054264	-1.9879	0.36965	-5.37778	7.5408e-08	2.0218e-06	6.86704	8.1065	13.8596	10.3323	6.08985	4.5914	0.651562	1.36694	3.17716	2.76047	1.15834	0.816077
ENSGALG00000048028	-	-1.84865	0.702878	-2.63012	0.00853557	0.0343586	0.0888776	0.0430189	0.299586	0.266374	0.29094	0.0212854	0.0525445	0.0941058	0.0440765	0.0870117	0.044742	0.0653217
ENSGALG00000048031	-	1.49753	0.411426	3.63986	0.000272787	0.00222538	59.1584	16.9777	24.1158	64.524	30.6065	8.8566	98.1473	64.2681	44.5604	173.69	68.1018	63.0277
ENSGALG00000048035	GCNT2	-1.65154	0.292414	-5.64794	1.62378e-08	5.30897e-07	20.6359	22.8891	26.2895	21.0033	17.1655	25.5104	3.44454	5.81164	13.3568	8.79708	3.7289	4.57515
ENSGALG00000048039	-	-2.74364	1.09163	-2.51335	0.0119591	0.0443471	0.410007	0.317586	0.0422624	0	0.123407	0.0382396	0.0316275	0	0.0814846	0	0	0
ENSGALG00000048062	-	-2.62017	0.54767	-4.78422	1.71655e-06	3.07481e-05	0.298838	0.260056	0.153344	0.196782	0.29683	0.219427	0.0691669	0.0313851	0.0592084	0	0.0290079	0.0582422
ENSGALG00000048066	-	-3.26875	0.593846	-5.50437	3.70499e-08	1.10808e-06	0.381974	0.183854	0.196378	0.0496898	0.238209	0.121954	0.0342407	0	0.142088	0	0	0.0468881
ENSGALG00000048077	-	-1.00907	0.236127	-4.27342	1.925e-05	0.000238157	3.57981	4.59677	4.19817	6.09163	4.62464	5.65847	1.81401	0.650513	3.26175	1.10418	0.845874	2.06185
ENSGALG00000048088	-	-4.14865	1.3102	-3.16643	0.00154321	0.00917545	0.068842	0.0332869	0.0358089	0.0585921	0.312356	2.15308	0.0273741	0	0.170877	0	0	0.0339571
ENSGALG00000048100	-	-1.6686	0.623899	-2.67448	0.00748457	0.0311506	0.0997815	0.0324023	0.138735	0.18919	0.238503	0.426766	0	0.0702855	0.20012	0.0619676	0.0320612	0.0970404
ENSGALG00000048121	-	-1.97378	0.652639	-3.0243	0.00249209	0.0134795	0.633944	0.696096	0.975145	0.720795	1.14359	5.07041	0.121992	0.0608455	1.07906	0.138498	0.151882	0.223969
ENSGALG00000048144	LOC771811	1.19636	0.183092	6.53421	6.3945e-11	3.43995e-09	10.3592	11.8816	9.49468	10.1446	11.9214	8.09739	25.104	24.6625	14.2178	17.7893	22.5115	29.2632
ENSGALG00000048192	-	-1.05445	0.308963	-3.41286	0.000642845	0.00452517	1.07248	1.12735	1.08587	1.13423	0.643433	1.69986	0.523689	0.341061	0.669495	0.596204	0.407774	0.345008
ENSGALG00000048294	-	1.36278	0.328199	4.15231	3.29143e-05	0.000377266	9.44658	7.49663	9.04098	12.8834	9.28716	2.68934	19.4401	15.06	14.9462	27.5508	22.2369	16.3161
ENSGALG00000048377	-	-1.00022	0.187944	-5.3219	1.02687e-07	2.66827e-06	0.346583	0.202287	0.228625	0.123903	0.29761	0	0.0586375	0	0.0708741	0	0.155327	0
ENSGALG00000048514	-	2.04989	0.546993	3.74757	0.000178555	0.00157244	0	0.045227	0.0473481	0.0380047	0.0459667	0.0425765	0.142238	0.247938	0.279152	0.825086	0.0444835	0
ENSGALG00000048528	-	-3.58019	1.3099	-2.73318	0.00627258	0.0271601	0.175851	0.0428154	0.0451811	0.217116	0.395443	0.977764	0	0	0.17609	0	0.129116	0
ENSGALG00000048597	-	-2.79916	1.13045	-2.47615	0.0132809	0.0479572	0.0981132	0.237842	0.134931	0.0807331	0.081562	1.01189	0	0	0.146103	0.042448	0	0.0159478
ENSGALG00000048607	-	1.1408	0.376479	3.03017	0.00244416	0.0132558	0	0.132886	0.14034	0.116629	0.272475	0	0.218899	0	0.133817	0.13002	0.136063	0.132905
ENSGALG00000048648	LOC107053690	-1.54379	0.478133	-3.22878	0.00124317	0.00776142	18.6715	19.0118	37.5901	24.0852	26.9823	88.8973	4.33195	7.87078	34.9712	8.4776	5.5217	7.24325
ENSGALG00000048688	-	-2.91868	1.04874	-2.78303	0.00538545	0.0241878	0.143815	0.211498	0.66915	0.24669	0.571556	3.65845	0.0559406	0	0.286728	0.0697589	0	0.140425
ENSGALG00000048849	-	-1.53258	0.446692	-3.43096	0.000601447	0.00428572	3.74973	2.49683	2.22613	2.42861	3.30191	9.55845	1.09523	1.15784	2.96947	0.363072	1.06926	1.00533
ENSGALG00000048867	-	2.17846	0.795288	2.73921	0.00615874	0.026803	0	0	0	0.0380271	0.0908724	0.118812	0.0354043	0	0.0897254	0.0435901	0.230305	0.177812
ENSGALG00000048882	-	1.74267	0.313873	5.55214	2.82189e-08	8.6234e-07	0.777771	1.05573	0.555638	0	0.542955	0.807004	1.5341	1.15575	1.58778	1.79438	1.89574	3.1512
ENSGALG00000048945	-	-1.60694	0.558081	-2.8794	0.00398433	0.0192515	0.182754	0.240531	0.173832	0.0560248	0.102294	0.145948	0.0402107	0	0.0329033	0.0800676	0.0343755	0.0826821
ENSGALG00000048985	-	-3.44985	1.21057	-2.84977	0.00437507	0.0206362	0.19769	0.064457	0.101511	0.0275808	0.0327645	0.856076	0	0	0.098718	0	0	0
ENSGALG00000049020	-	-2.58381	0.967862	-2.66961	0.00759405	0.0314947	0	0	0	0	0	0	0	0	0	0	0	0
ENSGALG00000049035	LOC112531497	1.57357	0.511382	3.07709	0.00209033	0.0117284	0.0967459	0.0780106	0.0664601	0.0269543	0.18434	0.0598531	0.126642	0.109801	0.112564	0.182113	0.125971	0.236854
ENSGALG00000049040	-	-1.15088	0.355812	-3.23452	0.00121848	0.00764176	0.0532505	0.208306	0.335739	0.371207	0.546425	0.106309	0.2175	0	0.160281	0.156424	0.278311	0.105798
ENSGALG00000049050	-	-3.02213	0.613062	-4.92957	8.241e-07	1.61164e-05	0.140412	0.163961	0.0582425	0.0238625	0.0565737	0.107702	0.0220521	0	0	0	0	0.0551936
ENSGALG00000049052	-	1.26957	0.331344	3.83159	0.000127319	0.00118902	263.065	229.548	151.598	291.038	177.641	106.816	376.985	625.72	307.68	694.407	309.905	379.099
ENSGALG00000049090	-	-1.67408	0.568987	-2.94221	0.00325882	0.0165977	0.125417	0.482073	0.133291	0.109914	0.130249	0.125593	0.0255746	0	0.154171	0	0.099918	0.0315584
ENSGALG00000049105	-	-1.91314	0.534417	-3.57986	0.000343784	0.00269113	0	0	0	0	0	0	0	0	0	0	0	0
ENSGALG00000049140	-	-1.97197	0.764181	-2.5805	0.00986572	0.0384624	1.10416	4.95566	2.57533	3.96918	1.18991	19.7289	0.280529	0.377688	4.95948	1.33772	0.703998	0.524368
ENSGALG00000049157	DOK4	1.73695	0.270097	6.43086	1.26884e-10	6.46706e-09	19.7033	13.1258	10.2382	26.9049	18.4688	10.6417	50.525	44.1444	35.9388	64.1678	51.4189	53.4775
ENSGALG00000049164	-	1.01405	0.279847	3.62357	0.000290562	0.00234314	0.734587	0.718908	0.593605	0.362164	0.447653	0.28589	0.962266	1.01541	0.817935	0.660823	0.820909	0.704839
ENSGALG00000049180	-	-1.9361	0.741287	-2.61181	0.00900636	0.0358255	0	0.259526	0.0872332	0.243933	0.126473	0.297383	0.0328011	0	0.0853005	0.0801915	0	0.0415776
ENSGALG00000049199	-	-2.39806	0.900734	-2.66234	0.00776003	0.0320175	0.0435393	0.127561	0.22316	0.072696	0.0432266	0.764159	0.0334663	0	0.043524	0.0416545	0	0.0423614
ENSGALG00000049224	-	-1.53194	0.602713	-2.54173	0.0110304	0.0418593	0.169436	0.647915	0.362419	0.839365	1.08916	1.01217	0.119642	0.0442694	0.311373	0.258146	0.1876	0.457424
ENSGALG00000049308	-	-2.24634	0.905425	-2.48098	0.0131022	0.0475362	0.475315	0.613089	1.79381	0.886819	0.984788	8.05067	0.0902705	0.0208159	1.76799	0.0576986	0.038503	0.212154
ENSGALG00000049313	-	-3.16177	1.27391	-2.48195	0.0130666	0.0474376	0	0	0.261835	0	0	0	0	0	0	0	0	0
ENSGALG00000049333	-	-3.81035	1.01706	-3.74643	0.000179371	0.00157798	0.218897	0.239945	0.130696	0.127692	0.0761816	0.0352903	0	0	0.0768851	0	0	0
ENSGALG00000049350	-	-2.77105	0.954664	-2.90264	0.00370031	0.0182554	0.0839605	0.324331	0.428693	0.137252	0.215618	1.58261	0	0.0701931	0.232852	0.0157813	0.0160155	0.0973802
ENSGALG00000049353	-	3.34647	1.32654	2.5227	0.0116459	0.0435665	0.111807	0	0	0.0472161	0	0	0.0437045	0.238174	0.167571	0.426646	0	0.383536
ENSGALG00000049354	-	-2.8724	0.897665	-3.19986	0.00137497	0.00837918	0.0970177	0.248162	0.299955	0.35366	0.0720101	2.3158	0.0465728	0.126917	0.308385	0	0.02315	0.0470331
ENSGALG00000049375	-	-1.72385	0.650618	-2.64956	0.00805959	0.03293	1.37656	1.86651	3.66318	1.12552	0.821987	11.3845	0.364773	0.313914	3.7231	0.881238	0.518265	0.377645
ENSGALG00000049390	-	-1.0327	0.205393	-5.0279	4.95872e-07	1.04499e-05	9.35384	7.11277	9.04259	8.39257	8.62388	14.0537	3.01854	5.1183	5.50143	4.47933	2.74691	3.0488
ENSGALG00000049428	-	-2.36056	0.913624	-2.58373	0.00977377	0.0381569	0.161814	0.404042	0.743027	0.307937	0.463143	2.8187	0	0.0314669	0.565674	0.0434043	0.0484589	0.113777
ENSGALG00000049456	-	-3.86613	1.42049	-2.7217	0.00649474	0.0279047	0	0	0.126339	0	0.246801	0.710014	0	0	0.100429	0	0	0
ENSGALG00000049487	KCNK15	1.49046	0.40062	3.72039	0.000198912	0.00171319	0.534908	0.326178	0.15722	0.366036	0.540104	0.94277	1.2763	0.946254	0.456148	1.16715	1.50258	1.70636
ENSGALG00000049551	CCLI7	1.21206	0.486657	2.49059	0.0127533	0.0465005	0.913071	0.162623	1.23513	0.439122	0.947261	1.83023	1.41241	1.57909	1.81696	1.73348	0.95362	1.99889
ENSGALG00000049641	-	-3.51288	1.2464	-2.81842	0.00482599	0.0222691	0.0845687	0.0273442	0.0579313	0.0691783	0.0280351	0.307669	0	0	0.0563336	0	0	0
ENSGALG00000049674	-	-2.55224	0.889303	-2.86993	0.00410558	0.0197016	0.30614	0.405892	0.429233	0.862098	0.644762	3.33225	0.113099	0.0740221	0.731428	0.054162	0.0350603	0.0924609
ENSGALG00000049753	LOC100859709	-2.16449	0.854085	-2.53428	0.011268	0.0424833	0.0588776	0.544656	0.180229	0.616767	0.539108	2.71348	0	0	0.306421	0.328009	0.08386	0
ENSGALG00000049807	-	1.65245	0.279367	5.91496	3.31954e-09	1.26458e-07	7.70653	11.694	7.18354	10.3619	9.20954	6.8742	12.2865	43.8395	14.7102	28.602	22.0729	31.5503
ENSGALG00000049871	-	1.8754	0.752307	2.49286	0.0126719	0.046274	148.301	70.1152	21.4781	44.2661	29.2839	25.9668	331.901	469.953	44.8258	100.016	71.6433	136.361
ENSGALG00000049947	-	-2.05503	0.441323	-4.65653	3.21586e-06	5.31391e-05	1.2309	0.870351	1.83223	1.47362	1.48155	1.40156	0.137044	0.510423	0.299934	0.486852	0.193919	0.324443
ENSGALG00000049965	-	1.07807	0.253025	4.26073	2.03764e-05	0.000249802	10.4784	8.52183	8.15429	12.6642	7.85291	7.27682	14.9262	12.6725	14.4077	30.4169	14.2025	12.4978
ENSGALG00000049967	-	-3.21018	0.799362	-4.01594	5.92104e-05	0.000622727	0.125847	0.411723	0.152484	0.156309	0.472636	2.84487	0.0520983	0.070833	0.11615	0.0215972	0.0221164	0.115758
ENSGALG00000049992	-	1.25458	0.335821	3.73587	0.000187066	0.00163288	1.86662	3.472	3.75204	1.4429	1.84769	1.98353	2.415	7.12521	5.53725	8.6657	5.26656	5.19657
ENSGALG00000050016	-	-2.89385	1.07586	-2.68979	0.00714977	0.0301045	0.0619353	0.061169	0	0	0	0.289687	0	0	0	0	0	0
ENSGALG00000050021	LOC107055644	-5.51801	1.20065	-4.59586	4.30974e-06	6.77138e-05	0	0	0	0	0	0.250293	0	0	0	0	0	0
ENSGALG00000050033	-	-3.05328	1.19965	-2.54515	0.0109232	0.0415085	0.0783062	0.0565591	0.060158	0.0322186	0.038802	0	0	0	0	0.018557	0	0
ENSGALG00000050061	-	-1.7318	0.634089	-2.73116	0.00631124	0.0272834	0.102558	0.0497217	0.273768	0.216633	0.0659372	0.551107	0	0.139712	0.217011	0.0322659	0.0752834	0
ENSGALG00000050076	-	-3.21718	0.942093	-3.41493	0.000637978	0.00450032	0.0759037	0.0740488	0.118119	0.151462	0.180977	0.108605	0	0	0.0379576	0.0289637	0	0
ENSGALG00000050098	-	-3.89505	1.06814	-3.64659	0.000265748	0.0021817	0	0.363982	0.146388	0.0398936	0.238673	2.35105	0	0	0.0469115	0	0.0484132	0.046486
ENSGALG00000050124	-	-1.92292	0.643848	-2.9866	0.00282099	0.0148181	0.120447	0.296225	0.253424	0.157009	0	1.09147	0	0.064489	0.180552	0.0593726	0.0618233	0
ENSGALG00000050137	-	-3.1198	0.993932	-3.13885	0.00169612	0.00989922	0.147565	0.216086	0.152185	0.338782	0.999808	4.59507	0	0	0.220455	0.105747	0.182379	0.181332
ENSGALG00000050159	LOC107054441	-1.1923	0.35123	-3.39463	0.000687213	0.0047756	1.4709	1.22036	2.22674	2.57591	2.54884	6.39644	0.701049	0.824434	1.8017	1.17282	0.699548	0.983761
ENSGALG00000050170	-	-1.59009	0.498879	-3.18731	0.001436	0.00867891	0.0768622	0.0149947	0.0630487	0.140593	0.167838	0.0284894	0.0236167	0	0	0.0728349	0	0
ENSGALG00000050217	-	-2.55086	1.01767	-2.50657	0.012191	0.0449738	0	0.0228682	0.169216	0.0385228	0	0.0213765	0	0	0.0234936	0	0	0
ENSGALG00000050220	-	-2.89718	0.848519	-3.4144	0.00063922	0.00450531	0.270563	0.855103	0.941984	0.241891	2.10935	10.0228	0.091105	0.168239	0.88045	0.238574	0.243982	0.452445
ENSGALG00000050231	-	-3.18737	1.04087	-3.06223	0.00219697	0.0121624	0.10574	0.373855	0.574623	0.290654	0.0810723	4.17219	0	0	0.406352	0.0548336	0.0265627	0.0492062
ENSGALG00000050277	LOC112530958	2.00658	0.66335	3.02491	0.00248704	0.0134566	0	0.251812	0.425392	0.11626	0.282411	0	0.912109	0.672006	0.772876	0.26199	0.751391	1.08579
ENSGALG00000050352	BCL2L15	1.30914	0.350089	3.73946	0.000184419	0.00161479	1.51855	2.06938	1.42883	1.17416	1.78179	1.72716	1.22789	4.25145	3.3288	6.9451	2.8078	3.23146
ENSGALG00000050372	SYCN	1.56194	0.475761	3.28304	0.00102694	0.00661503	1.53931	4.96656	2.44621	3.79732	2.10666	1.12849	5.26418	16.8185	8.34507	12.28	7.4498	4.35556
ENSGALG00000050381	-	-1.2396	0.38373	-3.2304	0.00123616	0.00772334	0.352069	0.975902	0.317397	0.516022	0.263529	0.331894	0.203121	0.183078	0.0864744	0.125145	0.172175	0.213801
ENSGALG00000050402	-	-2.75027	0.940596	-2.92397	0.003456	0.0173501	0	0	0.244792	0.19866	0.16194	0.963246	0	0.0738375	0.146206	0	0	0
ENSGALG00000050403	LYPD1	1.30555	0.260949	5.00308	5.64202e-07	1.16767e-05	5.03384	5.24602	3.46343	6.87579	5.82586	3.11883	15.8653	15.7292	8.94217	10.3308	10.3027	10.1364
ENSGALG00000050415	-	-2.49709	0.588804	-4.24096	2.22569e-05	0.000270586	0	0	0	0	0	0	0	0	0	0	0	0
ENSGALG00000050460	-	1.26361	0.356369	3.54581	0.000391414	0.00298759	0.658351	0.514423	0.40967	0.223416	0.795845	0.369097	2.67656	2.53589	1.45792	2.31372	0.526051	0.521866
ENSGALG00000050475	-	-1.72419	0.572885	-3.00966	0.00261537	0.0139669	0.329398	0.910927	0.924739	0.869736	0.520466	1.51733	0	0.345472	0.280209	0.451085	0.140976	0
ENSGALG00000050504	-	-2.29571	0.697648	-3.29065	0.000999572	0.00647089	0.219028	0.253118	0.135834	0.182794	0.218224	0.120111	0.0332497	0	0.0432844	0.0836111	0	0
ENSGALG00000050529	-	-2.81279	0.674627	-4.1694	3.054e-05	0.000352455	0.810729	0.265529	0.733732	0.323131	0.218575	0.254969	0	0.174424	0.218698	0	0	0.0538876
ENSGALG00000050557	-	-2.10231	0.815468	-2.57803	0.00993642	0.0386753	0.247411	0.116519	0.0792694	0.0849641	0.368846	1.03036	0.0692284	0.0161759	0.209121	0.0808232	0.0450695	0.0702473
ENSGALG00000050568	HFM1	-1.07392	0.298495	-3.59777	0.000320956	0.00254198	0.350431	0.463505	0.579867	0.427863	0.71516	0.819524	0.200766	0.166696	0.387831	0.444155	0.164002	0.258478
ENSGALG00000050570	-	-1.94933	0.652133	-2.98917	0.00279738	0.014724	0.0784282	0.0379821	0.403986	0.0322579	0.227979	0.228483	0.0595112	0	0.155589	0	0.0762163	0.0610812
ENSGALG00000050593	-	-2.83591	1.13422	-2.50033	0.0124079	0.0455371	0.04273	0.0265658	0.324189	0.117997	0.201147	1.11064	0	0	0.140212	0.0259982	0.026783	0
ENSGALG00000050611	-	1.72359	0.276593	6.23152	4.61944e-10	2.16061e-08	81.5459	40.0346	46.6998	74.3023	47.9301	31.4256	221.543	155.44	93.9274	178.789	107.742	198.606
ENSGALG00000050622	-	-1.58592	0.620043	-2.55776	0.0105348	0.0403677	0.769663	0.501473	1.99738	0.442792	1.31008	4.5689	0.0810634	0.348076	1.67319	0.0696937	0.219142	0.25492
ENSGALG00000050625	-	-3.3158	1.1967	-2.77078	0.00559215	0.0248576	0.161858	1.06435	0.771048	0.76837	0.113359	4.03633	0	7.63e-06	0.774133	7e-07	0	0.105271
ENSGALG00000050634	LOC112530469	1.23248	0.307013	4.01443	5.95891e-05	0.000625537	3.77648	5.63023	6.19628	8.58056	2.8445	5.35937	9.80453	14.4245	9.58052	16.4949	5.34997	11.1989
ENSGALG00000050650	-	-3.35158	1.18731	-2.82283	0.00476017	0.0220318	0.117214	0.108981	0.0305988	0	0	0	0	0	0	0	0	0
ENSGALG00000050670	-	-2.83611	0.658365	-4.3078	1.64884e-05	0.000210008	0.100087	0.0483959	0.077985	0.126491	0.0505831	0.215776	0	0	0.0249156	0	0.0253333	0
ENSGALG00000050720	-	1.4878	0.462216	3.21884	0.00128711	0.00795897	0.277337	0.470162	0.214982	0.4658	0.154733	0.101793	0.838161	0.968667	1.30192	0.773383	0.874111	0.31534
ENSGALG00000050764	-	1.78057	0.479058	3.71682	0.000201747	0.00173405	0.0491951	0.0475123	0.0503642	0.0539697	0.129678	0.0738805	0.209996	0.15473	0.162892	0.0933082	0.361096	0.111537
ENSGALG00000050829	-	-1.53279	0.425001	-3.60655	0.000310296	0.00246568	0.0492062	0.120638	0.253605	0.284719	0.252231	0.0467339	0.0227688	0.0835051	0.0700302	0.0646327	0.0220477	0.065036
ENSGALG00000050830	LOC101748017	2.41028	0.457908	5.26368	1.412e-07	3.50667e-06	2.13557	2.61397	0.567679	1.91459	2.03331	0.840857	9.04081	8.99437	2.47828	3.02394	8.9101	14.645
ENSGALG00000050857	FRMPD2	-2.07555	0.492703	-4.21258	2.5247e-05	0.000299794	0.584285	0.33197	0.284031	0.308667	0.374414	1.16938	0.167679	0.122062	0.207916	0.176641	0.0159109	0.0653168
ENSGALG00000050866	HSD3B1	1.81265	0.32271	5.61694	1.94367e-08	6.21767e-07	72.2018	67.8022	45.7187	74.5822	45.5992	21.0944	172.947	299.739	175.365	174.546	108.854	107.74
ENSGALG00000050885	LOC101748692	-1.13015	0.330167	-3.42295	0.000619462	0.0043992	0.860669	1.07733	1.51962	1.8287	1.69584	3.18799	0.312911	0.504345	1.33089	0.971784	0.720033	0.577069
ENSGALG00000050908	-	1.05346	0.378179	2.78562	0.00534254	0.0240612	0	0.0377622	0.0405887	0	0	0.0371104	0.0309187	0	0	0	0	0
ENSGALG00000050932	-	-4.27069	1.60156	-2.66658	0.00766267	0.0317463	0.412714	0	0.187011	0.0406121	0.0484571	2.95561	0	0	0.254449	0	0	0.0477012
ENSGALG00000050965	-	-1.64204	0.417405	-3.93392	8.35718e-05	0.000835123	0.0202549	0.0389525	0.0217715	0.0360895	0	0.0623696	0.0171288	0.0429273	0	0.0417595	0.112858	0.0208602
ENSGALG00000051001	LOC107053122	1.41135	0.346252	4.07608	4.58019e-05	0.000500787	19.6902	13.7573	10.1892	37.6953	12.5614	17.2987	34.6491	45.1506	19.8609	78.3523	30.2321	73.6709
ENSGALG00000051025	-	1.8214	0.482312	3.77639	0.000159118	0.00143122	2.53352	1.7916	1.48248	1.33072	2.4602	0.578196	10.377	2.79161	3.9713	1.27515	10.4573	3.08795
ENSGALG00000051070	-	-2.07892	0.766835	-2.71104	0.00670721	0.0285986	0.526533	0.358269	0.882063	0.449247	1.09866	4.00181	0.0738566	0.0412158	1.14227	0.103762	0.244983	0.0636682
ENSGALG00000051117	-	-1.39598	0.545793	-2.5577	0.0105366	0.0403677	0.727225	0.39125	0.297832	0.305989	0.176223	0.233993	0.18197	0.0673686	0.0481555	0.260553	0.0927246	0.234963
ENSGALG00000051142	FAM180B	-1.11679	0.29398	-3.79887	0.00014536	0.00133455	9.65677	7.96318	13.0367	11.7517	14.5404	19.3654	3.81284	5.40118	11.5407	4.26478	3.40081	3.32863
ENSGALG00000051148	PLIN5	-1.17219	0.295034	-3.97308	7.095e-05	0.000724473	0.610741	1.16906	0.703354	1.43314	0.818621	1.2253	0.25993	0.235915	0.829912	0.195435	0.130105	0.272289
ENSGALG00000051194	-	1.44465	0.444772	3.24807	0.00116192	0.00734647	0.145282	0.0346021	0	0.171106	0.184173	0.265574	0.165693	0.219714	0.510006	0	0.192098	0.26239
ENSGALG00000051227	-	-2.53424	1.01173	-2.50486	0.0122499	0.0451449	0.101686	0.241351	0.325078	0.188658	0.0880352	2.69838	0	0.1312	0.309545	0	0	0.123525
ENSGALG00000051247	-	-1.78146	0.569382	-3.12876	0.00175546	0.0101715	0.983835	0.7474	1.31483	0.423646	0.950496	4.10126	0.150075	0.208361	1.28225	0.304074	0.633147	0.454238
ENSGALG00000051258	-	1.2787	0.258653	4.94369	7.66572e-07	1.52212e-05	1.10519	1.1469	1.72482	0.611579	1.15024	1.15152	2.06922	1.61623	2.76171	1.70818	3.47138	3.01995
ENSGALG00000051300	-	-2.72955	0.366624	-7.44509	9.68799e-14	9.94673e-12	9.92996	13.1569	9.19397	12.9116	9.50032	4.55193	1.48255	0.957822	1.00672	3.24495	1.38731	0.696548
ENSGALG00000051315	-	-3.48922	1.37377	-2.53988	0.0110889	0.0419868	0	0.0876481	0.275287	0	0.0446932	1.32187	0	0	0.0891501	0	0.0441199	0
ENSGALG00000051352	-	-1.72092	0.60251	-2.85625	0.00428674	0.0203668	0.822437	1.11378	0.198872	0.429633	1.22635	0.736348	0.402344	0.135246	0	0.244292	0.512426	0.0630435
ENSGALG00000051365	-	-1.78107	0.600842	-2.96428	0.00303389	0.0156681	0.770651	0.978595	1.40359	0.763399	1.29646	4.08633	0.204268	0.280901	1.37334	0.282586	0.1928	0.488214
ENSGALG00000051418	-	-1.15207	0.396354	-2.90667	0.00365299	0.0180696	0.543186	0.793072	0.908242	1.01239	0.903527	1.38655	0.243869	0.118992	0.698743	0.616196	0.351818	0.220386
ENSGALG00000051456	RTN2	1.32165	0.262745	5.03017	4.9005e-07	1.03568e-05	0.481506	0.465989	0.649571	0.821202	0.4718	0.331711	1.56321	1.61842	1.51129	0.537049	1.4285	1.82398
ENSGALG00000051489	-	-2.47849	0.944669	-2.62366	0.00869898	0.034858	0.117558	0.259272	0.646959	0.351903	0.546664	1.11909	0	0.084788	0.293208	0	0.0261242	0.0260781
ENSGALG00000051541	-	-6.22242	1.90746	-3.26215	0.0011057	0.00704437	0	0.0452729	0.145073	0	0.0470952	1.47582	0	0	0	0	0	0
ENSGALG00000051543	-	-2.23633	0.608712	-3.67387	0.000238901	0.0020013	0	0	0.103356	0	0	0.0945434	0	0	0.119565	0	0	0.196742
ENSGALG00000051550	-	-1.89474	0.420724	-4.50353	6.68341e-06	9.87152e-05	15.5107	14.9748	17.2574	11.5966	16.1274	46.6041	2.96346	4.22283	13.8151	2.85634	2.57341	4.13296
ENSGALG00000051553	-	-1.57256	0.567023	-2.77336	0.0055481	0.0247442	0.589965	1.64031	0.624255	2.05509	0.77897	1.26716	0.274995	0.353666	0.591085	0.754798	0.130631	0.127539
ENSGALG00000051638	-	1.74207	0.270528	6.43952	1.19855e-10	6.13411e-09	1.60203	1.15173	0.742716	1.25277	1.02868	0.582275	4.18754	2.71728	3.60068	2.45614	2.9074	4.13562
ENSGALG00000051647	-	-1.44556	0.397168	-3.63967	0.000272991	0.00222549	0.100152	0.195151	0.204748	0.0412725	0.0994977	0.284525	0.113635	0.0521191	0.100112	0.0479064	0.0968421	0
ENSGALG00000051688	-	-2.40842	0.859216	-2.80304	0.00506227	0.0230875	0	0.102047	0.462242	0.0768079	0.24019	1.05272	0	0	0.314453	0.0303063	0.0883904	0.0306137
ENSGALG00000051709	-	-2.72368	0.751298	-3.6253	0.000288621	0.00233308	0.145636	0.523744	0.12826	0.165868	0.590835	0.655188	0.0388088	0.156151	0.195618	0	0	0.0481176
ENSGALG00000051748	METTL11B	-1.50464	0.490297	-3.06884	0.00214892	0.0119733	1.65859	1.12373	2.32012	1.7612	1.15072	6.24992	0.692622	0.31399	1.62383	1.16578	0.330384	0.437602
ENSGALG00000051772	-	-2.92991	0.850489	-3.44497	0.000571123	0.00410789	0.17255	0.195428	0	0.082826	0.129642	1.08854	0	0	0.117847	0.145349	0	0
ENSGALG00000051858	-	-3.51582	1.13522	-3.09702	0.00195474	0.0111233	0	0	0	0.0801166	0.0945853	0.267663	0	0	0.0474289	0	0.0464538	0
ENSGALG00000051859	-	-1.03531	0.286417	-3.61469	0.00030071	0.00240296	21.6832	24.152	30.3586	17.4423	27.9426	10.6952	5.37076	10.119	15.6163	10.4612	11.6621	4.91605
ENSGALG00000051874	-	-2.76768	0.943957	-2.93199	0.00336795	0.0170295	0.170271	0.252625	0.264575	0.290223	1.02689	3.22123	0.0673889	0	0.431874	0.164578	0.0844643	0
ENSGALG00000051893	-	-2.83066	0.880115	-3.21623	0.00129885	0.00801981	0.153665	0.496912	0.36207	0.218088	0.10379	1.83153	0.0801184	0.0541403	0.347677	0	0.0514743	0.0507177
ENSGALG00000051929	-	-1.08151	0.385026	-2.80893	0.00497062	0.0228046	0	0.133121	0.142717	0.0581923	0.069344	0.857464	0	0	0.2065	0	0	0
ENSGALG00000051984	CDH3	-2.04255	0.275775	-7.40658	1.29596e-13	1.2761e-11	61.1454	71.07	47.3123	83.0089	62.6044	62.9546	6.90996	17.674	18.0422	22.2572	10.0436	10.5632
ENSGALG00000052018	-	-2.60357	0.947739	-2.74714	0.00601177	0.0263404	0.0984701	0.0729775	0.125914	0.0806516	0.194589	0.649127	0.0374015	0	0.148131	0	0.046483	0.0239165
ENSGALG00000052034	LOC768995	-1.92337	0.730413	-2.63326	0.00845692	0.0341563	0.191252	0.302503	0.730175	1.0097	0.845236	2.14242	0.0271971	0	0.319097	0.33256	0.185519	0.283659
ENSGALG00000052080	-	-2.25455	0.782756	-2.88027	0.00397336	0.0192196	0.867154	1.08772	1.16831	0.589052	2.03556	10.2153	0.123099	0.267122	1.87596	0.172245	0.155546	0.463631
ENSGALG00000052100	-	-2.30713	0.691321	-3.33729	0.000846011	0.00564164	1.21357	0.831105	0.949262	0.702678	1.45193	11.159	0.150224	0.379359	1.45415	0.253855	0.214354	0.558551
ENSGALG00000052110	-	1.68619	0.616811	2.73372	0.00626226	0.0271461	0.0185831	0.0180445	0.0380712	0.0377122	0.0368223	0.0510171	0.017236	0.0869387	0.111081	0.112691	0.0970926	0.102337
ENSGALG00000052203	-	-1.24907	0.460847	-2.71037	0.0067208	0.028639	0.320813	0.648967	0.725889	0.603022	0	0.779172	0	0	0	0.650414	0.397004	0
ENSGALG00000052214	-	-1.24605	0.419038	-2.97359	0.0029434	0.0153139	0.405043	0.610779	0.843686	1.51029	0.728777	1.61947	0.292002	0.0966165	1.0763	0.588964	0.230899	0.105078
ENSGALG00000052247	-	-2.30666	0.828636	-2.78368	0.00537461	0.024152	0.0684553	0.0992685	0.245782	0.480241	0.44242	1.31007	0.0523478	0	0.237124	0	0.0992736	0.0266109
ENSGALG00000052261	-	-1.32223	0.255873	-5.16755	2.37186e-07	5.57784e-06	11.4187	11.9526	21.6256	13.2421	13.4227	28.3506	4.40279	4.63502	10.1588	6.44901	4.12948	5.55495
ENSGALG00000052315	-	-2.96158	1.05005	-2.82042	0.00479612	0.0221666	0.205844	0.171562	0.149489	0.454177	0.0872644	2.91874	0.0223901	0.0310232	0.44053	0.0273627	0.0281101	0.0570876
ENSGALG00000052452	-	1.81692	0.585122	3.1052	0.00190149	0.0108644	0.620065	0.785701	1.14012	5.19045	1.13344	1.495	1.09629	5.60094	5.53153	11.3962	4.32117	5.90656
ENSGALG00000052481	LOC112530337	1.01434	0.196675	5.15742	2.50375e-07	5.83837e-06	3.2916	4.34791	1.46271	2.9178	4.06144	1.92324	5.36148	5.66478	5.05004	5.22644	6.06032	5.90307
ENSGALG00000052586	-	-1.1512	0.460222	-2.50139	0.0123708	0.0454602	0.310487	0.451299	0.387184	0.271699	0.242087	1.03589	0.134164	0.139778	0.485445	0.234072	0.0855296	0.171546
ENSGALG00000052595	-	-2.33638	0.692515	-3.37377	0.000741476	0.00506901	0.150508	0.364985	0.507864	0.41811	0.79938	4.26233	0.0530418	0.223088	0.522466	0.187128	0	0
ENSGALG00000052636	-	1.79669	0.384848	4.66858	3.03287e-06	5.06119e-05	7.27773	27.0365	19.9008	34.1862	15.0912	13.697	19.225	99.0774	30.6856	90.303	33.0064	74.6876
ENSGALG00000052643	-	1.10869	0.376072	2.94809	0.00319749	0.0163546	2.94367	2.51137	3.62345	1.04942	0.981081	1.76295	1.7791	6.22402	3.48618	7.67982	1.54421	3.64326
ENSGALG00000052645	-	1.56392	0.255917	6.11106	9.89728e-10	4.22545e-08	37.7708	55.1892	44.6067	62.8271	54.2485	28.5453	82.0587	176.549	80.6298	136.754	117.861	171.463
ENSGALG00000052721	-	-2.53842	1.02977	-2.46503	0.0137001	0.0490606	0.143831	0.392612	0.777333	0.437995	0.913197	1.68582	0	0.0433428	0.611578	0.0192807	0.0397193	0.0200596
ENSGALG00000052786	ZNF185L	-1.00026	0.330673	-3.02494	0.00248686	0.0134566	1.20801	1.02475	1.58911	1.17391	1.51867	4.37331	0.588942	0.502131	1.36137	0.471689	0.657361	0.861534
ENSGALG00000052798	-	1.28286	0.370176	3.46553	0.000529193	0.00384407	489.088	481.486	300.825	631.894	329.731	205.204	645.766	1294.78	568.482	1591.13	510.606	653.432
ENSGALG00000052806	-	-4.23026	0.911362	-4.64169	3.45565e-06	5.6382e-05	0.0259172	0.175595	0.0265092	0.106226	0.282187	0.866068	0	0	0.0257418	0	0.0248416	0.0587236
ENSGALG00000052809	-	-3.0907	1.12005	-2.75943	0.00579022	0.0255559	0.0307822	0.149787	0.336173	0.212831	0.214992	2.03458	0.0636652	0	0.197102	0	0.0300519	0.0796559
ENSGALG00000052818	-	1.53928	0.278004	5.53689	3.07894e-08	9.34112e-07	63.1648	24.9921	24.3339	36.6037	37.3036	25.0256	123.728	97.6506	45.5177	84.1499	85.973	137.919
ENSGALG00000052822	-	-1.95499	0.429121	-4.55582	5.21825e-06	8.00226e-05	0.226349	0.509761	0.115864	0.265853	0.689795	0.466622	0.042879	0.0196774	0.111583	0.179025	0.108758	0.0913531
ENSGALG00000052827	-	-1.49377	0.565914	-2.63957	0.0083011	0.0336886	0.462411	0.966464	0.29591	0.971149	0.5169	0.704976	0.134641	0.124585	0	0.277136	0.112497	0.337466
ENSGALG00000052835	-	-1.88674	0.760996	-2.4793	0.013164	0.0476883	0.246934	0.207271	0.218249	0.238304	0.318262	0.131088	0.108223	0	0.141305	0	0.034505	0.138345
ENSGALG00000052858	LOC107051687	-2.6121	0.923476	-2.82855	0.00467596	0.0217497	0.209192	0.262807	0.108026	0.490516	0	0.217481	0.0329884	0.0441253	0.0623877	0.04019	0	0
ENSGALG00000052864	-	-2.79765	0.806521	-3.46878	0.000522824	0.00380601	0.0978183	0.165341	0.074857	0.137386	0.072365	0.771001	0.0185062	0.0255089	0.0729024	0.0672197	0.0464621	0.0475081
ENSGALG00000052877	-	-4.79525	1.53105	-3.13201	0.00173613	0.0100804	0	0.171227	0	0	0.0888916	0.828848	0	0	0	0	0	0
ENSGALG00000052880	-	-1.10572	0.297014	-3.7228	0.000197023	0.0017004	0.772064	0.853938	0.581921	0.298841	0.529467	0.365106	0.190328	0.259364	0.245179	0.102613	0.277981	0.239897
ENSGALG00000052918	LOC101750889	1.07916	0.25464	4.23798	2.25536e-05	0.000272423	1.54693	1.14089	0.750699	0.96043	0.911861	1.08783	3.33386	1.53314	1.50102	1.83843	1.92417	2.29647
ENSGALG00000052921	-	-1.94442	0.598234	-3.25026	0.00115298	0.00730397	0.83752	1.01696	0.433676	0.206888	1.26575	3.13484	0.191524	0.29566	0.871393	0.0338209	0.383251	0.103337
ENSGALG00000053015	-	-3.52493	1.36781	-2.57705	0.00996469	0.0387585	0.0230606	0.022438	0.0925767	0.0191755	0.0606382	0.490136	0.0180159	0	0.022906	0	0	0.0225618
ENSGALG00000053039	-	-2.43628	0.874702	-2.78527	0.00534837	0.0240662	0.254697	0.953589	1.13701	0.519972	5.54815	10.7701	0.0923769	0.304632	2.00113	0.0753479	0.44928	0.410852
ENSGALG00000053043	CARHSP1	-1.04779	0.224425	-4.6688	3.02971e-06	5.06094e-05	42.3396	51.3706	46.2602	54.6289	63.4544	100.552	21.0176	24.979	49.1371	21.1491	22.798	26.8031
ENSGALG00000053075	-	-3.43348	1.35648	-2.53118	0.0113681	0.042784	0	0.129145	0.130705	0.0471237	0.0636141	0.598455	0	0	0.0385475	0	0	0
ENSGALG00000053079	-	-2.27402	0.906868	-2.50756	0.0121569	0.0448968	0.0797061	0.195425	0	0	0	0	0	0	0	0	0	0
ENSGALG00000053092	LOC426456	1.1179	0.372831	2.99841	0.00271393	0.0143632	0.132068	0	0.0555165	0.115021	0.0809612	0.154254	0.16698	0.249987	0.130958	0.210152	0.189463	0.235524
ENSGALG00000053118	-	-2.06067	0.819572	-2.51433	0.011926	0.04429	0.446101	0.259938	0.367002	0.302711	0.578202	2.29626	0.0343215	0.141805	1.2886	0	0.131115	0.0434425
ENSGALG00000053121	LOC417536	1.62309	0.503262	3.22514	0.00125912	0.00782904	0.359802	0.55093	1.18233	1.32312	0	3.22389	2.74412	3.16546	3.14126	2.51342	1.35241	6.49573
ENSGALG00000053152	LOC107051263	-1.06991	0.0934552	-11.4484	2.39649e-30	2.12379e-27	17.4649	17.0122	17.2987	17.6383	19.7483	23.6976	8.22489	6.15273	10.1693	8.13262	8.75554	7.80301
ENSGALG00000053164	-	1.64158	0.278023	5.90447	3.53779e-09	1.33864e-07	76.1386	68.6202	48.1861	78.6981	88.7229	34.6037	191.112	207.113	101.349	189.175	236.647	193.492
ENSGALG00000053241	LOC424199	1.9633	0.688022	2.85355	0.00432342	0.0204891	0	0.073862	0.0415813	0.068427	0.0413049	0.041593	0.0991388	0.510732	0.113006	0.352915	0.0880755	0.117361
ENSGALG00000053254	EHHADH	1.12927	0.197907	5.70608	1.15607e-08	3.90097e-07	3.0425	3.14904	4.08961	3.28889	2.55879	2.81707	5.39781	7.87174	5.99714	9.19628	4.46491	5.57916
ENSGALG00000053292	-	-2.67286	0.845263	-3.16216	0.00156605	0.00928747	0	0	0.0520951	0	0.0754715	0.161703	0	0.0266702	0	0	0	0
ENSGALG00000053318	-	-2.51923	0.535729	-4.70243	2.57081e-06	4.35924e-05	0.725958	0.285638	0.405128	0.183759	0.532826	0.249466	0.0227849	0.083346	0.137273	0.0688466	0.0599034	0.0970755
ENSGALG00000053330	-	-1.32963	0.414623	-3.20685	0.00134197	0.00824372	1.83515	4.19855	4.30169	4.72844	4.00004	3.40713	0.535555	2.21378	2.65006	2.10746	0.567455	0.793214
ENSGALG00000053434	-	1.83919	0.594784	3.0922	0.00198678	0.0112752	31.0534	119.974	85.379	39.0704	25.7873	22.5215	58.9723	526.199	180.396	110.413	67.5808	138.126
ENSGALG00000053525	-	-2.05536	0.642079	-3.20111	0.00136901	0.00835501	0.260005	0.199458	0.272716	0.433047	0.212209	2.09233	0	0.254087	0.885004	0.111977	0	0.104065
ENSGALG00000053549	ADAM8	1.19831	0.322075	3.72058	0.000198768	0.00171282	0.360912	0.328977	0.601913	0.463798	0.410531	0.450235	0.503101	1.40987	0.620247	1.35062	0.476095	0.832829
ENSGALG00000053552	IER5L	1.03642	0.127297	8.14171	3.89725e-16	6.19075e-14	12.916	14.7312	21.464	20.0803	19.6004	15.7473	30.3518	28.1335	32.5623	31.2735	38.0507	35.747
ENSGALG00000053561	LOC107054872	-1.8789	0.568378	-3.30572	0.000947335	0.00618025	0.143468	0.0842162	0.0581754	0.118582	0.338007	0.562048	0.0659271	0	0.113955	0.0270017	0	0.0276067
ENSGALG00000053573	-	-3.69667	1.41609	-2.61047	0.00904172	0.0359152	0	0.0930559	0.165122	0	0.0956126	0.578854	0	0	0.0317017	0	0	0.0310747
ENSGALG00000053576	-	-3.01519	1.0111	-2.9821	0.00286275	0.0149839	0.0733461	0.123588	0.132002	0.10624	0.127991	0.965634	0.0141258	0.0191705	0.0728295	0.0349815	0.0359979	0
ENSGALG00000053581	-	-2.10948	0.724377	-2.91213	0.00358976	0.0178583	0.348174	0.678507	0.338336	0.407109	1.14058	2.76579	0.0554149	0.18445	0.742303	0.0663207	0.0671709	0.174183
ENSGALG00000053595	-	-1.17139	0.240435	-4.87198	1.10485e-06	2.09028e-05	0.708105	0.7719	1.38587	0.771005	0.931503	1.23478	0.356248	0.539458	0.505869	0.64223	0.589547	0.336004
ENSGALG00000053624	-	1.38274	0.273088	5.06335	4.11952e-07	8.93872e-06	0.277936	0.200863	0.373999	0.366489	0.147379	0.144247	0.46621	0.355225	0.620114	0.209322	0.540576	0.636832
ENSGALG00000053659	LOC421232	-1.1418	0.319006	-3.57925	0.000344588	0.00269565	1.59948	2.11729	2.62802	1.9254	2.07943	6.19325	0.657574	0.488868	2.42966	1.09161	0.722267	0.998393
ENSGALG00000053666	-	-2.16291	0.876134	-2.4687	0.0135606	0.0486749	0.28301	0.390285	2.0254	0.488484	1.07875	7.08741	0.0569867	0.0625085	1.81246	0.139841	0.173225	0.217193
ENSGALG00000053668	-	-3.25041	1.15021	-2.82593	0.00471438	0.0218921	0.0368763	0.248992	0.0460085	0.0304846	0.128461	1.04956	0	0	0.127416	0.0175059	0	0.0217111
ENSGALG00000053674	-	-2.63773	1.02436	-2.57501	0.0100238	0.0389152	0	6.92291	2.36365	0	0	0.0642492	0	0.139665	0	0	0	0.0333203
ENSGALG00000053677	LOC101749696	-1.37358	0.357324	-3.84407	0.000121011	0.00113831	0.768897	0.999712	0.392724	0.381715	0.502079	0.467143	0.211018	0.199441	0.265415	0.362305	0.266976	0.150799
ENSGALG00000053697	TMEM125	-1.70306	0.568247	-2.99704	0.00272613	0.0144076	0.440366	0.250974	0.254178	0.293875	0.435417	0.901807	0.131239	0.105254	0.299328	0	0.0847728	0.141836
ENSGALG00000053727	-	-3.787	1.43717	-2.63504	0.00841268	0.0340211	0	0	0.0369832	0.211385	0	0	0	0	0	0	0	0
ENSGALG00000053815	-	-1.39	0.557174	-2.49472	0.0126055	0.0460915	0.134333	0.130359	0.0857239	0.0414991	0.10003	0.43486	0.0769422	0.0706555	0.116813	0	0.0324419	0.0813603
ENSGALG00000053847	-	-3.12486	1.11108	-2.81246	0.00491638	0.0226158	0.713029	0.350284	0.129983	0.708834	0.0902371	3.00144	0.0709566	0	0.253441	0.20769	0	0.0884679
ENSGALG00000053922	-	-5.70734	1.67205	-3.41338	0.000641622	0.00451845	0.0179143	0.138657	0.0550055	0	0.10629	1.03044	0	0	0.0177226	0	0	0
ENSGALG00000054079	-	2.18478	0.630219	3.4667	0.000526881	0.00382892	0.02695	0.0963662	0.0418296	0.056302	0.146763	0.0126597	0.225625	0.243062	0.224958	0.773983	0.152587	0.169729
ENSGALG00000054091	-	-2.55517	0.990307	-2.58018	0.009875	0.0384896	1.72234	3.23414	0.805	0.241568	0.724428	4.01095	0.187095	0.262498	1.46652	0	0.04675	0.0477503
ENSGALG00000054099	INPP5J	-1.16526	0.243709	-4.78135	1.74122e-06	3.11568e-05	2.47883	3.38526	2.52177	2.39017	3.3797	6.09425	1.40946	1.51103	2.29068	1.02979	0.97805	1.31175
ENSGALG00000054120	-	-1.68597	0.583148	-2.89115	0.0038384	0.0187881	0.152082	0.314392	0.0669084	0.12572	0.150981	0.120188	0.0497084	0.0227373	0.0429921	0.0409873	0.084008	0.0211086
ENSGALG00000054166	-	1.82037	0.408432	4.45696	8.313e-06	0.00011733	0.622309	0.200802	0.903976	0.557659	1.09943	0.603494	3.05507	2.12564	1.77377	1.08436	2.2314	1.48632
ENSGALG00000054172	-	-1.00606	0.342906	-2.93392	0.00334714	0.0169399	1.73089	2.79835	4.05975	3.16711	5.24072	6.41184	0.821315	0.545197	2.3593	3.30912	1.5519	1.36145
ENSGALG00000054187	-	2.8063	0.558452	5.02514	5.03053e-07	1.05748e-05	0.280715	0.139543	0	0.046664	0.0764898	0.0812422	0.976731	0.898129	0.404498	0.566655	0.15787	0.779375
ENSGALG00000054194	-	-3.26942	0.885178	-3.69351	0.000221177	0.00187427	0.582564	0.220469	0.397429	0.428792	1.11567	1.82553	0.024665	0	0.321956	0.0306967	0.0309269	0
ENSGALG00000054224	LOC112530325	1.80923	0.732226	2.47087	0.0134785	0.0484629	0	0	0.0949953	0	0	0	0.0749239	0.0943204	0	0	0.117443	0.0899024
ENSGALG00000054233	-	-1.16335	0.275162	-4.22786	2.35919e-05	0.000282131	3.9585	3.74133	3.80321	2.35194	4.58219	2.98681	1.80815	2.17966	2.05571	0.65996	1.60616	1.22672
ENSGALG00000054260	-	-2.96029	0.264489	-11.1925	4.43791e-29	3.24894e-26	5.25362	3.04045	4.4841	3.58323	3.88939	2.6052	0.408667	0.498163	0.421886	0.232427	0.321721	0.519232
ENSGALG00000054280	-	-2.52587	0.926938	-2.72496	0.00643087	0.027701	0	0.0999038	0.255286	0.179998	0	0.411781	0	0	0.0342533	0.0688073	0	0
ENSGALG00000054306	SRXN1	1.09423	0.177171	6.17614	6.56861e-10	2.97318e-08	7.2961	9.50218	7.78776	11.1322	10.0105	7.67833	15.6126	20.0206	14.9491	14.5863	18.8814	20.0165
ENSGALG00000054309	-	-1.50844	0.554439	-2.72067	0.00651503	0.0279704	0.399556	0.770597	0.570339	0.524336	0.279068	0.136041	0.163865	0.137224	0.198299	0.0667321	0.0720255	0
ENSGALG00000054379	TSPAN32	-1.04394	0.375644	-2.77907	0.00545152	0.0244	1.94987	1.4466	1.41519	1.31404	2.19444	4.64843	0.778513	0.901904	2.31389	1.32085	0.331126	0.785563
ENSGALG00000054399	-	-1.48688	0.484484	-3.069	0.00214777	0.0119733	1.3366	1.20828	1.53359	0.717636	1.09057	3.81633	0.410592	0.243549	1.32866	0.551609	0.234777	0.234296
ENSGALG00000054419	-	-2.62924	0.884591	-2.97227	0.00295611	0.0153627	0.11437	0.110726	0.259905	0.0631495	0.224073	0.74817	0.0835262	0	0.304359	0.0181625	0	0.0703243
ENSGALG00000054431	-	3.15398	0.298811	10.5551	4.81254e-26	2.1901e-23	0.403935	0.390253	0.310225	0.338555	0.434608	0.188073	3.54049	3.19636	2.09643	2.57505	4.54112	3.92011
ENSGALG00000054529	-	-2.12345	0.643984	-3.29736	0.000975972	0.00633516	0	0	0	0.00915761	0.0327521	0.0779307	0.0115118	0	0	0	0	0
ENSGALG00000054577	-	-1.58141	0.519296	-3.04529	0.00232455	0.0127453	0.11212	0.0542998	0.0799388	0.0835383	0.0787268	0.0987149	0	0.0610944	0.0374243	0.0370763	0.0625679	0.0384928
ENSGALG00000054718	FLNA	1.05037	0.156668	6.70445	2.02163e-11	1.21868e-09	34.5697	36.8275	38.5958	26.1405	31.4093	28.161	71.0944	51.4867	66.1852	43.5707	71.9214	67.9953
ENSGALG00000054738	-	-1.73651	0.700978	-2.47726	0.0132394	0.0478688	0	0	0	0.0174514	0	0.0203533	0	0	0	0.0403556	0	0
ENSGALG00000054758	-	-2.98829	1.02945	-2.90281	0.00369834	0.0182511	0.0229297	0.0886658	0.11829	0.0576091	0.686827	1.98651	0.0348687	0.0481054	0.204649	0.0221889	0.0223953	0.0671204
ENSGALG00000054765	-	1.41881	0.486232	2.91797	0.00352313	0.0176083	0.0226175	0	0.0240074	0.0987229	0	0	0.0375281	0	0	0.568394	0.0240466	0
ENSGALG00000054770	INHA	4.23586	0.468904	9.03353	1.66223e-19	4.11597e-17	64.4112	21.6532	6.30909	51.7782	27.2247	12.4341	494.225	895.213	331.076	566.493	424.949	490.936
ENSGALG00000054783	NDRG1	-1.18371	0.165303	-7.16086	8.01717e-13	6.64991e-11	41.9533	38.9467	60.8386	37.1993	45.27	51.9856	15.5331	15.1269	29.6622	15.9578	15.925	19.3546
ENSGALG00000054784	-	1.21422	0.348289	3.48625	0.000489839	0.0036017	0.68813	0.808393	1.53652	1.27458	1.12395	2.74885	3.21803	1.46265	3.68542	1.09669	3.92665	3.21747
ENSGALG00000054789	-	-4.22824	1.17644	-3.5941	0.000325519	0.00256966	0.214488	0.089017	0.062875	0.0757481	0.121773	0.0841814	0	0	0.0304512	0	0	0
ENSGALG00000054815	-	2.38484	0.804226	2.96538	0.00302306	0.0156334	0	0.0394124	0.0149877	3.8e-09	0.0169282	0.0150653	0.139738	0.0658447	0.0138193	0.0981528	0.188707	0.0661795
ENSGALG00000054822	-	1.11722	0.308372	3.62295	0.000291259	0.00234651	1.81382	2.4247	1.39042	1.74888	1.21643	1.01063	2.7515	4.60059	2.29039	4.16087	2.88718	2.56788
ENSGALG00000054831	TMEM121	-1.87915	0.571519	-3.28799	0.00100906	0.00651454	3.29345	2.91095	6.2679	11.0085	9.39054	47.7066	2.60591	2.10192	7.48658	2.72312	1.17989	3.62043
ENSGALG00000054849	-	2.97316	0.864426	3.43947	0.000582861	0.00417626	0	0.0286441	0.030502	0.0248288	0	0.0546512	0.18141	0.627493	0.910775	0.797891	0.0572962	0.375081
ENSGALG00000054873	NPPC	3.27163	0.625596	5.22962	1.69854e-07	4.15096e-06	0	0.526082	0.572252	0	0	0	0	0.568344	0	0	0	0
ENSGALG00000054959	-	-3.99779	1.22918	-3.25242	0.00114428	0.00725704	0	0.0713825	0.0744792	0.0918032	0.0359547	1.19096	0	0	0.108053	0	0	0.0704718
ENSGALG00000054970	-	-1.61933	0.646735	-2.50386	0.0122847	0.0452307	0.424573	0.480745	1.24102	0.0895002	0.674404	3.57604	0.198077	0.112204	1.39573	0.136219	0.221216	0.0734681
ENSGALG00000054972	-	-1.87522	0.433861	-4.32218	1.54496e-05	0.000199037	1.13766	1.68481	1.27665	0.805213	1.33501	4.05564	0.299727	0.440028	0.919423	0.121032	0.218803	0.810167
ENSGALG00000054988	SLC22A31	-1.95272	0.304657	-6.40956	1.45942e-10	7.37947e-09	28.6187	23.3394	34.668	23.4256	23.8451	52.2026	3.70855	7.54759	13.8614	7.90589	3.87249	5.66914
ENSGALG00000054994	-	-2.28382	0.432428	-5.28139	1.28205e-07	3.24619e-06	2.35803	2.1238	1.9361	1.0713	1.41298	0.7674	0.144248	0.527649	0.246929	0.657242	0.146859	0.496016
ENSGALG00000055022	-	1.09583	0.25222	4.34476	1.39428e-05	0.000183413	2.57402	4.24612	4.2599	2.13034	3.45104	2.48425	6.53187	5.65446	6.05651	4.65322	6.89567	5.62162
ENSGALG00000055079	-	-3.5562	1.23305	-2.88407	0.0039257	0.0190328	0.0982271	0.190237	0	0.0420469	0.148397	0.376742	0	0	0.0974436	0	0	0.0481485
ENSGALG00000055117	-	2.76205	0.292417	9.44561	3.53342e-21	1.04378e-18	7.93857	3.97642	3.54292	6.8325	3.26479	3.52912	28.6942	27.4951	17.3891	32.5766	36.0771	34.2818
ENSGALG00000055120	-	-2.28194	0.884679	-2.5794	0.00989719	0.0385494	0.17961	0.40641	0.341035	0.45228	0.50045	3.19252	0.0227712	0.0629605	0.673734	0.115319	0.0294282	0.0584066
