# Supplementary material for: Morphological Characteristics and Transcriptome Landscapes of Chicken Follicles during Selective Development
Source: Animals (Basel). 2022 Mar 11;12(6):713. doi: 10.3390/ani12060713 (PMC8944860; doi:10.3390/ani12060713)
Supplement: Supplementary file 1 [file animals-12-00713-s001.zip › Supplementary materials/Supplemental Table S6.xlsx]

## Sheet: A-GO in LWF versus SYF group
ONTOLOGY	ID	Description	Richfactor	Log10(q)	Count
BP	GO:0031668	cellular response to extracellular stimulus	0.0869565	-0.496563	2
BP	GO:0006810	transport	0.0119048	-0.496563	5
BP	GO:1901615	organic hydroxy compound metabolic process	0.0333333	-0.496563	2
BP	GO:0031344	regulation of cell projection organization	0.030303	-0.496563	2
BP	GO:0030154	cell differentiation	0.0108225	-0.496563	5
BP	GO:0043408	regulation of MAPK cascade	0.0298507	-0.496563	2
BP	GO:0048869	cellular developmental process	0.010661	-0.496563	5
BP	GO:0006886	intracellular protein transport	0.025974	-0.496563	2
BP	GO:0006022	aminoglycan metabolic process	0.1	-0.496563	1
BP	GO:0090316	positive regulation of intracellular protein transport	0.1	-0.496563	1
BP	GO:0033993	response to lipid	0.025641	-0.496563	2
BP	GO:0032273	positive regulation of protein polymerization	0.0909091	-0.496563	1
BP	GO:0006892	post-Golgi vesicle-mediated transport	0.0833333	-0.496563	1
BP	GO:0060395	SMAD protein signal transduction	0.0714286	-0.496563	1
BP	GO:0008203	cholesterol metabolic process	0.0625	-0.496563	1
BP	GO:0009888	tissue development	0.0130435	-0.496563	3
BP	GO:0006869	lipid transport	0.03125	-0.496563	1
BP	GO:0048588	developmental cell growth	0.0294118	-0.496563	1
CC	GO:0005576	extracellular region	0.0152439	-0.808858	5
CC	GO:0005615	extracellular space	0.0179372	-0.808858	4
CC	GO:0005887	integral component of plasma membrane	0.0218978	-0.808858	3
CC	GO:0031226	intrinsic component of plasma membrane	0.020979	-0.808858	3
CC	GO:0005886	plasma membrane	0.0110375	-0.808858	5
CC	GO:0071944	cell periphery	0.010661	-0.808858	5
CC	GO:0016021	integral component of membrane	0.0105042	-0.808858	5
CC	GO:0016363	nuclear matrix	0.0909091	-0.757034	1
CC	GO:0034399	nuclear periphery	0.0833333	-0.757034	1
MF	GO:0019842	vitamin binding	0.0833333	-0.741947	2
MF	GO:0008289	lipid binding	0.030303	-0.61675	2
MF	GO:0019825	oxygen binding	0.1	-0.61675	1
MF	GO:0005496	steroid binding	0.0909091	-0.61675	1
MF	GO:0003707	steroid hormone receptor activity	0.0833333	-0.61675	1
MF	GO:0008194	UDP-glycosyltransferase activity	0.0833333	-0.61675	1
MF	GO:0048018	receptor ligand activity	0.0210526	-0.61675	2
MF	GO:0005160	transforming growth factor beta receptor binding	0.0714286	-0.61675	1

## Sheet: B-KEGG in LWF versus SYF group
ID	Description	Richfactor	Log10(q)	Count
gga04020	Calcium signaling pathway	0.00444444	-0.134249	1
gga04810	Regulation of actin cytoskeleton	0.00512821	-0.134249	1
gga00564	Glycerophospholipid metabolism	0.0105263	-0.178309	1
gga04310	Wnt signaling pathway	0.0136054	-0.18485	2
gga04150	mTOR signaling pathway	0.013986	-0.18485	2
gga04920	Adipocytokine signaling pathway	0.015625	-0.18485	1
gga03320	PPAR signaling pathway	0.015873	-0.18485	1
gga04370	VEGF signaling pathway	0.0172414	-0.18485	1
gga04912	GnRH signaling pathway	0.0238095	-0.18485	2
gga00980	Metabolism of xenobiotics by cytochrome P450	0.0277778	-0.18485	1
gga04060	Cytokine-cytokine receptor interaction	0.0049505	-0.18485	3
gga03013	RNA transport	0.00684931	-0.158737	1
gga04514	Cell adhesion molecules	0.00787402	-0.158737	1
gga04350	TGF-beta signaling pathway	0.0108696	-0.178309	1

## Sheet: C-GO in SYF versus LYF group
ONTOLOGY	ID	Description	Richfactor	Log10(q)	Count
BP	GO:0033993	response to lipid	0.0384615	-0.4044	3
BP	GO:0048545	response to steroid hormone	0.0526316	-0.4044	2
BP	GO:0030154	cell differentiation	0.012987	-0.4044	6
BP	GO:0048869	cellular developmental process	0.0127932	-0.4044	6
BP	GO:0009888	tissue development	0.0173913	-0.4044	4
BP	GO:0061448	connective tissue development	0.0344828	-0.4044	2
BP	GO:0009887	animal organ morphogenesis	0.02	-0.4044	3
BP	GO:0048468	cell development	0.0151515	-0.4044	4
BP	GO:0048514	blood vessel morphogenesis	0.030303	-0.4044	2
BP	GO:0010033	response to organic substance	0.0145455	-0.4044	4
BP	GO:0001568	blood vessel development	0.0294118	-0.4044	2
BP	GO:0071604	transforming growth factor beta production	0.1	-0.4044	1
BP	GO:0001944	vasculature development	0.0277778	-0.4044	2
BP	GO:0043401	steroid hormone mediated signaling pathway	0.0588235	-0.4044	1
CC	GO:0005576	extracellular region	0.0182927	-0.553177	6
CC	GO:0005615	extracellular space	0.0179372	-0.339045	4
CC	GO:0031012	extracellular matrix	0.0298507	-0.339045	2
CC	GO:0016528	sarcoplasm	0.1	-0.339045	1
CC	GO:0031234	extrinsic component of cytoplasmic side of plasma membrane	0.0833333	-0.339045	1
CC	GO:0005623	cell	0.0246914	-0.339045	2
CC	GO:0009898	cytoplasmic side of plasma membrane	0.0714286	-0.339045	1
CC	GO:0005788	endoplasmic reticulum lumen	0.0666667	-0.339045	1
CC	GO:0098562	cytoplasmic side of membrane	0.0588235	-0.339045	1
MF	GO:0031406	carboxylic acid binding	0.0909091	-0.679922	2
MF	GO:0008270	zinc ion binding	0.0394737	-0.679922	3
MF	GO:0043177	organic acid binding	0.0714286	-0.679922	2
MF	GO:0005509	calcium ion binding	0.03	-0.596345	3
MF	GO:0046914	transition metal ion binding	0.025641	-0.513776	3
MF	GO:0046872	metal ion binding	0.012605	-0.513776	6
MF	GO:0043169	cation binding	0.0122449	-0.513776	6
MF	GO:0005518	collagen binding	0.0909091	-0.513776	1
MF	GO:0003707	steroid hormone receptor activity	0.0833333	-0.513776	1

## Sheet: D-KEGG in SYF versus LYF group
ID	Description	richfactor	Log10(q)	Count
gga04010	MAPK signaling pathway	0.00384615	-0.213424	1
gga04070	Phosphatidylinositol signaling system	0.011236	-0.452258	1
gga04540	Gap junction	0.0119048	-0.452258	1
gga04012	ErbB signaling pathway	0.0128205	-0.46028	1
gga00562	Inositol phosphate metabolism	0.0142857	-0.483543	1
gga00561	Glycerolipid metabolism	0.0166667	-0.505161	1
gga00600	Sphingolipid metabolism	0.0204082	-0.52111	1
gga00480	Glutathione metabolism	0.0208333	-0.52111	1
gga00565	Ether lipid metabolism	0.0222222	-0.548506	2
gga00980	Metabolism of xenobiotics by cytochrome P450	0.0277778	-0.548506	1
gga00051	Fructose and mannose metabolism	0.0285714	-0.548506	1
gga03320	PPAR signaling pathway	0.031746	-0.548506	2
gga04060	Cytokine-cytokine receptor interaction	0.0049505	-0.270483	1
gga00564	Glycerophospholipid metabolism	0.0105263	-0.451789	1
gga00590	Arachidonic acid metabolism	0.0204082	-0.52111	1
gga04350	TGF-beta signaling pathway	0.0217391	-0.548506	2
gga00565	Ether lipid metabolism	0.0222222	-0.548506	2
gga00591	Linoleic acid metabolism	0.0344828	-0.548506	1
gga00592	alpha-Linolenic acid metabolism	0.04	-0.548506	1

## Sheet: E-GO in LWF versus LYF group
ONTOLOGY	ID	Description	Richfactor	Log10(q)	Count
BP	GO:0009653	anatomical structure morphogenesis	0.15727	-5.66154	53
BP	GO:0030154	cell differentiation	0.138528	-5.61618	64
BP	GO:0048869	cellular developmental process	0.136461	-5.50307	64
BP	GO:0009888	tissue development	0.165217	-4.28483	38
BP	GO:0045785	positive regulation of cell adhesion	0.354839	-3.11434	11
BP	GO:0072359	circulatory system development	0.186047	-3.05319	24
BP	GO:0048468	cell development	0.143939	-3.05319	38
BP	GO:0001568	blood vessel development	0.235294	-2.98782	16
BP	GO:0001944	vasculature development	0.222222	-2.84683	16
BP	GO:0072358	cardiovascular system development	0.216216	-2.77211	16
BP	GO:0045834	positive regulation of lipid metabolic process	0.461538	-2.38791	6
BP	GO:0061448	connective tissue development	0.224138	-2.361	13
BP	GO:0022604	regulation of cell morphogenesis	0.235294	-2.3472	12
BP	GO:0042127	regulation of cell population proliferation	0.150943	-2.2106	24
BP	GO:0006869	lipid transport	0.28125	-2.18844	9
BP	GO:0010876	lipid localization	0.272727	-2.11877	9
CC	GO:0005576	extracellular region	0.164634	-7.37366	54
CC	GO:0031012	extracellular matrix	0.298507	-5.97881	20
CC	GO:0071944	cell periphery	0.123667	-3.74744	58
CC	GO:0005886	plasma membrane	0.12362	-3.65134	56
CC	GO:0005615	extracellular space	0.147982	-3.1339	33
CC	GO:0098590	plasma membrane region	0.188679	-3.01787	20
CC	GO:0019897	extrinsic component of plasma membrane	0.346154	-3.01787	9
CC	GO:0099081	supramolecular polymer	0.160584	-2.47241	22
CC	GO:0099512	supramolecular fiber	0.160584	-2.47241	22
CC	GO:0062023	collagen-containing extracellular matrix	0.25	-2.26474	10
MF	GO:0005509	calcium ion binding	0.24	-4.5986	24
MF	GO:0050839	cell adhesion molecule binding	0.28125	-1.37369	9
MF	GO:0008289	lipid binding	0.181818	-1.17907	12
MF	GO:0030545	receptor regulator activity	0.153061	-1.07178	15
MF	GO:0050840	extracellular matrix binding	0.363636	-1.04574	4
MF	GO:0008092	cytoskeletal protein binding	0.134752	-1.04574	19
MF	GO:0046983	protein dimerization activity	0.127907	-1.04574	22
MF	GO:0048018	receptor ligand activity	0.147368	-1.00112	14
MF	GO:0030546	signaling receptor activator activity	0.145833	-0.980945	14
MF	GO:0008083	growth factor activity	0.2	-0.916356	7
MF	GO:0005125	cytokine activity	0.214286	-0.887259	6
MF	GO:0043177	organic acid binding	0.214286	-0.887259	6
MF	GO:0044877	protein-containing complex binding	0.129771	-0.881929	17
MF	GO:0005160	transforming growth factor beta receptor binding	0.285714	-0.881929	4

## Sheet: F-KEGG in LWF versus LYF group
ID	Description	richfactor	Log10(q)	Count
gga04310	Wnt signaling pathway	0.0272109	-0.0535782	4
gga00564	Glycerophospholipid metabolism	0.0315789	-0.0535782	7
gga04110	Cell cycle	0.0431034	-0.0535782	5
gga04020	Calcium signaling pathway	0.0488889	-0.0994067	11
gga04270	Vascular smooth muscle contraction	0.0495868	-0.0535782	6
gga04010	MAPK signaling pathway	0.0538462	-0.273294	14
gga00100	Steroid biosynthesis	0.0555556	-0.0535782	1
gga04060	Cytokine-cytokine receptor interaction	0.0693069	-0.609253	14
gga01230	Biosynthesis of amino acids	0.0793651	-0.329868	5
gga01230	Biosynthesis of amino acids	0.0847458	-0.329868	5
gga04510	Focal adhesion	0.0890052	-1.49717	17
gga04350	TGF-beta signaling pathway	0.108696	-1.17726	10
gga00140	Steroid hormone biosynthesis	0.111111	-0.418806	4
gga00980	Metabolism of xenobiotics by cytochrome P450	0.111111	-0.418806	4
gga04115	p53 signaling pathway	0.119403	-1.10961	8
gga00830	Retinol metabolism	0.121951	-0.609253	5
gga04512	ECM-receptor interaction	0.130952	-1.62358	11
gga04068	FoxO signaling pathway	0.0327869	-0.0535782	7
gga04330	Notch signaling pathway	0.0363636	-0.0379482	4
gga04012	ErbB signaling pathway	0.0384615	-0.0309743	4
gga04514	Cell adhesion molecules	0.0393701	-0.0535782	9
gga00590	Arachidonic acid metabolism	0.0408163	-0.0535782	3
gga00564	Glycerophospholipid metabolism	0.0421053	-0.0535782	7
gga04530	Tight junction	0.044586	-0.0535782	11
gga00500	Starch and sucrose metabolism	0.0606061	-0.0379482	4
gga00561	Glycerolipid metabolism	0.0666667	-0.0535782	7
gga04914	Progesterone-mediated oocyte maturation	0.0769231	-0.0309743	7
gga00591	Linoleic acid metabolism	0.103448	-0.0595112	3
