# Supplementary material for: Morphological Characteristics and Transcriptome Landscapes of Chicken Follicles during Selective Development
Source: Animals (Basel). 2022 Mar 11;12(6):713. doi: 10.3390/ani12060713 (PMC8944860; doi:10.3390/ani12060713)
Supplement: Supplementary file 1 [file animals-12-00713-s001.zip › Supplementary materials/Supplemental Table S7.xlsx]

## Sheet: sheet1
Profile 2	Profile 3	Profile 7	Profile 12	Profile 13	Profile 15
ABCA4	ABLIM2	ANKRD22	AADACL3C	ACTC1	0 (SPOT_ID_0)
ACTR5	ACOT12	ANO2	ABHD3	ADAMTS2	AADAC
AOAH	AGPAT4	ASCL1	ACKR4	AK5	ACTA1
AQP3	AK8	B3GAT2	ACTA2	AKR1B10	ACTG2
ARHGAP22	AMH	BMF	ACTN1	ALB	ADGRG2
ARHGAP44	AMN	C2CD4A	ADAM12	ANGPTL5	AIFM2
ARHGEF5	AP1S3	C8ORF34	AEBP1	ANKRD9	ANKRD1
AURKA	ATP8A2	CABP7	ALDH1A3	ANXA1	AOC3
BLVRA	B3GNT7	CBX7	ALPL	ANXA2	ASB9
BRDT	B4GALNT3	CDH18	AQP12A	APOH	ASS1
BSX	BAIAP2L2	CGTL	BCL2L15	ARSJ	BCO1
C17ORF58	BTC	CHAT	CA4	ATP8A1	BDP1L
C1QTNF12	C26H6ORF222	COL13A1	CAPG	BST1	C15ORF39
C6ORF132	C4ORF19	CPEB1	CDC42EP4	CACNG7	CACNG4
CA8	CA9	CRYAB	CDH8	CAPN2	CCN3
CACNA2D2	CARHSP1	CYP2J19	CHIA	CAPN9	CD38
CADPS2	CCNB1	DCX	CHST8	CD109	CDYL2
CALR3	CCNI2	DEPDC7	CNN2	CDO1	CEL
CAPN8	CCNO	DOCK3	CNTN4	CHRNA2	CHST3
CAPRIN2	CDH3	DPYSL4	COL14A1	CHRNA7	CNN1
CARTPT	CKS2	EBF2	COL1A1	COL5A1	CNTF
CASTOR1	COLGALT2	EDN1	COL1A2	CRIP1	CSRP1
CBX4	CPNE4	EPHA8	COL4A1	CYP1C1	CTSEAL
CCDC40	CXCL13L3	ESRP2	COL4A2	CYP26C1	CYR61
CCDC77	CYP26B1	FAM163A	COL8A1	DRD3	CYTL1
CCDC82	CYP27A1	FAM46C	CSPG5	EDA2R	DCSTAMP
CCL19	DAB2	FER1L6	CTSA	ELAPOR2	DHRS7
CCNA1	DACH1	FST	CYP11A1	ELN	EHHADH
CD24	DNM1	GFI1	CYP2AB2	ENPP6	ELAVL4
CDCA9	ELMOD1	GJB2	DKK3	FIBIN	EMP1
CDCP1	ENO4	GRIA4	DLK2	FMOD	ENTPD8L
CEP85	ENPP4	GRIK1	DMRT1	GAP43	EPHX1L
CFAP52	ESCO2	HFM1	DMRT2	GDF7	ESRRB
CIDEA	FAM222B	HMGA2	DOK4	GJD2	FAM189A2
CLDN1	FANCE	INKA2	DUSP8	GLIS3	FAM237A
CNDP1	FNDC4	IQCA1	ECRG4	GRK5	FGR
CORO2B	FSD1	IRX5	EHD2	GSTT1L	FLVCR1
CRABP-I	FSIP1	KCNF1	EPHA2	HAS2	FLVCR2
CRYM	GPC3	KCNK2	EPHA3	HPD	GABBR2
CUTA	HAUS1	KLF15	EXFABP	HSD11B2	GADD45B
CYP1B1	HEY2	KLHDC7A	F2RL1	HSD17B3	GDF10
DAPL1	HPF1	LECT1	F5	HSD3B1	GDF11
DGAT2	HSF2BP	LITAF	FBN3	IGFALS	GFRA3
DTHD1	IGSF11	LOC100858759	FDX1L	INHBA	GLIS1
DUSP26	IL1RAPL2	LOC100859709	FHOD1	ITGA8	GPR132
EGLN3	INPP5J	LOC101749696	FN1	KCNH2	HSPB1
ELAVL2	KCNA10	LOC107054063	FNDC1	KCNT2	ID2
ENHO	KCNK12	LOC107054872	GAL3ST4	LGI3	ID3
EPCAM	KCNN1	LOC112529929	GALC	LOC101749846	IDH1
FA2H	LGI2	LOC417741	GALNT10	LOC107053122	IGF2
FAM117A	LIPG	LOC419112	GNAO1	LOC415852	INHA
FAM163B	LLGL1	LOC421232	GRM3	LOC422895	IQGAP2
FAM178B	LOC107050518	LOC422929	HAO2	LRP8	JAK3
FAM180B	LOC107057078	LPO	HCN4	LYPD1	KCNAB1
FAM207A	LOC420039	MC5R	HERPUD1	LYPD6	KNG1
FBN2	LOC430303	MET	HPGDS	MAP2	LMOD1
FBXL2	LRMDA	METTL11B	HSPB7	MMP10	LOC112530469
FEV	MAP7	MLPH	HTR2A	MYOF	LOC424199
FGF16	MED8	MMEL1	IGFBP4	NKAIN1	LOC428094
FNDC7	MSX2	NEFH	INF2	NPC2	LOC771811
FYB2	NEK5	NIPAL1	ISM1	NPY	LRRC10
GABRP	NKAIN4	NKAIN2	ITGB3	NR5A2	LRRN4
GALNT14	NKX1-2	NOL4	KCNK3	P2RX2	MLKL
GCNT1	NMI	NRAP	KCNK5	PAPPA2	MSC
GCNT2	NOS1AP	NSG1	KCNMA1	PERP2	MYL4
GCNT3	NPY4R	NWD2	KLHDC8B	PHGDH	NEURL2
GIMD1	NXPH2	PDK4	KRT7	PLTP	NOV
GMNN	PGM2L1	PIK3IP1	LAMP5	PRUNE2	NPTXR
GPAT2	PPM1H	PLAU	LCAT	RBP7	NRIP3
GPR139	RALY	PNLDC1	LEFTY1	RFESD	NTRK2
GRAMD2A	RBPJL	PPP1R14C	LOC107049146	RFLNA	OBSL1
GRB14	RHO	PROCA1	LOC107053121	S100A4	P3H4
GRID1	RNF38	PTGFR	LOC416755	SEC61A2	PAPSS2
GRIN2B	SFT2D2	PTPN3	LOX	SLC4A4	PCDH11X
GRPR	SH3YL1	PYROXD1	LOXL1	SLC51B	PDLIM7
GRTP1	SHTN1	RAB3C	LOXL2	SLC5A6	PFKFB3
GTSF1L	SLA2	RD3	LYPD6B	SV2A	PHOSPHO1
GYS2	SLAIN1	RGS7	MATN3	TPPP3	PLCD4
HECW1	SLBP	RYR2	MFAP5	TPST1	PLEKHA6
HHIP	SLC12A8	SCN11A	MFSD2B	TRH	PPARG
HOOK2	SLC2A9	SH2D6	MGLL	TUBA4B	PSTPIP2
IL9	SLC30A2	SLC16A6	MIOX	UBASH3B	PTGFRN
IRF6	SLC35G1	SLC28A2	MMP1	UPP1	RLN3
IRX3	SMAP2	SLC5A1	MMP9	VSTM2B	RUNDC3A
KCNA2	SNX22	SMIM5	NCS1	0 (SPOT_ID_1019)	SCX
KCNH4	SNX5	STKLD1	NDST1	0 (SPOT_ID_1035)	SEMA3C
KCNH5	SRCIN1	TDRD1	NFATC1	0 (SPOT_ID_1046)	SERPINB5
KCNK17	ST8SIA2	TFCP2L1	NOX1	0 (SPOT_ID_1062)	SETX
KDF1	SYT12	TMCC3	NR1H4	0 (SPOT_ID_1067)	SFN
KIF20AL	SYT15	TRPC5	NTN4L	0 (SPOT_ID_1080)	SFRP4
KLHL32	TAF4B	TSPAN32	P2RY6	0 (SPOT_ID_1085)	SHB
KRTCAP3	TENM2	TTC29	PCOLCE2	0 (SPOT_ID_1099)	SLC12A2
LHX4	TESC	UPK1B	PDE1B	0 (SPOT_ID_1101)	SLC16A5
LMOD3	TGS1	ZNF804A	PDLIM4	0 (SPOT_ID_1110)	SLC5A5
LMX1B	TLL1	0 (SPOT_ID_1006)	PDLIM5	0 (SPOT_ID_1137)	SMAD2Z
LNPK	TMEM108	0 (SPOT_ID_1020)	PDPN	0 (SPOT_ID_1145)	SMOX
LOC100859804	TMEM130	0 (SPOT_ID_1022)	PGF	0 (SPOT_ID_1146)	SOCS3
LOC101748692	TMEM63C	0 (SPOT_ID_1025)	PGRMC1	0 (SPOT_ID_1150)	SORL1
LOC101750583	TRIM63	0 (SPOT_ID_1026)	PLBD1	0 (SPOT_ID_1164)	SPATA13
LOC107051687	TRPM3	0 (SPOT_ID_1065)	PLCG1	0 (SPOT_ID_1171)	SPINK4
LOC107053690	TYMS	0 (SPOT_ID_1068)	PLCH2	0 (SPOT_ID_1177)	SPTSSB
LOC107054264	USP35	0 (SPOT_ID_1071)	PLEK2	0 (SPOT_ID_1187)	SRL
LOC107054441	VAMP7	0 (SPOT_ID_1074)	PLEKHH1	0 (SPOT_ID_1220)	STC1
LOC414835	VLDLR	0 (SPOT_ID_1076)	POSTN	0 (SPOT_ID_1221)	STEAP1
LOC417800	VOPP1	0 (SPOT_ID_1077)	PRKAR2B	0 (SPOT_ID_1226)	STRA6
LOC420748	WNT10A	0 (SPOT_ID_1078)	PRRX2	0 (SPOT_ID_1239)	SYT2
LOC420807	0 (SPOT_ID_1032)	0 (SPOT_ID_1079)	PTHLH	0 (SPOT_ID_1243)	TAGLN
LOC426385	0 (SPOT_ID_1033)	0 (SPOT_ID_1081)	RASD1	0 (SPOT_ID_1256)	TFAP4
LOC768995	0 (SPOT_ID_1034)	0 (SPOT_ID_1082)	RASL11A	0 (SPOT_ID_1274)	TNC
LRRTM4	0 (SPOT_ID_1060)	0 (SPOT_ID_1084)	RASL11B		TNFRSF6B
MAL2	0 (SPOT_ID_1066)	0 (SPOT_ID_1089)	RGCC		TNFRSF8
MAP1B	0 (SPOT_ID_1088)	0 (SPOT_ID_1092)	RGS7BP		TRPV4
MAP1LC3C	0 (SPOT_ID_1124)	0 (SPOT_ID_1094)	RHAG		TTF1
MAP6	0 (SPOT_ID_1126)	0 (SPOT_ID_1096)	RHOG		TYRP1
MAPK10	0 (SPOT_ID_1132)	0 (SPOT_ID_1103)	RPRM		VDR
MBLAC2	0 (SPOT_ID_1140)	0 (SPOT_ID_1106)	RTN2		VGLL3
MCF2L	0 (SPOT_ID_1159)	0 (SPOT_ID_1107)	S100A10		WNT4
MIEF2	0 (SPOT_ID_1167)	0 (SPOT_ID_1113)	S100A11		ZSWIM6
MPDZ	0 (SPOT_ID_1175)	0 (SPOT_ID_1114)	S100A6		0 (SPOT_ID_1000)
MPZL2	0 (SPOT_ID_1215)	0 (SPOT_ID_1120)	SELE		0 (SPOT_ID_1004)
MPZL3	0 (SPOT_ID_1227)	0 (SPOT_ID_1130)	SERPINB10		0 (SPOT_ID_1013)
MYCL	0 (SPOT_ID_1253)	0 (SPOT_ID_1131)	SERPIND1		0 (SPOT_ID_1023)
MYOD1	0 (SPOT_ID_1259)	0 (SPOT_ID_1133)	SLC17A9		0 (SPOT_ID_1028)
MYOM1	0 (SPOT_ID_1264)	0 (SPOT_ID_1135)	SLC35F2		0 (SPOT_ID_1030)
NBEAL2	0 (SPOT_ID_1282)	0 (SPOT_ID_1138)	SLC45A2		0 (SPOT_ID_1036)
NDRG1	0 (SPOT_ID_1284)	0 (SPOT_ID_1139)	SLC9A5		0 (SPOT_ID_1039)
NEFL		0 (SPOT_ID_1141)	SMOC1		0 (SPOT_ID_1087)
NGFR		0 (SPOT_ID_1142)	SMTN		0 (SPOT_ID_1097)
NPC1		0 (SPOT_ID_1144)	SPHKAP		0 (SPOT_ID_1118)
NUFIP1		0 (SPOT_ID_1149)	SUSD1		0 (SPOT_ID_1119)
NYAP2		0 (SPOT_ID_1153)	SYCN		0 (SPOT_ID_1125)
OCLN		0 (SPOT_ID_1154)	SYNC		0 (SPOT_ID_1176)
OGFR		0 (SPOT_ID_1155)	SYNDIG1L		0 (SPOT_ID_1211)
OSBPL1A		0 (SPOT_ID_1156)	TAGLN2		0 (SPOT_ID_1273)
OTUD7A		0 (SPOT_ID_1157)	TGFB1		0 (SPOT_ID_1276)
OVCH2		0 (SPOT_ID_1158)	THBS1		0 (SPOT_ID_1277)
OVOL2		0 (SPOT_ID_1160)	THEMIS2		0 (SPOT_ID_1278)
PARP14		0 (SPOT_ID_1161)	THY1
PATL2		0 (SPOT_ID_1162)	TIMP2
PEX11G		0 (SPOT_ID_1166)	TINAGL1
PGBD5		0 (SPOT_ID_1168)	TNMD
PGC		0 (SPOT_ID_1169)	TPM1
PIWIL1		0 (SPOT_ID_1170)	TRPC6
PLAC8		0 (SPOT_ID_1172)	UMOD
PLAC8L1		0 (SPOT_ID_1173)	WDR31
PLCH1		0 (SPOT_ID_1179)	XKRX
PLIN3		0 (SPOT_ID_1180)	ZP3
PLIN5		0 (SPOT_ID_1183)	0 (SPOT_ID_1003)
PODXL2		0 (SPOT_ID_1185)	0 (SPOT_ID_1011)
PPEF1		0 (SPOT_ID_1186)	0 (SPOT_ID_1018)
PPP2R3B		0 (SPOT_ID_1189)	0 (SPOT_ID_1059)
PRDM14		0 (SPOT_ID_1193)	0 (SPOT_ID_1182)
PRKAG3		0 (SPOT_ID_1199)	0 (SPOT_ID_1198)
PTCH2		0 (SPOT_ID_1200)	0 (SPOT_ID_1217)
PTF1A		0 (SPOT_ID_1202)	0 (SPOT_ID_1223)
PTPN20		0 (SPOT_ID_1203)	0 (SPOT_ID_1260)
PTTG1IP		0 (SPOT_ID_1205)
RAB19		0 (SPOT_ID_1206)
RAB32		0 (SPOT_ID_1208)
RALGPS2		0 (SPOT_ID_1209)
RAX		0 (SPOT_ID_1210)
RBM38		0 (SPOT_ID_1212)
RET		0 (SPOT_ID_1213)
RETREG1		0 (SPOT_ID_1214)
RGS11		0 (SPOT_ID_1216)
RGS16		0 (SPOT_ID_1219)
RGS9		0 (SPOT_ID_1224)
RND2		0 (SPOT_ID_1225)
S100Z		0 (SPOT_ID_1232)
SCD5		0 (SPOT_ID_1233)
SCN3B		0 (SPOT_ID_1234)
SEC16B		0 (SPOT_ID_1235)
SEMA4D		0 (SPOT_ID_1238)
SERTM1		0 (SPOT_ID_1241)
SFRP2		0 (SPOT_ID_1244)
SGK2		0 (SPOT_ID_1245)
SGSM3		0 (SPOT_ID_1246)
SH3TC1		0 (SPOT_ID_1249)
SHANK2		0 (SPOT_ID_1261)
SHC4		0 (SPOT_ID_1272)
SHISA9		0 (SPOT_ID_1275)
SLC15A1		0 (SPOT_ID_1279)
SLC22A31		0 (SPOT_ID_1280)
SLC38A3		0 (SPOT_ID_1286)
SLC7A4
SLN
SOUL
SP5
SPACA1
SPAG16
SPDYA
SRMS
ST6GALNAC1
ST6GALNAC2
STBD1
STK35
SYP
TDRD7
TDRKH
TM7SF3
TMEM121
TMEM125
TMEM132D
TMEM136
TMEM171
TMEM184A
TMEM243
TPTE
TRAF5
TRIM41
TRIM69
TTLL4
UROS
USP43
VAT1L
VWA2
WIF1
WNT6
ZNF185L
ZNF385B
ZP2
ZRANB3
ZUP1
0 (SPOT_ID_1007)
0 (SPOT_ID_1008)
0 (SPOT_ID_1010)
0 (SPOT_ID_1014)
0 (SPOT_ID_1016)
0 (SPOT_ID_1024)
0 (SPOT_ID_1027)
0 (SPOT_ID_1038)
0 (SPOT_ID_1043)
0 (SPOT_ID_1047)
0 (SPOT_ID_1049)
0 (SPOT_ID_1052)
0 (SPOT_ID_1053)
0 (SPOT_ID_1056)
0 (SPOT_ID_1058)
0 (SPOT_ID_1061)
0 (SPOT_ID_1064)
0 (SPOT_ID_1069)
0 (SPOT_ID_1070)
0 (SPOT_ID_1073)
0 (SPOT_ID_1083)
0 (SPOT_ID_1091)
0 (SPOT_ID_1093)
0 (SPOT_ID_1095)
0 (SPOT_ID_1098)
0 (SPOT_ID_1100)
0 (SPOT_ID_1104)
0 (SPOT_ID_1108)
0 (SPOT_ID_1109)
0 (SPOT_ID_1111)
0 (SPOT_ID_1116)
0 (SPOT_ID_1117)
0 (SPOT_ID_1121)
0 (SPOT_ID_1128)
0 (SPOT_ID_1136)
0 (SPOT_ID_1143)
0 (SPOT_ID_1147)
0 (SPOT_ID_1152)
0 (SPOT_ID_1165)
0 (SPOT_ID_1178)
0 (SPOT_ID_1188)
0 (SPOT_ID_1190)
0 (SPOT_ID_1191)
0 (SPOT_ID_1192)
0 (SPOT_ID_1196)
0 (SPOT_ID_1197)
0 (SPOT_ID_1201)
0 (SPOT_ID_1204)
0 (SPOT_ID_1207)
0 (SPOT_ID_1222)
0 (SPOT_ID_1228)
0 (SPOT_ID_1229)
0 (SPOT_ID_1230)
0 (SPOT_ID_1236)
0 (SPOT_ID_1242)
0 (SPOT_ID_1247)
0 (SPOT_ID_1250)
0 (SPOT_ID_1251)
0 (SPOT_ID_1254)
0 (SPOT_ID_1255)
0 (SPOT_ID_1257)
0 (SPOT_ID_1258)
0 (SPOT_ID_1263)
0 (SPOT_ID_1266)
0 (SPOT_ID_1267)
0 (SPOT_ID_1269)
0 (SPOT_ID_1281)
